# Supplementary material for: Exploration of the Regulatory Mechanism of Secondary Metabolism by Comparative Transcriptomics in Aspergillus flavus
Source: Front Microbiol. 2018 Aug 7;9:1568. doi: 10.3389/fmicb.2018.01568 (PMC6090018; doi:10.3389/fmicb.2018.01568)
Supplement: TABLE S1 — Differential expression genes in YES vs. YEP. [file Table_1.XLS]

Gene_id	WT_YES	WT_YEP	log2FoldChange	pval	padj	Gene name	InterPro description
AFLA_000330	216.1640127	489.9356269	-1.1805	0.0091931	0.048891	-	Ankyrin repeat||Ankyrin repeat-containing domain
AFLA_000550	40.25036008	189.1420774	-2.2324	1.89E-05	0.00034207	-	Cytochrome P450||Cytochrome P450, E-class, group I
AFLA_000690	617.2413719	181.8407327	1.7632	0.0001258	0.0016659	-	NAD(P)-binding domain||Alcohol dehydrogenase superfamily, zinc-type||Alcohol dehydrogenase, C-terminal||Polyketide synthase, enoylreductase domain||GroES-like||Alcohol dehydrogenase, N-terminal
AFLA_000710	108.926851	21.65616945	2.3305	6.88E-05	0.0010156	-	FAD linked oxidase, N-terminal||FAD-binding, type 2||CO dehydrogenase flavoprotein-like, FAD-binding, subdomain 2
AFLA_000750	180.1044986	595.4831738	-1.7252	0.0063948	0.037326	-	Haem-containing dehydratase
AFLA_000840	18.64183344	7074.819674	-8.568	5.83E-49	7.32E-45	-	Major facilitator superfamily||Major facilitator superfamily domain
AFLA_000850	14.75523707	8658.266428	-9.1967	3.01E-31	3.43E-28	-//-
AFLA_000860	1637.679162	458.4434639	1.8368	0.007767	0.043266	-	Sedolisin domain||Peptidase S8/S53 domain||Peptidase S8, subtilisin, Ser-active site||Peptidase S53, activation domain||Proteinase propeptide inhibitor
AFLA_000890	52.20300553	1.306150708	5.3207	3.07E-08	1.27E-06	-	Multicopper oxidase, copper-binding site||Multicopper oxidases, conserved site||Multicopper oxidase, type 3||Multicopper oxidase, type 2||Cupredoxin||Multicopper oxidase, type 1
AFLA_001010	421.1482768	7031.744233	-4.0615	8.42E-07	2.41E-05	-	Cytochrome P450, conserved site||Cytochrome P450, B-class||Cytochrome P450
AFLA_001130	0.890328616	12.68114956	-3.8322	0.0073376	0.041593	-//-
AFLA_001220	171.2418291	65.96579838	1.3762	0.00867	0.046782	-	Isochorismatase-like
AFLA_001340	140.4263734	30.86325034	2.1859	7.41E-05	0.0010873	-//-
AFLA_001350	70.68179349	17.34492802	2.0268	0.0016803	0.013382	-	Oxidoreductase FAD/NAD(P)-binding||Riboflavin synthase-like beta-barrel||Ferredoxin reductase-type FAD-binding domain
AFLA_001400	21.58435385	2.16044704	3.3206	0.0029014	0.020496	-	Fungal transcription factor
AFLA_001510	438.4067828	149.9056336	1.5482	0.0053627	0.032667	-	Amidase||Amidase signature domain
AFLA_001570	61.85023791	10.6117281	2.5431	0.00025017	0.0029492	-	Transcription factor domain, fungi
AFLA_001670	961.6875765	142.500483	2.7546	1.92E-09	1.10E-07	-	Glyoxalase/Bleomycin resistance protein/Dihydroxybiphenyl dioxygenase||Predicted 3-demethylubiquinone-9 3-methyltransferase||PhnB-like
AFLA_001710	683.1635915	90.67185209	2.9135	4.19E-10	2.91E-08	-	Aldo/keto reductase||Aldo/keto reductase/potassium channel subunit beta||NADP-dependent oxidoreductase domain
AFLA_001740	351.6998725	124.7588237	1.4952	0.0012835	0.010943	-	Amino acid/polyamine transporter I||Amino acid permease/ SLC12A domain
AFLA_001830	293.487311	15.63153867	4.2308	0.0079626	0.044062	-	Alpha/beta hydrolase fold-1||Alpha/Beta hydrolase fold
AFLA_001890	27.34864992	586.7270637	-4.4231	7.24E-16	1.26E-13	-	Glucose-methanol-choline oxidoreductase, C-terminal||Glucose-methanol-choline oxidoreductase, N-terminal||Cellobiose dehydrogenase, cytochrome domain||FAD/NAD(P)-binding domain
AFLA_001900	1152.917303	7032.696906	-2.6088	1.14E-08	5.48E-07	-	Sulfatase, N-terminal||Alkaline-phosphatase-like, core domain||Alkaline phosphatase-like, alpha/beta/alpha
AFLA_001910	113.8912668	716.920902	-2.6542	4.08E-06	9.50E-05	-//-
AFLA_001920	57.36395703	157.4807574	-1.457	0.0048095	0.029966	-	Flavin monooxygenase-like||FAD/NAD(P)-binding domain
AFLA_001940	483.7762257	1439.017563	-1.5727	0.0071855	0.040879	-	Amino acid transporter, transmembrane domain
AFLA_002000	378.5154095	0.451854376	9.7103	2.51E-30	2.42E-27	-	Lipopolysaccharide-modifying protein
AFLA_002010	17.80631678	0.854296332	4.3815	0.0015878	0.012822	-	Pectin lyase fold||Pectin lyase fold/virulence factor||EF-Hand 1, calcium-binding site
AFLA_002180	31.80462592	220.8744154	-2.7959	0.00022936	0.0027478	-//-
AFLA_002200	100.7703706	2191.738898	-4.4429	1.21E-19	3.31E-17	-	SGNH hydrolase-type esterase domain
AFLA_002210	33.90183325	1092.558193	-5.0102	1.17E-11	1.08E-09	-	Cupredoxin
AFLA_002230	4.610689945	39.46593539	-3.0976	0.0015063	0.012354	-	GNAT domain||Acyl-CoA N-acyltransferase
AFLA_002380	2.665592583	56.88536283	-4.4155	0.003511	0.023595	-	Gamma-glutamylcyclotransferase, AIG2-like
AFLA_002510	2080.678688	653.1597039	1.6715	0.00010158	0.0014079	-	ADF-H/Gelsolin-like domain||Actin-depolymerising factor homology domain||Twinfilin
AFLA_002560	6679.507256	3122.853492	1.0969	0.0090802	0.0485	-	Ribosomal protein L37ae||Zinc-binding ribosomal protein||Ribosomal protein L37ae/L37e
AFLA_002770	403.0556211	174.5350975	1.2075	0.0092762	0.049258	-	DNA polymerase subunit Cdc27
AFLA_002830	227.8288202	3190.105543	-3.8076	9.31E-07	2.63E-05	-	Glycosyl transferase, family 20
AFLA_002940	189.3680302	25.08076642	2.9165	2.44E-07	8.25E-06	-	Six-hairpin glycosidase-like||Mannan endo-1,6-alpha-mannosidase||Six-hairpin glycosidase||Glycoside hydrolase, family 76
AFLA_002990	1108.567663	451.58839	1.2956	0.0037986	0.024928	-	DNA-directed DNA polymerase, family B, conserved site||DNA polymerase, palm domain||Ribonuclease H-like domain||DNA-directed DNA polymerase, family B, exonuclease domain||DNA-directed DNA polymerase, family B||DNA-directed DNA polymerase, family B, multifunctional domain||C4-type zinc-finger of DNA polymerase delta
AFLA_003060	72.53630626	20.11528352	1.8504	0.0032925	0.022508	-//-
AFLA_003090	298.1207598	0.903708753	8.3658	2.39E-19	6.26E-17	-//-
AFLA_003290	11.8415524	0.451854376	4.7119	0.0079096	0.043866	-	FAD/NAD(P)-binding domain
AFLA_003390	203.8637946	706.4560007	-1.793	0.0014676	0.012131	-	Winged helix-turn-helix DNA-binding domain||B-block binding subunit of TFIIIC
AFLA_003400	230.6922942	2112.587944	-3.195	0.0006451	0.0063434	-//-
AFLA_003510	443.4197208	1249.122255	-1.4942	0.00080371	0.0075828	-//-
AFLA_003520	437.0882766	128.213318	1.7694	0.00012155	0.0016198	-//-
AFLA_003530	273.9014289	722.8041047	-1.3999	0.0015684	0.012749	-	Dihydroxy-acid/6-phosphogluconate dehydratase||Aconitase/3-isopropylmalate dehydratase, swivel||Dihydroxy-acid/6-phosphogluconate dehydratase, conserved site
AFLA_003710	67.63725466	3.51601017	4.2658	0.0049133	0.030462	-//-
AFLA_003720	165.0948031	11.74051943	3.8137	1.08E-06	2.97E-05	-	Major facilitator, sugar transporter-like||Sugar/inositol transporter||Major facilitator superfamily domain
AFLA_003740	815.8530366	238.4849336	1.7744	8.29E-05	0.0011945	-	Protein of unknown function DUF3431
AFLA_003770	113.2898406	5.980074323	4.2437	0.0032957	0.022509	-	Ankyrin repeat||Zinc finger, ZZ-type||Ankyrin repeat-containing domain
AFLA_003780	448.0170288	27.69296295	4.016	0.0014769	0.012179	-	Protein kinase-like domain
AFLA_003810	331.9840735	102.7990964	1.6913	0.00028766	0.0033166	-	Endonuclease/exonuclease/phosphatase||Jacalin-like lectin domain
AFLA_003870	1597.956805	3654.112767	-1.1933	0.0068589	0.039449	-	WD40-repeat-containing domain||WD40/YVTN repeat-like-containing domain||Inositol polyphosphate-related phosphatase||Endonuclease/exonuclease/phosphatase||WD40 repeat
AFLA_003920	2063.565114	650.8266505	1.6648	9.32E-05	0.0013128	-	Cysteine synthase/cystathionine beta-synthase, pyridoxal-phosphate attachment site||Tryptophan synthase beta subunit-like PLP-dependent enzyme
AFLA_003950	513.9692978	16.15254399	4.9918	1.41E-05	0.00026622	-	GNAT domain||Acyl-CoA N-acyltransferase
AFLA_003960	4037.659966	36.8186709	6.7769	0.0044073	0.028008	-	EF-hand domain||EF-hand domain pair
AFLA_004000	10.38757172	102.1834975	-3.2982	0.0034476	0.023331	-//-
AFLA_004020	1878.036395	4527.8951	-1.2696	0.0047577	0.029687	-	Ubiquitin-related domain||PH domain-like||NAD(P)-binding domain
AFLA_004170	5.977020049	135.509255	-4.5028	4.89E-06	0.00010956	-	HD domain||Cyanamide hydratase||HD/PDEase domain
AFLA_004190	138.9947706	21.11296115	2.7188	2.70E-06	6.67E-05	-//-
AFLA_004350	2272.592132	91.57504105	4.6332	4.62E-11	3.70E-09	-	Phosphatidylserine decarboxylase-related||Phophatidylserine decarboxylase||Phosphatidylserine decarboxylase
AFLA_004400	50.1381578	10.25155598	2.2901	0.001214	0.010471	-	Trypsin Inhibitor-like, cysteine rich domain
AFLA_004420	375.0834396	167.475553	1.1633	0.0088821	0.0476	-	Sphingomyelinase D/Phospholipase D||PLC-like phosphodiesterase, TIM beta/alpha-barrel domain
AFLA_004440	13.81295602	0.451854376	4.934	0.003499	0.023552	-	ABC transporter-like||P-loop containing nucleoside triphosphate hydrolase||ABC transporter, conserved site||ABC transporter type 1, transmembrane domain||AAA+ ATPase domain
AFLA_004450	873.3343336	104.6201998	3.0614	0.0014007	0.011688	-	Amino acid adenylation domain||AMP-dependent synthetase/ligase||Phosphopantetheine attachment site||Phosphopantetheine binding ACP domain||Condensation domain||AMP-binding, conserved site||Polyketide synthase, phosphopantetheine-binding domain
AFLA_004460	7587.963515	246.4684315	4.9442	1.06E-12	1.11E-10	-	Fatty acid desaturase, type 1, C-terminal||Fatty acid desaturase, type 1, core||Cytochrome b5-like heme/steroid binding domain||Cytochrome b5, heme-binding site||Fatty acid desaturase domain||Acyl-CoA desaturase, haem/steroid binding domain-containing
AFLA_004580	56.46357645	254.1250943	-2.1701	1.86E-05	0.00033827	-	Membrane transport protein
AFLA_004650	5491.860287	1501.058937	1.8713	1.79E-05	0.00032621	-	NMT1/THI5 family||SsuA/THI5-like
AFLA_004670	241.3939482	55.14633471	2.1301	2.52E-05	0.0004357	-	NAD(P)-binding domain||Alcohol dehydrogenase superfamily, zinc-type||Polyketide synthase, enoylreductase domain||GroES-like||Alcohol dehydrogenase, N-terminal
AFLA_004690	462.0542573	1267.752765	-1.4561	0.00086727	0.0080733	-//-
AFLA_004710	1375.971323	431.4366893	1.6732	0.00017187	0.0021599	-	MCM OB domain||Mini-chromosome maintenance, conserved site||Mini-chromosome maintenance protein||MCM domain||DNA replication licensing factor Mcm||Nucleic acid-binding, OB-fold||MCM N-terminal domain||P-loop containing nucleoside triphosphate hydrolase
AFLA_004730	1267.167267	428.0719209	1.5657	0.00037722	0.0041008	-	Ribokinase-like||Ribokinase||Ribokinase/fructokinase||Carbohydrate/puine kinase, PfkB, conserved site||Carbohydrate kinase PfkB
AFLA_004740	418.9033797	119.941952	1.8043	0.00012745	0.0016807	-//-
AFLA_004800	174.9470923	20.53785161	3.0906	3.67E-05	0.00059821	-	Sulfatase, N-terminal||Sulfatase, conserved site||Alkaline phosphatase-like, alpha/beta/alpha||Alkaline-phosphatase-like, core domain
AFLA_004810	34.33208463	169.7589132	-2.3059	1.16E-05	0.00022609	-//-
AFLA_004820	69.31513335	6.340574778	3.4505	2.68E-06	6.64E-05	-	GNAT domain||Acyl-CoA N-acyltransferase
AFLA_004910	334.3148006	3.967864546	6.3967	0.0016118	0.012968	-	Major facilitator superfamily||Major facilitator superfamily domain
AFLA_004960	203.0965338	20.96488805	3.2761	5.50E-09	2.86E-07	-	Dimeric alpha-beta barrel||Antibiotic biosynthesis monooxygenase domain
AFLA_004980	883.9318082	115.1098102	2.9409	4.21E-10	2.91E-08	-//-
AFLA_005040	337.5607106	48.42579001	2.8013	0.00025023	0.0029492	-	Phenazine biosynthesis PhzF protein
AFLA_005130	123.9765818	8.846580432	3.8088	1.53E-05	0.00028567	-	Heterokaryon incompatibility||Aldolase-type TIM barrel||Lysine-2,3-aminomutase/glutamate 2,3-aminomutase
AFLA_005360	118.3445025	2.061622198	5.8431	0.00029662	0.003382	-	Berberine/berberine-like||CO dehydrogenase flavoprotein-like, FAD-binding, subdomain 2||FAD-binding, type 2||FAD-binding, type 2, subdomain 1||FAD linked oxidase, N-terminal
AFLA_005390	12.53640145	0	Inf	0.0018775	0.014673	-	Alpha/Beta hydrolase fold||Xaa-Pro dipeptidyl-peptidase-like domain
AFLA_005410	525.1881062	205.2658869	1.3553	0.002395	0.017746	-	Ankyrin repeat||P-loop containing nucleoside triphosphate hydrolase||Calcium/calmodulin-dependent/calcium-dependent protein kinase||Protein kinase-like domain||AAA+ ATPase domain||Ankyrin repeat-containing domain||Protein kinase domain
AFLA_005430	649.707953	193.938376	1.7442	0.0012351	0.010595	-	Bacteriophage T5, Orf172 DNA-binding
AFLA_005480	181.2137578	1070.625112	-2.5627	5.72E-08	2.21E-06	-	NAD(P) transhydrogenase, alpha subunit, C-terminal||NADP transhydrogenase, beta subunit||NAD(P)-binding domain||NAD(P) transhydrogenase, alpha subunit||Alanine dehydrogenase/pyridine nucleotide transhydrogenase, conserved site-2||Alanine dehydrogenase/pyridine nucleotide transhydrogenase, NAD(H)-binding domain
AFLA_005520	348.4489143	804.7890362	-1.2077	0.0063057	0.036909	-	Fungal transcription factor||Zn(2)-C6 fungal-type DNA-binding domain
AFLA_005560	392.9397052	1915.939993	-2.2857	0.0020949	0.016043	-//-
AFLA_005570	445.9181735	2222.341167	-2.3172	1.56E-05	0.00028989	-	Short-chain dehydrogenase/reductase SDR||NAD(P)-binding domain
AFLA_005710	89.85836876	28.20639246	1.6716	0.0037836	0.024843	-	Impact, N-terminal||Impact family||Uncharacterised protein family UPF0029, Impact, conserved site||Ribosomal protein S5 domain 2-type fold
AFLA_005720	3456.454594	11744.39645	-1.7646	3.23E-05	0.00053659	-//-
AFLA_005760	166.537844	7.656542304	4.443	1.94E-12	1.93E-10	-//-
AFLA_005790	810.4403094	359.3976026	1.1731	0.0060528	0.035728	-//-
AFLA_005870	1315.776699	499.830091	1.3964	0.0013527	0.011409	-	GTP cyclohydrolase I, conserved site||GTP cyclohydrolase I domain||GTP cyclohydrolase I
AFLA_005930	298.3176019	71.01991535	2.0706	2.41E-05	0.00042212	-	Butirosin biosynthesis, BtrG-like||Gamma-glutamylcyclotransferase, AIG2-like
AFLA_005950	43.71863496	116.9685528	-1.4198	0.0085474	0.04636	-	Proteolipid membrane potential modulator
AFLA_006040	763.2186511	78.96299682	3.2728	1.00E-05	0.00020039	-//-
AFLA_006100	634.2212702	4720.540708	-2.8959	1.09E-10	8.40E-09	-	Domain of unknown function DUF4243
AFLA_006150	449.883416	170.5173873	1.3996	0.0022847	0.017114	-	Flavin monooxygenase-like||Flavin monooxygenase FMO||FAD/NAD(P)-binding domain
AFLA_006300	8804.129059	2912.185489	1.5961	0.00021285	0.0025699	-	Nucleoside diphosphate kinase, active site||Nucleoside diphosphate kinase
AFLA_006330	1725.71018	620.1537953	1.4765	0.00069793	0.0067624	-//-
AFLA_006340	107.7230214	18.71565643	2.525	1.76E-05	0.00032154	-	Glycoside hydrolase superfamily||Glycoside hydrolase, catalytic domain||Glycoside hydrolase family 18, catalytic domain||Glycoside hydrolase, chitinase active site
AFLA_006350	12751.66482	2578.436246	2.3061	6.32E-08	2.41E-06	-	FAD/NAD(P)-binding domain||Pyridine nucleotide-disulphide oxidoreductase, class-II
AFLA_006360	111.5193141	680.7503301	-2.6098	1.14E-05	0.00022172	-	HAD-like domain||P-type ATPase, cytoplasmic domain N||P-type ATPase, transmembrane domain||Cation-transporting P-type ATPase, N-terminal||P-type ATPase||P-type ATPase, phosphorylation site||P-type ATPase, A domain||P-type ATPase, subfamily IIIA
AFLA_006460	247.0212282	35.68775711	2.7911	2.32E-05	0.00040999	-//-
AFLA_006570	214.5610051	622.3728539	-1.5364	0.0007258	0.0069868	-	CoA-transferase family III domain||CoA-transferase family III
AFLA_006580	1749.457983	557.1006334	1.6509	0.00013434	0.0017494	-	WW domain
AFLA_006590	4486.193566	1758.374764	1.3512	0.0042349	0.027209	-	Glycoside hydrolase, catalytic domain||Protein of unknown function DUF963||Glycoside hydrolase superfamily
AFLA_006610	269.2448314	1185.200788	-2.1381	1.70E-06	4.44E-05	-	Alpha/beta hydrolase fold-3||Alpha/Beta hydrolase fold
AFLA_006630	1019.776557	266.1329845	1.938	2.42E-05	0.00042468	-	Iron permease FTR1/Fip1/EfeU
AFLA_006740	116.3332744	37.588651	1.6299	0.0029863	0.020942	-	Glycoside hydrolase family 71
AFLA_006770	1827.321857	628.334569	1.5401	0.0003971	0.0042689	-	Nin one binding (NOB1) Zn-ribbon-like||Ribonuclease, PIN domain||Ribonuclease Nob1, eukaryote
AFLA_007010	9082.156466	2743.808376	1.7269	4.50E-05	0.00071116	-	Mitochondrial substrate/solute carrier||Mitochondrial carrier domain
AFLA_007030	300.3372445	1738.067497	-2.5328	2.58E-08	1.09E-06	-	RNA polymerase II-binding domain||CID domain||RNA recognition motif domain||ENTH/VHS||Nucleotide-binding alpha-beta plait domain
AFLA_007040	4739.907474	1041.683993	2.1859	6.55E-07	1.97E-05	-	Cys/Met metabolism, pyridoxal phosphate-dependent enzyme||O-acetylhomoserine/O-acetylserine sulfhydrylase||Pyridoxal phosphate-dependent transferase, major region, subdomain 2||Pyridoxal phosphate-dependent transferase, major region, subdomain 1||Pyridoxal phosphate-dependent transferase
AFLA_007150	142.2261487	38.06297741	1.9017	0.00035404	0.0038926	-	Ssl1-like||TFIIH subunit Ssl1/p44
AFLA_007700	9.159705529	54.61835096	-2.576	0.00031249	0.0035252	-//-
AFLA_007760	459.416242	2973.560922	-2.6943	6.75E-06	0.00014279	-	FAD/NAD(P)-binding domain||Flavin monooxygenase FMO||Flavin monooxygenase-like
AFLA_007810	31.20380658	16429.13042	-9.0403	4.98E-24	2.61E-21	-	Isopenicillin N synthase-like||Oxoglutarate/iron-dependent dioxygenase||Non-haem dioxygenase N-terminal domain
AFLA_007820	5.377339803	1757.633593	-8.3525	1.95E-33	2.44E-30	-//-
AFLA_007830	21.56776952	4399.593338	-7.6723	2.87E-21	9.25E-19	-	P-loop containing nucleoside triphosphate hydrolase||Aminotransferase class IV
AFLA_007840	433.5774411	2269.916571	-2.3883	7.68E-08	2.88E-06	-	Aminotransferase class V domain||GNAT domain||Pyridoxal phosphate-dependent transferase, major region, subdomain 1||Acyl-CoA N-acyltransferase||Pyridoxal phosphate-dependent transferase
AFLA_007850	87.21809232	863.0074531	-3.3067	3.55E-12	3.36E-10	-//-
AFLA_007860	724.9118681	8350.717343	-3.526	1.11E-14	1.59E-12	-	Major facilitator superfamily domain||Proton-dependent oligopeptide transporter family
AFLA_007870	13.3088491	1641.540338	-6.9465	1.24E-19	3.31E-17	-	Phophatidylserine decarboxylase||Phosphatidylserine decarboxylase-related||Phosphatidylserine decarboxylase
AFLA_007970	133.8716507	866.7222523	-2.6947	5.61E-08	2.17E-06	-	Short-chain dehydrogenase/reductase SDR||NAD(P)-binding domain
AFLA_007990	29.85919426	3.417185328	3.1273	0.00090789	0.008377	-	GNAT domain||Acyl-CoA N-acyltransferase
AFLA_008040	40.69173229	197.4529321	-2.2787	0.0053001	0.032428	-	Shikimate kinase/gluconokinase||Quinate/shikimate 5-dehydrogenase/glutamyl-tRNA reductase||Shikimate dehydrogenase substrate binding, N-terminal||P-loop containing nucleoside triphosphate hydrolase||NAD(P)-binding domain||3-dehydroquinate dehydratase type I
AFLA_008190	141.8140955	477.4751848	-1.7514	0.00019545	0.002401	-//-
AFLA_008300	1077.257757	430.0638521	1.3247	0.0026523	0.019267	-	Ubiquitin-conjugating enzyme/RWD-like||Ubiquitin-conjugating enzyme E2||Ubiquitin-conjugating enzyme, active site
AFLA_008350	125.8403139	362.9173418	-1.528	0.0011415	0.01001	-	Copper amine oxidase, N-terminal||Copper amine oxidase, C-terminal||Copper amine oxidase
AFLA_008370	503.0817263	3760.65742	-2.9021	8.56E-11	6.73E-09	-	RTA-like protein
AFLA_008410	222.8935297	3.113568214	6.1616	4.54E-17	9.06E-15	-	Major facilitator superfamily domain||Major facilitator superfamily
AFLA_008440	113.0247724	353.0383305	-1.6432	0.00041836	0.0044631	-//-
AFLA_008560	103.5130785	387.6040949	-1.9048	0.0026654	0.019328	-	Six-hairpin glycosidase-like||Glycosyl hydrolase family 92||Alpha-1,2-mannosidase, putative||Glycoside hydrolase-type carbohydrate-binding
AFLA_008620	156.6416488	11.45888185	3.7729	2.96E-10	2.16E-08	-	Proline racemase family||Ankyrin repeat||Ankyrin repeat-containing domain
AFLA_008690	22.33768343	81.69354692	-1.8707	0.0019766	0.015295	-	Protein of unknown function DUF3140
AFLA_008880	24.24888183	3654.341614	-7.2355	1.65E-14	2.30E-12	-	Alcohol dehydrogenase, N-terminal||Polyketide synthase, enoylreductase domain||GroES-like||Alcohol dehydrogenase, zinc-type, conserved site||NAD(P)-binding domain||Alcohol dehydrogenase superfamily, zinc-type||Alcohol dehydrogenase, C-terminal
AFLA_008890	3444.874502	1063.368049	1.6958	7.51E-05	0.0010957	-	Pyridoxal phosphate-dependent transferase||Pyridoxal phosphate-dependent transferase, major region, subdomain 1||Pyridoxal phosphate-dependent decarboxylase||Glutamate decarboxylase
AFLA_008920	742.697998	2055.142334	-1.4684	0.0055584	0.033583	-//-
AFLA_009040	111.2026406	937.5861421	-3.0758	1.89E-05	0.00034178	-	Isopropylmalate dehydrogenase-like domain||Isocitrate and isopropylmalate dehydrogenases family||Isopropylmalate dehydrogenase||Isocitrate/isopropylmalate dehydrogenase, conserved site
AFLA_009250	185.4176624	20.87822593	3.1507	0.0032359	0.022258	-//-
AFLA_009270	275.8235779	97.39865927	1.5018	0.0015855	0.012822	-//-
AFLA_009380	156.4011494	24.19407635	2.6925	1.96E-06	5.04E-05	-	Metallo-beta-lactamase
AFLA_009430	147.5371469	33.79629244	2.1261	0.00010393	0.0014287	-	Protein of unknown function DUF953, thioredoxin-like||Thioredoxin-like fold
AFLA_009570	1.545555387	29.12236882	-4.2359	5.12E-05	0.00079348	-//-
AFLA_009590	2.819576217	326.1684766	-6.854	6.20E-22	2.36E-19	-	Anhydro-N-acetylmuramic acid kinase
AFLA_009600	5.312071353	372.4161832	-6.1315	1.42E-14	2.01E-12	-	Sugar/inositol transporter||Major facilitator, sugar transporter-like||Sugar transporter, conserved site||Major facilitator superfamily domain
AFLA_009750	17.81930276	0	Inf	0.00013477	0.0017532	-	Major facilitator superfamily domain||Major facilitator superfamily
AFLA_010010	91.02602973	32.15909173	1.5011	0.0091384	0.048683	-	Polyketide synthase, phosphopantetheine-binding domain||Male sterility, NAD-binding||AMP-binding, conserved site||NAD(P)-binding domain||Condensation domain||Phosphopantetheine binding ACP domain||AMP-dependent synthetase/ligase
AFLA_010100	9.236165043	76.29977157	-3.0463	0.00097885	0.0088935	-//-
AFLA_010140	21.16749724	120.190446	-2.5054	0.0060527	0.035728	-//-
AFLA_010170	600.8768186	28.44602927	4.4008	1.43E-10	1.07E-08	-	Short-chain dehydrogenase/reductase SDR||Short-chain dehydrogenase/reductase, conserved site||NAD(P)-binding domain
AFLA_010180	211.0808259	2995.248013	-3.8268	2.68E-07	9.06E-06	-	Thioredoxin-like fold
AFLA_010590	59.27189137	429.3132587	-2.8566	8.60E-06	0.00017543	-	Protein of unknown function DUF1749||Alpha/Beta hydrolase fold
AFLA_010640	176.9972251	688.403391	-1.9595	0.0015613	0.012707	-	Major facilitator superfamily||Major facilitator superfamily domain
AFLA_010760	493.3319196	2395.061611	-2.2794	2.36E-07	8.03E-06	-	Lipopolysaccharide-modifying protein
AFLA_010770	513.4166279	98.59627322	2.3805	5.08E-07	1.59E-05	-	Porphobilinogen deaminase||Porphobilinogen deaminase, dipyrromethane cofactor binding site||Porphobilinogen deaminase, C-terminal||Porphobilinogen deaminase, N-terminal
AFLA_010860	329.9239504	31.05828506	3.4091	2.98E-11	2.50E-09	-	WD40/YVTN repeat-like-containing domain||WD40-repeat-containing domain||Anaphase-promoting complex subunit 4, WD40 domain||WD40 repeat||WD40 repeat, conserved site||WD40-like Beta Propeller||Six-bladed beta-propeller, TolB-like
AFLA_010910	6824.280511	2245.522184	1.6036	0.0001759	0.0022017	-	FKBP-type peptidyl-prolyl cis-trans isomerase domain||Peptidyl-prolyl cis-trans isomerase, FKBP-type
AFLA_011090	66.96863312	14.43135539	2.2143	0.0057053	0.034171	-	Major facilitator superfamily domain||Major facilitator superfamily
AFLA_011220	77.45357309	1.256738287	5.9456	3.50E-11	2.87E-09	-	Glucose-methanol-choline oxidoreductase, N-terminal||Glucose-methanol-choline oxidoreductase||FAD/NAD(P)-binding domain||Glucose-methanol-choline oxidoreductase, C-terminal
AFLA_011240	795.327648	313.499955	1.3431	0.0036173	0.024129	-	Protein of unknown function DUF4237
AFLA_011250	580.609242	133.6607624	2.119	5.09E-06	0.00011329	-	Metallo-beta-lactamase
AFLA_011280	170.8437562	475.6749418	-1.4773	0.0010699	0.0095489	-	Acyl-CoA dehydrogenase/oxidase, N-terminal||Acyl-CoA dehydrogenase/oxidase C-terminal||Acyl-CoA oxidase/dehydrogenase, central domain||Acyl-CoA dehydrogenase/oxidase, N-terminal and middle domain
AFLA_011360	137.3982742	16.6490141	3.0449	0.00027604	0.0032148	-//-
AFLA_011380	46.85083714	186.8808472	-1.996	0.00010869	0.0014831	-	Alpha/Beta hydrolase fold||Alpha/beta hydrolase fold-1
AFLA_011470	179.5252694	599.3834254	-1.7393	0.0056299	0.033885	-//-
AFLA_011530	1400.640969	36083.31073	-4.6872	3.20E-22	1.32E-19	-//-
AFLA_011590	443.8782863	190.2403147	1.2223	0.0079682	0.044074	-	CSN8/PSMD8/EIF3K||COP9 signalosome, subunit CSN8
AFLA_011700	5459.81293	12781.35554	-1.2271	0.0043637	0.027823	-	Kre9/Knh1 family
AFLA_011740	713.1012614	5191.313561	-2.8639	2.08E-07	7.20E-06	-	Pyridoxal phosphate-dependent transferase||Pyridoxal phosphate-dependent transferase, major region, subdomain 1||Pyridoxal phosphate-dependent transferase, major region, subdomain 2||Cys/Met metabolism, pyridoxal phosphate-dependent enzyme
AFLA_011750	225.7527112	59.05748008	1.9346	0.00011194	0.0015158	-	S-adenosyl-L-methionine-dependent methyltransferase
AFLA_011920	454.3312669	172.606757	1.3963	0.0031298	0.021731	-	G-patch domain||Domain of unknown function DUF4187
AFLA_011940	832.7754825	2161.666487	-1.3761	0.0014922	0.012264	-//-
AFLA_011950	405.6095393	1621.976443	-1.9996	3.98E-05	0.00063946	-//-
AFLA_011970	206.6496125	1258.749492	-2.6067	5.64E-07	1.74E-05	-	Tetracycline resistance protein TetA/multidrug resistance protein MdtG||Major facilitator superfamily||Major facilitator superfamily domain
AFLA_011990	9.932153185	83.84160781	-3.0775	3.89E-06	9.11E-05	-//-
AFLA_012000	29.76721929	405.4071078	-3.7676	2.40E-13	2.74E-11	-	Zn(2)-C6 fungal-type DNA-binding domain
AFLA_012010	234.3528506	2749.804684	-3.5526	1.97E-14	2.72E-12	-	Transcription factor domain, fungi
AFLA_012030	90.62322371	818.6408952	-3.1753	1.99E-11	1.75E-09	-	Ion channel regulatory protein, UNC-93||Major facilitator superfamily domain
AFLA_012050	106.5334658	347.3867029	-1.7052	0.00028067	0.0032562	-	Metal-dependent hydrolase, composite domain||Metal-dependent hydrolase||N-acetylglucosamine-6-phosphate deacetylase||Amidohydrolase-related
AFLA_012060	114.9767492	678.8542342	-2.5618	4.08E-05	0.00065476	-	Glucose-methanol-choline oxidoreductase, C-terminal||Glucose-methanol-choline oxidoreductase||Glucose-methanol-choline oxidoreductase, N-terminal||FAD/NAD(P)-binding domain
AFLA_012080	53.75208477	1270.259891	-4.5627	1.66E-06	4.35E-05	-	Glucosamine-6-phosphate isomerase, conserved site||Glucosamine/galactosamine-6-phosphate isomerase||Glucosamine-6-phosphate isomerase
AFLA_012180	320.7305483	107.912429	1.5715	0.0010852	0.0096514	-	Domain of unknown function DUF59
AFLA_012380	771.7557767	2097.359543	-1.4424	0.00078625	0.0074629	-	U3 small nucleolar ribonucleoprotein complex, subunit Mpp10
AFLA_012400	229.4804012	1249.552418	-2.445	5.99E-08	2.30E-06	-	NAD(P)-binding domain||Short-chain dehydrogenase/reductase, conserved site||Short-chain dehydrogenase/reductase SDR
AFLA_012450	320.3041592	891.7617912	-1.4772	0.00074603	0.0071404	-	Nucleoporin, Nup133/Nup155-like, C-terminal
AFLA_012880	614.3457662	261.344829	1.2331	0.0054157	0.032911	-	Regulator of chromosome condensation 1/beta-lactamase-inhibitor protein II||Regulator of chromosome condensation, RCC1
AFLA_012910	1.995580658	55.47907394	-4.7971	3.71E-06	8.74E-05	-	Sugar/inositol transporter||Major facilitator, sugar transporter-like||Sugar transporter, conserved site||Major facilitator superfamily domain
AFLA_012960	394.526895	1995.783175	-2.3388	2.82E-05	0.00047984	-	Glycoside hydrolase superfamily||Glycoside hydrolase, catalytic domain||Glycoside hydrolase, family 5
AFLA_013020	0.261078063	14.42666359	-5.7881	0.0019597	0.015184	-	Major facilitator superfamily domain||Major facilitator superfamily
AFLA_013060	42.32053084	249.2877662	-2.5584	0.001823	0.014363	-	Ion channel regulatory protein, UNC-93||Major facilitator superfamily domain
AFLA_013200	24.49337556	101.5787277	-2.0521	0.00038934	0.0042071	-	Zn(2)-C6 fungal-type DNA-binding domain
AFLA_013290	25.04436742	0.854296332	4.8736	9.97E-05	0.0013895	-//-
AFLA_013350	114.8135377	589.5365745	-2.3603	2.10E-07	7.23E-06	-//-
AFLA_013360	1650.410856	4629.517398	-1.488	0.003658	0.024259	-	Cyanovirin-N
AFLA_013400	1050.176149	3916.552726	-1.899	0.0014121	0.011752	-	Ankyrin repeat-containing domain||Ankyrin repeat
AFLA_013410	256.2814085	17.6289115	3.8617	0.0037689	0.024785	-	GNAT domain||Acyl-CoA N-acyltransferase
AFLA_013540	226.0696041	66.47165207	1.766	0.00034992	0.0038574	-	Carboxylesterase type B, active site||Carboxylesterase type B, conserved site||Carboxylesterase, type B||Alpha/Beta hydrolase fold
AFLA_013550	65.58245463	2.612301417	4.6499	4.40E-06	0.00010102	-//-
AFLA_013560	271.7921555	66.55897087	2.0298	3.55E-05	0.00058022	-	Alpha/Beta hydrolase fold||Alpha/beta hydrolase fold-1
AFLA_013770	21.67306903	0	Inf	2.36E-05	0.00041534	-//-
AFLA_013820	19.06661707	202.3272155	-3.4076	0.0032827	0.02249	-	Major facilitator, sugar transporter-like||Sugar/inositol transporter||Sugar transporter, conserved site||Major facilitator superfamily domain
AFLA_013830	413.252159	2649.39152	-2.6806	4.34E-05	0.00068999	-	Amino acid transporter, transmembrane domain
AFLA_014030	6.467806691	34.13187007	-2.3998	0.0076402	0.042732	-//-
AFLA_014190	0	15.64397044	#NAME?	0.0011721	0.010186	-	Fibronectin type III-like domain||Glycoside hydrolase, family 3, N-terminal||Glycoside hydrolase family 3 C-terminal domain||Glycoside hydrolase superfamily||Glycoside hydrolase family 3
AFLA_014230	119.7023733	548.0020424	-2.1947	0.0043932	0.027968	-	Phosphatidylserine decarboxylase||Phosphatidylserine decarboxylase-related
AFLA_014460	15.04947953	75.21051657	-2.3212	0.0032839	0.02249	-	FAD/NAD(P)-binding domain
AFLA_014470	74.30118822	478.2155822	-2.6862	1.96E-08	8.54E-07	-	NAD(P)-binding domain||Short-chain dehydrogenase/reductase SDR
AFLA_014480	25.83626319	174.0781773	-2.7523	4.56E-07	1.46E-05	-	NAD(P)-binding domain
AFLA_014490	39.79634044	133.345206	-1.7445	0.002926	0.020604	-	Zn(2)-C6 fungal-type DNA-binding domain||Fungal transcription factor
AFLA_014530	13.15846382	147.6849267	-3.4885	0.0053183	0.032491	-	Oxidoreductase FAD/NAD(P)-binding||Ferredoxin reductase-type FAD-binding domain||Globin/Protoglobin||Globin-like||Riboflavin synthase-like beta-barrel||Phenol hydroxylase reductase||Globin||Flavohemoprotein
AFLA_014600	5546.007108	2352.561775	1.2372	0.0036366	0.024194	-	Profilin
AFLA_014730	210.6499016	1832.75237	-3.1211	1.45E-05	0.00027302	-	Urease accessory protein UreD
AFLA_014890	884.1680702	7.609804113	6.8603	9.69E-07	2.73E-05	-//-
AFLA_014900	22.96800285	1.659180243	3.7911	0.00102	0.0091951	-//-
AFLA_014930	2471.729145	609.4588865	2.0199	4.65E-06	0.00010533	-	Glutathione S-transferase, C-terminal-like||tRNA-binding domain||Glutathione S-transferase, C-terminal||Nucleic acid-binding, OB-fold
AFLA_014940	295.9656424	975.9086563	-1.7213	0.00024968	0.002949	-	Alcohol dehydrogenase superfamily, zinc-type||Alcohol dehydrogenase, C-terminal||NAD(P)-binding domain||Alcohol dehydrogenase, zinc-type, conserved site||Polyketide synthase, enoylreductase domain||Alcohol dehydrogenase, N-terminal||GroES-like
AFLA_014950	1247.938934	4117.070362	-1.7221	0.00029634	0.003382	-	Short-chain dehydrogenase/reductase SDR||NAD(P)-binding domain
AFLA_015070	58.43890845	11.51074506	2.3439	0.0011224	0.0098641	-//-
AFLA_015090	1438.240262	285.3938075	2.3333	3.22E-07	1.06E-05	-	Heterokaryon incompatibility Het-C
AFLA_015180	623.2292613	4085.070647	-2.7125	1.57E-09	9.15E-08	-//-
AFLA_015190	1117.033701	4112.223552	-1.8802	0.0020527	0.015777	-	Protein of unknown function DUF4452
AFLA_015350	1373.040735	322.1178985	2.0917	4.73E-06	0.00010666	-	Aldehyde dehydrogenase N-terminal domain||Aldehyde dehydrogenase, glutamic acid active site||Aldehyde dehydrogenase domain||Aldehyde dehydrogenase, C-terminal||Aldehyde/histidinol dehydrogenase
AFLA_015400	1141.603185	3114.989771	-1.4482	0.00083103	0.0078054	-	DNA-directed RNA polymerase, helix hairpin domain||DNA-directed RNA polymerase, phage-type||DNA-directed RNA polymerase, N-terminal
AFLA_015420	11353.58845	526.4263143	4.4308	1.23E-13	1.47E-11	-	Flavodoxin-like||Thiamin diphosphate-binding fold||Flavodoxin/nitric oxide synthase||Nitrite/sulphite reductase 4Fe-4S domain||Pyruvate flavodoxin/ferredoxin oxidoreductase, N-terminal||Nitrite/Sulfite reductase ferredoxin-like domain||Transketolase C-terminal/Pyruvate-ferredoxin oxidoreductase domain II||Nitrite/sulphite reductase iron-sulphur/sirohaem-binding site||Flavoprotein-like domain
AFLA_015500	467.1970597	119.1769464	1.9709	1.87E-05	0.00033901	-	Protein of unknown function DUF866, eukaryotic
AFLA_015520	101.2560152	30.59142957	1.7268	0.0022722	0.017048	-	Tetratricopeptide-like helical domain
AFLA_015530	363.798166	15.97028303	4.5097	1.28E-07	4.64E-06	-	Leucine-rich repeat domain, L domain-like
AFLA_015540	1.616951673	155.1909451	-6.5846	8.22E-05	0.0011892	-	Amino acid transporter, transmembrane domain
AFLA_015550	90.88896047	662.7473911	-2.8663	1.47E-06	3.89E-05	-	Sugar/inositol transporter||Major facilitator, sugar transporter-like||Major facilitator superfamily domain||Sugar transporter, conserved site
AFLA_015570	1.105252042	19.46878202	-4.1387	0.00086506	0.0080647	-//-
AFLA_015720	838.612759	345.2151374	1.2805	0.0035728	0.023933	-	LSM domain||U6 snRNA-associated Sm-like protein LSm2||LSM domain, eukaryotic/archaea-type
AFLA_015770	21.45161324	1.306150708	4.0377	0.0033312	0.02269	-	ABC transporter-like||P-loop containing nucleoside triphosphate hydrolase||ABC transporter type 1, transmembrane domain||AAA+ ATPase domain||ABC transporter, conserved site
AFLA_015780	15.77030479	0	Inf	0.00038978	0.0042082	-	Tetrapeptide transporter, OPT1/isp4||Oligopeptide transporter, OPT superfamily
AFLA_015860	5.895167269	34.29259838	-2.5403	0.0027003	0.019491	-	Aconitase/3-isopropylmalate dehydratase large subunit, alpha/beta/alpha, subdomain 1/3||Aconitase/3-isopropylmalate dehydratase large subunit, alpha/beta/alpha domain||Aconitase/3-isopropylmalate dehydratase large subunit, alpha/beta/alpha, subdomain 2||Phosphatidylethanolamine-binding protein||Aconitase/isopropylmalate dehydratase
AFLA_015880	12.97131153	1170.236911	-6.4953	0.00012249	0.0016281	-	P-loop containing nucleoside triphosphate hydrolase||ABC transporter-like||ABC-2 type transporter
AFLA_015930	431.0486325	123.2119444	1.8067	9.90E-05	0.0013814	-	P-loop containing nucleoside triphosphate hydrolase
AFLA_015970	41.57233472	4.328200834	3.2638	0.0001644	0.0020869	-	Oxoglutarate/iron-dependent dioxygenase||Isopenicillin N synthase-like
AFLA_016050	10.61295164	84.16464877	-2.9874	0.0024317	0.017934	-	Mannosyltransferase 1, CMT1
AFLA_016100	364.7217823	4.347998636	6.3903	6.93E-15	1.05E-12	-	FAD/NAD(P)-binding domain||Glucose-methanol-choline oxidoreductase, N-terminal||Glucose Oxidase, domain 2
AFLA_016110	316.7609599	2.866506109	6.788	1.64E-12	1.66E-10	-	Glucose-methanol-choline oxidoreductase, C-terminal||FAD/NAD(P)-binding domain||Glucose-methanol-choline oxidoreductase, N-terminal
AFLA_016120	2975.187039	76.85720577	5.2747	2.02E-25	1.21E-22	-	S-adenosyl-L-methionine-dependent methyltransferase||O-methyltransferase, family 2||O-methyltransferase COMT-type
AFLA_016130	2067.088512	60.99595201	5.0827	1.03E-23	4.97E-21	-	Winged helix-turn-helix DNA-binding domain
AFLA_016140	608.3863677	8.387583469	6.1806	5.24E-15	8.13E-13	-	Scytalone dehydratase||NTF2-like domain
AFLA_016220	18.80406987	0.402441955	5.5461	0.00043756	0.0046209	-	LURP1-related protein domain||Tubby C-terminal-like domain
AFLA_016240	5.168544213	37.00868549	-2.84	0.00062578	0.0061825	-//-
AFLA_016290	99.17065902	8.345313634	3.5709	6.30E-08	2.41E-06	-	GroES-like||Polyketide synthase, enoylreductase domain||NAD(P)-binding domain||Alcohol dehydrogenase superfamily, zinc-type
AFLA_016300	47.83600452	1.207325866	5.3082	1.35E-07	4.85E-06	-	Aldolase-type TIM barrel||NADH:flavin oxidoreductase/NADH oxidase, N-terminal
AFLA_016320	120.6208031	2.012209777	5.9056	4.76E-14	6.23E-12	-	Polyketide synthase, enoylreductase domain||Alcohol dehydrogenase, N-terminal||GroES-like||Alcohol dehydrogenase superfamily, zinc-type||Alcohol dehydrogenase, C-terminal||NAD(P)-binding domain
AFLA_016340	48.94565545	1.758005085	4.7992	4.15E-05	0.00066313	-	Hydrophobin
AFLA_016530	44.92632273	125.8295233	-1.4858	0.0048439	0.03015	-	Galactose-binding domain-like||Glycoside hydrolase, family 2/20, immunoglobulin-like beta-sandwich domain||Galactose mutarotase-like domain||Glycoside hydrolase family 2, catalytic domain||Glycoside hydrolase-type carbohydrate-binding||Glycoside hydrolase superfamily||Glycoside hydrolase, family 2, active site||Glycoside hydrolase, family 2||Glycosyl hydrolases family 2, sugar binding domain||Bet…
AFLA_016550	89.20607175	23.65109149	1.9152	0.0011471	0.010039	-//-
AFLA_016570	29.13976365	233.0408201	-2.9995	1.39E-08	6.58E-07	-	Alpha/beta hydrolase fold-1||Alpha/Beta hydrolase fold
AFLA_016580	148.0258831	2.711126259	5.7708	1.07E-15	1.79E-13	-//-
AFLA_016590	42.68158538	5.244400635	3.0248	0.00016659	0.0021061	-//-
AFLA_016600	324.319176	41.86826024	2.9535	5.60E-09	2.89E-07	-	Isopenicillin N synthase-like||Aldolase-type TIM barrel||Oxoglutarate/iron-dependent dioxygenase||NADH:flavin oxidoreductase/NADH oxidase, N-terminal
AFLA_016620	339.907822	49.07088499	2.7922	0.0090052	0.048198	-	Aminoacyl-tRNA synthetase, class I, conserved site||Rossmann-like alpha/beta/alpha sandwich fold||Tryptophan-tRNA ligase||Aminoacyl-tRNA synthetase, class Ic
AFLA_016710	12.78775758	0.451854376	4.8228	0.0055411	0.033546	-//-
AFLA_016820	178.7748653	536.7897789	-1.5862	0.00058578	0.0058893	-	Mitochondrial carrier domain||Mitochondrial substrate/solute carrier||Mitochondrial carrier protein
AFLA_016830	2916.116916	1167.91378	1.3201	0.0022905	0.017144	-	Tubulin/FtsZ, GTPase domain||Tubulin, C-terminal||Tubulin/FtsZ, C-terminal||Tubulin/FtsZ, 2-layer sandwich domain||Tubulin||Alpha tubulin||Tubulin, conserved site
AFLA_016970	11.05325499	216.1063568	-4.2892	3.49E-08	1.43E-06	-	Rad21/Rec8-like protein, N-terminal
AFLA_017030	21.72101859	66.59490724	-1.6163	0.0087152	0.046925	-//-
AFLA_017040	40.53814892	109.0698499	-1.4279	0.0082024	0.044994	-	Fungal transcription factor
AFLA_017050	2.153892952	31.2581621	-3.8592	0.003174	0.021964	-	Major facilitator, sugar transporter-like||Sugar/inositol transporter||Sugar transporter, conserved site||Major facilitator superfamily domain
AFLA_017100	624.7866467	1755.335338	-1.4903	0.0037552	0.024721	-	Beta-galactosidase, domain 2||Beta-galactosidase, domain 3||Glycoside hydrolase, catalytic domain||Glycoside hydrolase superfamily||Glycoside hydrolase, family 35, conserved site||Glycoside hydrolase 35, catalytic domain||Galactose-binding domain-like||Beta-galactosidase jelly roll domain||Glycoside hydrolase, family 35
AFLA_017160	94.98582583	348.4298444	-1.8751	0.0032513	0.022327	-//-
AFLA_017390	434.500059	157.1647997	1.4671	0.00189	0.014734	-	Tetrapyrrole methylase||Diphthine synthase||Tetrapyrrole methylase, subdomain 1||Tetrapyrrole methylase, subdomain 2
AFLA_017410	288.0642314	3781.798244	-3.7146	0.00010137	0.0014077	-	FMN-binding split barrel
AFLA_017460	453.8681853	37.77240311	3.5869	3.75E-05	0.0006086	-	Alpha/Beta hydrolase fold||Alpha/beta hydrolase fold-1
AFLA_017480	266.16126	4789.218161	-4.1694	1.91E-18	4.53E-16	-	SUN family
AFLA_017620	14972.47057	5028.023968	1.5742	0.00019515	0.002401	-	Histone H4, conserved site||TATA box binding protein associated factor (TAF)||Histone-fold||Histone H4
AFLA_017630	5.261588056	30.9916898	-2.5583	0.0036779	0.024365	-//-
AFLA_017650	56.305854	1.256738287	5.4855	1.12E-08	5.40E-07	-//-
AFLA_017660	36.11853966	1.807417506	4.3207	1.26E-05	0.00024135	-//-
AFLA_017770	70.82605094	374.6928158	-2.4034	0.0053092	0.032452	-	D-isomer specific 2-hydroxyacid dehydrogenase, catalytic domain||NAD(P)-binding domain||D-isomer specific 2-hydroxyacid dehydrogenase, NAD-binding domain
AFLA_017800	427.6780388	119.0203581	1.8453	7.27E-05	0.001068	-	SH3 domain
AFLA_017850	108.7672185	1210.498846	-3.4763	7.40E-07	2.16E-05	-//-
AFLA_017860	601.1356011	2781.033828	-2.2099	1.79E-06	4.67E-05	-//-
AFLA_017910	13083.22363	3154.313794	2.0523	2.75E-06	6.80E-05	-	Transketolase family||Transketolase, N-terminal||Transketolase, bacterial-like||Thiamin diphosphate-binding fold||Transketolase binding site||Transketolase-like, pyrimidine-binding domain||Transketolase C-terminal/Pyruvate-ferredoxin oxidoreductase domain II||Transketolase, C-terminal domain
AFLA_017920	5398.897646	1312.243526	2.0406	2.94E-06	7.14E-05	-	Polyamine biosynthesis domain||S-adenosyl-L-methionine-dependent methyltransferase||Spermidine/spermine synthase, eukaryotes||Spermidine/spermine synthases||Polyamine biosynthesis domain, conserved site
AFLA_017950	2857.235217	1303.790356	1.1319	0.0069802	0.040019	-	Cytochrome b-c1 complex subunit 8
AFLA_017970	250.0051999	66.00992161	1.9212	0.000121	0.0016159	-	Putative SAM-dependent methyltransferase
AFLA_017990	543.8916055	167.9871154	1.695	0.00020838	0.0025281	-	Domain of unknown function DUF202
AFLA_018000	1003.047087	379.6661521	1.4016	0.001481	0.012205	-	Tubulin/FtsZ, GTPase domain||Tubulin, C-terminal||Gamma tubulin||Tubulin, conserved site||Tubulin/FtsZ, 2-layer sandwich domain||Tubulin||Tubulin/FtsZ, C-terminal
AFLA_018010	537.4995067	197.0749681	1.4475	0.0012727	0.010865	-//-
AFLA_018070	24.71369225	131.0558863	-2.4068	2.23E-05	0.00039679	-	Major facilitator superfamily domain||Major facilitator superfamily
AFLA_018080	392.8106972	6135.510829	-3.9653	0.00068917	0.0066982	-	Solute carrier family 35 member F3/F4||Mannosyl phosphorylinositol ceramide synthase regulatory protein Csg2
AFLA_018200	330.4019322	67.43006244	2.2928	2.86E-06	7.00E-05	-//-
AFLA_018220	552.2114679	175.0038656	1.6578	0.00028359	0.0032787	-	Fungal transcription factor
AFLA_018230	75.77208327	20.97219481	1.8532	0.0039694	0.025806	-	Short-chain dehydrogenase/reductase SDR||NAD(P)-binding domain
AFLA_018240	2389.197004	68.18024474	5.131	1.88E-12	1.89E-10	-	Purine-cytosine permease||Nucleobase cation symporter-1, NCS1
AFLA_018250	653.1726528	1573.648652	-1.2686	0.0028565	0.02027	-	Nucleolar 27S pre-rRNA processing, Urb2/Npa2, C-terminal
AFLA_018260	670.1388176	237.4110674	1.4971	0.00083023	0.0078054	-	Protein of unknown function DUF543
AFLA_018290	177.1312241	613.5656137	-1.7924	0.0016176	0.013006	-	S-adenosyl-L-methionine-dependent methyltransferase
AFLA_018330	14.57347804	77.65227286	-2.4137	0.0018507	0.014518	-//-
AFLA_018360	97.68344797	367.3005367	-1.9108	0.0023927	0.017746	-	AMP-binding, conserved site||AMP-binding enzyme C-terminal domain||AMP-dependent synthetase/ligase
AFLA_018450	778.3720185	254.7435043	1.6114	0.00032061	0.0036039	-	Uncharacterised domain, di-copper centre||Tyrosinase copper-binding domain
AFLA_018470	54.24900351	16.004366	1.7611	0.0077516	0.043218	-//-
AFLA_018540	456.8849042	1354.981355	-1.5684	0.00038747	0.0041905	-	P-loop containing nucleoside triphosphate hydrolase||G protein alpha subunit, helical insertion||Fungal G-protein, alpha subunit||Guanine nucleotide binding protein (G-protein), alpha subunit
AFLA_018560	264.5530892	1161.334378	-2.1342	1.45E-06	3.86E-05	-	ABC transporter-like||P-loop containing nucleoside triphosphate hydrolase||ABC transporter type 1, transmembrane domain||Peroxisomal long-chain fatty acid import protein 1||AAA+ ATPase domain
AFLA_018590	178.0652396	14.53050856	3.6152	3.67E-08	1.48E-06	-	Aminotransferase, class I/classII||Pyridoxal phosphate-dependent transferase||Pyridoxal phosphate-dependent transferase, major region, subdomain 1||Pyridoxal phosphate-dependent transferase, major region, subdomain 2
AFLA_018600	61.00892771	7.481364652	3.0276	2.97E-05	0.00050069	-	Oxidoreductase, molybdopterin-binding domain||Moybdenum cofactor oxidoreductase, dimerisation||Eukaryotic molybdopterin oxidoreductase||Immunoglobulin E-set
AFLA_018650	0.557854268	11.28866505	-4.3388	0.0083557	0.045595	-	YjgF/YER057c/UK114 family||Endoribonuclease L-PSP/chorismate mutase-like
AFLA_018670	606.4692138	2737.079183	-2.1741	1.02E-06	2.83E-05	-	Leucine-rich repeat domain, L domain-like
AFLA_018700	9710.799969	3342.009678	1.5389	0.00022623	0.0027206	-	Ribosomal protein L5 eukaryotic/L18 archaeal||Ribosomal protein L5 eukaryotic/L18 archaeal, C-terminal
AFLA_018740	68.29125932	2329.701242	-5.0923	0.0020407	0.015695	-	Mg2+ transporter protein, CorA-like/Zinc transport protein ZntB
AFLA_018800	380.3309537	58.47986047	2.7012	0.0046357	0.02907	-	Nitrite/sulphite reductase 4Fe-4S domain||Nitrite/Sulfite reductase ferredoxin-like domain||Rieske [2Fe-2S] iron-sulphur domain||FAD/NAD(P)-binding domain||Nitrite/sulphite reductase iron-sulphur/sirohaem-binding site||Nitrite reductase [NAD(P)H] small subunit, NirD||BFD-like [2Fe-2S]-binding domain
AFLA_018810	80.23492168	23.73993535	1.7569	0.0031203	0.0217	-	NADH:cytochrome b5 reductase (CBR)||Riboflavin synthase-like beta-barrel||Cytochrome b5-like heme/steroid binding domain||Cytochrome b5, heme-binding site||Oxidoreductase, FAD-binding domain||Immunoglobulin E-set||Flavoprotein pyridine nucleotide cytochrome reductase||Oxidoreductase, molybdopterin binding site||Ferredoxin reductase-type FAD-binding domain||Oxidoreductase FAD/NAD(P)-binding||Nitra…
AFLA_018910	24.39746794	0.854296332	4.8359	0.002614	0.019054	-	Peptidase S1A, chymotrypsin family||Peptidase S1, PA clan||Serine proteases, trypsin domain
AFLA_018920	46.14053435	1.708592664	4.7552	0.0008892	0.0082347	-//-
AFLA_018940	170.6259648	56.15623433	1.6033	0.0015206	0.012433	-	Carbohydrate kinase PfkB||Ribokinase-like
AFLA_019020	406.6793487	173.5009317	1.2289	0.0083343	0.045518	-	P-loop containing nucleoside triphosphate hydrolase||Protein KTI12/L-seryl-tRNA(Sec) kinase
AFLA_019060	140.5306871	44.15910504	1.6701	0.0019204	0.014934	-	P-loop containing nucleoside triphosphate hydrolase||ABC transporter-like||AAA+ ATPase domain||ABC transporter type 1, transmembrane domain||ABC transporter, conserved site
AFLA_019130	505.1554506	18367.66905	-5.1843	0.00030958	0.0034986	-	Caspase-like domain
AFLA_019180	25.05122983	0	Inf	5.31E-06	0.00011728	-	Protein of unknown function DUF3759
AFLA_019230	941.0355387	6802.870387	-2.8538	0.0027561	0.019758	-	CsbD-like
AFLA_019300	294.0330114	75.5161376	1.9611	0.0011577	0.010103	-//-
AFLA_019420	763.7041743	77.56849475	3.2995	1.53E-11	1.37E-09	-	Major facilitator superfamily domain||Major facilitator superfamily
AFLA_019430	1873.650632	285.2697888	2.7155	3.67E-09	1.97E-07	-	FAD-binding domain||FAD/NAD(P)-binding domain
AFLA_019440	1647.629712	143.437381	3.5219	9.86E-14	1.21E-11	-//-
AFLA_019460	39.37261717	6.871456195	2.5185	0.0020937	0.016043	-//-
AFLA_019520	3164.076576	514.5930703	2.6203	4.42E-09	2.35E-07	-	Ysc84 actin-binding domain||Zinc finger, Rad18-type putative
AFLA_019550	4.104053542	555.3701251	-7.0803	0.00014777	0.0019008	-	Major facilitator superfamily||Major facilitator superfamily domain
AFLA_019570	33.81245799	6.261547737	2.433	0.0053823	0.03276	-	Major facilitator superfamily domain||Sugar transporter, conserved site||Major facilitator superfamily
AFLA_019610	279.8285087	32.1493798	3.1217	0.0043901	0.027963	-	Alpha/Beta hydrolase fold||Peptidase S10, serine carboxypeptidase||Serine carboxypeptidases, histidine active site
AFLA_019800	2330.54676	8838.647443	-1.9232	0.0084188	0.045761	-	Alkaline-phosphatase-like, core domain||Alkaline phosphatase||Alkaline phosphatase-like, alpha/beta/alpha
AFLA_019820	1097.945324	304.8642924	1.8486	3.81E-05	0.00061844	-	Mini-chromosome maintenance protein||MCM domain||Mini-chromosome maintenance, conserved site||MCM OB domain||DNA replication licensing factor Mcm2||P-loop containing nucleoside triphosphate hydrolase||MCM N-terminal domain||Nucleic acid-binding, OB-fold
AFLA_019850	14.82949288	101.7930085	-2.7791	0.0038504	0.025197	-	Alpha/Beta hydrolase fold
AFLA_020010	76.02255159	877.3580407	-3.5287	0.00032409	0.0036203	-//-
AFLA_020020	89.38889538	757.5589311	-3.0832	1.40E-06	3.75E-05	-//-
AFLA_020030	0.296776205	67.83234022	-7.8365	2.72E-13	3.05E-11	-//-
AFLA_020060	86.16971122	18.37473034	2.2295	0.00037865	0.0041127	-	Transcription factor domain, fungi
AFLA_020140	1005.633482	404.2654156	1.3147	0.0027212	0.01962	-	NADH:ubiquinone oxidoreductase, B18 subunit
AFLA_020150	1862.929395	846.5853613	1.1378	0.00881	0.047314	-	Glutamate-cysteine ligase catalytic subunit
AFLA_020210	1001.497348	3273.531942	-1.7087	0.0029374	0.020669	-	Zinc finger, GATA-type||Zinc finger, NHR/GATA-type
AFLA_020240	111.707795	18.34980751	2.6059	1.00E-05	0.00020039	-	Mitochondrial matrix Mmp37
AFLA_020270	89.58610816	1556.842303	-4.1192	3.58E-07	1.18E-05	-//-
AFLA_020280	2662.027782	1176.476341	1.1781	0.0064168	0.037402	-	Glycolipid transfer protein domain
AFLA_020290	254.5435566	1139.221485	-2.1621	1.07E-05	0.00021088	-	Sporulation-specific protein 71, N-terminal domain||Pleckstrin homology domain||PH domain-like
AFLA_020330	143.2553373	48.03032647	1.5766	0.0029923	0.020973	-	Centromere subunit L
AFLA_020360	1129.823586	419.341485	1.4299	0.0015785	0.01279	-	Polycystin cation channel, PKD1/PKD2
AFLA_020370	370.9458831	156.5576248	1.2445	0.0083056	0.04542	-	Macro domain
AFLA_020380	312.6821524	7724.521909	-4.6267	0.0016815	0.013383	-	Stomatin family||Band 7 domain
AFLA_020500	239.9777289	48.36405071	2.3109	6.44E-06	0.00013771	-	P-loop containing nucleoside triphosphate hydrolase||Small GTPase superfamily
AFLA_020590	281.4505619	963.5662273	-1.7755	4.61E-05	0.00072519	-	Galactose mutarotase-like domain||Glycoside hydrolase-type carbohydrate-binding||Aldose 1-/Glucose-6-phosphate 1-epimerase
AFLA_020620	424.0023183	153.6832145	1.4641	0.0015696	0.012751	-	Protein kinase domain||Protein kinase-like domain
AFLA_020630	26.46264996	80.38325619	-1.6029	0.008022	0.044313	-	Glycoside hydrolase superfamily||Glucanosyltransferase||Glycoside hydrolase, catalytic domain
AFLA_020660	383.299561	1060.22883	-1.4678	0.00084193	0.0078959	-//-
AFLA_020670	2243.778026	5586.343784	-1.316	0.0023522	0.017491	-//-
AFLA_020730	1164.684868	345.7785175	1.752	7.45E-05	0.0010882	-	Zinc finger, PARP-type
AFLA_020840	1353.732324	569.8955515	1.2482	0.0033552	0.022804	-	Ubiquitin-conjugating enzyme E2||Ubiquitin-conjugating enzyme/RWD-like
AFLA_020910	201.3888037	52.05501509	1.9519	0.00020258	0.0024741	-	Zn(2)-C6 fungal-type DNA-binding domain||Transcription factor domain, fungi
AFLA_020930	45.8934409	274.2015914	-2.5789	0.00019464	0.0023981	-	Protein of unknown function DUF3292
AFLA_020940	57.15662632	361.8250386	-2.6623	0.0022429	0.016897	-	Protein of unknown function DUF3292
AFLA_021080	7879.692861	3375.262921	1.2231	0.0036873	0.024402	-	Ribosomal protein S30
AFLA_021150	207.4250473	77.91116935	1.4127	0.0042686	0.027355	-//-
AFLA_021240	951.7491782	2456.574927	-1.368	0.0015443	0.012602	-	Myc-type, basic helix-loop-helix (bHLH) domain
AFLA_021250	2389.741673	1019.279695	1.2293	0.0033357	0.022696	-	Mitochondrial carrier protein||Mitochondrial substrate/solute carrier||Mitochondrial carrier domain
AFLA_021300	30.07478202	2.16044704	3.7992	0.00019162	0.0023656	-	Argonaute, linker 1 domain||Protein argonaute, N-terminal||Piwi domain||Ribonuclease H-like domain||PAZ domain
AFLA_021350	212.5462361	526.1231917	-1.3076	0.0032152	0.022201	-	Cys/Met metabolism, pyridoxal phosphate-dependent enzyme||Pyridoxal phosphate-dependent transferase, major region, subdomain 2||Pyridoxal phosphate-dependent transferase||Pyridoxal phosphate-dependent transferase, major region, subdomain 1
AFLA_021370	294.8798874	32.75416324	3.1704	1.56E-09	9.15E-08	-	Hexapeptide transferase, conserved site||Hexapeptide repeat||Maltose/galactoside acetyltransferase||Trimeric LpxA-like
AFLA_021390	3387.077305	212.1990687	3.9966	0.0034044	0.023064	-	Aconitase/3-isopropylmalate dehydratase, swivel||Dihydroxy-acid/6-phosphogluconate dehydratase, conserved site||Dihydroxy-acid dehydratase||Dihydroxy-acid/6-phosphogluconate dehydratase
AFLA_021400	93.55568363	11.16240732	3.0672	1.88E-06	4.85E-05	-	Phthalate dioxygenase reductase||Molybdenum cofactor sulfurase, C-terminal||Riboflavin synthase-like beta-barrel||Pyruvate kinase-like, insert domain||2Fe-2S ferredoxin, iron-sulphur binding site||3-alpha domain||2Fe-2S ferredoxin-type iron-sulfur binding domain||Ferredoxin reductase-type FAD-binding domain||Molybdenum cofactor sulfurase, C-terminal-like||Beta-grasp domain
AFLA_021460	76.19206773	6039.802824	-6.3087	0.0031645	0.021911	-	Aminotransferase, class I/classII||Aminotransferases, class-I, pyridoxal-phosphate-binding site||Tetratricopeptide-like helical domain||Tetratricopeptide repeat-containing domain||Pyridoxal phosphate-dependent transferase, major region, subdomain 1||Pyridoxal phosphate-dependent transferase||Aspartate/other aminotransferase||Phosphate transporter
AFLA_021510	809.2578292	1849.414171	-1.1924	0.0066957	0.038654	-//-
AFLA_021580	566.5757798	167.2317489	1.7604	0.00013716	0.0017752	-	Tctex-1
AFLA_021590	1193.547893	257.4529753	2.2129	1.06E-06	2.94E-05	-	Domain of unknown function DUF202
AFLA_021640	139.4311456	52.11942862	1.4197	0.0081273	0.044792	-//-
AFLA_021690	692.3741441	261.2691804	1.406	0.001507	0.012354	-	Metallo-dependent phosphatase-like||Vacuolar protein sorting-associated protein 29, Vps29||Phosphodiesterase MJ0936/Vps29||Calcineurin-like phosphoesterase domain, lpxH type
AFLA_021770	188.0053985	0.903708753	7.7007	1.37E-07	4.91E-06	-	Sterol methyltransferase C-terminal||SAM-dependent methyltransferase SMT-type||Methyltransferase domain||S-adenosyl-L-methionine-dependent methyltransferase
AFLA_021840	302.7545301	90.79678284	1.7374	0.00032165	0.0036069	-	Diphthamide synthesis DPH1/DPH2||Diphthamide synthesis DHP2, eukaryotic
AFLA_021900	176.0750309	53.6968027	1.7133	0.00086836	0.0080775	-	Autophagy-related protein 5
AFLA_021960	5911.552302	2156.164368	1.4551	0.00051247	0.0053094	-	Pyruvate dehydrogenase (acetyl-transferring) E1 component, alpha subunit, subgroup y||Dehydrogenase, E1 component||Thiamin diphosphate-binding fold
AFLA_022160	229.8181283	519.0193005	-1.1753	0.0083006	0.04542	-	Cation/H+ exchanger
AFLA_022170	887.5497082	344.5369784	1.3652	0.0023443	0.017453	-	Ribonuclease H-like domain||Ribonuclease H domain||Ribosomal protein L9/RNase H1, N-terminal||Ribonuclease H1, N-terminal
AFLA_022180	335.8319143	97.51090089	1.7841	0.00016951	0.0021388	-	Ankyrin repeat||Protein kinase-like domain||Ankyrin repeat-containing domain
AFLA_022190	226.918111	59.59834248	1.9288	0.0001149	0.0015427	-//-
AFLA_022240	44.78785882	324.2065157	-2.8557	8.47E-06	0.00017338	-	Frag1/DRAM/Sfk1
AFLA_022250	1866.442032	859.7722055	1.1183	0.0079035	0.043851	-	CYTH domain||SPX domain||VTC domain||Domain of unknown function DUF202
AFLA_022300	933.6490148	379.2776077	1.2996	0.0034887	0.023533	-	WD40/YVTN repeat-like-containing domain||WD40-repeat-containing domain||WD40 repeat||WD40 repeat, conserved site||Minichromosome loss protein Mcl1, middle region
AFLA_022340	1878.733985	74.87679234	4.6491	4.20E-18	9.44E-16	-	Glutamate synthase, eukaryotic||Aldolase-type TIM barrel||Glutamine amidotransferase type 2 domain||Nucleophile aminohydrolases, N-terminal||Glutamate synthase domain||Glutamate synthase, central-N||Glutamate synthase, alpha subunit, C-terminal||FAD/NAD(P)-binding domain||Glutamate synthase, NADH/NADPH, small subunit 1||Dihydroprymidine dehydrogenase domain II||NAD(P)-binding domain||Alpha-helica…
AFLA_022450	106.2349521	789.8847356	-2.8944	5.67E-10	3.77E-08	-	CID domain||Subunit of cleavage factor IA Pcf11||ENTH/VHS
AFLA_022470	3301.75083	1477.419742	1.1602	0.0055435	0.033546	-	P-loop containing nucleoside triphosphate hydrolase||Adenylate kinase, active site lid domain||Adenylate kinase, conserved site||Adenylate kinase subfamily||Adenylate kinase 2||Adenylate kinase/UMP-CMP kinase
AFLA_022490	84.84168323	29.53485103	1.5224	0.0069924	0.040052	-	Zinc finger, SWIM-type
AFLA_022550	396.7230185	167.8517432	1.2409	0.0083341	0.045518	-	Ribonuclease HII, helix-loop-helix cap domain||Ribonuclease H-like domain||Ribonuclease HII/HIII domain||Ribonuclease HII/HIII
AFLA_022620	544.3244225	1212.849673	-1.1559	0.0075029	0.042301	-	Choline transporter-like
AFLA_022650	1273.123481	3255.779803	-1.3546	0.0016095	0.012957	-	Sugar transporter, conserved site||Major facilitator superfamily domain||Major facilitator, sugar transporter-like||Sugar/inositol transporter
AFLA_022680	83.67662198	421.1852218	-2.3316	0.00018298	0.0022767	-	Peptidase M43, pregnancy-associated plasma-A||Metallopeptidase, catalytic domain
AFLA_022690	1642.582834	4894.90605	-1.5753	0.00032167	0.0036069	-	CDC50/LEM3 family
AFLA_022700	311.3642381	934.6033612	-1.5858	0.00035849	0.0039312	-	Homeodomain-like||SWIRM domain
AFLA_022830	163.144881	57.81111038	1.4967	0.0026499	0.019261	-//-
AFLA_022880	1081.912894	86.63973818	3.6424	1.94E-06	5.00E-05	-	Major facilitator superfamily domain||Proton-dependent oligopeptide transporter family
AFLA_023000	99.53157736	8187.029977	-6.362	2.60E-14	3.55E-12	-	Ankyrin repeat||Ankyrin repeat-containing domain
AFLA_023010	86.60395696	53919.24411	-9.2822	1.33E-06	3.59E-05	-//-
AFLA_023020	0.501243137	89307.97639	-17.443	9.04E-10	5.68E-08	-	Phosphopantetheine binding ACP domain||Phosphopantetheine attachment site||NAD(P)-binding domain||AMP-binding, conserved site||AMP-dependent synthetase/ligase||Male sterility, NAD-binding||Thioester reductase-like domain||AMP-binding enzyme C-terminal domain||Amino acid adenylation domain||Polyketide synthase, phosphopantetheine-binding domain
AFLA_023030	9.763714435	66244.96916	-12.728	2.90E-09	1.60E-07	-	Cytochrome P450||Cytochrome P450, conserved site||Cytochrome P450, E-class, group I
AFLA_023040	430.4816632	9347.021668	-4.4405	0.001248	0.010691	-	Transcription factor domain, fungi||Zn(2)-C6 fungal-type DNA-binding domain
AFLA_023050	74.86803411	51487.5448	-9.4257	1.30E-05	0.00024857	-	Major facilitator superfamily||Major facilitator superfamily domain
AFLA_023090	117.5953739	514.9348223	-2.1306	6.23E-06	0.00013369	-//-
AFLA_023110	285.53943	73.22236316	1.9633	4.45E-05	0.00070487	-//-
AFLA_023260	583.2014878	2676.012535	-2.198	6.27E-05	0.00094143	-	Transcription factor domain, fungi
AFLA_023270	94.72521827	454.3469279	-2.262	0.0051966	0.031935	-	Major facilitator superfamily domain||Major facilitator superfamily
AFLA_023290	702.6363594	68.27425924	3.3634	1.68E-09	9.67E-08	-	Amino acid/polyamine transporter I
AFLA_023320	158.2208391	51.84291606	1.6097	0.002431	0.017934	-	FKBP-type peptidyl-prolyl cis-trans isomerase domain||Peptidyl-prolyl cis-trans isomerase, FKBP-type
AFLA_023390	9.43450414	1367.114047	-7.179	1.74E-08	7.80E-07	-	Cutinase, monofunctional||Cutinase/acetylxylan esterase||Alpha/Beta hydrolase fold
AFLA_023400	114.1703239	561.6308832	-2.2984	8.27E-07	2.38E-05	-	Major facilitator superfamily domain||Major facilitator superfamily
AFLA_023410	5.587934569	50.84278764	-3.1857	3.85E-05	0.00062169	-	Peptidase C45
AFLA_023420	180.9554562	1702.106866	-3.2336	0.00055	0.0056239	-	Transcription factor domain, fungi
AFLA_023440	42.80772339	159.7113404	-1.8995	0.00023171	0.0027654	-	Acyltransferase 3
AFLA_023450	19.58370996	71.76087823	-1.8735	0.0042596	0.02733	-//-
AFLA_023460	1803.675654	467.2901134	1.9485	0.0064643	0.037591	-	Starch synthase, catalytic domain||Glycoside hydrolase superfamily||Glycoside hydrolase, catalytic domain||Glycosyl hydrolase, family 13, catalytic domain
AFLA_023490	537.3953314	110.4043136	2.2832	0.0013858	0.01161	-	Glycoside hydrolase, family 13||Glycoside hydrolase, catalytic domain||Alpha-amylase, thermostable||Glycosyl hydrolase, family 13, catalytic domain||Glycosyl hydrolase, all-beta||Glycoside hydrolase superfamily
AFLA_023500	2132.285243	217.3366928	3.2944	0.0042625	0.02733	-	Kre9/Knh1 family
AFLA_023510	73.09570416	343.6888669	-2.2332	8.86E-05	0.0012562	-	NAD(P)-binding domain||NAD-dependent epimerase/dehydratase, N-terminal domain
AFLA_023600	6067.923947	1093.992174	2.4716	0.0023306	0.017391	-//-
AFLA_023910	20.42249068	437.3394258	-4.4205	3.97E-10	2.79E-08	-//-
AFLA_023950	4.932707798	30.14955618	-2.6117	0.0032266	0.022231	-	Glycine-rich domain-containing protein-like
AFLA_023970	0.557854268	24.71514095	-5.4694	1.41E-05	0.00026622	-	Transcription factor domain, fungi||Zn(2)-C6 fungal-type DNA-binding domain
AFLA_024030	75.45186033	14.67841749	2.3619	0.0002113	0.0025582	-	HAD-like domain
AFLA_024140	20.75423046	0.854296332	4.6025	0.00053881	0.005523	-	Luciferase-like domain||Nitrilotriacetate monooxygenase component A/pristinamycin IIA synthase subunit A
AFLA_024210	24.69204469	1.659180243	3.8955	0.00059609	0.0059548	-	Cytochrome P450, conserved site||Cytochrome P450, E-class, group IV||Cytochrome P450
AFLA_024260	50.50992438	1359.178548	-4.75	4.58E-07	1.46E-05	-	Glycosyl hydrolases family 2, sugar binding domain||Glycoside hydrolase, catalytic domain||Exo-beta-D-glucosaminidase||Glycoside hydrolase, family 2, immunoglobulin-like beta-sandwich||Glycoside hydrolase superfamily||Glycoside hydrolase, family 2/20, immunoglobulin-like beta-sandwich domain||Galactose-binding domain-like
AFLA_024300	77.90752249	20.81387167	1.9042	0.0018698	0.014622	-	Amidase signature domain||Amidase
AFLA_024380	244.9282261	57.82222882	2.0827	2.80E-05	0.00047768	-	Amidase, conserved site||Amidase||Amidase signature domain
AFLA_024750	971.4983903	187.7282903	2.3716	3.21E-07	1.06E-05	-	Cytochrome P450, E-class, group I||Cytochrome P450
AFLA_024760	5506.001135	568.9288588	3.2747	1.44E-12	1.48E-10	-	LysM domain
AFLA_024770	1832.146908	414.0680215	2.1456	1.96E-06	5.04E-05	-	Glycoside hydrolase family 18, catalytic domain||Glycoside hydrolase, catalytic domain||Glycoside hydrolase, chitinase active site||Chitinase insertion domain||Glycoside hydrolase superfamily||Chitinase II
AFLA_024780	2339.078427	682.5817136	1.7769	0.0028947	0.020471	-//-
AFLA_024920	1529.890304	583.0088711	1.3918	0.0014692	0.012131	-	Calcium permeable stress-gated cation channel 1, N-terminal transmembrane domain||10TM putative phosphate transporter, extracellular tail||Calcium-dependent channel, 7TM region, putative phosphate||10TM putative phosphate transporter, cytosolic domain
AFLA_024930	404.2231373	1246.496058	-1.6247	0.00025454	0.0029867	-	Glycoside hydrolase superfamily||MINDY deubiquitinase domain||Immunoglobulin E-set||Carbohydrate binding X2 domain||Protein of unknown function DUF544||Immunoglobulin-like fold||Glycoside hydrolase, family 5||Glycoside hydrolase, catalytic domain
AFLA_024980	9.951597037	0	Inf	0.0067135	0.038719	-//-
AFLA_025130	2663.081914	27422.37801	-3.3642	1.29E-13	1.53E-11	-	Blastomyces yeast-phase-specific protein
AFLA_025170	823.4914956	1908.296631	-1.2125	0.0052008	0.031945	-	Peptidase M16 domain||Metalloenzyme, LuxS/M16 peptidase-like||Peptidase M16, N-terminal||Peptidase M16, C-terminal||Peptidase M16, middle/third domain
AFLA_025250	22.07840455	228.9458177	-3.3743	4.45E-10	3.02E-08	-	Glutathione-dependent formaldehyde-activating enzyme/centromere protein V||Mss4-like
AFLA_025260	64.3560448	230.8235829	-1.8426	0.00015902	0.0020268	-//-
AFLA_025330	1884.736099	283.6642932	2.7321	9.85E-06	0.0001983	-//-
AFLA_025440	102.4124979	251.4105186	-1.2957	0.0062278	0.036504	-	Six-hairpin glycosidase-like||Bacterial alpha-L-rhamnosidase
AFLA_025510	67.09230336	253.9290746	-1.9202	8.78E-05	0.0012486	-//-
AFLA_025540	3.724689988	46.00824061	-3.6267	0.0060523	0.035728	-	ATP-grasp fold, subdomain 2||ATP-grasp fold
AFLA_025570	34.02452189	115.7942773	-1.7669	0.0013922	0.011648	-	Major facilitator superfamily domain||Sugar/inositol transporter||Major facilitator, sugar transporter-like
AFLA_025590	1389.554343	425.148919	1.7086	0.00010705	0.0014639	-	Arrestin C-terminal-like domain||Arrestin-like, N-terminal||Immunoglobulin E-set
AFLA_025640	53.9554871	6.851658393	2.9772	9.49E-05	0.0013335	-//-
AFLA_025650	300.8437555	90.22379576	1.7374	0.0078706	0.043708	-//-
AFLA_025690	285.9343495	2.661713838	6.7472	6.86E-10	4.49E-08	-//-
AFLA_025720	1207.137371	290.1591782	2.0567	0.0054848	0.033314	-	Fungal transcription factor||Zn(2)-C6 fungal-type DNA-binding domain
AFLA_025750	2336.350896	1039.581774	1.1683	0.0060967	0.03592	-	Chaperone tailless complex polypeptide 1 (TCP-1)||Chaperonin TCP-1, conserved site||Chaperonin Cpn60/TCP-1 family||TCP-1-like chaperonin intermediate domain||GroEL-like apical domain||GroEL-like equatorial domain||T-complex protein 1, theta subunit
AFLA_025780	71.56313475	207.2700739	-1.5342	0.0020136	0.015525	-	Velvet factor
AFLA_025790	78.27110651	201.9888112	-1.3677	0.0062225	0.036504	-//-
AFLA_025860	3595.758434	1439.263964	1.321	0.0018305	0.014404	-	Transcription factor domain, fungi
AFLA_025940	264.6013071	100.9693118	1.3899	0.0040314	0.026128	-	Protein kinase-like domain
AFLA_025980	1385.618579	561.389384	1.3035	0.0035937	0.024004	-	Cdc37, C-terminal||Cdc37, N-terminal domain||Cdc37, Hsp90 binding||Cdc37
AFLA_026050	73.6380387	11.7797867	2.6441	7.45E-05	0.0010882	-//-
AFLA_026060	105.9442335	24.79651388	2.0951	0.00032284	0.0036157	-	Amino acid/polyamine transporter I
AFLA_026100	148.9969382	431.323559	-1.5335	0.0073944	0.041769	-	Homeodomain-like||Homeobox KN domain||Homeobox domain
AFLA_026140	12.74560157	661.6100814	-5.6979	1.59E-20	4.98E-18	-	Glycosyl hydrolase, family 13, catalytic domain||Alpha amylase||Glycoside hydrolase, family 13||Glycoside hydrolase, catalytic domain||Glycoside hydrolase superfamily||Alpha-amylase, domain of unknown function DUF1966, C-terminal||Glycosyl hydrolase, all-beta
AFLA_026200	55.53494571	240.6782942	-2.1156	0.0020402	0.015695	-	Oxidoreductase, N-terminal||NAD(P)-binding domain
AFLA_026240	846.9232996	3479.812874	-2.0387	4.23E-06	9.80E-05	-	P-type ATPase, C-terminal||P-type ATPase, cytoplasmic domain N||HAD-like domain||P-type ATPase, A domain||P-type ATPase, phosphorylation site||P-type ATPase, N-terminal||P-type ATPase||P-type ATPase, subfamily IV
AFLA_026260	892.1122122	294.8145059	1.5974	0.00026793	0.0031293	-	LSM domain, eukaryotic/archaea-type||Like-Sm (LSM) domain containing protein, LSm4/SmD1/SmD3||LSM domain
AFLA_026330	673.8201678	138.6519909	2.2809	6.94E-07	2.05E-05	-	Protein farnesyltransferase subunit beta||PFTB repeat||Terpenoid cyclases/protein prenyltransferase alpha-alpha toroid
AFLA_026370	16.34441335	90.07164191	-2.4623	6.44E-05	0.00095936	-//-
AFLA_026410	275.9238651	789.7630718	-1.5171	0.0013366	0.011326	-	Zinc finger C2H2-type/integrase DNA-binding domain||Zinc finger, C2H2-like||Zinc finger, C2H2
AFLA_026450	505.670889	1415.547464	-1.4851	0.00061965	0.0061316	-	Aspartic peptidase domain||Peptidase family A1 domain
AFLA_026470	3047.673962	1312.843065	1.215	0.0028172	0.020093	-	Pyridoxal phosphate-dependent transferase, major region, subdomain 1||Pyridoxal phosphate-dependent transferase||Aspartate/other aminotransferase||Aminotransferases, class-I, pyridoxal-phosphate-binding site||Aminotransferase, class I/classII
AFLA_026570	221.1744639	73.10892482	1.5971	0.00084539	0.0079107	-	Protein kinase A anchor protein, nuclear localisation signal domain
AFLA_026640	573.4093125	253.2981599	1.1787	0.0086162	0.046554	-	Protein prenyltransferase, alpha subunit||Geranylgeranyl transferase type-2 subunit alpha
AFLA_026670	105.2966037	37.71256283	1.4813	0.0087424	0.047011	-	Chromosome transmission fidelity protein 8
AFLA_026690	503.9406043	191.2945017	1.3975	0.0020277	0.015614	-	Chromo domain-like||RNA binding activity-knot of a chromodomain||MRG domain||MRG
AFLA_026780	947.9867226	310.569931	1.6099	0.00030667	0.0034814	-//-
AFLA_026850	102.0328043	29.4925812	1.7906	0.0014228	0.011826	-	High mobility group box domain
AFLA_026950	758.1516206	2141.723445	-1.4982	0.00066484	0.006507	-	Thiolase, acyl-enzyme intermediate active site||Thiolase, active site||Thiolase, C-terminal||Thiolase, N-terminal||Thiolase, conserved site||Thiolase-like||Thiolase
AFLA_027020	979.5050371	277.6644094	1.8187	5.61E-05	0.00085903	-	SET domain
AFLA_027110	224.5293844	2120.717878	-3.2396	1.11E-09	6.79E-08	-	C2 domain
AFLA_027130	205.2624268	644.4814061	-1.6507	0.0057566	0.03436	-	UmuC domain||DNA polymerase, Y-family, little finger domain
AFLA_027140	2691.61838	11165.28993	-2.0525	0.0010883	0.0096707	-	Metallopeptidase, catalytic domain||Disintegrin domain||Peptidase M12B, ADAM/reprolysin
AFLA_027160	581.0262115	182.6865731	1.6692	0.0002915	0.0033485	-	AAA+ ATPase domain||Zinc finger, Rad18-type putative||MgsA AAA+ ATPase C-terminal||AAA ATPase, C-terminal domain||ATPase, AAA-type, core||DNA polymerase III, clamp loader complex, gamma/delta/delta subunit, C-terminal||P-loop containing nucleoside triphosphate hydrolase
AFLA_027170	1667.498696	712.5572978	1.2266	0.0045616	0.028778	-	Pyridoxal phosphate-dependent transferase||Pyridoxal phosphate-dependent transferase, major region, subdomain 1||Pyridoxal phosphate-dependent transferase, major region, subdomain 2||Aminotransferase, class I/classII
AFLA_027200	1211.595433	3249.451727	-1.4233	0.00093338	0.0085539	-	Molybdopterin dehydrogenase, FAD-binding||FAD-binding, type 2, subdomain 1||Aldehyde oxidase/xanthine dehydrogenase, molybdopterin binding||FAD-binding, type 2||Aldehyde oxidase/xanthine dehydrogenase, a/b hammerhead||Aldehyde oxidase/xanthine dehydrogenase||CO dehydrogenase flavoprotein-like, FAD-binding, subdomain 2||CO dehydrogenase flavoprotein, C-terminal
AFLA_027250	651.3166582	213.6886568	1.6078	0.00025064	0.0029492	-	Aldo/keto reductase/potassium channel subunit beta||NADP-dependent oxidoreductase domain
AFLA_027350	2804.571724	1180.821073	1.248	0.003124	0.021714	-	NAD(P)-binding domain||Saccharopine dehydrogenase, C-terminal||Saccharopine dehydrogenase, NADP binding domain
AFLA_027400	138.5948326	579.4790702	-2.0639	6.47E-06	0.00013773	-	Major facilitator superfamily||Major facilitator superfamily domain
AFLA_027480	90.94916569	24.43885183	1.8959	0.0011196	0.0098528	-	Alpha/Beta hydrolase fold||Alpha/beta hydrolase fold-3
AFLA_027520	2751.13228	6426.319893	-1.224	0.0049599	0.03069	-	AAA+ ATPase domain||Peptidase, FtsH||ATPase, AAA-type, conserved site||Peptidase M41||ATPase, AAA-type, core||P-loop containing nucleoside triphosphate hydrolase
AFLA_027530	922.1412717	2870.361097	-1.6382	0.00015594	0.0019936	-	Carbohydrate kinase, FGGY, conserved site||Glycerol kinase||Carbohydrate kinase, FGGY, N-terminal||Carbohydrate kinase, FGGY||Carbohydrate kinase, FGGY, C-terminal
AFLA_027560	1620.953994	4382.60886	-1.4349	0.0090809	0.0485	-	Vacuolar protein sorting-associated protein 13||Vacuolar protein sorting-associated protein 13, second N-terminal domain||Vacuolar protein sorting-associated protein 13, N-terminal domain||Vacuolar protein sorting-associated protein 13, SHR-binding domain||VPS13, repeated coiled region||Vacuolar protein sorting-associated protein 13, C-terminal
AFLA_027600	29.76681475	4.918311489	2.5975	0.004581	0.028871	-	O-methyltransferase COMT-type||S-adenosyl-L-methionine-dependent methyltransferase||O-methyltransferase, family 2
AFLA_027620	123.250442	39.47040375	1.6427	0.0027413	0.019697	-	GINS complex, subunit Psf3||GINS complex
AFLA_027690	512.9113307	4206.66691	-3.0359	2.38E-11	2.05E-09	-	Leucine-rich repeat domain, L domain-like
AFLA_027700	30.56450406	202.776453	-2.73	2.37E-07	8.06E-06	-//-
AFLA_027730	3308.402556	830.6709676	1.9938	0.00072447	0.0069819	-	NADP-dependent oxidoreductase domain||Aldo/keto reductase/potassium channel subunit beta||Aldo/keto reductase, conserved site||Aldo/keto reductase
AFLA_027850	1000.813445	365.2699832	1.4541	0.0009364	0.0085646	-	D-isomer specific 2-hydroxyacid dehydrogenase, NAD-binding domain||NAD(P)-binding domain||D-isomer specific 2-hydroxyacid dehydrogenase, catalytic domain||D-isomer specific 2-hydroxyacid dehydrogenase, NAD-binding domain conserved site||D-isomer specific 2-hydroxyacid dehydrogenase, NAD-binding domain conserved site 1
AFLA_027940	294.0364608	84.89149064	1.7923	0.00016888	0.0021329	-	Caffeine-induced death protein 2||Uncharacterised conserved protein UCP022603
AFLA_027980	458.2063679	141.5355274	1.6948	0.0071121	0.040574	-	NUDIX hydrolase, conserved site||NUDIX hydrolase domain||NUDIX hydrolase domain-like||NUDIX hydrolase
AFLA_027990	30.30236139	2.16044704	3.81	0.00016565	0.0020964	-//-
AFLA_028010	8.867992552	76.69096483	-3.1124	0.00050772	0.0052671	-	Bacterial alpha-L-rhamnosidase||Six-hairpin glycosidase-like
AFLA_028090	159.3599858	3283.090515	-4.3647	0.00011054	0.0015018	-	Single hybrid motif||E3-binding domain||Biotin/lipoyl attachment||2-oxoacid dehydrogenase acyltransferase, catalytic domain||Chloramphenicol acetyltransferase-like domain||Lipoamide Acyltransferase
AFLA_028100	777.7222015	89.93544882	3.1123	1.03E-05	0.00020472	-	Alpha-hydroxy acid dehydrogenase, FMN-dependent||Aldolase-type TIM barrel||FMN-dependent alpha-hydroxy acid dehydrogenase, active site||FMN-dependent dehydrogenase
AFLA_028110	1448.830049	309.4934498	2.2269	0.0016329	0.013078	-	Vanillyl-alcohol oxidase, C-terminal subdomain 2||FAD linked oxidase, N-terminal||FAD-linked oxidase, C-terminal||CO dehydrogenase flavoprotein-like, FAD-binding, subdomain 2||FAD-linked oxidase-like, C-terminal||FAD-binding, type 2||FAD-binding, type 2, subdomain 1
AFLA_028130	25.66675983	230.8808402	-3.1692	2.48E-06	6.26E-05	-	Carbohydrate kinase, thermoresistant glucokinase||Shikimate kinase/gluconokinase||P-loop containing nucleoside triphosphate hydrolase
AFLA_028210	362.6588701	83.34787121	2.1214	1.09E-05	0.00021386	-	tRNA guanosine-2'-O-methyltransferase, TRM11||DNA methylase, N-6 adenine-specific, conserved site||S-adenosyl-L-methionine-dependent methyltransferase||Putative RNA methylase domain
AFLA_028250	543.3493369	1309.675275	-1.2693	0.0036519	0.024248	-	Zn(2)-C6 fungal-type DNA-binding domain||Transcription factor domain, fungi
AFLA_028310	1867.344876	181.03374	3.3667	1.13E-05	0.00022102	-	Globin/Protoglobin
AFLA_028320	179.3925202	513.5510394	-1.5174	0.00087964	0.0081703	-	Aldehyde dehydrogenase domain||Aldehyde dehydrogenase N-terminal domain||Aldehyde/histidinol dehydrogenase||Aldehyde dehydrogenase, C-terminal
AFLA_028370	170.2617994	42.61860671	1.9982	0.00011246	0.0015165	-	Survival protein SurE-like phosphatase/nucleotidase
AFLA_028430	1029.033288	2285.826346	-1.1514	0.007549	0.042467	-	Alpha/Beta hydrolase fold||Protein of unknown function DUF726
AFLA_028530	353.7642284	133.5266918	1.4057	0.0035935	0.024004	-	Prefoldin||Prefoldin beta-like||Prefoldin subunit 2
AFLA_028600	1799.061827	592.5490769	1.6022	0.00026293	0.0030766	-	DNA replication licensing factor Mcm3||Mini-chromosome maintenance protein||MCM domain||MCM OB domain||Mini-chromosome maintenance, conserved site||AAA+ ATPase domain||Nucleic acid-binding, OB-fold||MCM N-terminal domain||P-loop containing nucleoside triphosphate hydrolase
AFLA_028710	325.8678424	98.54457417	1.7254	0.0004897	0.0051029	-	Short-chain dehydrogenase/reductase SDR||NAD(P)-binding domain
AFLA_028780	490.5758297	49.65487197	3.3045	4.20E-11	3.40E-09	-	FAD dependent oxidoreductase||FAD/NAD(P)-binding domain
AFLA_028820	87.11885041	1297.71249	-3.8968	4.35E-15	6.91E-13	-//-
AFLA_028830	1297.388679	146784.329	-6.8219	4.27E-38	8.94E-35	-//-
AFLA_028840	27.56390338	250.2139965	-3.1823	0.0056986	0.034151	-	Zn(2)-C6 fungal-type DNA-binding domain
AFLA_028860	190.6232588	52.86181167	1.8504	0.0016887	0.013431	-	Amidohydrolase-related||Metal-dependent hydrolase||Metal-dependent hydrolase, composite domain
AFLA_028990	561.3749526	5621.129142	-3.3238	0.00037568	0.0040876	-//-
AFLA_029000	245.3545044	2558.611138	-3.3824	0.00012051	0.0016111	-//-
AFLA_029040	639.4074398	1517.462223	-1.2469	0.0038358	0.025132	-	Dedicator of cytokinesis, C-terminal||SH3 domain||DHR-1 domain||DOCK1 homologue||DHR-2 domain||Dedicator of cytokinesis, N-terminal domain||Dedicator of cytokinesis
AFLA_029140	1741.726674	441.9512361	1.9786	7.42E-06	0.00015499	-	GNAT domain||Siderophore biosynthesis protein, conserved domain||Acyl-CoA N-acyltransferase
AFLA_029230	78.45213097	17.91540504	2.1306	0.00066626	0.0065159	-	Zn(2)-C6 fungal-type DNA-binding domain
AFLA_029250	1338.880581	3793.994267	-1.5027	0.00079754	0.0075358	-	PSP1, C-terminal
AFLA_029290	24.91130104	3.014743372	3.0467	0.0025743	0.018853	-//-
AFLA_029330	67.29962981	176.9149046	-1.3944	0.0048317	0.030089	-	Zinc finger, RING/FYVE/PHD-type||Zinc finger, RING-type
AFLA_029350	262.7824137	63.82749503	2.0416	5.27E-05	0.00081202	-	Nitrogen permease regulator 2
AFLA_029380	280.033014	49.87036116	2.4893	7.35E-07	2.15E-05	-	Urease, gamma/gamma-beta subunit||Urease, alpha subunit||Metal-dependent hydrolase||Metal-dependent hydrolase, composite domain||Urease active site||Urease||Urease alpha-subunit, N-terminal domain||Urease nickel binding site||Urease, beta subunit||Urease, alpha subunit, C-terminal||Amidohydrolase-related
AFLA_029390	3886.409052	1674.525047	1.2147	0.0038804	0.025319	-	High mobility group box domain
AFLA_029430	54.35323416	8.542963319	2.6696	0.00020863	0.0025284	-//-
AFLA_029540	524.2791704	1367.908987	-1.3836	0.0013771	0.011549	-	P-loop containing nucleoside triphosphate hydrolase||ABC transporter-like||ABC transporter, conserved site||AAA+ ATPase domain||ABC transporter type 1, transmembrane domain
AFLA_029550	76.81386178	16.11545845	2.2529	0.00055832	0.0056859	-	Calcineurin-like phosphoesterase domain, apaH type||Metallo-dependent phosphatase-like
AFLA_029580	806.6464502	339.2207069	1.2497	0.004677	0.029274	-	Leucine-rich repeat||Leucine-rich repeat, typical subtype||Leucine-rich repeat domain, L domain-like||Leucine rich repeat 4
AFLA_029650	297.9014011	732.7864561	-1.2986	0.0035061	0.023575	-//-
AFLA_029720	712.5581773	264.9400643	1.4273	0.0016208	0.013017	-	Cytochrome P450, conserved site||Cytochrome P450, E-class, group I||Cytochrome P450
AFLA_029750	1464.582531	5667.484327	-1.9522	0.0011896	0.010296	-	Protein of unknown function DUF2457
AFLA_029800	373.6236782	1409.611507	-1.9156	0.0050663	0.03126	-	Sphingomyelinase D/Phospholipase D||PLC-like phosphodiesterase, TIM beta/alpha-barrel domain
AFLA_029850	605.4145263	6596.983808	-3.4458	0.0083632	0.045596	-//-
AFLA_030000	792.6063896	2624.621677	-1.7274	8.52E-05	0.0012207	-	3'5'-cyclic nucleotide phosphodiesterase||3'5'-cyclic nucleotide phosphodiesterase, conserved site||3'5'-cyclic nucleotide phosphodiesterase, catalytic domain||HD/PDEase domain
AFLA_030050	431.3400112	175.0787526	1.3008	0.0039568	0.025737	-	GNAT domain||Acyl-CoA N-acyltransferase
AFLA_030100	1943.344926	7442.170652	-1.9372	1.00E-05	0.00020039	-	Pleckstrin homology domain||PH domain-like
AFLA_030120	1200.756904	2798.596471	-1.2208	0.0047147	0.029463	-	UBA-like||NTF2-like domain||Nuclear transport factor 2||Leucine-rich repeat domain, L domain-like||TAP C-terminal (TAP-C) domain||Nuclear RNA export factor||Nuclear transport factor 2, eukaryote||Leucine-rich repeat
AFLA_030140	11498.22826	4483.369725	1.3588	0.0010965	0.0097244	-	Ribosomal protein L10P||60S acidic ribosomal protein P0
AFLA_030160	1147.568707	435.8444709	1.3967	0.0014442	0.011964	-	Uroporphyrinogen decarboxylase (URO-D)||Uroporphyrinogen decarboxylase HemE
AFLA_030180	4804.380666	10761.00195	-1.1634	0.0066826	0.038629	-	HSP40/DnaJ peptide-binding||Heat shock protein DnaJ, cysteine-rich domain||Chaperone DnaJ, C-terminal||Chaperone DnaJ||DnaJ domain, conserved site||DnaJ domain
AFLA_030190	3040.046315	114.1008499	4.7357	0.00080831	0.0076147	-	STAS domain||SLC26A/SulP transporter||SLC26A/SulP transporter domain
AFLA_030250	57.7454498	14.00481144	2.0438	0.0016703	0.013319	-	Ergosterol biosynthesis ERG4/ERG24||Sterol reductase, conserved site
AFLA_030260	347.890234	147.2895205	1.24	0.0083023	0.04542	-	CTAG/Pcc1 family
AFLA_030280	1390.253827	608.3649397	1.1923	0.0069869	0.040039	-	Protein-tyrosine phosphatase, active site||Dual specificity/tyrosine protein phosphatase, N-terminal||Protein-tyrosine phosphatase, catalytic||Dual specificity phosphatase, catalytic domain||Protein-tyrosine phosphatase-like||Tyrosine-protein phosphatase CDC14||Dual specificity protein phosphatase domain||Tyrosine specific protein phosphatases domain
AFLA_030290	19.95514651	0	Inf	5.24E-05	0.00080795	-//-
AFLA_030300	108.1190352	9.918488417	3.4464	5.08E-08	1.99E-06	-	Phytanoyl-CoA dioxygenase
AFLA_030310	85.25993023	5.175190412	4.0422	1.58E-08	7.23E-07	-	Major facilitator superfamily||Major facilitator, sugar transporter-like||Major facilitator superfamily domain||Sugar transporter, conserved site
AFLA_030350	95.4081502	248.7153192	-1.3823	0.0036974	0.024437	-	Major facilitator superfamily domain||Sugar transporter, conserved site||Sugar/inositol transporter||Major facilitator, sugar transporter-like
AFLA_030370	320.7882389	15.43388898	4.3774	0.0011173	0.0098464	-	NAD-dependent epimerase/dehydratase, N-terminal domain||NAD(P)-binding domain
AFLA_030380	39.97776517	10.50576067	1.928	0.0091664	0.048775	-	Cation efflux protein transmembrane domain||Cation efflux protein, cytoplasmic domain||Cation efflux protein
AFLA_030390	719.7033055	169.9348661	2.0824	3.91E-06	9.14E-05	-	Homeodomain-like||Homeobox domain||Homeobox, conserved site
AFLA_030410	279.5293903	641.4393902	-1.1983	0.0066901	0.038654	-//-
AFLA_030420	418.9438643	99.79781739	2.0697	1.08E-05	0.00021237	-	Domain of unknown function DUF2235
AFLA_030520	207.7725667	1778.401171	-3.0975	0.00020332	0.0024807	-	Major facilitator superfamily domain||Sugar transporter, conserved site||Sugar/inositol transporter||Major facilitator, sugar transporter-like
AFLA_030530	802.8580567	3256.023301	-2.0199	0.004672	0.029269	-	Zn(2)-C6 fungal-type DNA-binding domain||Transcription factor domain, fungi
AFLA_030550	92.17915258	0	Inf	2.03E-08	8.78E-07	-//-
AFLA_030570	5.261588056	114.5057902	-4.4438	0.0015762	0.012779	-	P-loop containing nucleoside triphosphate hydrolase||Small GTPase superfamily||Small GTPase superfamily, Ras type||Small GTP-binding protein domain
AFLA_030580	3501.901508	29852.62734	-3.0916	5.38E-08	2.10E-06	-	Zinc finger, C2H2-like||Zinc finger C2H2-type/integrase DNA-binding domain||Zinc finger, C2H2
AFLA_030610	443.8654365	157.3674103	1.496	0.0015396	0.012572	-	Haem oxygenase-like, multi-helical||Thiaminase-2/PQQC
AFLA_030890	7044.530528	2338.267369	1.5911	0.00018052	0.0022483	-	NAD(P)-binding domain||Alanine dehydrogenase/pyridine nucleotide transhydrogenase, NAD(H)-binding domain||Alanine dehydrogenase/pyridine nucleotide transhydrogenase, N-terminal||Saccharopine dehydrogenase [NAD(+), L-lysine-forming]
AFLA_030970	1597.997607	468.6100353	1.7698	5.15E-05	0.00079596	-	Homoserine dehydrogenase, conserved site||Homoserine dehydrogenase lacking ACT domain||NAD(P)-binding domain||Homoserine dehydrogenase, catalytic||Aspartate/homoserine dehydrogenase, NAD-binding
AFLA_031000	4486.685013	1735.700765	1.3701	0.0012182	0.0105	-	High mobility group box domain
AFLA_031090	479.5819707	3097.704172	-2.6914	2.21E-09	1.26E-07	-//-
AFLA_031100	86.25989128	1002.049846	-3.5381	4.03E-06	9.40E-05	-//-
AFLA_031110	14.52193014	119.313935	-3.0385	3.71E-07	1.21E-05	-//-
AFLA_031130	621.068881	236.6122225	1.3922	0.002356	0.017509	-	Nucleotide-diphospho-sugar transferases||Alpha-mannosyltransferase
AFLA_031240	23.65639402	2.965330951	2.996	0.0038055	0.02496	-	O-methyltransferase COMT-type||O-methyltransferase, family 2||S-adenosyl-L-methionine-dependent methyltransferase
AFLA_031330	728.4817803	276.6854311	1.3966	0.0012906	0.010996	-	Macro-like domain
AFLA_031340	730.5540332	4154.80611	-2.5077	1.92E-08	8.48E-07	-	Transcription factor Aft1, HRA domain||Basic-leucine zipper domain||Transcription factor Aft1, HRR domain||Transcription factor Aft1, osmotic stress domain
AFLA_031390	10653.26138	4430.713018	1.2657	0.0026744	0.019382	-	Ubiquitin domain||Ubiquitin||Ubiquitin conserved site||Ubiquitin-related domain||Ribosomal protein S27a||Zinc-binding ribosomal protein
AFLA_031450	205.5224446	743.9179947	-1.8558	4.60E-05	0.00072453	-	CP2 transcription factor
AFLA_031510	400.9403858	123.4486379	1.6995	0.0002749	0.0032047	-	Pyridoxal phosphate-dependent decarboxylase||Pyridoxal phosphate-dependent transferase||Pyridoxal phosphate-dependent transferase, major region, subdomain 1||Pyridoxal phosphate-dependent transferase, major region, subdomain 2
AFLA_031570	22404.50027	5522.667555	2.0204	0.0006762	0.0065977	-	Thiamine pyrophosphate enzyme, N-terminal TPP-binding domain||Thiamine pyrophosphate enzyme, central domain||Thiamin diphosphate-binding fold||Thiamine pyrophosphate enzyme, C-terminal TPP-binding||Thiamine pyrophosphate (TPP)-dependent enzyme||DHS-like NAD/FAD-binding domain
AFLA_031580	668.7586819	180.680487	1.888	2.80E-05	0.0004781	-	THUMP domain
AFLA_031620	1561.712907	641.3456057	1.284	0.0035358	0.023711	-	Histone chaperone ASF1-like||Histone deposition protein Asf1
AFLA_031680	829.5935401	328.3520543	1.3372	0.0022539	0.016923	-	PTP type protein phosphatase||Protein-tyrosine phosphatase-like||Protein-tyrosine phosphatase, active site||Tyrosine specific protein phosphatases domain||Protein-tyrosine phosphatase, catalytic
AFLA_031730	168.6214181	45.44033292	1.8917	0.0060763	0.035817	-	Alcohol dehydrogenase, C-terminal||Alcohol dehydrogenase superfamily, zinc-type||NAD(P)-binding domain||Polyketide synthase, enoylreductase domain||GroES-like||Alcohol dehydrogenase, N-terminal
AFLA_031740	371.7337931	129.8569454	1.5173	0.0012195	0.010502	-//-
AFLA_031760	835.0633956	2079.381723	-1.3162	0.0021759	0.016522	-	Domain of unknown function DUF1793||Domain of unknown function DUF4965||Domain of unknown function DUF5127
AFLA_031790	331.805406	2028.125377	-2.6117	5.89E-07	1.80E-05	-	Basic-leucine zipper domain
AFLA_031800	159.8914764	514.7637438	-1.6868	0.00075269	0.0071877	-	P-loop containing nucleoside triphosphate hydrolase||RNA helicase, DEAD-box type, Q motif||ATP-dependent RNA helicase DEAD-box, conserved site||Helicase superfamily 1/2, ATP-binding domain||DEAD/DEAH box helicase domain
AFLA_031880	433.4365329	40.82574344	3.4083	5.96E-07	1.81E-05	-	RTA-like protein
AFLA_031900	470.8489843	1294.104852	-1.4586	0.00091997	0.0084451	-	Xylulose 5-phosphate/Fructose 6-phosphate phosphoketolase, conserved site||Xylulose 5-phosphate/Fructose 6-phosphate phosphoketolase||Xylulose 5-phosphate/Fructose 6-phosphate phosphoketolase, thiamine diphosphate binding site||Thiamin diphosphate-binding fold||Transketolase C-terminal/Pyruvate-ferredoxin oxidoreductase domain II||Xylulose 5-phosphate/Fructose 6-phosphate phosphoketolase, N-termi…
AFLA_032000	235.1666366	1075.296611	-2.193	1.01E-06	2.82E-05	-	P-type ATPase, subfamily IIB||Cation-transporting P-type ATPase, C-terminal||P-type ATPase, transmembrane domain||HAD-like domain||P-type ATPase, cytoplasmic domain N||P-type ATPase, A domain||Cation-transporting P-type ATPase, N-terminal||P-type ATPase
AFLA_032040	109.0706996	12.57485379	3.1167	0.0018532	0.014529	-	GNAT domain||Acyl-CoA N-acyltransferase
AFLA_032060	90.34703045	219.4231805	-1.2802	0.0085649	0.046389	-//-
AFLA_032130	488.2752945	93.82117886	2.3797	5.34E-07	1.67E-05	-	AdipoR/Haemolysin-III-related
AFLA_032140	318.5918535	46.02995108	2.7911	2.94E-08	1.22E-06	-//-
AFLA_032230	538.4812416	4110.397125	-2.9323	4.71E-05	0.00073877	-	Putative stress-responsive protein
AFLA_032250	2798.741702	1177.258895	1.2493	0.0036291	0.024156	-	NTF2-like domain||Nuclear transport factor 2, eukaryote||Nuclear transport factor 2
AFLA_032290	156.4116633	798.4887496	-2.3519	2.79E-07	9.38E-06	-//-
AFLA_032330	691.056494	265.6739575	1.3791	0.0018415	0.014473	-//-
AFLA_032440	6.282453574	1478.827047	-7.8789	3.20E-24	1.75E-21	-//-
AFLA_032460	326.9816366	1601.971452	-2.2926	2.04E-07	7.09E-06	-	Transcriptional coactivator/pterin dehydratase||Phosphoribosyltransferase-like
AFLA_032470	2026.730117	5274.186119	-1.3798	0.0011861	0.010273	-	HAD-like domain
AFLA_032510	1590.729268	358.4810101	2.1497	1.87E-06	4.83E-05	-	Mevalonate/galactokinase||GHMP kinase, C-terminal domain||Galactokinase||Ribosomal protein S5 domain 2-type fold, subgroup||Galactokinase, conserved site||Ribosomal protein S5 domain 2-type fold||Galactokinase galactose-binding domain||GHMP kinase N-terminal domain
AFLA_032690	299.3605195	806.465342	-1.4297	0.0013776	0.011549	-	Transcription factor domain, fungi
AFLA_032700	70.79901437	193.7097052	-1.4521	0.0038763	0.025306	-	Zn(2)-C6 fungal-type DNA-binding domain
AFLA_032740	5893.391971	17095.17786	-1.5364	0.00053619	0.0055006	-	Beta2-adaptin/TBP, C-terminal domain||TATA-box binding protein||TATA-box binding protein, conserved site
AFLA_032780	520.472666	1904.170837	-1.8713	2.02E-05	0.00036342	-	Protein kinase-like domain||Protein kinase domain||AGC-kinase, C-terminal||Serine/threonine-protein kinase, active site
AFLA_032840	513.8154203	1294.956321	-1.3336	0.002104	0.016083	-	Fork head domain||SMAD/FHA domain||Winged helix-turn-helix DNA-binding domain||Forkhead-associated (FHA) domain
AFLA_032920	1316.54587	4940.191595	-1.9078	6.66E-06	0.0001411	-//-
AFLA_033080	1140.039704	2755.869968	-1.2734	0.0035265	0.023674	-	Peroxin/Ferlin domain
AFLA_033160	1466.559015	5223.565479	-1.8326	4.32E-05	0.00068746	-	Zinc finger, C2H2-like||Zinc finger C2H2-type/integrase DNA-binding domain||Zinc finger, C2H2
AFLA_033180	1517.46427	539.5968592	1.4917	0.00085099	0.0079513	-	WD40 repeat, conserved site||WD40 repeat||The WD repeat Cdc20/Fizzy family||Anaphase-promoting complex subunit 4, WD40 domain||WD40-repeat-containing domain||WD40/YVTN repeat-like-containing domain
AFLA_033390	1374.918132	582.4484499	1.2391	0.0036276	0.024156	-	Phosphoribosyl-ATP pyrophosphohydrolase-like||Histidinol dehydrogenase, conserved site||Phosphoribosyl-ATP pyrophosphohydrolase||Aldehyde/histidinol dehydrogenase||Phosphoribosyl-AMP cyclohydrolase domain||Histidinol dehydrogenase||Histidine biosynthesis trifunctional-protein
AFLA_033430	2195.965272	6960.22815	-1.6643	0.00094117	0.0085957	-	Short-chain dehydrogenase/reductase SDR||Short-chain dehydrogenase/reductase, conserved site||NAD(P)-binding domain
AFLA_033440	211.6444481	779.8996877	-1.8816	8.60E-05	0.0012311	-	Amidase||Amidase signature domain
AFLA_033450	31.93842688	126.6370814	-1.9873	0.00028872	0.0033257	-	Rieske [2Fe-2S] iron-sulphur domain||FAD/NAD(P)-binding domain||FAD dependent oxidoreductase
AFLA_033540	172.3724888	465.9212286	-1.4346	0.0018454	0.014485	-	Bul1, C-terminal||Arrestin-like, N-terminal
AFLA_033570	807.602126	1882.515401	-1.2209	0.0055871	0.033724	-	U3 small nucleolar RNA-associated protein 10||Armadillo-type fold||BP28, C-terminal domain||Armadillo-like helical
AFLA_033690	6066.564879	2381.229087	1.3492	0.001225	0.010528	-	Ribosomal protein L31e||Ribosomal protein L31e domain
AFLA_033750	367.326844	2784.699177	-2.9224	1.17E-10	8.94E-09	-	Concentrative nucleoside transporter||Concentrative nucleoside transporter N-terminal domain||Concentrative nucleoside transporter C-terminal domain
AFLA_033870	7.16485944	38.57918604	-2.4288	0.0022815	0.017107	-	Helicase superfamily 1/2, ATP-binding domain||DEAD/DEAH box helicase domain||Winged helix-turn-helix DNA-binding domain||Sec63 domain||Helicase, C-terminal||P-loop containing nucleoside triphosphate hydrolase
AFLA_033880	783.1594191	3219.472521	-2.0394	3.46E-06	8.27E-05	-	Nucleotide-sugar transporter
AFLA_033920	856.178585	2592.139679	-1.5982	0.0060577	0.035741	-	WD40 repeat, conserved site||WD40 repeat||G-protein beta WD-40 repeat||WD40-repeat-containing domain||F-box domain||WD40/YVTN repeat-like-containing domain
AFLA_033940	343.6343345	143.8221019	1.2566	0.0077443	0.043197	-	Longin-like domain||AP complex, mu/sigma subunit||Adaptor protein complex, sigma subunit||AP-3 complex subunit sigma
AFLA_033950	1528.962936	91.29074288	4.0659	1.09E-06	2.99E-05	-	FMN-binding split barrel||UbiD-like decarboxylase/ferulic acid decarboxylase 1||UbiD decarboxylyase family
AFLA_033960	186.0722311	5.83183706	4.9958	0.0010231	0.0091968	-	Flavoprotein||Flavin prenyltransferase UbiX/Pad1
AFLA_034030	1998.062513	11513.0086	-2.5266	1.54E-08	7.13E-07	-	Glycosyl transferase, family 20||Alpha,alpha-trehalose-phosphate synthase
AFLA_034050	10054.23916	23389.34366	-1.218	0.0032897	0.022508	-	Aconitase/3-isopropylmalate dehydratase large subunit, alpha/beta/alpha, subdomain 2||Aconitase/3-isopropylmalate dehydratase, swivel||Aconitase/3-isopropylmalate dehydratase large subunit, alpha/beta/alpha domain||Aconitase A/isopropylmalate dehydratase small subunit, swivel domain||Aconitase/3-isopropylmalate dehydratase large subunit, alpha/beta/alpha, subdomain 1/3||Aconitase/isopropylmalate …
AFLA_034150	748.8756928	296.0294278	1.339	0.0033172	0.022607	-	P-loop containing nucleoside triphosphate hydrolase||Kinesin motor domain||Kinesin-like protein
AFLA_034190	3822.25435	1788.718624	1.0955	0.0076925	0.042957	-	NAD-dependent epimerase/dehydratase, N-terminal domain||NAD(P)-binding domain
AFLA_034200	468.4938842	1280.764909	-1.4509	0.00084324	0.0078964	-	S-adenosyl-L-methionine-dependent methyltransferase
AFLA_034250	217.164259	1180.107791	-2.4421	0.0084908	0.046073	-	Domain of unknown function DUF2427||Uncharacterised domain YCR061W, C-terminal
AFLA_034280	8422.506079	3486.804161	1.2723	0.0023078	0.017253	-	Ribosomal protein S14, conserved site||Ribosomal protein S14||Ribosomal protein S14, type Z, archaeal
AFLA_034340	10118.83164	3883.889962	1.3815	0.00091236	0.0083984	-	Winged helix-turn-helix DNA-binding domain||Plectin/S10, N-terminal
AFLA_034390	5.560893746	49.03755186	-3.1405	0.004299	0.027494	-//-
AFLA_034410	1603.655882	588.9643053	1.4451	0.00091355	0.0083984	-	Pyridoxal phosphate-dependent transferase, major region, subdomain 2||Pyridoxal phosphate-dependent transferase||Pyridoxal phosphate-dependent transferase, major region, subdomain 1||Aminotransferase, class I/classII
AFLA_034470	1653.42239	758.791002	1.1237	0.0074998	0.042301	-	ADC synthase||Anthranilate synthase component I-like||Anthranilate synthase component I, PabB-like||Chorismate-utilising enzyme, C-terminal||Anthranilate synthase component I, N-terminal
AFLA_034480	196.9620807	612.0891074	-1.6358	0.0078484	0.043621	-//-
AFLA_034490	1279.670258	3448.21234	-1.4301	0.00099457	0.0090048	-	ENTH/VHS||ENTH domain
AFLA_034560	95.73409218	452.0481856	-2.2394	0.0032284	0.022231	-	Transcription factor domain, fungi
AFLA_034580	8.427689207	53.28269053	-2.6605	0.00084268	0.0078964	-	Tricarboxylate/iron carrier
AFLA_034670	1354.774299	604.3658291	1.1646	0.0061809	0.036348	-	WGR domain||BRCT domain||Poly(ADP-ribose) polymerase, regulatory domain||Poly(ADP-ribose) polymerase, catalytic domain
AFLA_034700	833.9027291	235.0236251	1.8271	5.16E-05	0.00079596	-//-
AFLA_034830	117.9810378	4.320894081	4.7711	0.00030792	0.0034862	-	Class I glutamine amidotransferase-like
AFLA_034850	9.404933831	0	Inf	0.0084895	0.046073	-	Transferase||Chloramphenicol acetyltransferase-like domain
AFLA_034890	3.095439434	189.626134	-5.9369	0.0091378	0.048683	-	Sugar/inositol transporter||Major facilitator, sugar transporter-like||Major facilitator superfamily domain||Sugar transporter, conserved site
AFLA_035070	466.6279951	148.8892025	1.648	0.0003039	0.0034562	-	Alternative oxidase
AFLA_035170	516.3344196	162.7106358	1.666	0.00036191	0.0039618	-	Domain of unknown function DUF4110||Kelch-type beta propeller
AFLA_035210	690.5723098	1605.089064	-1.2168	0.0053508	0.032621	-	K Homology domain||K Homology domain, type 1
AFLA_035280	18.99015755	0.804883911	4.5603	0.0010644	0.0095073	-	MTH1187/YkoF-like||Thiamine-binding protein
AFLA_035290	188.1770013	759.6164284	-2.0132	6.26E-05	0.00094143	-	Thiamin diphosphate-binding fold||Dehydrogenase, E1 component||Pyruvate dehydrogenase (acetyl-transferring) E1 component, alpha subunit, subgroup y
AFLA_035320	305.7243554	133.7894846	1.1923	0.0087401	0.047011	-	GTP-binding nuclear protein Ran-related
AFLA_035340	365.9515925	122.7083909	1.5764	0.00061302	0.0060852	-	Pre-rRNA-processing protein TSR2
AFLA_035390	846.3882748	372.8243105	1.1828	0.0079381	0.044004	-	Autophagy-related protein 13
AFLA_035430	21.26666466	152.3927672	-2.8411	4.10E-05	0.00065619	-	Short-chain dehydrogenase/reductase SDR||NAD(P)-binding domain||Short-chain dehydrogenase/reductase, conserved site
AFLA_035490	414.0673801	961.7586187	-1.2158	0.0059082	0.035023	-	Rhodanese-like domain||Ubiquitin specific protease domain||Peptidase C19, ubiquitin carboxyl-terminal hydrolase
AFLA_035520	246.5971345	30.73011908	3.0044	1.95E-08	8.53E-07	-	Purine-cytosine permease||Purine-cytosine permease Fcy2/21/22
AFLA_035630	47.35101993	249.5957605	-2.3981	2.54E-06	6.36E-05	-//-
AFLA_035680	22085.70984	7413.895864	1.5748	0.00018399	0.0022848	-	Alpha/beta hydrolase fold-1||Epoxide hydrolase-like||Alpha/Beta hydrolase fold
AFLA_035750	278.4215258	78.54289317	1.8257	0.00017127	0.0021567	-	Protein kinase-like domain||Protein kinase domain||Serine/threonine-protein kinase, active site||Protein kinase, ATP binding site
AFLA_035780	1617.598734	619.5831456	1.3845	0.0021759	0.016522	-	Histidine phosphatase superfamily, clade-1||Histidine phosphatase superfamily
AFLA_035840	770.479482	1891.294674	-1.2955	0.003025	0.021143	-	HECT domain
AFLA_035950	138.7200593	1133.711244	-3.0308	1.19E-10	9.09E-09	-	S-adenosyl-L-methionine-dependent methyltransferase
AFLA_036000	225.6141856	58.64789554	1.9437	9.80E-05	0.00137	-	FAD-binding domain||FAD/NAD(P)-binding domain
AFLA_036050	51.0886959	593.2022051	-3.5374	2.82E-06	6.93E-05	-//-
AFLA_036060	30.34238819	257.9274678	-3.0876	6.27E-05	0.00094143	-	Zn(2)-C6 fungal-type DNA-binding domain
AFLA_036070	43.52322988	1053.526607	-4.5973	7.84E-05	0.0011381	-	Maleylacetoacetate isomerase||Thioredoxin-like fold||Glutathione S-transferase, C-terminal||Glutathione S-transferase, N-terminal||Glutathione S-transferase, C-terminal-like
AFLA_036100	12.20899033	1689.397199	-7.1124	0.00013604	0.0017661	-//-
AFLA_036110	13.88181856	10780.49975	-9.601	0.0011097	0.0097999	-	Glyoxalase/Bleomycin resistance protein/Dihydroxybiphenyl dioxygenase||4-hydroxyphenylpyruvate dioxygenase||Glyoxalase/fosfomycin resistance/dioxygenase domain
AFLA_036140	1044.574144	2897.511364	-1.4719	0.004863	0.030239	-	Protein of unknown function DUF3295||Protein of unknown function DUF1752, fungi
AFLA_036150	3.423585123	50.44061474	-3.881	0.00097944	0.0088935	-//-
AFLA_036170	2871.813571	1267.29255	1.1802	0.0056364	0.033907	-	GroEL-like equatorial domain||Chaperonin Cpn60/TCP-1 family||TCP-1-like chaperonin intermediate domain||GroEL-like apical domain||T-complex protein 1, epsilon subunit||Chaperonin TCP-1, conserved site||Chaperone tailless complex polypeptide 1 (TCP-1)
AFLA_036220	706.5461448	263.9167732	1.4207	0.0013026	0.01107	-	Zinc finger, RING-type||Zinc finger, RING/FYVE/PHD-type
AFLA_036230	85.97503219	567.7287203	-2.7232	6.70E-09	3.42E-07	-	Pyridoxamine 5'-phosphate oxidase-like, FMN-binding domain||FMN-binding split barrel
AFLA_036240	425.5641408	964.7453318	-1.1808	0.0076406	0.042732	-//-
AFLA_036260	16.70899175	0.903708753	4.2086	0.0024141	0.017851	-	Dynamin central domain||Dynamin superfamily||Dynamin, GTPase domain||Dynamin-type guanine nucleotide-binding (G) domain||GTPase effector domain||P-loop containing nucleoside triphosphate hydrolase
AFLA_036290	955.1101115	382.8691752	1.3188	0.0024741	0.018196	-	Hexapeptide repeat||Nucleotide-diphospho-sugar transferases
AFLA_036350	318.6947513	98.09304813	1.7	0.00029684	0.003382	-	E3 SUMO-protein ligase Nse2 (Mms21)||Zinc finger, RING/FYVE/PHD-type||Zinc finger, MIZ-type
AFLA_036440	1102.927921	10730.66119	-3.2823	7.30E-06	0.00015262	-	Pyridoxal phosphate-dependent transferase, major region, subdomain 1||Pyridoxal phosphate-dependent transferase||Pyridoxal phosphate-dependent transferase, major region, subdomain 2||Aminotransferase, class I/classII
AFLA_036560	56.08167915	4.426861509	3.6632	4.50E-06	0.00010237	-	Kre9/Knh1 family
AFLA_036630	8881.717967	462.7086511	4.2627	1.21E-19	3.31E-17	-	Immunoglobulin E-set||Arrestin-like, N-terminal||Arrestin C-terminal-like domain
AFLA_036720	38.74483575	7.765183963	2.3189	0.003642	0.024206	-//-
AFLA_036730	422.8381364	176.6926605	1.2589	0.0053857	0.03276	-	Serine/threonine-protein kinase, active site||Protein kinase, ATP binding site||Protein kinase domain||Protein kinase-like domain
AFLA_036840	14643.07511	4295.814253	1.7692	4.18E-05	0.00066672	-	6-phosphogluconate dehydrogenase, decarboxylating||NAD(P)-binding domain||6-phosphogluconate dehydrogenase, NADP-binding||6-phosphogluconate dehydrogenase, domain 2||6-phosphogluconate dehydrogenase, domain 3||6-phosphogluconate dehydrogenase||6-phosphogluconate dehydrogenase C-terminal domain-like||6-phosphogluconate dehydrogenase, C-terminal||6-phosphogluconate-binding site
AFLA_036860	1147.327569	2492.118255	-1.1191	0.0090796	0.0485	-	Sugar phosphate transporter domain
AFLA_036920	39.13498584	4.320894081	3.1791	0.00019283	0.0023781	-	Heterokaryon incompatibility||Ankyrin repeat||Ankyrin repeat-containing domain
AFLA_036940	197.2476914	26.07337831	2.9194	0.0019085	0.014869	-	Cytochrome P450, E-class, group IV||Cytochrome P450, conserved site||Cytochrome P450
AFLA_037080	978.0244268	2566.373577	-1.3918	0.0013632	0.011475	-	Chitin synthesis regulation, Congo red resistance, RCR protein
AFLA_037160	5295.129429	1925.682039	1.4593	0.00077187	0.0073541	-	Thiamine thiazole synthase||FAD/NAD(P)-binding domain||Thiazole biosynthetic enzyme Thi4 family
AFLA_037180	65.76207593	19.18228848	1.7775	0.0053064	0.032451	-	Major facilitator superfamily domain||Major facilitator superfamily
AFLA_037230	1726.16311	780.3716987	1.1453	0.0060681	0.035785	-	Chorismate synthase||Chorismate synthase, conserved site
AFLA_037260	31.71664531	100.0924841	-1.658	0.0040569	0.026239	-	Major facilitator superfamily domain||Sugar transporter, conserved site||Major facilitator, sugar transporter-like||Sugar/inositol transporter
AFLA_037290	136.3707399	415.958107	-1.6089	0.00055087	0.0056272	-//-
AFLA_037400	1406.130173	304.8498704	2.2056	5.61E-07	1.74E-05	-	Ribosomal protein S36, mitochondrial
AFLA_037480	17312.96129	4956.513633	1.8045	2.52E-05	0.0004357	-	Enolase N-terminal domain-like||Enolase, N-terminal||Enolase, conserved site||Enolase, C-terminal TIM barrel domain||Enolase||Enolase C-terminal domain-like
AFLA_037510	1048.745472	2881.400545	-1.4581	0.00069737	0.0067622	-	P-type ATPase, transmembrane domain||HAD-like domain||P-type ATPase, cytoplasmic domain N||P-type ATPase, subfamily IIA, SERCA-type||P-type ATPase, A domain||P-type ATPase, phosphorylation site||Cation-transporting P-type ATPase, N-terminal||P-type ATPase||Cation-transporting P-type ATPase, C-terminal
AFLA_037590	349.4813669	2960.564217	-3.0826	1.03E-07	3.78E-06	-	Eisosome protein 1
AFLA_037620	116.2243808	833.4959409	-2.8423	0.00012537	0.0016619	-	Frag1/DRAM/Sfk1
AFLA_037760	1010.978432	13013.507	-3.6862	9.17E-11	7.15E-09	-//-
AFLA_037820	7.804566488	7025.885412	-9.8141	8.25E-07	2.38E-05	-	Small heat shock protein HSP20||HSP20-like chaperone||Alpha crystallin/Hsp20 domain
AFLA_037900	445.4778658	192.0263637	1.214	0.0071531	0.040768	-	S-adenosyl-L-methionine-dependent methyltransferase||Uncharacterised protein family, methyltransferase, Williams-Beuren syndrome||Methyltransferase type 11
AFLA_038240	42.15829442	2415.033572	-5.8401	0.0022852	0.017114	-	Major facilitator superfamily||Major facilitator superfamily domain
AFLA_038260	20.24685948	89.02924365	-2.1366	0.0024247	0.017903	-//-
AFLA_038290	134.3054174	508.5103626	-1.9208	0.0029641	0.02081	-	Fungal STAND N-terminal Goodbye domain||P-loop containing nucleoside triphosphate hydrolase||Tetratricopeptide-like helical domain||Tetratricopeptide repeat-containing domain||Tetratricopeptide repeat
AFLA_038340	500.6990165	57.26685781	3.1282	0.00022789	0.0027354	-	Dimeric alpha-beta barrel||Dyp-type peroxidase
AFLA_038350	747.8956417	36.70708594	4.3487	2.37E-11	2.05E-09	-	Immunoglobulin E-set||Galactose-binding domain-like||Kelch repeat type 1||Galactose oxidase/kelch, beta-propeller||Coagulation factor 5/8 C-terminal domain||Immunoglobulin-like fold||Galactose oxidase, beta-propeller||Domain of unknown function DUF1929
AFLA_038420	0	44.69533492	#NAME?	2.72E-08	1.14E-06	-	Fungal chitosanase
AFLA_038540	120.7413904	0.903708753	7.0618	0.0035896	0.024004	-	ABC transporter-like||P-loop containing nucleoside triphosphate hydrolase||ABC transporter, conserved site||AAA+ ATPase domain
AFLA_038550	219.4466067	2.209859461	6.6338	0.0054073	0.032875	-	ABC transporter type 1, transmembrane domain||ABC transporter-like||P-loop containing nucleoside triphosphate hydrolase
AFLA_038560	100.9171896	1.659180243	5.9266	0.0056488	0.033937	-	HotDog domain
AFLA_038580	3577.420557	474.0839868	2.9157	0.00075411	0.0071958	-	RTA-like protein
AFLA_038590	195.2104638	2.209859461	6.4649	0.0013681	0.011496	-	Ankyrin repeat-containing domain||Ankyrin repeat
AFLA_038600	398.3528924	112.9439098	1.8184	0.0046127	0.028996	-	Amino acid adenylation domain||AMP-dependent synthetase/ligase||AMP-binding, conserved site||Phosphopantetheine binding ACP domain||Condensation domain||Polyketide synthase, phosphopantetheine-binding domain
AFLA_038610	329.565466	110.5914898	1.5753	0.00099388	0.0090048	-	Ankyrin repeat-containing domain||Ankyrin repeat
AFLA_038630	737.1885953	5.320753445	7.1143	0.0037803	0.024834	-	Cytochrome P450||Cytochrome P450, conserved site||Cytochrome P450, E-class, group I
AFLA_038640	848.7489923	19.00678249	5.4808	0.0076389	0.042732	-	Acyl transferase/acyl hydrolase/lysophospholipase||Thiolase-like||NAD(P)-binding domain||Beta-ketoacyl synthase, N-terminal||Beta-ketoacyl synthase, C-terminal||Acyl transferase domain
AFLA_038650	95.82386345	30.74479186	1.64	0.0046878	0.029324	-	Aspartic peptidase A1 family||Peptidase family A1 domain||Aspartic peptidase, active site||Aspartic peptidase domain
AFLA_038700	42.69989439	296.1416394	-2.794	0.00043166	0.0045777	-	Peptidase M28
AFLA_038710	268.9493007	11.35291442	4.5662	0.00053109	0.0054572	-//-
AFLA_038720	130.5177244	24.04851332	2.4402	0.0037053	0.024443	-	Polyprenyl synthetase, conserved site||Isoprenoid synthase domain||Polyprenyl synthetase
AFLA_038730	42.40532189	0	Inf	5.92E-09	3.03E-07	-	Glycoside hydrolase family 26||Glycoside hydrolase superfamily||Glycosyl hydrolase family 26 domain||Glycoside hydrolase, catalytic domain
AFLA_038780	300.3863419	10952.77845	-5.1883	2.36E-21	7.80E-19	-	Amino acid transporter, transmembrane domain
AFLA_038890	31.66575748	149.2775234	-2.237	3.29E-05	0.00054355	-	Major facilitator superfamily||Major facilitator superfamily domain
AFLA_038990	19.64285058	89.75269535	-2.192	0.0002312	0.0027645	-	FAD/NAD(P)-binding domain||Pyridine nucleotide-disulphide oxidoreductase, class-II
AFLA_039010	33.50914942	2.513476575	3.7368	0.0020566	0.015798	-	Fungal transcription factor||Zn(2)-C6 fungal-type DNA-binding domain
AFLA_039060	1.115708536	14.28595652	-3.6786	0.0078331	0.043576	-	Major facilitator superfamily domain||Proton-dependent oligopeptide transporter family
AFLA_039170	106.8915778	18.56223487	2.5257	2.66E-05	0.00045559	-//-
AFLA_039190	142.3687923	20.40428712	2.8027	6.95E-06	0.0001464	-//-
AFLA_039200	1215.709723	63.35960892	4.2621	0.00060426	0.006022	-	Cytochrome P450, E-class, group I||Cytochrome P450, conserved site||Cytochrome P450
AFLA_039210	759.6445044	24.13937474	4.9759	0.00071363	0.0068933	-	Cytochrome P450||Cytochrome P450, conserved site||Cytochrome P450, E-class, group IV
AFLA_039220	1818.663688	49.47179017	5.2001	0.00063602	0.0062591	-	Cytochrome P450
AFLA_039230	1019.110913	27.69247045	5.2017	0.00055121	0.0056272	-	Short-chain dehydrogenase/reductase SDR||NAD(P)-binding domain
AFLA_039240	110.5644177	1.207325866	6.5169	0.0026456	0.01924	-	Isoprenoid synthase domain
AFLA_039320	13.73796138	67.59274904	-2.2987	0.00037931	0.0041163	-	Major facilitator superfamily domain||Major facilitator superfamily
AFLA_039360	208.3150544	36.49776604	2.5129	1.61E-06	4.22E-05	-	ABC transporter, conserved site||ABC transporter type 1, transmembrane domain||AAA+ ATPase domain||P-loop containing nucleoside triphosphate hydrolase||ABC transporter-like
AFLA_039380	298.348782	11.31811551	4.7203	5.45E-08	2.11E-06	-	Amino acid permease/ SLC12A domain||Amino acid/polyamine transporter I||Amino acid permease, conserved site
AFLA_039410	814.6941011	82137.92767	-6.6556	8.22E-20	2.46E-17	-	Cell wall mannoprotein 1
AFLA_039600	294.6846677	67.25303139	2.1315	1.59E-05	0.00029359	-//-
AFLA_039610	69.9916074	23.00175159	1.6054	0.0088748	0.047581	-	Zn(2)-C6 fungal-type DNA-binding domain||S-adenosyl-L-methionine-dependent methyltransferase||Methyltransferase domain
AFLA_039620	187.5887804	52.67016711	1.8325	0.00030507	0.0034664	-	Major facilitator superfamily domain||Major facilitator superfamily||Tetracycline resistance protein TetA/multidrug resistance protein MdtG
AFLA_039650	601.4589139	181.1727629	1.7311	0.0065873	0.038166	-	Ferredoxin reductase-type FAD-binding domain||Riboflavin synthase-like beta-barrel||NADH:cytochrome b5 reductase (CBR)||Oxidoreductase, FAD-binding domain||Oxidoreductase FAD/NAD(P)-binding||Flavoprotein pyridine nucleotide cytochrome reductase
AFLA_039670	27.3056891	2.16044704	3.6598	0.00047584	0.0049791	-	Major facilitator superfamily||Major facilitator superfamily domain
AFLA_039680	44.50693237	8.528126373	2.3837	0.0024623	0.018138	-	FAD dependent oxidoreductase||FAD/NAD(P)-binding domain
AFLA_039690	48.63262921	0	Inf	6.52E-10	4.31E-08	-	Histidine phosphatase superfamily, clade-1||Histidine phosphatase superfamily
AFLA_039710	474.2105226	74.92364908	2.662	2.25E-08	9.70E-07	-	NAD(P)-binding domain||Alcohol dehydrogenase superfamily, zinc-type||Polyketide synthase, enoylreductase domain||Alcohol dehydrogenase, N-terminal||GroES-like
AFLA_039730	16.65091148	106.5903175	-2.6784	0.0014314	0.011873	-	Alpha/Beta hydrolase fold||Peptidase S33 tripeptidyl aminopeptidase-like, C-terminal
AFLA_039760	44.57033142	10.70341036	2.058	0.0046776	0.029274	-	Ankyrin repeat-containing domain
AFLA_039780	495.2893749	90.3470053	2.4547	2.16E-07	7.43E-06	-	Polyketide synthase, phosphopantetheine-binding domain||Polyketide synthase, ketoreductase domain||Phosphopantetheine binding ACP domain||NAD(P)-binding domain
AFLA_039830	128.9139696	13.1109195	3.2976	1.39E-06	3.71E-05	-//-
AFLA_039870	102.4439291	1310.589467	-3.6773	0.0014369	0.011912	-	Histidine phosphatase superfamily, clade-2||Histidine phosphatase superfamily
AFLA_039940	127.8347555	47.35655625	1.4326	0.0071514	0.040768	-	Zinc finger, MYND-type
AFLA_040040	4.343484047	305.9223184	-6.1382	8.01E-07	2.31E-05	-	Cell wall mannoprotein 1
AFLA_040060	14.20024232	265.0329686	-4.2222	3.95E-14	5.23E-12	-	Tetratricopeptide repeat||Tetratricopeptide-like helical domain||Tetratricopeptide repeat-containing domain
AFLA_040150	1844.398282	5057.920386	-1.4554	0.00074969	0.0071692	-	Amino acid/polyamine transporter I
AFLA_040160	45.98828392	762.6353801	-4.0517	0.0056034	0.03379	-	Molybdenum cofactor sulfurase, C-terminal||Pyruvate kinase-like, insert domain||MOSC, N-terminal beta barrel
AFLA_040170	3.716032668	94.82115677	-4.6734	0.00047916	0.0050096	-//-
AFLA_040230	53.65618567	9.34784723	2.521	0.00040553	0.0043484	-	Low affinity iron permease, Fet4
AFLA_040260	1686.774645	757.3070314	1.1553	0.0064891	0.037684	-	Myc-type, basic helix-loop-helix (bHLH) domain
AFLA_040370	5.199913696	121.2320234	-4.5431	7.20E-07	2.11E-05	-	Copper amine oxidase, N-terminal||Copper amine oxidase, C-terminal||Domain of unknown function DUF1965||Copper amine oxidase||Copper amine oxidase, N2-terminal
AFLA_040440	0.261078063	65.80284271	-7.9775	5.73E-13	6.21E-11	-//-
AFLA_040450	365.4524743	137.3386384	1.4119	0.0024694	0.01818	-	Amino acid/polyamine transporter I||Amino acid permease, conserved site
AFLA_040800	545.3740622	13129.35655	-4.5894	1.84E-05	0.00033483	-//-
AFLA_040840	162.4249756	22.55720397	2.8481	4.77E-07	1.51E-05	-	Protein kinase domain||Protein kinase-like domain
AFLA_041010	1203.175552	3256.403827	-1.4364	0.0010039	0.0090572	-//-
AFLA_041030	595.8057108	239.4794785	1.3149	0.0049176	0.030473	-	Aldo/keto reductase, conserved site||Aldo/keto reductase||NADP-dependent oxidoreductase domain||Aldo/keto reductase/potassium channel subunit beta
AFLA_041040	0	215.0724978	#NAME?	0.0035802	0.023971	-	Major facilitator superfamily||Major facilitator superfamily domain
AFLA_041050	0	85.40873184	#NAME?	2.02E-06	5.16E-05	-	Alpha/Beta hydrolase fold||Putative esterase
AFLA_041160	51.37787939	13.66137528	1.911	0.0081093	0.044717	-	Isopenicillin N synthase-like||Oxoglutarate/iron-dependent dioxygenase
AFLA_041280	326.2310217	7.35292519	5.4714	1.38E-17	2.99E-15	-	FAD/NAD(P)-binding domain||Flavin monooxygenase-like
AFLA_041440	173.695577	3064.297531	-4.1409	7.58E-15	1.12E-12	-	NTF2-like domain
AFLA_041480	6.401803672	244.8794843	-5.2574	0.0011672	0.010158	-	Xaa-Pro dipeptidyl-peptidase-like domain||Alpha/Beta hydrolase fold
AFLA_041500	655.1931366	1835.225254	-1.486	0.00071768	0.0069271	-//-
AFLA_041620	127.3962726	3.869039704	5.0412	0.0011656	0.010151	-	Aquaporin-like||Major intrinsic protein
AFLA_041630	44.21195534	7.83690425	2.4961	0.0008843	0.0082015	-	Ankyrin repeat||Ankyrin repeat-containing domain
AFLA_041660	76.34472269	25.71020362	1.5702	0.0092917	0.049298	-	Flavin monooxygenase-like||FAD/NAD(P)-binding domain
AFLA_041820	116.4086693	12.66620772	3.2001	1.57E-07	5.52E-06	-	Rhamnogalacturonase B, N-terminal||Glycoside hydrolase-type carbohydrate-binding||Rhamnogalacturonan lyase, domain II||Rhamnogalacturonan lyase, domain III||Carbohydrate-binding-like fold||Galactose mutarotase-like domain||Galactose-binding domain-like||Rhamnogalacturonase B||Carboxypeptidase, regulatory domain
AFLA_041890	137.6929169	366.3435329	-1.4117	0.0020852	0.015998	-//-
AFLA_041920	265.9525263	84.97951367	1.646	0.0005742	0.0058053	-	Ankyrin repeat-containing domain||Mg2+ transporter protein, CorA-like/Zinc transport protein ZntB||Ankyrin repeat
AFLA_042140	36.07597911	5.125777991	2.8152	0.00090364	0.0083439	-	Translation protein, beta-barrel domain||Translation elongation factor EFTu/EF1A, C-terminal||Translation elongation factor EF1A/initiation factor IF2gamma, C-terminal||P-loop containing nucleoside triphosphate hydrolase||Transcription factor, GTP-binding domain
AFLA_042250	104.5627137	25.23369548	2.0509	0.0005929	0.0059323	-	Heterokaryon incompatibility
AFLA_042260	49.5294157	12.49582675	1.9868	0.0057903	0.034486	-//-
AFLA_042360	7375.981322	0	Inf	7.85E-22	2.82E-19	-	Isoprenoid synthase domain
AFLA_042370	13608.62485	0	Inf	7.77E-26	4.88E-23	-	Isoprenoid synthase domain
AFLA_042390	24058.21841	200.624389	6.9059	1.18E-30	1.23E-27	-	Glyceraldehyde 3-phosphate dehydrogenase, NAD(P) binding domain||Glyceraldehyde/Erythrose phosphate dehydrogenase family||Glyceraldehyde-3-phosphate dehydrogenase, type I||Glyceraldehyde 3-phosphate dehydrogenase, active site||Glyceraldehyde 3-phosphate dehydrogenase, catalytic domain||NAD(P)-binding domain
AFLA_042460	93.31731773	3.918452125	4.5738	3.96E-10	2.79E-08	-	Dienelactone hydrolase||Alpha/Beta hydrolase fold
AFLA_042470	26.97035523	0.451854376	5.8994	5.98E-05	0.00090447	-	Major facilitator superfamily||Major facilitator superfamily domain
AFLA_042480	40.97371908	1.708592664	4.5838	2.87E-06	7.00E-05	-	NAD(P)-binding domain||Alcohol dehydrogenase superfamily, zinc-type||Alcohol dehydrogenase, C-terminal||Alcohol dehydrogenase, N-terminal||Polyketide synthase, enoylreductase domain||GroES-like
AFLA_042490	333.406721	71.33312584	2.2246	8.08E-06	0.00016732	-	Uncharacterised conserved protein UCP036630||PEP-utilising enzyme, mobile domain||Domain of unknown function DUF126||Aconitase/3-isopropylmalate dehydratase large subunit, alpha/beta/alpha, subdomain 1/3||Domain of unknown function DUF521||Aconitase/3-isopropylmalate dehydratase, swivel
AFLA_042500	41.82574557	3.318360485	3.6558	0.0052065	0.031964	-	Alpha/Beta hydrolase fold||Alpha/beta hydrolase fold-3
AFLA_042510	51.42542441	3.268948064	3.9756	8.49E-06	0.00017341	-//-
AFLA_042560	303.5859736	109.5716685	1.4702	0.001955	0.015165	-	Phytanoyl-CoA dioxygenase
AFLA_042720	70.76797493	11.97743638	2.5628	0.00011979	0.0016031	-	Histidine phosphatase superfamily||Histidine phosphatase superfamily, clade-1
AFLA_042840	430.8409675	97.77955493	2.1396	6.46E-06	0.00013773	-	Protein-tyrosine phosphatase, low molecular weight, mammalian||Phosphotyrosine protein phosphatase I superfamily||Protein-tyrosine phosphatase, low molecular weight
AFLA_042860	848.9843255	2005.722804	-1.2403	0.0042605	0.02733	-	RNA polymerase-associated protein Rtf1||Plus-3 domain
AFLA_043020	79.31974316	363.3064107	-2.1954	3.81E-06	8.95E-05	-	FAD dependent oxidoreductase||FAD/NAD(P)-binding domain
AFLA_043070	9.860022331	951.5465156	-6.5925	0.0018276	0.014391	-	Zinc finger C2H2-type/integrase DNA-binding domain||Zinc finger, C2H2-like||Zinc finger, C2H2
AFLA_043080	71.28033889	7.688666987	3.2127	4.35E-06	0.00010021	-	Methylated-DNA-[protein]-cysteine S-methyltransferase, active site||Winged helix-turn-helix DNA-binding domain||Methylated-DNA-[protein]-cysteine S-methyltransferase, DNA binding
AFLA_043090	76.40060352	487.9770355	-2.6752	1.68E-08	7.61E-07	-	Major facilitator superfamily domain||Major facilitator, sugar transporter-like||Sugar/inositol transporter
AFLA_043150	4229.046293	1756.3614	1.2677	0.002524	0.018509	-	Ribosomal protein S10, conserved site||Ribosomal protein S10, eukaryotic/archaeal||Ribosomal protein S10 domain||Ribosomal protein S10
AFLA_043240	873.7169611	249.1795005	1.81	5.55E-05	0.00085118	-	Prefoldin alpha-like||Prefoldin||Prefoldin subunit 3
AFLA_043260	81.756366	15.78440845	2.3728	0.00017948	0.0022376	-	Transcription factor domain, fungi
AFLA_043280	129.2435716	0.854296332	7.2411	1.09E-16	2.08E-14	-	Glycosyl hydrolases family 2, sugar binding domain||Glycoside hydrolase, catalytic domain||Glycoside hydrolase, family 2, immunoglobulin-like beta-sandwich||Glycoside hydrolase superfamily||Glycoside hydrolase family 2, catalytic domain||Glycoside hydrolase, family 2/20, immunoglobulin-like beta-sandwich domain||Galactose-binding domain-like
AFLA_043480	704.6892348	122.2469771	2.5272	7.02E-08	2.65E-06	-	Phosphatidylglycerol lysyltransferase, C-terminal
AFLA_043610	657.8699521	2152.465816	-1.7101	7.55E-05	0.0011	-	ClpP/crotonase-like domain||Crotonase superfamily||Enoyl-CoA hydratase/isomerase, conserved site
AFLA_043620	286.8496898	810.2812507	-1.4981	0.00078691	0.0074635	-	Sugar transporter, conserved site||Major facilitator superfamily domain||Sugar/inositol transporter||Major facilitator, sugar transporter-like
AFLA_043630	111.454644	490.0280251	-2.1364	1.13E-05	0.00022102	-//-
AFLA_043660	225.6845832	82.64131964	1.4494	0.0032215	0.02222	-	Extracellular mutant protein 11, C-terminal
AFLA_043690	1208.31772	387.6482045	1.6402	0.00030016	0.0034168	-	Phosphoribosylglycinamide formyltransferase||Formyl transferase, N-terminal
AFLA_043800	68.47268405	19.68071688	1.7987	0.005339	0.032586	-	Ureohydrolase domain||Ureohydrolase
AFLA_043820	1778.947227	772.5327309	1.2034	0.0067829	0.039065	-	DNA polymerase alpha catalytic subunit, N-terminal domain||Ribonuclease H-like domain||DNA-directed DNA polymerase, family B, conserved site||DNA-directed DNA polymerase, family B, multifunctional domain||DNA polymerase alpha catalytic subunit||DNA polymerase, palm domain||Zinc finger, DNA-directed DNA polymerase, family B, alpha||DNA-directed DNA polymerase, family B||DNA-directed DNA polymerase…
AFLA_043830	534.814796	140.3288921	1.9302	3.27E-05	0.0005421	-	Thiaminase-2/PQQC||Ribokinase-like||Haem oxygenase-like, multi-helical||Pyridoxamine kinase/Phosphomethylpyrimidine kinase||Hydroxymethylpyrimidine kinase/phosphomethylpyrimidine kinase
AFLA_043850	5.966563555	32.73201954	-2.4557	0.0028016	0.020011	-	Beta-lactamase-related||Beta-lactamase/transpeptidase-like
AFLA_044130	202.4034967	492.3007458	-1.2823	0.0045399	0.028656	-//-
AFLA_044170	7820.972171	3009.955903	1.3776	0.00090138	0.0083353	-	Ribosomal protein S11||Ribosomal S11, conserved site
AFLA_044180	189.2646172	53.22335639	1.8303	0.00025247	0.0029652	-	A1 cistron-splicing factor, AAR2
AFLA_044330	1789.037793	552.7035475	1.6946	0.0001284	0.0016896	-	NAD(P)-binding domain||NAD-dependent epimerase/dehydratase, N-terminal domain
AFLA_044460	30.72820962	300.1845754	-3.2882	4.74E-05	0.000742	-	AMP-dependent synthetase/ligase||AMP-binding enzyme C-terminal domain||AMP-binding, conserved site
AFLA_044510	658.7550707	1639.537949	-1.3155	0.0028025	0.020011	-	Chromatin SPT2
AFLA_044520	8934.865021	2082.612101	2.1011	1.19E-06	3.26E-05	-	Ribosomal protein L12 family
AFLA_044580	909.3991301	2314.704647	-1.3478	0.0016211	0.013017	-//-
AFLA_044720	2338.620248	183.0680322	3.6752	5.14E-14	6.59E-12	-	Purine-cytosine permease Fcy2/21/22||Purine-cytosine permease
AFLA_044730	857.1236511	2469.293879	-1.5265	0.00041769	0.0044598	-	Aldolase-type TIM barrel||Nitronate monooxygenase
AFLA_044820	8533.867719	2381.498917	1.8413	2.24E-05	0.00039796	-	Phosphoglucose isomerase (PGI)||Phosphoglucose isomerase, C-terminal||Phosphoglucose isomerase, conserved site
AFLA_044850	224.7018708	59.05753935	1.9278	8.71E-05	0.0012416	-	Rhodanese-like domain
AFLA_044920	418.9504009	153.914783	1.4446	0.0018187	0.014338	-	Protein kinase domain||Protein kinase-like domain||Serine/threonine-protein kinase, active site
AFLA_044930	945.0141527	328.8359011	1.523	0.00069567	0.0067562	-	Heavy metal-associated domain, HMA||Superoxide dismutase (Cu/Zn) / superoxide dismutase copper chaperone||Superoxide dismutase 1 copper chaperone||Superoxide dismutase, copper/zinc binding domain
AFLA_045020	1288.168406	19904.56181	-3.9497	7.56E-06	0.00015738	-	Pyridoxal phosphate-dependent transferase||Pyridoxal phosphate-dependent transferase, major region, subdomain 1||Aspartate/other aminotransferase||Aminotransferases, class-I, pyridoxal-phosphate-binding site||Aminotransferase, class I/classII
AFLA_045030	13.22266766	65.60502886	-2.3108	0.00052005	0.0053746	-//-
AFLA_045090	675.7505249	2131.574236	-1.6574	0.0026391	0.019204	-	Zinc finger, RING-type||Zinc finger, RING/FYVE/PHD-type
AFLA_045170	209.4371421	64.1836913	1.7062	0.00079352	0.0075132	-	Alpha/beta hydrolase fold-1||Epoxide hydrolase-like||Alpha/Beta hydrolase fold
AFLA_045290	1079.417914	193.5254587	2.4797	0.0051372	0.031631	-	Glycoside hydrolase superfamily||Cellulose-binding domain, fungal||Glycoside hydrolase, catalytic domain||Glycoside hydrolase, family 5
AFLA_045310	1320.851339	584.0336923	1.1773	0.0058588	0.034812	-	TB2/DP1/HVA22-related protein
AFLA_045500	2.389729366	53.22743714	-4.4773	1.83E-07	6.36E-06	-	Cytochrome P450
AFLA_045550	12.63450852	0.451854376	4.8054	0.0057894	0.034486	-//-
AFLA_045680	167.5085605	44.20612594	1.9219	0.00014717	0.001895	-	GNAT domain||Acyl-CoA N-acyltransferase
AFLA_045730	3767.685565	977.1362432	1.947	6.48E-06	0.00013773	-	ATPase, F1 complex, epsilon subunit, mitochondrial
AFLA_045760	125.3642379	301.4657237	-1.2659	0.0075828	0.042579	-	Mg2+ transporter protein, CorA-like/Zinc transport protein ZntB||Alpha/Beta hydrolase fold
AFLA_045790	9000.811962	3336.953634	1.4315	0.00061503	0.0060955	-	Ribosomal protein L30e, conserved site||50S ribosomal protein L30e-like||Ribosomal protein L30e||Ribosomal protein L7Ae/L30e/S12e/Gadd45
AFLA_045840	82.64842355	21.85867509	1.9188	0.0011139	0.0098238	-	Adenosine/AMP deaminase domain||Adenosine/AMP deaminase active site||Adenine deaminase type 2||Adenosine/adenine deaminase||Metal-dependent hydrolase
AFLA_045850	969.7986686	295.0982659	1.7165	9.90E-05	0.0013814	-	GTP cyclohydrolase 1 type 2/Nif3
AFLA_045890	145.7045501	36.35432547	2.0028	0.00027887	0.003239	-	S-adenosyl-L-methionine-dependent methyltransferase||SNF2-related, N-terminal domain||P-loop containing nucleoside triphosphate hydrolase||Helicase, C-terminal||Helicase superfamily 1/2, ATP-binding domain
AFLA_045930	762.9643182	178.5546018	2.0953	5.64E-06	0.00012311	-	S-adenosyl-L-methionine-dependent methyltransferase||Arginine N-methyltransferase 2||Ankyrin repeat-containing domain||Arginine N-methyltransferase 2-like domain
AFLA_045940	73.3974691	13.13300393	2.4825	0.00020694	0.0025151	-//-
AFLA_045960	54.53465889	1159.231435	-4.4099	9.86E-15	1.44E-12	-	10TM putative phosphate transporter, cytosolic domain||Calcium-dependent channel, 7TM region, putative phosphate
AFLA_045980	1851.586723	9017.42405	-2.284	0.0028224	0.020118	-	Alpha/Beta hydrolase fold||WD40-like Beta Propeller||Six-bladed beta-propeller, TolB-like||Peptidase S9, prolyl oligopeptidase, catalytic domain
AFLA_046160	74.06242205	7.57020851	3.2903	2.49E-06	6.26E-05	-//-
AFLA_046190	1305.553421	44.29485125	4.8814	4.50E-11	3.62E-09	-	Nickel/cobalt transporter, high-affinity
AFLA_046210	629.3404105	148.1422208	2.0869	0.0028341	0.020168	-//-
AFLA_046230	796.6476215	11295.84706	-3.8257	0.00030955	0.0034986	-	Amino acid permease/ SLC12A domain||Amino acid/polyamine transporter I
AFLA_046360	6957.044844	1778.044683	1.9682	6.54E-06	0.00013875	-	Biotin carboxylase-like, N-terminal domain||ATP-grasp fold, subdomain 2||Biotin carboxylase, C-terminal||ATP-grasp fold, subdomain 1||Rudiment single hybrid motif||Carboxyl transferase||Acetyl-coenzyme A carboxyltransferase, C-terminal||Pre-ATP-grasp domain||Carbamoyl-phosphate synthetase large subunit-like, ATP-binding domain||Biotin/lipoyl attachment||Acetyl-CoA carboxylase, central domain||Ace…
AFLA_046380	678.3176142	2000.665827	-1.5604	0.00033843	0.0037571	-//-
AFLA_046470	1054.234424	234.4804963	2.1687	2.86E-06	7.00E-05	-	WW domain
AFLA_046520	2168.123708	594.1568474	1.8675	2.83E-05	0.00047984	-	Anillin homology domain||Pleckstrin homology domain||PH domain-like
AFLA_046560	289.8022579	117.2700338	1.3052	0.0073508	0.041622	-	Maltose/galactoside acetyltransferase||Trimeric LpxA-like||Hexapeptide transferase, conserved site||Hexapeptide repeat
AFLA_046600	906.4304313	390.1042732	1.2163	0.0063555	0.037166	-	WD40/YVTN repeat-like-containing domain||WD40-repeat-containing domain||Anaphase-promoting complex subunit 4, WD40 domain||WD40 repeat
AFLA_046650	288.5939143	104.2282789	1.4693	0.002099	0.01606	-	Orotidine 5'-phosphate decarboxylase domain||Ribulose-phosphate binding barrel||Orotidine 5'-phosphate decarboxylase||Aldolase-type TIM barrel||Orotidine 5'-phosphate decarboxylase, active site
AFLA_046660	97.0509291	295.8347487	-1.608	0.00062875	0.006207	-	Mitochondrial substrate/solute carrier||Mitochondrial carrier domain
AFLA_046740	1004.655947	67.86534501	3.8879	8.24E-16	1.42E-13	-	Malic enzyme, NAD-binding||Malic enzyme, N-terminal domain||Malic oxidoreductase||Malic enzyme, conserved site||NAD(P)-binding domain
AFLA_046760	101.0093965	1408.234762	-3.8013	0.00030772	0.0034862	-	6-phosphogluconate dehydrogenase C-terminal domain-like||Glycerol-3-phosphate dehydrogenase, NAD-dependent, C-terminal||NAD(P)-binding domain||Glycerol-3-phosphate dehydrogenase, NAD-dependent, N-terminal||Glycerol-3-phosphate dehydrogenase, NAD-dependent||6-phosphogluconate dehydrogenase, domain 2
AFLA_046820	928.3861216	365.9163186	1.3432	0.0026071	0.019037	-	Tubulin binding cofactor A
AFLA_046850	8795.861113	3333.643839	1.3997	0.00086723	0.0080733	-	Zinc-binding ribosomal protein||Ribosomal protein L44e
AFLA_046880	1253.329046	6235.255492	-2.3147	0.0030879	0.021499	-	Domain of unknown function DUF3824
AFLA_047040	24.73027658	2.16044704	3.5169	0.0010324	0.0092677	-	BRCT domain
AFLA_047060	1313.387532	2984.243275	-1.1841	0.0068401	0.039359	-	Acyl transferase/acyl hydrolase/lysophospholipase||Patatin/Phospholipase A2-related
AFLA_047160	487.9628326	1167.388291	-1.2584	0.0029182	0.020568	-	Cytochrome b5, heme-binding site||Cytochrome b5-like heme/steroid binding domain
AFLA_047240	2355.065208	5324.750757	-1.1769	0.0044356	0.028138	-	Cysteine synthase/cystathionine beta-synthase, pyridoxal-phosphate attachment site||Cystathionine beta-synthase||CBS domain||Tryptophan synthase beta subunit-like PLP-dependent enzyme
AFLA_047300	675.5780469	240.7273849	1.4887	0.0012256	0.010528	-	Serine/threonine-protein kinase, active site||Protein kinase, ATP binding site||Protein kinase-like domain||Protein kinase domain||Aurora kinase
AFLA_047350	2589.53424	8418.87503	-1.7009	0.00032812	0.0036588	-	Creatinase/Aminopeptidase P, N-terminal||Peptidase M24, structural domain||Aminopeptidase P, N-terminal||Creatinase/Aminopeptidase P/Spt16, N-terminal
AFLA_047380	1308.653003	3180.775263	-1.2813	0.0027772	0.01989	-	MIT
AFLA_048060	3024.894721	6833.974755	-1.1758	0.0052999	0.032428	-	P-loop containing nucleoside triphosphate hydrolase||Myosin-like IQ motif-containing domain||Dilute domain||IQ motif, EF-hand binding site||Myosin head, motor domain
AFLA_048070	1173.574527	477.542455	1.2972	0.0032257	0.022231	-	Inosine triphosphate pyrophosphatase-like||Inosine triphosphate pyrophosphatase||Ham1-like protein
AFLA_048380	479.2443671	1658.407635	-1.791	6.99E-05	0.00103	-//-
AFLA_048390	38.39757625	143.7631554	-1.9046	0.00043343	0.0045849	-//-
AFLA_048430	22.05962077	68.1012177	-1.6263	0.0085675	0.046389	-//-
AFLA_048550	107.6711477	18.68102168	2.527	2.53E-05	0.0004357	-	DNA repair protein, Swi5
AFLA_048790	2727.190731	1199.428562	1.1851	0.0061603	0.036243	-	BAR domain||Arfaptin homology (AH) domain/BAR domain
AFLA_048810	16621.54872	7604.520456	1.1281	0.0059249	0.035089	-	Ribosomal protein L2, domain 3||Ribosomal protein L2||Nucleic acid-binding, OB-fold||Ribosomal Proteins L2, RNA binding domain||Translation protein SH3-like domain||Ribosomal protein L2 domain 2||Ribosomal protein L2, conserved site||Ribosomal protein L2, C-terminal
AFLA_048840	3154.422705	795.6762155	1.9871	5.45E-06	0.00011959	-	Adenosine kinase||Carbohydrate kinase PfkB||Ribokinase-like
AFLA_048950	25.85824079	1.609767822	4.0057	0.00039574	0.004258	-	Cytochrome P450, E-class, group I||Cytochrome P450
AFLA_048960	49.89505871	7.673830041	2.7009	0.00056519	0.0057419	-	Major facilitator superfamily domain||Major facilitator superfamily
AFLA_049060	262.3493411	3656.630791	-3.801	0.0044377	0.028138	-//-
AFLA_049070	1536.501027	91384.79507	-5.8942	6.38E-05	0.00095439	-	P-type ATPase, transmembrane domain||P-type ATPase, cytoplasmic domain N||HAD-like domain||P-type ATPase, A domain||P-type ATPase, phosphorylation site||P-type ATPase, subfamily IID||P-type ATPase||Cation-transporting P-type ATPase, C-terminal
AFLA_049080	3072.360385	1194.574373	1.3629	0.0015464	0.012611	-	Biotin synthase/Biotin biosynthesis bifunctional protein BioAB||Elongator protein 3/MiaB/NifB||Radical SAM||Biotin and thiamin synthesis-associated domain||Biotin synthase||Aldolase-type TIM barrel
AFLA_049090	1741.812706	719.1080726	1.2763	0.0030633	0.021364	-	Dethiobiotin synthase BioD||Aminotransferase class-III||Pyridoxal phosphate-dependent transferase, major region, subdomain 2||Pyridoxal phosphate-dependent transferase, major region, subdomain 1||Pyridoxal phosphate-dependent transferase||P-loop containing nucleoside triphosphate hydrolase
AFLA_049100	351.552202	70.15061791	2.3252	2.27E-06	5.75E-05	-	Aminotransferase, class-II, pyridoxal-phosphate binding site||Aminotransferase, class I/classII||Pyridoxal phosphate-dependent transferase, major region, subdomain 1||Pyridoxal phosphate-dependent transferase||Pyridoxal phosphate-dependent transferase, major region, subdomain 2
AFLA_049110	155.5176002	47.08506382	1.7237	0.00094225	0.0085993	-	FAD/NAD(P)-binding domain||FAD dependent oxidoreductase
AFLA_049140	51.79980349	6.851658393	2.9184	0.00023142	0.0027645	-	Major facilitator superfamily||Major facilitator superfamily domain
AFLA_049170	69.78387642	9.757760105	2.8383	3.90E-05	0.00062764	-	Protein of unknown function DUF917||Hydantoinaseoxoprolinase, N-terminal||Protein of unknown function DUF917, C-terminal||Hydantoinase/oxoprolinase||Protein of unknown function DUF917, N-terminal
AFLA_049190	153.593173	28.19155551	2.4458	9.71E-06	0.00019589	-	Berberine/berberine-like||FAD-binding, type 2||FAD linked oxidase, N-terminal
AFLA_049260	21.85302463	95.47054229	-2.1272	0.00029198	0.0033497	-	Major facilitator superfamily domain||Sugar/inositol transporter||Major facilitator, sugar transporter-like
AFLA_049310	39.85621563	764.3337017	-4.2613	0.00033704	0.0037483	-//-
AFLA_049340	98.05535502	16.01428771	2.6142	3.82E-05	0.00061911	-	NADP-dependent oxidoreductase domain||Aldo/keto reductase/potassium channel subunit beta||Aldo/keto reductase
AFLA_049370	860.4613931	258.1124603	1.7371	0.00012739	0.0016807	-	Short-chain dehydrogenase/reductase SDR||NAD(P)-binding domain||Short-chain dehydrogenase/reductase, conserved site
AFLA_049380	504.6574394	140.0389628	1.8495	6.33E-05	0.0009495	-	Glutamine synthetase, beta-Grasp domain||Glutamine synthetase, catalytic domain||Glutamine synthetase/guanido kinase, catalytic domain
AFLA_049390	3295.729455	12936.10938	-1.9727	6.08E-06	0.00013086	-	Malate synthase||Malate synthase, conserved site||Malate synthase A||Malate synthase-like
AFLA_049420	216.6914556	679.9075313	-1.6497	0.00023883	0.0028368	-	Glycoside hydrolase family 3||Glycoside hydrolase superfamily||Glycoside hydrolase, family 3, N-terminal||Glycoside hydrolase family 3 C-terminal domain||Fibronectin type III-like domain
AFLA_049430	514.9494847	89.9104211	2.5179	0.00058947	0.0059121	-//-
AFLA_049520	14.2983494	148.687846	-3.3784	7.13E-05	0.0010488	-//-
AFLA_049530	14.64740807	909.7412843	-5.9567	0.0075493	0.042467	-	Carboxylesterase type B, active site||Alpha/Beta hydrolase fold||Carboxylesterase, type B
AFLA_049660	81.65051723	1246.034304	-3.9317	5.56E-11	4.43E-09	-	Protein of unknown function DUF3425
AFLA_049670	21.68458587	225.1770823	-3.3763	6.83E-07	2.02E-05	-	NAD(P)-binding domain||Short-chain dehydrogenase/reductase SDR
AFLA_049780	170.4279685	440.4156328	-1.3697	0.0033883	0.023004	-	Luciferase-like domain||Nitrilotriacetate monooxygenase component A/pristinamycin IIA synthase subunit A
AFLA_049850	205.2134084	73.48136455	1.4817	0.0024744	0.018196	-	UDP-N-acetylmuramate--L-alanine ligase||Mur ligase, central||Mur ligase, N-terminal catalytic domain||NAD(P)-binding domain||Mur ligase, C-terminal
AFLA_049960	66.28562244	302.527368	-2.1903	6.21E-06	0.00013338	-//-
AFLA_049980	644.3163411	1736.115367	-1.43	0.001151	0.010059	-	Leucine-rich repeat domain, L domain-like||SCF E3 ubiquitin ligase complex F-box protein GrrA/Grr1||F-box domain||Leucine-rich repeat, cysteine-containing subtype
AFLA_050040	1027.871794	2462.109207	-1.2602	0.0039158	0.025497	-	DnaJ domain, conserved site||DnaJ domain
AFLA_050180	338.2787125	74.23977933	2.1879	6.99E-06	0.00014694	-	Ccc1 family
AFLA_050220	70.41492189	20.59479422	1.7736	0.0028613	0.020282	-	NAD(P)-binding domain||NmrA-like domain
AFLA_050290	367.7142283	1837.510423	-2.3211	0.0040099	0.026016	-	Amidohydrolase-related||Metal-dependent hydrolase||Metal-dependent hydrolase, composite domain
AFLA_050480	223.8969189	78.73562762	1.5077	0.0029573	0.020785	-	ESCRT-II complex, vps25 subunit||Winged helix-turn-helix DNA-binding domain||ESCRT-II complex, Vps25 subunit, N-terminal winged helix
AFLA_050550	715.5717534	292.3332928	1.2915	0.003737	0.024614	-	Dna2/Cas4, domain of unknown function DUF83||P-loop containing nucleoside triphosphate hydrolase||DNA replication factor Dna2, N-terminal
AFLA_050560	149.2705935	55.02865144	1.4397	0.0035298	0.023684	-	Ribonuclease P, Rpp40
AFLA_050610	950.9457572	19.82142395	5.5842	3.49E-22	1.37E-19	-	Phosphoesterase
AFLA_050630	1954.512109	256.6502002	2.9289	0.0046321	0.029067	-	Dihydroxy-acid/6-phosphogluconate dehydratase||Dihydroxy-acid/6-phosphogluconate dehydratase, conserved site||Aconitase/3-isopropylmalate dehydratase, swivel||Dihydroxy-acid dehydratase
AFLA_050760	884.8437629	353.3345796	1.3244	0.0031287	0.021731	-	Peptidyl-prolyl cis-trans isomerase, PpiC-type
AFLA_050770	139.7318544	356.7435122	-1.3522	0.0040191	0.026062	-	Alpha-ketoglutarate-dependent dioxygenase alkB homologue 6||Alpha-ketoglutarate-dependent dioxygenase AlkB-like||Oxoglutarate/iron-dependent dioxygenase
AFLA_050800	7569.278855	2358.010251	1.6826	6.77E-05	0.0010017	-	50S ribosomal protein L30e-like||Ribosomal protein L7Ae/L30e/S12e/Gadd45||Ribosomal protein S12e
AFLA_050820	60.0562604	263.5417166	-2.1336	2.88E-05	0.00048712	-	Mandelate racemase/muconate lactonizing enzyme, N-terminal domain||Mandelate racemase/muconate lactonizing enzyme, C-terminal||Enolase C-terminal domain-like||Mandelate racemase/muconate lactonizing enzyme, conserved site||Mandelate racemase/muconate lactonizing enzyme/methylaspartate ammonia-lyase||Enolase N-terminal domain-like
AFLA_050940	2412.622411	1029.040464	1.2293	0.0038824	0.025319	-	Putative DNA-binding domain||tRNA synthetase, B5-domain||B3/B4 tRNA-binding domain||Phenylalanyl-tRNA synthetase, class IIc, beta subunit, archae/euk cytosolic||Phenylalanyl-tRNA synthetase, B3/B4
AFLA_050970	24.30475839	90.53461473	-1.8972	0.0011107	0.0098024	-	Transcription factor domain, fungi
AFLA_050980	41.5236506	128.4595	-1.6293	0.0023866	0.017715	-	NmrA-like domain||NAD(P)-binding domain
AFLA_051020	474.5628048	76.73596817	2.6286	4.53E-08	1.81E-06	-	Armadillo-type fold
AFLA_051050	411.6422208	1404.783796	-1.7709	6.92E-05	0.0010203	-	START-like domain||START domain
AFLA_051070	94.23002848	15.24638445	2.6277	2.16E-05	0.00038718	-	Adenosine deaminase/editase
AFLA_051140	82.0635987	3453.608542	-5.3952	9.20E-27	6.80E-24	-	Glycoside hydrolase, family 3, active site||Glycoside hydrolase family 3 C-terminal domain||Glycoside hydrolase, family 3, N-terminal||Fibronectin type III-like domain||Glycoside hydrolase family 3||Glycoside hydrolase superfamily
AFLA_051220	1062.296928	334.7234046	1.6661	0.00019143	0.0023655	-//-
AFLA_051260	83.92570844	294.603214	-1.8116	0.0081375	0.044814	-//-
AFLA_051360	627.5408988	17852.5552	-4.8303	3.55E-10	2.57E-08	-	Protein of unknown function DUF4449
AFLA_051370	1558.468247	683.2657955	1.1896	0.0047551	0.029686	-	Class I PurE||ATP-grasp fold, ATP-dependent carboxylate-amine ligase-type||Phosphoribosylaminoimidazole carboxylase, ATPase subunit||ATP-grasp fold||Pre-ATP-grasp domain||Phosphoribosylaminoimidazole carboxylase, fungi/plant||Rudiment single hybrid motif||ATP-grasp fold, subdomain 1||ATP-grasp fold, subdomain 2||PurE domain
AFLA_051480	440.9283585	1166.506161	-1.4036	0.0013224	0.011213	-	Peptidase C19, ubiquitin carboxyl-terminal hydrolase||Ubiquitin specific protease domain||Ubiquitin specific protease, conserved site
AFLA_051530	1551.165213	7805.868635	-2.3312	0.0035058	0.023575	-	Aldehyde dehydrogenase N-terminal domain||Aldehyde dehydrogenase domain||Aldehyde dehydrogenase, C-terminal||Methylmalonate-semialdehyde dehydrogenase||Aldehyde dehydrogenase, cysteine active site||Aldehyde/histidinol dehydrogenase
AFLA_051550	782.6726394	185.4407307	2.0775	5.87E-06	0.0001267	-	Class II aldolase/adducin N-terminal||Methylthioribulose-1-phosphate dehydratase||Methylthioribulose-1-phosphate dehydratase, eukaryotes
AFLA_051600	1028.85524	2536.608839	-1.3019	0.0027388	0.019697	-//-
AFLA_051730	1544.371918	537.1552012	1.5236	0.00052099	0.0053754	-//-
AFLA_051910	28.59849371	4.78005521	2.5808	0.0057573	0.03436	-//-
AFLA_051920	317.0586113	88.54208421	1.8403	0.00019937	0.0024404	-	Major facilitator superfamily domain||Major facilitator superfamily
AFLA_052040	170.8311748	418.6989781	-1.2933	0.0056549	0.033942	-	NADH dehydrogenase [ubiquinone] 1 alpha subcomplex subunit 12
AFLA_052100	789.4064343	274.0379178	1.5264	0.0006502	0.0063786	-	HAD hydrolase, subfamily IA||HAD-like domain
AFLA_052220	3176.015963	7352.701063	-1.2111	0.004235	0.027209	-	TRP-like family||FAD/NAD(P)-binding domain||ML-like domain
AFLA_052250	98.96154617	965.5049785	-3.2863	4.76E-10	3.19E-08	-	Protein of unknown function DUF3602
AFLA_052400	1095.041702	4733.296255	-2.1119	0.0032838	0.02249	-	Isocitrate lyase||Pyruvate/Phosphoenolpyruvate kinase-like domain||Isocitrate lyase/phosphorylmutase, conserved site
AFLA_052430	711.5016691	1610.312271	-1.1784	0.0067257	0.038753	-	Neutral trehalase Ca2+ binding||Glycoside hydrolase, family 37, conserved site||Glycoside hydrolase, family 37||Six-hairpin glycosidase-like
AFLA_052490	325.8406227	64.93533939	2.3271	0.0050669	0.03126	-	Zinc finger C2H2-type/integrase DNA-binding domain||Zinc finger, C2H2-like||Zinc finger, C2H2
AFLA_052570	2151.358246	791.5314228	1.4425	0.00095504	0.0087097	-	Serine/threonine-protein kinase, active site||Protein kinase, ATP binding site||Mitogen-activated protein (MAP) kinase, conserved site||Protein kinase domain||Protein kinase-like domain
AFLA_052580	628.310068	1415.344212	-1.1716	0.0073953	0.041769	-//-
AFLA_052610	499.6617456	3856.273293	-2.9482	0.00015478	0.0019807	-	Coenzyme A transferase active site||3-oxoacid CoA-transferase, subunit A||Coenzyme A transferase family I||3-oxoacid CoA-transferase, subunit B||3-oxoacid CoA-transferase
AFLA_052640	1743.524959	4508.19686	-1.3705	0.0014671	0.012131	-	PH domain-like||Pleckstrin homology domain||Phosphatidylinositol 4,5-bisphosphate-binding protein Slm1/Slm2
AFLA_052830	828.1164597	301.4142528	1.4581	0.0015361	0.012552	-	SprT-like
AFLA_052840	784.6723274	277.809788	1.498	0.00060569	0.0060267	-	Mog1/PsbP, alpha/beta/alpha sandwich||Ran-interacting Mog1 protein
AFLA_052860	3486.480649	19344.20548	-2.4721	1.75E-08	7.81E-07	-	Heat shock protein, 9/12, fungi||Heat shock protein 9/12
AFLA_052930	22.6791494	104.8231269	-2.2085	0.00048008	0.005011	-	FAD-dependent oxidoreductase 2, FAD binding domain||Uncharacterised conserved protein UCP036654||FAD/NAD(P)-binding domain
AFLA_052960	220.2530873	64.59278334	1.7697	0.00052366	0.0053986	-	Glycosyl transferase, family 8||Nucleotide-diphospho-sugar transferases
AFLA_053030	28.73802223	4.624511194	2.6356	0.0041628	0.0268	-	NmrA-like domain||NAD(P)-binding domain
AFLA_053070	518.187657	66.18575593	2.9689	1.36E-09	8.10E-08	-	Aspartic peptidase domain||Aspartic peptidase, active site||Peptidase family A1 domain||Aspartic peptidase A1 family
AFLA_053080	90.40037753	24.95952882	1.8567	0.0021391	0.016312	-//-
AFLA_053160	1682.451525	32811.6179	-4.2856	2.55E-05	0.00043841	-	FAD/NAD(P)-binding domain||Formyl transferase, N-terminal
AFLA_053170	451.4303214	3106.809718	-2.7829	0.00025227	0.0029652	-	Tetrahydrofolate dehydrogenase/cyclohydrolase, catalytic domain||Tetrahydrofolate dehydrogenase/cyclohydrolase, NAD(P)-binding domain||NAD(P)-binding domain
AFLA_053200	0.501243137	84.55515145	-7.3982	7.01E-06	0.00014694	-	Homoserine dehydrogenase, catalytic||NAD(P)-binding domain||Aspartate/homoserine dehydrogenase, NAD-binding||Homoserine dehydrogenase, conserved site||Homoserine dehydrogenase lacking ACT domain
AFLA_053210	5.992539772	1014.06623	-7.4028	0.00015769	0.0020139	-	Aldehyde dehydrogenase domain||Aldehyde dehydrogenase N-terminal domain||Aldehyde dehydrogenase, C-terminal||Aldehyde/histidinol dehydrogenase
AFLA_053260	164.6110855	4217.643601	-4.6793	7.74E-22	2.82E-19	-//-
AFLA_053310	451.0377035	22.54253119	4.3225	1.06E-15	1.79E-13	-	Major facilitator superfamily||Major facilitator superfamily domain
AFLA_053330	3711.796791	59.26750227	5.9687	4.44E-30	3.99E-27	-//-
AFLA_053340	186.5607884	46.15141212	2.0152	8.25E-05	0.0011905	-	Thiamine pyrophosphate enzyme, central domain||Thiamine pyrophosphate enzyme, N-terminal TPP-binding domain||DHS-like NAD/FAD-binding domain||Thiamine pyrophosphate enzyme, C-terminal TPP-binding||Thiamin diphosphate-binding fold
AFLA_053410	29.77081764	1081.239896	-5.1826	2.64E-23	1.23E-20	-//-
AFLA_053420	2.343574729	30.26087207	-3.6907	0.00063144	0.0062189	-	Six-bladed beta-propeller, TolB-like||LDLR class B repeat
AFLA_053550	16.56473004	118.3747368	-2.8372	1.86E-06	4.82E-05	-	Protein of unknown function DUF3425
AFLA_053600	29.56667648	145.5525353	-2.2995	0.0071991	0.040937	-	NAD(P)-binding domain
AFLA_053630	38.06437159	5.881249481	2.6942	0.0013028	0.01107	-	NAD(P)-binding domain||Short-chain dehydrogenase/reductase, conserved site||Short-chain dehydrogenase/reductase SDR
AFLA_053680	1.831875098	173.0920514	-6.5621	1.18E-19	3.31E-17	-//-
AFLA_053710	2.901428997	43.44012169	-3.9042	0.0026246	0.019121	-	Cytochrome P450
AFLA_053760	444.7340026	1081.676255	-1.2823	0.0034916	0.02354	-	Zn(2)-C6 fungal-type DNA-binding domain
AFLA_053890	7.839200024	47.86725226	-2.6103	0.00042546	0.004535	-	Carboxylesterase type B, active site||Alpha/Beta hydrolase fold||Carboxylesterase, type B
AFLA_054020	896.1377515	292.7012895	1.6143	0.00023295	0.0027775	-	Alpha/Beta hydrolase fold||Lipase EstA/Esterase EstB
AFLA_054140	239.608166	78.46468696	1.6106	0.0010011	0.0090481	-//-
AFLA_054150	21.56816979	0	Inf	0.0011431	0.010011	-	Major facilitator superfamily domain||Major facilitator superfamily
AFLA_054240	36.44921483	1213.777395	-5.0575	3.82E-23	1.71E-20	-//-
AFLA_054260	5.009167312	32.34937538	-2.6911	0.0016565	0.013243	-	Major facilitator superfamily domain||Major facilitator superfamily
AFLA_054320	17.92819637	2.111034619	3.0862	0.0094371	0.049956	-	Necrosis inducing protein
AFLA_054350	873.2917368	360.001093	1.2785	0.0037017	0.024437	-	Villin/Gelsolin||ADF-H/Gelsolin-like domain||Gelsolin-like domain
AFLA_054360	20.89163402	188.2454063	-3.1716	1.50E-08	6.99E-07	-	S-adenosyl-L-methionine-dependent methyltransferase
AFLA_054380	4.017137534	30.44101058	-2.9218	0.0012718	0.010865	-//-
AFLA_054390	42.74465439	174.1026077	-2.0261	9.16E-05	0.0012925	-	Transcription factor domain, fungi
AFLA_054460	1.606495178	106.6075343	-6.0522	0.00012256	0.0016281	-//-
AFLA_054470	78.05806102	2217.249215	-4.8281	3.27E-22	1.32E-19	-	Chitinase II||LysM domain||Glycoside hydrolase superfamily||Chitinase insertion domain||Glycoside hydrolase, catalytic domain||Glycoside hydrolase family 18, catalytic domain||Chitin-binding, type 1
AFLA_054490	489.4567123	4010.374062	-3.0345	2.73E-08	1.14E-06	-	Amino acid transporter, transmembrane domain
AFLA_054530	64.92869274	16.77963529	1.9521	0.0022362	0.016868	-	Major facilitator superfamily||Major facilitator superfamily domain
AFLA_054760	6510.803334	2730.59303	1.2536	0.0028307	0.020155	-	Ribosomal protein L28e||Ribosomal L28e/Mak16
AFLA_054800	370.5759115	89.44350634	2.0507	2.48E-05	0.00043218	-	Zinc finger, C2H2||Zinc finger C2H2-type/integrase DNA-binding domain||Zinc finger, C2H2-like
AFLA_054880	323.7286812	75.95573802	2.0916	1.37E-05	0.00025914	-	Ubiquitin-related modifier 1||Molybdopterin synthase/thiamin biosynthesis sulphur carrier, beta-grasp||Beta-grasp domain
AFLA_054950	919.0637773	284.5118685	1.6917	0.00018772	0.0023242	-	AAA+ ATPase domain||P-loop containing nucleoside triphosphate hydrolase||ATPase, AAA-type, core
AFLA_054960	52.91689815	224.0824196	-2.0822	0.00011244	0.0015165	-	Amidase||Amidase signature domain
AFLA_055060	826.7047474	15899.09453	-4.2654	0.0045886	0.028905	-	D-isomer specific 2-hydroxyacid dehydrogenase, NAD-binding domain conserved site 1||D-isomer specific 2-hydroxyacid dehydrogenase, catalytic domain||D-isomer specific 2-hydroxyacid dehydrogenase, NAD-binding domain conserved site||D-isomer specific 2-hydroxyacid dehydrogenase, NAD-binding domain||NAD(P)-binding domain||NAD-dependent formate dehydrogenase
AFLA_055160	934.0173088	3278.472443	-1.8115	0.0016275	0.013052	-	ADC synthase||Glutamine amidotransferase||Chorismate-utilising enzyme, C-terminal||Class I glutamine amidotransferase-like||Anthranilate synthase component I, N-terminal||Para-aminobenzoate synthase
AFLA_055180	239.8280739	92.15279285	1.3799	0.0034972	0.023552	-	LOG family||Cytokinin riboside 5'-monophosphate phosphoribohydrolase LOG
AFLA_055240	2811.319164	1214.899154	1.2104	0.0043154	0.027557	-	Phosphoribosylformylglycinamidine cyclo-ligase||Phosphoribosylglycinamide synthetase, ATP-grasp (A) domain||ATP-grasp fold, subdomain 2||PurM-like, N-terminal domain||Phosphoribosylglycinamide synthetase, N-terminal||ATP-grasp fold, subdomain 1||Rudiment single hybrid motif||Pre-ATP-grasp domain||AIR synthase-related protein, C-terminal domain||Phosphoribosylglycinamide synthetase, C-domain||ATP-…
AFLA_055260	683.5778375	2210.409147	-1.6931	0.00010311	0.0014208	-	Leucine-rich repeat domain, L domain-like||Pleckstrin homology domain
AFLA_055290	129.5345543	39.47552877	1.7143	0.0022503	0.016923	-//-
AFLA_055440	192.9935571	586.2901695	-1.6031	0.00035236	0.0038775	-	FCP1 homology domain||HAD-like domain
AFLA_055450	9699.001419	3576.187308	1.4394	0.0009135	0.0083984	-	Translation elongation factor EF1B, gamma chain, conserved||Thioredoxin-like fold||Glutathione S-transferase, N-terminal||Glutathione S-transferase, C-terminal||Glutathione S-transferase, C-terminal-like
AFLA_055530	125.5168312	348.1597904	-1.4719	0.0015725	0.012766	-	Nucleotide-diphospho-sugar transferases||Alpha-mannosyltransferase
AFLA_055560	759.0470209	2493.437045	-1.7159	9.44E-05	0.0013281	-	E3 ubiquitin ligase, BRE1
AFLA_055570	840.5703974	1851.007046	-1.1389	0.0072517	0.041162	-	SANT/Myb domain||Transcription factor TFIIIB component B, fungi||Transcription factor TFIIIB component B''||Homeodomain-like
AFLA_055580	98.8764868	263.783371	-1.4157	0.0063868	0.037297	-	Store-operated calcium entry-associated regulatory factor
AFLA_055600	1610.821001	626.9524257	1.3614	0.0020997	0.01606	-	1,2-dihydroxy-3-keto-5-methylthiopentene dioxygenase, eukaryotes||RmlC-like jelly roll fold||RmlC-like cupin domain||Acireductone dioxygenase ARD family
AFLA_055730	308.9791674	117.8845291	1.3901	0.0033115	0.02258	-//-
AFLA_056170	495.8128445	2236.768668	-2.1735	0.0052315	0.032102	-	Class I glutamine amidotransferase-like||Catalase, mono-functional, haem-containing, clade 2||Catalase haem-binding site||Catalase-like domain||Catalase immune-responsive domain||Catalase core domain||Catalase active site||Catalase, mono-functional, haem-containing
AFLA_056240	105.8667797	29.13485987	1.8614	0.0011284	0.0099024	-	Protein kinase-like domain||Protein of unknown function DUF227
AFLA_056280	24.59254724	318.5226429	-3.6951	0.00354	0.023726	-//-
AFLA_056350	2675.614329	7637.177287	-1.5132	0.0045655	0.028788	-	MmgE/PrpD||2-methylcitrate dehydratase PrpD
AFLA_056380	1.627408167	21.102816	-3.6968	0.0010366	0.0092799	-//-
AFLA_056450	326.3094827	1360.246928	-2.0596	4.42E-06	0.00010134	-//-
AFLA_056460	557.0807276	3850.047393	-2.7889	1.04E-05	0.00020586	-	CheY-like superfamily||Histidine kinase domain||Signal transduction histidine kinase, dimerisation/phosphoacceptor domain||Histidine kinase-like ATPase, C-terminal domain||Signal transduction response regulator, receiver domain
AFLA_056580	529.3500206	198.9451691	1.4119	0.0013982	0.011675	-//-
AFLA_056700	1637.839404	457.24476	1.8408	2.45E-05	0.00042864	-	Domain of unknown function DUF89
AFLA_056800	598.1278378	3869.524989	-2.6936	1.56E-09	9.15E-08	-	HSP40/DnaJ peptide-binding||Chaperone DnaJ, C-terminal
AFLA_056830	932.2063617	230.4914411	2.0159	9.32E-06	0.0001889	-	Ribonuclease III domain
AFLA_056840	73.54319994	691.1322465	-3.2323	8.32E-06	0.00017146	-	Ysc84 actin-binding domain
AFLA_056910	640.1276924	166.4324825	1.9434	2.52E-05	0.0004357	-	Organic solute transporter subunit alpha/Transmembrane protein 184
AFLA_056940	150.3415377	15.10561811	3.3151	2.54E-08	1.07E-06	-	FAD dependent oxidoreductase||FAD/NAD(P)-binding domain
AFLA_056960	20.70774578	91.37801606	-2.1417	0.0005742	0.0058053	-//-
AFLA_057090	39.90090113	127.8002384	-1.6794	0.0044605	0.028229	-	HotDog domain||Thioesterase domain
AFLA_057140	871.1091807	324.902986	1.4228	0.0018432	0.014478	-	NAD-dependent epimerase/dehydratase, N-terminal domain||NAD(P)-binding domain
AFLA_057250	65.98892499	266.6742618	-2.0148	4.79E-05	0.00074822	-//-
AFLA_057260	719.9962067	1838.752319	-1.3527	0.0018172	0.014338	-	Protein of unknown function DUF2985
AFLA_057330	28.785646	90.06590584	-1.6456	0.0037751	0.024812	-//-
AFLA_057400	65.55221147	439.9531205	-2.7466	0.0085746	0.046389	-	HPP
AFLA_057410	1119.059052	367.0722028	1.6082	0.00031107	0.0035123	-	Oxidoreductase, C-terminal||NAD(P)-binding domain||Oxidoreductase, N-terminal
AFLA_057610	714.6953672	88.3915147	3.0153	0.0065908	0.038169	-	Copper amine oxidase, N3-terminal||Copper amine oxidase||Copper amine oxidase, N2-terminal||Copper amine oxidase, N-terminal||Copper amine oxidase, C-terminal
AFLA_057670	11.76868698	999.9371662	-6.4088	0.00013004	0.0017073	-	Metallopeptidase, catalytic domain||Lysine-specific metallo-endopeptidase||Peptidase M35, deuterolysin
AFLA_057680	130.559823	298.9538042	-1.1952	0.0083767	0.045631	-	Chitobiase/beta-hexosaminidase domain 2-like||Beta-hexosaminidase||Glycoside hydrolase superfamily||Beta-hexosaminidase, bacteial type, N-terminal||Glycoside hydrolase family 20, catalytic domain||Glycoside hydrolase, catalytic domain
AFLA_057710	36.03587782	81415.82497	-11.142	5.17E-06	0.00011459	-	Pyruvate/Phosphoenolpyruvate kinase-like domain||Isocitrate lyase/phosphorylmutase, conserved site
AFLA_057730	8.439210308	2261.715429	-8.0661	3.00E-05	0.00050322	-	Protein of unknown function DUF1275
AFLA_057780	347.0541658	1024.877614	-1.5622	0.00046256	0.0048604	-	FAD-binding domain||FAD/NAD(P)-binding domain
AFLA_057920	90.81748117	2.464064153	5.2039	0.0001736	0.0021773	-	Ankyrin repeat-containing domain||Ankyrin repeat
AFLA_057980	378.9422328	2473.552239	-2.7065	2.44E-09	1.37E-07	-	Domain of unknown function DUF4440||NTF2-like domain
AFLA_058020	336.3606389	82.64644466	2.025	3.30E-05	0.00054454	-	Short-chain dehydrogenase/reductase SDR||NAD(P)-binding domain
AFLA_058030	18.26679855	70.82187806	-1.955	0.0069612	0.039928	-	Major facilitator superfamily||Major facilitator superfamily domain
AFLA_058110	836.7222138	251.1838837	1.736	0.00018653	0.002314	-	RmlC-like cupin domain||RmlC-like jelly roll fold
AFLA_058130	361.4108127	965.9515932	-1.4183	0.0016023	0.012907	-	Zinc finger, LIM-type
AFLA_058140	271.4651936	66.34103088	2.0328	3.56E-05	0.00058059	-//-
AFLA_058150	10596.46957	1531.304063	2.7908	2.51E-05	0.0004357	-	NAD(P)-binding domain||Myo-inositol-1-phosphate synthase, GAPDH-like||Myo-inositol-1-phosphate synthase
AFLA_058190	171.5040462	31.80873642	2.4307	5.43E-06	0.00011926	-//-
AFLA_058270	75.56475256	18.76986554	2.0093	0.0013398	0.011346	-	Heterokaryon incompatibility
AFLA_058310	5340.698568	2439.62771	1.1304	0.0080378	0.044381	-	Alcohol dehydrogenase, zinc-type, conserved site||Polyketide synthase, enoylreductase domain||NAD(P)-binding domain||Alcohol dehydrogenase, N-terminal||GroES-like||Alcohol dehydrogenase, C-terminal||Alcohol dehydrogenase superfamily, zinc-type||Alcohol dehydrogenase class III/S-(hydroxymethyl)glutathione dehydrogenase
AFLA_058470	40.86262603	283.9019281	-2.7965	3.15E-08	1.30E-06	-	Fatty acid hydroxylase
AFLA_058550	307.0216248	114.223567	1.4265	0.00181	0.014297	-	Copper fist DNA-binding domain
AFLA_058570	1354.194969	553.0328509	1.292	0.0031156	0.02168	-	DEAD/DEAH box helicase domain||Helicase superfamily 1/2, ATP-binding domain||Helicase, C-terminal||ATP-dependent RNA helicase DEAD-box, conserved site||RNA helicase, DEAD-box type, Q motif||P-loop containing nucleoside triphosphate hydrolase
AFLA_058620	15.80134424	186.984902	-3.5648	2.92E-10	2.15E-08	-	FAD-binding 8||Cytochrome b245, heavy chain||Ferric reductase transmembrane component-like domain||Ferredoxin reductase-type FAD-binding domain||Riboflavin synthase-like beta-barrel||Ferric reductase, NAD binding domain
AFLA_058660	171.1851392	2832.967654	-4.0487	2.50E-13	2.83E-11	-	HAD-like domain||P-type ATPase, cytoplasmic domain N||P-type ATPase, transmembrane domain||P-type ATPase||Cation-transporting P-type ATPase, N-terminal||P-type ATPase, subfamily IID||P-type ATPase, phosphorylation site||P-type ATPase, A domain||Cation-transporting P-type ATPase, C-terminal
AFLA_058680	53.05576659	10.10331872	2.3927	0.00077868	0.0074022	-	Isopenicillin N synthase-like||Oxoglutarate/iron-dependent dioxygenase||Non-haem dioxygenase N-terminal domain
AFLA_058800	201.2989579	79.90368622	1.333	0.0091224	0.048683	-	GAF domain||GAF domain-like||Free Met sulfoxide reductase conserved site
AFLA_058820	26.17339624	545.6260317	-4.3817	0.0024055	0.017814	-	Amino acid permease, conserved site||Amino acid/polyamine transporter I
AFLA_058870	11.09075231	0	Inf	0.0036424	0.024206	-	Nitrilotriacetate monooxygenase component A/pristinamycin IIA synthase subunit A||Luciferase-like domain
AFLA_058900	59.13122375	12.41679971	2.2516	0.0012741	0.01087	-	NAD-dependent epimerase/dehydratase, N-terminal domain||NAD(P)-binding domain
AFLA_058940	153.3458027	43.82080755	1.8071	0.00043142	0.0045777	-	Protein phosphatase 2C family||PPM-type phosphatase domain
AFLA_059030	703.2087348	2824.732854	-2.0061	5.77E-06	0.00012509	-//-
AFLA_059040	413.0963591	1616.698015	-1.9685	9.62E-06	0.00019436	-//-
AFLA_059050	147.7008695	701.7077524	-2.2482	1.07E-06	2.95E-05	-//-
AFLA_059060	239.1247825	796.2432364	-1.7354	0.00012614	0.0016687	-	Putative ER transporter, 6TM, N-terminal||Brefeldin A sensitivity protein-related, domain of unknown function DUF2421
AFLA_059290	66.42921981	5.014626268	3.7276	2.20E-05	0.00039314	-//-
AFLA_059460	11.23680893	127.46832	-3.5038	1.05E-08	5.11E-07	-//-
AFLA_059470	15.78223042	9116.502157	-9.174	6.96E-24	3.50E-21	-	Alpha/Beta hydrolase fold||Domain of unknown function DUF676, lipase-like||Tetratricopeptide-like helical domain
AFLA_059480	18.01797616	229.2661962	-3.6695	3.76E-10	2.67E-08	-	Voltage-dependent anion channel
AFLA_059500	17.3303153	112.8707237	-2.7033	4.91E-06	0.00010974	-	Glycoside hydrolase, family 43, endo-1, 5-alpha-L-arabinosidase||Glycosyl hydrolase, five-bladed beta-propellor domain||Glycoside hydrolase, family 43
AFLA_059570	27.25560608	1.227123668	4.4732	0.00011022	0.0015007	-	SMP-30/Gluconolactonase/LRE-like region||Six-bladed beta-propeller, TolB-like
AFLA_059590	1164.481998	2671.205346	-1.1978	0.0088615	0.04753	-	Copper amine oxidase, N3-terminal||Copper amine oxidase||Copper amine oxidase, C-terminal||Copper amine oxidase, N-terminal
AFLA_059750	126.0040195	23.59169808	2.4171	1.95E-05	0.00035087	-	Fringe-like||PAN/Apple domain
AFLA_059810	20.41562827	2.414651732	3.0798	0.0070668	0.040386	-//-
AFLA_059820	38.75456619	921.1443863	-4.571	6.33E-06	0.00013557	-	Polysaccharide lyase
AFLA_059830	120.9520681	651.1613956	-2.4286	0.0014891	0.012255	-	Glucose-methanol-choline oxidoreductase, N-terminal||Glucose-methanol-choline oxidoreductase||FAD/NAD(P)-binding domain||Glucose-methanol-choline oxidoreductase, C-terminal
AFLA_059850	881.236856	2712.129394	-1.6218	0.00020632	0.0025124	-	GAF domain-like||Signal transduction histidine kinase-related protein, C-terminal||Histidine kinase domain||Signal transduction histidine kinase, dimerisation/phosphoacceptor domain||Histidine kinase-like ATPase, C-terminal domain
AFLA_059970	4461.718733	1757.543161	1.344	0.0016221	0.013017	-	NAD(P)-binding domain||Short-chain dehydrogenase/reductase SDR
AFLA_060020	227.4635521	10.76760045	4.4009	1.49E-13	1.75E-11	-	Polyketide product template domain||Acyl transferase||Phosphopantetheine attachment site||Phosphopantetheine binding ACP domain||Polyketide synthase, beta-ketoacyl synthase domain||Polyketide synthase, dehydratase domain||Acyl transferase/acyl hydrolase/lysophospholipase||Acyl transferase domain||Ketoacyl-synthetase, C-terminal extension||Beta-ketoacyl synthase, C-terminal||Malonyl-CoA ACP transa…
AFLA_060030	14982.34221	5046.916391	1.5698	0.00024686	0.0029239	-//-
AFLA_060040	347.2855161	1260.135562	-1.8594	2.21E-05	0.00039398	-//-
AFLA_060050	523.9830352	1681.404008	-1.6821	0.00011018	0.0015007	-	Amino acid/polyamine transporter I||Amino acid permease, conserved site
AFLA_060090	67.42903187	1.708592664	5.3025	1.50E-05	0.00027996	-	Major facilitator superfamily||Major facilitator superfamily domain
AFLA_060100	398.6204241	37.1939034	3.4219	9.00E-05	0.0012703	-//-
AFLA_060150	8951.150622	2985.849228	1.5839	0.000151	0.0019383	-	Ribosomal protein L24/L26, conserved site||Ribosomal protein L2 domain 2||Translation protein SH3-like domain||KOW||Ribosomal protein L26/L24P, eukaryotic/archaeal
AFLA_060220	25.83446402	0	Inf	3.79E-06	8.91E-05	-	HotDog domain
AFLA_060260	151.29142	24089.80793	-7.3149	1.77E-08	7.88E-07	-	Small heat shock protein HSP20||HSP20-like chaperone||Alpha crystallin/Hsp20 domain
AFLA_060300	34044.23231	1849.559365	4.2022	5.73E-07	1.76E-05	-	Acetohydroxy acid isomeroreductase, NADPH-binding domain||Ketol-acid reductoisomerase||6-phosphogluconate dehydrogenase, domain 2||Ketol-acid reductoisomerase, fungi||6-phosphogluconate dehydrogenase C-terminal domain-like||NAD(P)-binding domain||Acetohydroxy acid isomeroreductase C-terminal
AFLA_060490	764.185539	67.31160396	3.505	8.11E-05	0.0011739	-	Tail specific protease||ClpP/crotonase-like domain||FAD/NAD(P)-binding domain
AFLA_060670	590.9465117	1421.720189	-1.2665	0.0081914	0.044953	-//-
AFLA_060760	279.4555263	1804.796129	-2.6911	3.02E-09	1.66E-07	-	Zinc finger, CCCH-type
AFLA_060810	10.44491742	41.10962202	-1.9767	0.0075263	0.042414	-//-
AFLA_060830	27.72474942	2.012209777	3.7843	0.00039286	0.0042305	-	ABC transporter type 1, transmembrane domain
AFLA_060840	30.25081349	3.819627283	2.9855	0.0012209	0.010502	-	ABC transporter-like||P-loop containing nucleoside triphosphate hydrolase||AAA+ ATPase domain
AFLA_060850	42.22863035	2.375220296	4.1521	9.27E-06	0.00018823	-	ABC transporter type 1, transmembrane domain||AAA+ ATPase domain||ABC transporter-like||P-loop containing nucleoside triphosphate hydrolase
AFLA_060870	62.24797645	8.140521364	2.9348	3.23E-05	0.00053699	-//-
AFLA_060880	369.4689305	105.2780431	1.8112	0.00013397	0.0017485	-	Amino acid/polyamine transporter I
AFLA_060890	495.1235208	1133.640365	-1.1951	0.0066961	0.038654	-	Amino acid transporter, transmembrane domain
AFLA_060920	184.5693917	59.91908317	1.6231	0.001495	0.012274	-//-
AFLA_060930	1367.258607	413.7466971	1.7245	0.00011034	0.0015008	-//-
AFLA_061050	1151.671016	4025.284539	-1.8054	0.0018842	0.014698	-//-
AFLA_061060	96.2070809	1123.996154	-3.5464	4.38E-07	1.41E-05	-//-
AFLA_061110	787.0393914	217.5025344	1.8554	0.00012385	0.0016436	-	Fungal lipase-like domain||Alpha/Beta hydrolase fold||Mono-/di-acylglycerol lipase, N-terminal
AFLA_061170	1106.309229	2422.002615	-1.1304	0.008152	0.044854	-	PH domain-like||Dbl homology (DH) domain||Pleckstrin homology domain||Citron homology (CNH) domain
AFLA_061280	386.1523997	1038.296856	-1.427	0.0012011	0.010381	-	NAD(P)-binding domain||Alcohol dehydrogenase superfamily, zinc-type||Alcohol dehydrogenase, N-terminal||Polyketide synthase, enoylreductase domain||GroES-like
AFLA_061380	70.02117345	17.90809829	1.9672	0.0017605	0.013949	-	Acid ceramidase, N-terminal
AFLA_061410	203.101993	47.24278957	2.104	3.54E-05	0.00057929	-	S-adenosyl-L-methionine-dependent methyltransferase
AFLA_061460	53.64646374	8.641788161	2.6341	0.00022735	0.0027314	-	Protein of unknown function DUF3431
AFLA_061590	109.9812897	284.5112391	-1.3712	0.0044362	0.028138	-//-
AFLA_061620	150.6242761	29.1591853	2.3689	3.09E-05	0.00051709	-	GPCR fungal pheromone mating factor, STE3
AFLA_061630	694.8834834	298.9132607	1.217	0.005328	0.032535	-	Nucleic acid-binding, OB-fold||Primosome PriB/single-strand DNA-binding||Single-stranded DNA-binding protein
AFLA_061710	2.220960578	104.1410174	-5.5512	0.0030628	0.021364	-	Calcium/calmodulin-dependent/calcium-dependent protein kinase||Serine/threonine-protein kinase, active site||Protein kinase domain||Protein kinase-like domain
AFLA_061780	491.0717944	180.1939979	1.4464	0.0014023	0.011694	-	Carbon-nitrogen hydrolase
AFLA_061810	165.8041968	36.36136316	2.189	0.0021566	0.016425	-	RlpA-like protein, double-psi beta-barrel domain||Expansin/pollen allergen, DPBB domain||Expansin, cellulose-binding-like domain
AFLA_061880	4073.323489	1498.764106	1.4424	0.00057592	0.005818	-	PdxS/SNZ N-terminal domain||Aldolase-type TIM barrel||Ribulose-phosphate binding barrel||Pyridoxal 5'-phosphate synthase subunit PdxS/SNZ
AFLA_061910	747.3727278	314.8895508	1.247	0.0033591	0.022818	-	Arginine biosynthesis protein ArgJ||ArgJ-like domain
AFLA_061970	231.0398092	798.0850228	-1.7884	0.0015878	0.012822	-//-
AFLA_062020	1006.60337	2223.762444	-1.1435	0.0083698	0.045613	-	Tetratricopeptide-like helical domain||DNA/RNA-binding domain, Est1-type
AFLA_062050	133.3102237	10.41206086	3.6785	0.0063617	0.037185	-	Major facilitator superfamily||Major facilitator superfamily domain
AFLA_062060	72.50141718	350.4475753	-2.2731	0.00057821	0.0058318	-	Zinc finger, RING/FYVE/PHD-type||Zinc finger, RING-type
AFLA_062090	541.2048017	178.6730146	1.5989	0.00047538	0.0049784	-	NUDIX hydrolase, conserved site||NUDIX hydrolase domain||NUDIX hydrolase domain-like||NUDIX hydrolase
AFLA_062120	5687.265053	19674.8039	-1.7905	0.0019561	0.015165	-	Amino acid transporter, transmembrane domain
AFLA_062230	189.3856834	56.09951515	1.7553	0.00045242	0.0047618	-	Dynactin subunit p22
AFLA_062450	110.3987361	40.13904894	1.4596	0.0088306	0.047385	-	Calcineurin-like phosphoesterase domain, apaH type||Metallo-dependent phosphatase-like||Sphingomyelin phosphodiesterase
AFLA_062470	47.39217731	10.86893536	2.1244	0.0029712	0.020848	-	Isoprenoid synthase domain||Terpene synthase, metal-binding domain
AFLA_062490	689.5538909	139.8679962	2.3016	4.99E-07	1.57E-05	-	AP complex, mu/sigma subunit||Longin-like domain||Adaptor protein complex, sigma subunit
AFLA_062500	816.0803476	1813.111253	-1.1517	0.0091367	0.048683	-	Repressor of RNA polymerase III transcription Maf1
AFLA_062610	141.7705769	2.16044704	6.0361	7.09E-13	7.61E-11	-	CinA, C-terminal
AFLA_062700	1091.05008	105.3723996	3.3721	1.85E-05	0.00033619	-	Mitochondrial substrate/solute carrier||Mitochondrial carrier protein||Mitochondrial carrier domain
AFLA_062710	769.01045	338.4321714	1.1841	0.0081083	0.044717	-//-
AFLA_062720	58.51676261	11.42926723	2.3561	0.0005739	0.0058053	-//-
AFLA_062750	47.66617538	6.283691436	2.9233	0.00017709	0.0022122	-//-
AFLA_062880	10.17444747	0	Inf	0.0059462	0.035199	-	Short-chain dehydrogenase/reductase SDR||NAD(P)-binding domain||Short-chain dehydrogenase/reductase, conserved site
AFLA_062920	386.3596474	74.79716791	2.3689	9.06E-07	2.57E-05	-	Mss4-like||Glutathione-dependent formaldehyde-activating enzyme/centromere protein V
AFLA_062960	21.75671673	2.061622198	3.3996	0.0028615	0.020282	-	Zn(2)-C6 fungal-type DNA-binding domain||Fungal transcription factor
AFLA_063060	49.4544913	3.064155793	4.0125	0.0053506	0.032621	-//-
AFLA_063120	89.44158239	9.34784723	3.2582	6.39E-07	1.92E-05	-	CO dehydrogenase flavoprotein-like, FAD-binding, subdomain 2||FAD-binding, type 2||Berberine/berberine-like||FAD linked oxidase, N-terminal
AFLA_063140	12.72681779	0.402441955	4.9829	0.0057186	0.034222	-//-
AFLA_063420	386.6622212	23.06600096	4.0672	9.33E-06	0.0001889	-	Transferase||Chloramphenicol acetyltransferase-like domain
AFLA_063700	60.97135164	12.56024029	2.2793	0.0023208	0.017334	-//-
AFLA_064330	629.5203579	1725.472725	-1.4547	0.0081479	0.044851	-	Zn(2)-C6 fungal-type DNA-binding domain
AFLA_064350	5.454863924	92.0268498	-4.0764	3.39E-05	0.00055765	-	Major facilitator superfamily||Major facilitator superfamily domain
AFLA_064500	1488.154102	296.563141	2.3271	1.35E-07	4.85E-06	-	FAD/NAD(P)-binding domain||Pyridine nucleotide-disulphide oxidoreductase, class-II
AFLA_064710	0.593552411	29.45325466	-5.6329	1.92E-05	0.000347	-	Major facilitator superfamily domain||Major facilitator superfamily
AFLA_064720	11.10373828	1847.278615	-7.3782	2.11E-17	4.48E-15	-	Major facilitator superfamily domain||Major facilitator, sugar transporter-like||Sugar/inositol transporter
AFLA_064830	373.8970566	83.17732608	2.1684	7.85E-06	0.00016269	-	TMEM14 family
AFLA_064840	36.05359699	1248.73057	-5.1142	5.20E-08	2.03E-06	-	Phospholipase A2, prokaryotic/fungal||Phospholipase A2 domain
AFLA_065040	21.2518795	75.3636098	-1.8263	0.0028476	0.020232	-	Protein kinase-like domain||Aminoglycoside phosphotransferase
AFLA_065160	198.137622	0	Inf	1.63E-09	9.43E-08	-//-
AFLA_065170	147.4860399	0.804883911	7.5176	1.28E-06	3.49E-05	-//-
AFLA_065180	2050.940143	609.7502797	1.75	8.45E-05	0.0012131	-	Thioredoxin domain||Thioredoxin, conserved site||Thioredoxin||Thioredoxin-like fold
AFLA_065200	38.44732924	3.318360485	3.5343	8.71E-05	0.0012416	-	P-loop containing nucleoside triphosphate hydrolase
AFLA_065440	0.593552411	59.64061232	-6.6508	2.69E-11	2.30E-09	-//-
AFLA_065590	138.1613087	51.25482297	1.4306	0.0087421	0.047011	-	Short-chain dehydrogenase/reductase SDR||Short-chain dehydrogenase/reductase, conserved site||NAD(P)-binding domain
AFLA_065610	60.90542311	0.804883911	6.2416	7.13E-10	4.64E-08	-	TauD/TfdA-like domain
AFLA_065630	613.4541602	95.58725226	2.6821	0.0053841	0.03276	-	TauD/TfdA-like domain
AFLA_065640	131.3924844	43.59877317	1.5915	0.0037661	0.024779	-	Major facilitator, sugar transporter-like||Sugar/inositol transporter||Major facilitator superfamily domain
AFLA_065690	6.647031974	32.33492604	-2.2823	0.0062969	0.036875	-	Metallo-beta-lactamase
AFLA_065720	183.1508579	556.9057714	-1.6044	0.00032391	0.0036203	-	Aldehyde dehydrogenase, glutamic acid active site||Aldehyde dehydrogenase N-terminal domain||Aldehyde dehydrogenase domain||Aldehyde dehydrogenase, C-terminal||Aldehyde/histidinol dehydrogenase
AFLA_065770	26.86505572	3.869039704	2.7957	0.0032937	0.022508	-	Zinc finger, C2H2||Transcription factor domain, fungi||Zinc finger C2H2-type/integrase DNA-binding domain||Zinc finger, C2H2-like||Zn(2)-C6 fungal-type DNA-binding domain
AFLA_065810	0.250621568	45.66803045	-7.5095	0.0017517	0.013897	-	Major facilitator superfamily domain||Major facilitator superfamily
AFLA_065820	7.301524176	71.97577003	-3.3012	2.52E-06	6.31E-05	-//-
AFLA_065840	182.8100605	1131.261536	-2.6295	6.10E-07	1.84E-05	-//-
AFLA_065860	54.50402397	2.965330951	4.2001	5.92E-07	1.80E-05	-	Alpha/Beta hydrolase fold||RTA-like protein
AFLA_065950	464.9983365	1041.613788	-1.1635	0.0056556	0.033942	-	Heterokaryon incompatibility
AFLA_065960	15820.86632	6165.600175	1.3595	0.0012625	0.010801	-	Fucose-specific lectin
AFLA_066030	198.8194743	1246.417717	-2.6483	0.0085514	0.046361	-//-
AFLA_066050	8.478907072	150.9334777	-4.1539	1.40E-11	1.27E-09	-	Oxoglutarate/iron-dependent dioxygenase||Alpha-ketoglutarate-dependent dioxygenase AlkB-like||Isopenicillin N synthase-like
AFLA_066100	94.83037731	427.2636129	-2.1717	3.59E-06	8.52E-05	-	NAD(P)-binding domain
AFLA_066150	14.63082374	84.01215294	-2.5216	4.97E-05	0.0007737	-	Glycoside hydrolase family 10 domain||Glycoside hydrolase superfamily||Glycoside hydrolase, catalytic domain
AFLA_066300	532.8334468	150.371951	1.8251	0.001175	0.010198	-	Glycoside hydrolase, family 61
AFLA_066330	5514.714314	2620.65111	1.0734	0.0094086	0.049847	-	Fatty acid desaturase domain
AFLA_066380	46.86782174	1.708592664	4.7777	4.62E-07	1.47E-05	-	Ankyrin repeat-containing domain||Ankyrin repeat
AFLA_066420	63.26778588	2.111034619	4.9054	1.19E-08	5.66E-07	-	Major facilitator superfamily domain||Proton-dependent oligopeptide transporter family
AFLA_066430	409.1522468	89.21903481	2.1972	3.45E-06	8.27E-05	-	Saccharopine dehydrogenase, NADP binding domain||Saccharopine dehydrogenase, C-terminal||NAD(P)-binding domain
AFLA_066440	49.61886545	13.06150708	1.9256	0.0043222	0.027572	-	FAD linked oxidase, N-terminal||S-adenosyl-L-methionine-dependent methyltransferase||FAD-binding, type 2||Higher eukaryotic phosphomevalonate kinase||FAD-binding, type 2, subdomain 1
AFLA_066520	18.26786316	0.451854376	5.3373	0.00052087	0.0053754	-//-
AFLA_066620	774.2489575	103.1859262	2.9076	9.64E-10	5.97E-08	-	NAD(P)-binding domain||Alcohol dehydrogenase superfamily, zinc-type||Alcohol dehydrogenase, C-terminal||GroES-like||Polyketide synthase, enoylreductase domain||Alcohol dehydrogenase, N-terminal
AFLA_066700	231.9883373	14.91315272	3.9594	4.41E-10	3.01E-08	-	Cytochrome P450, E-class, group IV||Cytochrome P450
AFLA_066710	175.224135	13.38720862	3.7103	2.97E-07	9.93E-06	-	Non-haem dioxygenase N-terminal domain||Oxoglutarate/iron-dependent dioxygenase||Isopenicillin N synthase-like
AFLA_066720	144.4277229	24.4757732	2.5609	0.00011219	0.0015165	-	AMP-dependent synthetase/ligase||Phosphopantetheine binding ACP domain||Phosphopantetheine attachment site||Condensation domain||AMP-binding, conserved site||Polyketide synthase, phosphopantetheine-binding domain
AFLA_066730	98.72529671	29.66290289	1.7348	0.0029265	0.020604	-	Polyketide synthase, enoylreductase domain||Alcohol dehydrogenase, N-terminal||GroES-like||NAD(P)-binding domain||Alcohol dehydrogenase, C-terminal||Alcohol dehydrogenase superfamily, zinc-type
AFLA_066740	129.4141524	37.42857935	1.7898	0.0082089	0.045009	-	Major facilitator superfamily domain||Major facilitator superfamily
AFLA_066750	75.91707955	21.65365938	1.8098	0.0036099	0.024092	-	Glycoside hydrolase superfamily||Glycoside hydrolase family 3||Fibronectin type III-like domain||Glycoside hydrolase family 3 C-terminal domain||Glycoside hydrolase, family 3, N-terminal
AFLA_066780	20.80544832	1.758005085	3.565	0.0021758	0.016522	-	Polyprenyl synthetase, conserved site||Isoprenoid synthase domain||Polyprenyl synthetase
AFLA_066810	85.40420046	22.93019547	1.8971	0.0017825	0.014097	-//-
AFLA_066880	5.004104084	891.2648891	-7.4766	0.0013685	0.011496	-	Major facilitator superfamily domain||Major facilitator superfamily
AFLA_066890	85.06258125	1033.218127	-3.6025	0.0011181	0.0098468	-	Cytochrome P450
AFLA_066900	42.01502282	1884.960567	-5.4875	4.23E-05	0.00067455	-	Zn(2)-C6 fungal-type DNA-binding domain||Transcription factor domain, fungi
AFLA_066910	2.425427509	194.2719041	-6.3237	0.0013628	0.011475	-	NAD(P)-binding domain
AFLA_066920	10.98005953	367.0471704	-5.063	0.0016645	0.01329	-	Polyketide synthase, enoylreductase domain||GroES-like||NAD(P)-binding domain||Alcohol dehydrogenase superfamily, zinc-type
AFLA_066930	17.82722977	1274.441546	-6.1596	0.0011993	0.010373	-	Cytochrome P450||Cytochrome P450, E-class, group II||Cytochrome P450, conserved site||Cytochrome P450, E-class, CYP52
AFLA_066940	17.70927432	2526.333487	-7.1564	6.80E-05	0.0010056	-	O-methyltransferase COMT-type||Winged helix-turn-helix DNA-binding domain||S-adenosyl-L-methionine-dependent methyltransferase||O-methyltransferase, family 2
AFLA_067130	505.3603219	1392.840493	-1.4626	0.00067267	0.0065683	-	Tubby C-terminal-like domain||LURP1-related protein domain
AFLA_067300	90.52158852	24.89550289	1.8624	0.0015839	0.012817	-	Zn(2)-C6 fungal-type DNA-binding domain||Fungal transcription factor
AFLA_067330	83.8798881	24.79449632	1.7583	0.0039144	0.025497	-	HotDog domain
AFLA_067530	356.4889042	814.9657137	-1.1929	0.005667	0.033994	-	Chitin synthase III catalytic subunit
AFLA_067570	255.3861998	1050.588585	-2.0404	6.95E-06	0.0001464	-	Arrestin C-terminal-like domain
AFLA_067640	2255.209709	458.8472921	2.2972	1.54E-07	5.47E-06	-	FAD/NAD(P)-binding domain
AFLA_067660	122.5932799	11.80454536	3.3765	1.14E-07	4.14E-06	-	Major facilitator superfamily domain||Major facilitator superfamily
AFLA_067670	80.75380949	13.61932889	2.5679	5.03E-05	0.000783	-//-
AFLA_067840	31.55147061	253.1715719	-3.0043	5.37E-09	2.80E-07	-	Sugar transporter, conserved site||Major facilitator superfamily domain||Major facilitator, sugar transporter-like||Sugar/inositol transporter
AFLA_068000	9776.798373	4526.301911	1.111	0.0081301	0.044792	-	Ribosomal protein L1/ribosomal biogenesis protein||Ribosomal protein L1||Ribosomal protein L1-like||Ribosomal protein L1, 2-layer alpha/beta-sandwich||Ribosomal protein L1, 3-layer alpha/beta-sandwich||Ribosomal protein L1, conserved site
AFLA_068080	13.17610849	117.8896085	-3.1614	0.00023012	0.0027542	-	Superoxide dismutase, copper/zinc binding domain||Superoxide dismutase (Cu/Zn) / superoxide dismutase copper chaperone
AFLA_068090	110.9342956	297.8003845	-1.4246	0.0026047	0.019031	-	3-dehydroquinate dehydratase type I||NAD(P)-binding domain||P-loop containing nucleoside triphosphate hydrolase||Shikimate kinase/gluconokinase||Aldolase-type TIM barrel||Shikimate dehydrogenase substrate binding, N-terminal||Quinate/shikimate 5-dehydrogenase/glutamyl-tRNA reductase
AFLA_068130	39.54032561	1.659180243	4.5748	4.34E-06	0.00010021	-	NAD(P)-binding domain||Shikimate dehydrogenase substrate binding, N-terminal
AFLA_068270	1868.602626	653.5046632	1.5157	0.00043339	0.0045849	-	Outer membrane protein/outer membrane enzyme PagP, beta-barrel||Uncharacterised protein family UPF0311
AFLA_068310	780.8481463	2309.029451	-1.5642	0.00031432	0.0035395	-//-
AFLA_068320	1232.439752	65.90897431	4.2249	0.0019778	0.015295	-	F-box domain
AFLA_068370	576.2753413	5610.369008	-3.2833	0.007573	0.042558	-	ClpA/B, conserved site 2||AAA+ ATPase domain||ClpA/B, conserved site 1||Clp ATPase, C-terminal||ATPase, AAA-type, core||P-loop containing nucleoside triphosphate hydrolase||ClpA/B family
AFLA_068410	175.8248181	417.1823922	-1.2465	0.006431	0.037468	-	Fatty acid hydroxylase
AFLA_068600	513.6605257	0	Inf	6.69E-10	4.40E-08	-	Ammonium transporter||Ammonium transporter AmtB-like domain||Ammonium/urea transporter||Ammonium transporter, conserved site||Blood group Rhesus C/E/D polypeptide
AFLA_068610	2028.085637	8.041696521	7.9784	0.0020912	0.016034	-//-
AFLA_068680	1307.234039	4567.68061	-1.8049	0.00019772	0.0024265	-	Cation-transporting P-type ATPase, C-terminal||P-type ATPase, subfamily IIB||P-type ATPase, A domain||P-type ATPase, phosphorylation site||Cation-transporting P-type ATPase, N-terminal||P-type ATPase||P-type ATPase, transmembrane domain||HAD-like domain||P-type ATPase, cytoplasmic domain N
AFLA_068790	1459.674509	510.6810683	1.5152	0.00057341	0.0058053	-	P-loop containing nucleoside triphosphate hydrolase||Adenylyl-sulfate kinase
AFLA_068830	587.2001417	167.4404714	1.8102	0.00058757	0.0058977	-	Glycoside hydrolase-type carbohydrate-binding||Alpha-1,2-mannosidase, putative||Six-hairpin glycosidase-like||Glycosyl hydrolase family 92
AFLA_068840	2600.202838	836.710899	1.6358	0.00017799	0.0022213	-	Glycine cleavage T-protein, C-terminal barrel domain||Glycine cleavage system T protein||Glycine cleavage T-protein-like, N-terminal||Glycine cleavage T-protein/YgfZ, C-terminal domain||GTP-binding protein TrmE/Glycine cleavage system T protein, domain 1||Aminomethyltransferase/Dimethylsulfonioproprionate demethylase DmdA
AFLA_068850	1599.392247	417.5701458	1.9374	1.35E-05	0.00025745	-	Amino acid transporter, transmembrane domain
AFLA_068900	830.016433	220.0049857	1.9156	2.60E-05	0.00044681	-	Prefoldin alpha subunit, archaea-type||Prefoldin||Prefoldin alpha-like
AFLA_068940	310.5089348	79.60235573	1.9638	8.11E-05	0.0011739	-	Ankyrin repeat||Ankyrin repeat-containing domain
AFLA_069010	7233.860129	2986.442195	1.2763	0.0029989	0.020995	-	S-adenosylmethionine synthetase superfamily||S-adenosylmethionine synthetase, C-terminal||S-adenosylmethionine synthetase, conserved site||S-adenosylmethionine synthetase, N-terminal||S-adenosylmethionine synthetase||S-adenosylmethionine synthetase, central domain
AFLA_069220	655.5255577	1717.495506	-1.3896	0.0016577	0.013244	-	Zn(2)-C6 fungal-type DNA-binding domain
AFLA_069320	4338.703558	19763.57312	-2.1875	0.0013951	0.011665	-	ABC transporter type 1, transmembrane domain||AAA+ ATPase domain||ABC transporter, conserved site||ABC transporter-like||P-loop containing nucleoside triphosphate hydrolase
AFLA_069330	9641.612758	54737.4587	-2.5052	1.01E-05	0.00020172	-	Condensation domain||Phosphopantetheine binding ACP domain||Phosphopantetheine attachment site||AMP-binding, conserved site||AMP-dependent synthetase/ligase||Amino acid adenylation domain
AFLA_069370	12610.61079	4805.129801	1.392	0.001107	0.0097904	-	Phosphoglycerate kinase, N-terminal||Phosphoglycerate kinase, C-terminal||Phosphoglycerate kinase||Phosphoglycerate kinase, conserved site
AFLA_069410	3056.382007	1188.208385	1.363	0.0013644	0.011476	-	AAA+ ATPase domain||ABC transporter, conserved site||ABC transporter ABCE||ABC transporter-like||4Fe-4S ferredoxin-type, iron-sulphur binding domain||RNase L inhibitor RLI, possible metal-binding domain||P-loop containing nucleoside triphosphate hydrolase
AFLA_069420	588.3378577	2055.721277	-1.8049	3.94E-05	0.00063379	-	Chromo domain, conserved site||Domain of unknown function DUF4208||Chromo domain-like||SNF2-related, N-terminal domain||P-loop containing nucleoside triphosphate hydrolase||Helicase superfamily 1/2, ATP-binding domain||Helicase, C-terminal||Chromo domain||Chromo/chromo shadow domain
AFLA_069470	805.9882192	1983.837645	-1.2995	0.0026955	0.019468	-//-
AFLA_069590	7000.90818	1855.385851	1.9158	1.34E-05	0.00025534	-	S-adenosyl-L-homocysteine hydrolase, NAD binding domain||S-adenosyl-L-homocysteine hydrolase, conserved site||Adenosylhomocysteinase||NAD(P)-binding domain
AFLA_069610	47.00701596	7.565188382	2.6354	0.0091674	0.048775	-//-
AFLA_069620	129.2491671	6.728403226	4.2637	0.00060884	0.0060533	-//-
AFLA_069670	127.4900297	27.29019266	2.2239	7.77E-05	0.0011295	-	Glycoside hydrolase family 3||Glycoside hydrolase superfamily||Glycoside hydrolase, family 3, N-terminal||Glycoside hydrolase family 3 C-terminal domain||Fibronectin type III-like domain
AFLA_069740	1353.228317	558.083405	1.2779	0.0028419	0.020212	-//-
AFLA_069750	686.0855138	288.8752239	1.2479	0.004084	0.026374	-//-
AFLA_069920	3115.902418	1203.046203	1.373	0.0013002	0.01107	-	TGS-like||GTP binding domain||Domain of unknown function DUF933||P-loop containing nucleoside triphosphate hydrolase||OBG-type guanine nucleotide-binding (G) domain||Ribosome-binding ATPase YchF/Obg-like ATPase 1||Beta-grasp domain||TGS-like domain
AFLA_070000	54.31900515	14.07832585	1.948	0.0040375	0.026154	-//-
AFLA_070020	40.56658865	345.3547546	-3.0897	9.52E-10	5.95E-08	-	Glycoside hydrolase, catalytic domain||Alpha-L-arabinofuranosidase, C-terminal||Glycoside hydrolase superfamily
AFLA_070030	2.599589564	19.01425341	-2.8707	0.0073493	0.041622	-	Major facilitator superfamily domain||Major facilitator, sugar transporter-like
AFLA_070060	362.3645615	9456.525803	-4.7058	1.26E-05	0.00024225	-//-
AFLA_070070	272.1876605	2278.417898	-3.0654	1.21E-11	1.11E-09	-	Ribosomal protein L2 domain 2||Translation protein SH3-like domain
AFLA_070090	108.0037668	0	Inf	5.80E-17	1.14E-14	-	Thioredoxin-like fold||DSBA-like thioredoxin domain
AFLA_070200	11.93132793	46.81089716	-1.9721	0.0061995	0.036415	-	Polyketide cyclase SnoaL-like domain||Heterokaryon incompatibility||NTF2-like domain
AFLA_070230	32.53484307	142.8007555	-2.1339	6.71E-05	0.00099482	-//-
AFLA_070250	540.0014917	35.71731246	3.9183	2.88E-14	3.90E-12	-	Alpha/Beta hydrolase fold||Alpha/beta hydrolase fold-1
AFLA_070310	19.82746913	0.451854376	5.4555	0.00027795	0.0032313	-//-
AFLA_070320	55.6913886	292.8282261	-2.3945	8.68E-07	2.48E-05	-	Amino acid/polyamine transporter I
AFLA_070330	234.7395174	927.2748417	-1.9819	0.0028769	0.020369	-	Kinesin light chain||Tetratricopeptide repeat||Tetratricopeptide-like helical domain
AFLA_070440	244.5206741	57.09898691	2.0984	3.37E-05	0.00055514	-//-
AFLA_070490	6.160573991	541.6331527	-6.4581	1.08E-19	3.15E-17	-//-
AFLA_070530	56.92765657	0.451854376	6.9771	3.74E-10	2.67E-08	-	ABC-2 type transporter||P-loop containing nucleoside triphosphate hydrolase||ABC transporter-like||CDR ABC transporter||AAA+ ATPase domain||ABC transporter, conserved site
AFLA_070540	264.5944617	104.2371817	1.3439	0.0039541	0.025733	-	Zn(2)-C6 fungal-type DNA-binding domain
AFLA_070590	26.39877616	3.466597749	2.9289	0.0026623	0.019317	-	Threonyl/alanyl tRNA synthetase, class II-like, putative editing domain||Threonyl/alanyl tRNA synthetase, SAD||Translation protein, beta-barrel domain||Alanyl-tRNA synthetase, class IIc, core domain||Alanyl-tRNA synthetase, class IIc, N-terminal
AFLA_070610	115.1943789	35.68279625	1.6908	0.0019255	0.014965	-	Leucine-rich repeat domain, L domain-like
AFLA_070660	108.6328598	15.93280988	2.7694	0.00018839	0.0023302	-	CO dehydrogenase flavoprotein-like, FAD-binding, subdomain 2||FAD-binding, type 2||FAD-binding, type 2, subdomain 1||FAD linked oxidase, N-terminal
AFLA_070810	49.33254574	1165.363006	-4.5621	7.66E-07	2.22E-05	-	Carboxylesterase type B, active site||Carboxylesterase type B, conserved site||Carboxylesterase, type B||Alpha/Beta hydrolase fold
AFLA_070820	293.176024	5400.393723	-4.2032	1.80E-06	4.68E-05	-	Pyruvate carboxyltransferase||Aldolase-type TIM barrel||Crotonase superfamily||ClpP/crotonase-like domain||Enoyl-CoA hydratase/isomerase, conserved site
AFLA_070830	450.4555807	192.6187271	1.2256	0.0056117	0.033824	-	Ankyrin repeat||Ankyrin repeat-containing domain
AFLA_070860	47.29334419	9805.744257	-7.6958	2.16E-43	1.36E-39	-	Phosphopantetheine binding ACP domain||Phosphopantetheine attachment site||Condensation domain||AMP-binding, conserved site||AMP-dependent synthetase/ligase||Alpha/Beta hydrolase fold||Thioesterase||AMP-binding enzyme C-terminal domain||Amino acid adenylation domain||Polyketide synthase, phosphopantetheine-binding domain
AFLA_070870	41.82222598	4937.209436	-6.8833	4.11E-37	6.46E-34	-	Oxoglutarate/iron-dependent dioxygenase||Non-haem dioxygenase N-terminal domain||Isopenicillin N synthase, conserved site||Isopenicillin N synthase-like
AFLA_070880	27.64036716	5874.195768	-7.7315	1.21E-38	3.79E-35	-	Peptidase C45
AFLA_070980	92.55214127	247.4380333	-1.4187	0.0032905	0.022508	-	Transcription factor domain, fungi||Zn(2)-C6 fungal-type DNA-binding domain
AFLA_071050	239.3542676	543.8526492	-1.1841	0.0057882	0.034486	-	Transcription factor domain, fungi
AFLA_071090	1880.236748	603.9152661	1.6385	0.0052729	0.032324	-	Immunoglobulin E-set
AFLA_071140	99.47350135	388.7002827	-1.9663	2.13E-05	0.00038123	-//-
AFLA_071180	1268.047182	14638.66563	-3.5291	2.73E-09	1.52E-07	-	Indoleamine 2,3-dioxygenase
AFLA_071210	501.0328408	1748.384681	-1.803	0.0010897	0.0096707	-	Immunoglobulin E-set||Arrestin-like, N-terminal
AFLA_071330	34.07680011	92.24080222	-1.4366	0.0087601	0.047086	-//-
AFLA_071370	23.02787804	76.73417404	-1.7365	0.005137	0.031631	-	P-loop containing nucleoside triphosphate hydrolase||AAA+ ATPase domain||DNA repair Rad51/transcription factor NusA, alpha-helical||DNA recombination and repair protein RecA, monomer-monomer interface||DNA recombination and repair protein, RecA-like||Meiotic recombinase Dmc1||DNA recombination and repair protein Rad51, C-terminal||DNA recombination and repair protein RecA-like, ATP-binding domain
AFLA_071480	378.0355584	1076.264949	-1.5094	0.00068121	0.0066311	-//-
AFLA_071550	195.5770945	51.25002628	1.9321	0.005116	0.031531	-	Clr5 domain
AFLA_071680	827.5248301	358.4309801	1.2071	0.0061045	0.035949	-	Heterokaryon incompatibility Het-C
AFLA_072150	2.665592583	19.42667635	-2.8655	0.0087125	0.046925	-	Cytochrome P450||Cytochrome P450, E-class, group IV
AFLA_072160	0.511699631	22.87843716	-5.4825	0.0044306	0.028135	-	Metallo-beta-lactamase
AFLA_072340	87.02653688	14.07118327	2.6287	2.51E-05	0.00043494	-	GroES-like||Alcohol dehydrogenase, N-terminal||Alcohol dehydrogenase, zinc-type, conserved site||Alcohol dehydrogenase class III/S-(hydroxymethyl)glutathione dehydrogenase||NAD(P)-binding domain||Alcohol dehydrogenase, C-terminal||Alcohol dehydrogenase superfamily, zinc-type
AFLA_072350	4.452377651	568.3754714	-6.9961	0.0034398	0.023291	-	Cerato-platanin
AFLA_072510	174.1789605	59.46433112	1.5505	0.0034525	0.023352	-//-
AFLA_072520	186.5523909	46.4057217	2.0072	0.00014312	0.0018465	-	6-phosphogluconate dehydrogenase, domain 2||NAD(P)-binding domain||6-phosphogluconate dehydrogenase, NADP-binding||3-hydroxyisobutyrate dehydrogenase, NAD-binding domain||6-phosphogluconate dehydrogenase C-terminal domain-like||3-hydroxyisobutyrate dehydrogenase-related
AFLA_072550	0.593552411	134.6670145	-7.8258	5.11E-06	0.00011346	-	Flavin monooxygenase-like||FAD/NAD(P)-binding domain
AFLA_072560	43.07932818	1217.559562	-4.8209	1.36E-06	3.66E-05	-	Hydantoinase/oxoprolinase||Hydantoinaseoxoprolinase, N-terminal||Hydantoinase B/oxoprolinase
AFLA_072570	629.4046782	2289.760345	-1.8631	0.00091083	0.0083918	-//-
AFLA_072680	4479.23397	1085.447615	2.045	0.0013919	0.011648	-//-
AFLA_072690	39.4534096	5.125777991	2.9443	0.00039148	0.0042229	-//-
AFLA_072700	73.71769203	15.92299306	2.2109	0.00059203	0.0059283	-	Cutinase, monofunctional||Cutinase/acetylxylan esterase||Alpha/Beta hydrolase fold
AFLA_072710	58.74940521	294.7501653	-2.3268	0.0023428	0.017453	-//-
AFLA_072720	387.5821138	1934.381588	-2.3193	0.0011743	0.010198	-//-
AFLA_072750	80.4873339	17.45618464	2.205	0.0008032	0.0075828	-	Pyrroline-5-carboxylate reductase, catalytic, N-terminal||NAD(P)-binding domain||Pyrroline-5-carboxylate reductase, dimerisation domain||Pyrroline-5-carboxylate reductase||6-phosphogluconate dehydrogenase C-terminal domain-like
AFLA_072810	0	104.8732553	#NAME?	5.38E-19	1.33E-16	-//-
AFLA_072920	177.4191364	35.53013626	2.32	1.71E-05	0.00031513	-	Amino acid transporter, transmembrane domain
AFLA_072980	13.79996578	354.7322893	-4.684	9.58E-09	4.71E-07	-	Sugar transporter, conserved site||Major facilitator superfamily domain||Major facilitator superfamily
AFLA_072990	0.250621568	33.09274343	-7.0449	1.15E-07	4.16E-06	-	Aminotransferase, class I/classII||Pyridoxal phosphate-dependent transferase, major region, subdomain 1||Pyridoxal phosphate-dependent transferase||Pyridoxal phosphate-dependent transferase, major region, subdomain 2
AFLA_073030	893.5480946	41.98371616	4.4116	3.04E-18	7.08E-16	-	Amino acid/polyamine transporter I
AFLA_073060	63.0150351	340.3919713	-2.4334	0.00058606	0.0058893	-	Glycosyltransferase family 28, N-terminal domain||UDP-glucuronosyl/UDP-glucosyltransferase
AFLA_073110	41.76554035	119.834612	-1.5207	0.0058827	0.034921	-//-
AFLA_073190	121.9702976	392.3658591	-1.6857	0.00083084	0.0078054	-	Alpha/Beta hydrolase fold||Partial AB-hydrolase lipase domain
AFLA_073210	2757.97857	272.3644204	3.34	7.96E-08	2.98E-06	-	RmlC-like cupin domain||Cupin 1||Bicupin, oxalate decarboxylase/oxidase||RmlC-like jelly roll fold
AFLA_073270	238.9194406	86.62429019	1.4637	0.0029598	0.020792	-	Protein of unknown function DUF2458
AFLA_073290	1685.195985	393.1189964	2.0999	1.57E-06	4.13E-05	-	DHAP synthase, class 1||DAHP synthetase I/KDSA||Aldolase-type TIM barrel
AFLA_073360	92.19794061	7.310819523	3.6566	1.56E-07	5.52E-06	-//-
AFLA_073380	44.92698281	3.819627283	3.5561	2.92E-05	0.00049281	-	Alpha/beta hydrolase fold-1||Alpha/Beta hydrolase fold
AFLA_073390	30.69324604	0.402441955	6.253	3.27E-06	7.86E-05	-	Short-chain dehydrogenase/reductase, conserved site||NAD(P)-binding domain||Short-chain dehydrogenase/reductase SDR
AFLA_073460	4052.117839	1747.738673	1.2132	0.0039963	0.025941	-	S-adenosyl-L-methionine-dependent methyltransferase
AFLA_073470	785.3544779	349.7837385	1.1669	0.0078494	0.043621	-//-
AFLA_073480	4953.221206	1637.707947	1.5967	0.00024456	0.0028994	-	Tropomyosin
AFLA_073550	546.2708485	165.6272246	1.7217	0.00016028	0.0020366	-	LSM domain||LSM domain, eukaryotic/archaea-type
AFLA_073600	660.4876763	200.7771811	1.7179	0.00012961	0.0017038	-	Cytochrome P450, conserved site||Cytochrome P450, E-class, group I||Cytochrome P450
AFLA_073630	931.5121024	337.2964336	1.4656	0.001412	0.011752	-	Protein kinase-like domain||Protein kinase domain||Protein kinase, ATP binding site
AFLA_073670	533.1078005	133.3979696	1.9987	3.42E-05	0.00056169	-	Metal-dependent hydrolase||Amidohydrolase-related
AFLA_073740	880.2556234	315.5342901	1.4801	0.00075018	0.0071692	-	Geranylgeranyl transferase type-2 subunit beta||Terpenoid cyclases/protein prenyltransferase alpha-alpha toroid||PFTB repeat
AFLA_073780	274.1519141	4011.777362	-3.8712	4.55E-06	0.00010334	-//-
AFLA_073800	329.6891786	1702.005359	-2.3681	1.09E-07	3.99E-06	-	Short-chain dehydrogenase/reductase SDR||NAD(P)-binding domain||Short-chain dehydrogenase/reductase, conserved site
AFLA_073840	63.94179216	17.38703369	1.8787	0.0032205	0.02222	-	Cation-transporting P-type ATPase, C-terminal||P-type ATPase||Cation-transporting P-type ATPase, N-terminal||P-type ATPase, phosphorylation site||P-type ATPase, A domain||P-type ATPase, cytoplasmic domain N||HAD-like domain||P-type ATPase, transmembrane domain
AFLA_073860	143.5928791	54.37057292	1.4011	0.0076955	0.042957	-	Telomerase ribonucleoprotein complex - RNA-binding domain||Reverse transcriptase domain||Telomerase reverse transcriptase
AFLA_074070	557.2119712	48.20114066	3.5311	1.95E-12	1.93E-10	-	Major facilitator superfamily||Major facilitator superfamily domain
AFLA_074150	119.0681383	292.4410068	-1.2964	0.0075396	0.042467	-	G protein-coupled receptor GPR1, C-terminal||Glucose receptor Git3, N-terminal
AFLA_074210	0	75.29003611	#NAME?	9.62E-05	0.0013508	-//-
AFLA_074220	230.5663287	71.88151844	1.6815	0.00078339	0.0074414	-	Ubiquitin-conjugating enzyme E2||Ubiquitin-conjugating enzyme/RWD-like||Poly(ADP-ribose) polymerase, catalytic domain
AFLA_074260	60.81564758	4.419718923	3.7824	8.78E-07	2.50E-05	-	Alpha-ketoglutarate-dependent dioxygenase AlkB-like||Oxoglutarate/iron-dependent dioxygenase
AFLA_074280	45.25193468	122.5687028	-1.4375	0.005955	0.035233	-	WD40/YVTN repeat-like-containing domain||Lactonase, 7-bladed beta propeller||Nitrous oxide reductase, N-terminal
AFLA_074290	25.2340492	84.40226801	-1.7419	0.0025837	0.01891	-	Lactonase, 7-bladed beta propeller||WD40/YVTN repeat-like-containing domain
AFLA_074530	93.85859619	20.37461323	2.2037	0.0003504	0.0038593	-	Nucleotide-diphospho-sugar transferases||Alpha-mannosyltransferase
AFLA_074610	15.55252184	146.3947029	-3.2346	2.42E-08	1.03E-06	-	Major facilitator superfamily domain||Major facilitator superfamily
AFLA_074650	47.63773139	1.355563129	5.1351	0.0032086	0.022167	-//-
AFLA_074800	40.33728034	9.451632928	2.0935	0.0076208	0.042698	-//-
AFLA_074970	147.9059135	345.4547286	-1.2238	0.0073363	0.041593	-	SNF2-related, N-terminal domain||P-loop containing nucleoside triphosphate hydrolase||Zinc finger, RING/FYVE/PHD-type||Helicase, C-terminal||Zinc finger, RING-type||Helicase superfamily 1/2, ATP-binding domain
AFLA_075030	6606.262023	2719.308474	1.2806	0.002229	0.016834	-	Ribosomal protein S15||Ribosomal protein S15P||Ribosomal protein S13/S15, N-terminal||S15/NS1, RNA-binding
AFLA_075080	263.3114322	95.90799295	1.457	0.0035214	0.023653	-//-
AFLA_075170	19.86643558	1.758005085	3.4983	0.0029525	0.020764	-	Alkaline phosphatase D-related||Phospholipase D, N-terminal||Metallo-dependent phosphatase-like
AFLA_075190	13706.23406	33957.03108	-1.3089	0.006201	0.036415	-//-
AFLA_075230	266.2293179	1270.570891	-2.2547	0.0001493	0.0019184	-	DHS-like NAD/FAD-binding domain||Sirtuin family||Sirtuin family, catalytic core domain||Sirtuin family, catalytic core small domain
AFLA_075410	315.5198651	122.3427655	1.3668	0.0054876	0.033315	-	Major facilitator superfamily||Major facilitator superfamily domain
AFLA_075500	248.2090102	98.40184954	1.3348	0.0046328	0.029067	-	Peptidase M20||Amidohydrolase||Peptidase M20A, amidohydrolase, predicted||Peptidase M20, dimerisation domain
AFLA_075550	0.296776205	23.18172594	-6.2875	1.21E-05	0.000233	-	Uncharacterised conserved protein UCP014753
AFLA_075560	0.808475836	43.71924921	-5.7569	1.95E-08	8.53E-07	-	Transcription factor domain, fungi||Zn(2)-C6 fungal-type DNA-binding domain
AFLA_075590	181.61828	61.49219868	1.5624	0.0026087	0.019038	-	Polyketide cyclase SnoaL-like domain||NTF2-like domain
AFLA_075620	61.41925196	6.58730855	3.2209	1.45E-05	0.00027332	-//-
AFLA_075720	265.8473139	3.565422591	6.2204	5.16E-08	2.02E-06	-	NAD(P)-binding domain||Short-chain dehydrogenase/reductase, conserved site||Short-chain dehydrogenase/reductase SDR
AFLA_075760	34.91950921	100.6665748	-1.5275	0.0065987	0.038197	-	Transcription factor domain, fungi||Zn(2)-C6 fungal-type DNA-binding domain
AFLA_075800	63.96369953	8.394726056	2.9297	3.39E-05	0.00055765	-	FAD linked oxidase, N-terminal||Berberine/berberine-like||FAD-binding, type 2||CO dehydrogenase flavoprotein-like, FAD-binding, subdomain 2
AFLA_075840	372.9591618	119.3300853	1.6441	0.00050797	0.0052671	-	Nucleotide-diphospho-sugar transferases||Glycosyltransferase 2-like||Hyaluronan synthase/nodulation protein C
AFLA_075860	692.0817797	32.68834319	4.4041	5.46E-18	1.20E-15	-	ML-like domain||TRP-like family
AFLA_075870	372.5414385	67.83713691	2.4573	5.79E-07	1.77E-05	-//-
AFLA_075930	21.06293229	0.903708753	4.5427	0.00043983	0.0046409	-	Malic acid transport protein||Voltage-dependent anion channel
AFLA_075950	5138.533724	14715.50688	-1.5179	0.00033787	0.0037542	-	Ferric reductase transmembrane component-like domain
AFLA_076020	111.5502131	17.85885003	2.643	8.43E-06	0.000173	-	Tropomyosin
AFLA_076040	578.7369291	2002.188252	-1.7906	4.45E-05	0.00070487	-	Fungal transcription factor
AFLA_076170	144.2466325	817.8602677	-2.5033	0.0014166	0.011782	-//-
AFLA_076180	38.43646395	221.8210253	-2.5288	3.44E-06	8.25E-05	-//-
AFLA_076240	65.96540802	255.1061885	-1.9513	0.0053525	0.032621	-	Pyridoxal phosphate-dependent transferase, major region, subdomain 1||Pyridoxal phosphate-dependent transferase||Pyridoxal phosphate-dependent transferase, major region, subdomain 2||Aminotransferase class-III
AFLA_076290	40.06281177	1.207325866	5.0524	1.52E-06	4.02E-05	-	Lipopolysaccharide-modifying protein
AFLA_076460	609.0035796	190.4689992	1.6769	0.00020674	0.0025151	-	AAA+ ATPase domain||P-loop containing nucleoside triphosphate hydrolase||ATPase, AAA-type, core
AFLA_076500	144.5347599	384.115169	-1.4101	0.0021248	0.016213	-//-
AFLA_076530	147.4549769	36.78158536	2.0032	0.00020422	0.0024893	-	Major facilitator superfamily domain||Major facilitator, sugar transporter-like
AFLA_076540	31.94742275	0	Inf	0.0019866	0.015354	-	Cytochrome P450, E-class, group IV||Cytochrome P450
AFLA_076610	397.2042811	157.8784939	1.3311	0.0050017	0.030913	-	Tetratricopeptide repeat||Tetratricopeptide-like helical domain||Tetratricopeptide repeat-containing domain
AFLA_076620	757.536148	222.0782189	1.7702	0.00010502	0.0014409	-	NAD(P)-binding domain||Siroheme synthase, central domain||Siroheme biosynthesis protein Met8, C-terminal||Sirohaem synthase, N-terminal
AFLA_076630	1797.741716	589.9668943	1.6075	0.00023549	0.0028051	-	Ribose-phosphate diphosphokinase||Phosphoribosyltransferase-like
AFLA_076690	1053.281429	8121.594836	-2.9469	1.49E-05	0.00027984	-//-
AFLA_076720	1418.606754	4057.960337	-1.5163	0.0081708	0.044929	-	P-loop containing nucleoside triphosphate hydrolase||ATPase, AAA-type, core||AAA+ ATPase domain
AFLA_076730	88.42636994	17.53778101	2.334	0.00011175	0.001515	-//-
AFLA_076790	12.21944682	139.8406225	-3.5165	2.86E-06	7.00E-05	-	Major facilitator, sugar transporter-like||Sugar/inositol transporter||Major facilitator superfamily domain
AFLA_076850	250.6477622	89.51267094	1.4855	0.0019131	0.014887	-	P-loop containing nucleoside triphosphate hydrolase||DNA recombination and repair protein Rad51, C-terminal
AFLA_076870	867.8104072	87.5611679	3.309	3.16E-05	0.00052719	-	Xanthine/uracil/vitamin C permease||Xanthine/uracil permease
AFLA_076970	338.629104	92.02501005	1.8796	0.00018337	0.0022793	-	Aspartyl/glutamyl-tRNA amidotransferase subunit B-related||Uncharacterised domain YOR215C, mitochondrial
AFLA_077030	460.8455966	19298.04971	-5.388	1.47E-16	2.76E-14	-	Major facilitator superfamily||Major facilitator superfamily domain
AFLA_077090	2.983281777	32.08267964	-3.4268	0.0015886	0.012822	-	Concanavalin A-like lectin/glucanase domain||Glycosyl hydrolase, five-bladed beta-propellor domain||Glycoside hydrolase, family 43
AFLA_077110	28.36339186	330.0555948	-3.5406	0.00058076	0.0058527	-//-
AFLA_077210	0.557854268	20.47349735	-5.1977	0.0062197	0.036504	-	Flavoprotein pyridine nucleotide cytochrome reductase||Oxidoreductase FAD/NAD(P)-binding
AFLA_077220	6.105762035	129.0992465	-4.4022	1.27E-08	6.04E-07	-	Riboflavin synthase-like beta-barrel||FAD-binding, type 1||Flavodoxin/nitric oxide synthase||Cytochrome P450, conserved site||Cytochrome P450, E-class, group I||NADPH-cytochrome p450 reductase, FAD-binding, alpha-helical domain-3||Cytochrome P450||Flavoprotein-like domain
AFLA_077280	53.18957607	222.1685878	-2.0624	0.00063084	0.0062178	-	Acyl-CoA dehydrogenase/oxidase C-terminal||Acyl-CoA oxidase/dehydrogenase, central domain||Acyl-CoA dehydrogenase/oxidase, N-terminal and middle domain
AFLA_077320	5.644545701	43.52176369	-2.9468	0.00017312	0.0021734	-//-
AFLA_077480	16.54308249	1.256738287	3.7185	0.0057998	0.034523	-	Bulb-type lectin domain
AFLA_077510	65.66576803	196.8668312	-1.584	0.0011273	0.0099001	-	S-adenosyl-L-methionine-dependent methyltransferase||O-methyltransferase, family 2||O-methyltransferase COMT-type||Winged helix-turn-helix DNA-binding domain
AFLA_077600	10.49972938	835.3585513	-6.314	9.07E-07	2.57E-05	-	S-adenosyl-L-methionine-dependent methyltransferase
AFLA_077800	31.40181989	157.9894612	-2.3309	0.0056148	0.033826	-	Zn(2)-C6 fungal-type DNA-binding domain||Fungal transcription factor
AFLA_077810	40.07547197	1.758005085	4.5107	2.32E-05	0.00040999	-	Intradiol ring-cleavage dioxygenase, C-terminal||Intradiol ring-cleavage dioxygenase, core
AFLA_077830	74.09019319	16.71538593	2.1481	0.00095626	0.0087145	-	FAD/NAD(P)-binding domain||Glucose-methanol-choline oxidoreductase, N-terminal||Glucose-methanol-choline oxidoreductase||Glucose-methanol-choline oxidoreductase, C-terminal
AFLA_077840	46.788837	10.25869857	2.1893	0.0028804	0.020382	-	Glycoside hydrolase, family 61||Cellulose-binding domain, fungal
AFLA_077860	886.3314852	2841.666641	-1.6808	0.00036395	0.0039807	-	Protein of unknown function DUF1688
AFLA_077870	678.5673351	2.259271882	8.2305	6.64E-16	1.19E-13	-	Major facilitator superfamily domain||Major facilitator superfamily
AFLA_077880	407.9857377	1079.208314	-1.4034	0.00155	0.012632	-	Cation/H+ exchanger
AFLA_077950	130.4649714	36.78611298	1.8264	0.0038932	0.025376	-	Wax synthase domain
AFLA_078120	75.4417424	4.320894081	4.126	3.41E-08	1.40E-06	-	Glycoside hydrolase family 16||Concanavalin A-like lectin/glucanase domain||Glycoside hydrolase, family 16, CRH1, predicted
AFLA_078130	13.91465718	0.402441955	5.1117	0.0033082	0.022574	-	Mannan endo-1,6-alpha-mannosidase||Six-hairpin glycosidase-like||Glycoside hydrolase, family 76||Six-hairpin glycosidase
AFLA_078220	49.40827069	9.992166996	2.3059	0.0018813	0.014694	-	D-isomer specific 2-hydroxyacid dehydrogenase, NAD-binding domain||NAD(P)-binding domain
AFLA_078230	493.2131804	199.4062156	1.3065	0.0046601	0.029209	-	GNAT domain||Acyl-CoA N-acyltransferase
AFLA_078270	3114.726577	8563.15594	-1.459	0.00077309	0.0073602	-	P-loop containing nucleoside triphosphate hydrolase||Class I myosin tail homology domain||SH3 domain||Myosin head, motor domain
AFLA_078640	887.7606308	211.1491995	2.0719	4.28E-06	9.90E-05	-	Tetrahydrofolate dehydrogenase/cyclohydrolase, NAD(P)-binding domain||NAD(P)-binding domain||Tetrahydrofolate dehydrogenase/cyclohydrolase||Tetrahydrofolate dehydrogenase/cyclohydrolase, catalytic domain
AFLA_078820	43.06454729	141.9260047	-1.7206	0.0010981	0.0097322	-	Pal1 cell morphology
AFLA_078850	1.616951673	4665.467914	-11.495	3.86E-05	0.00062238	-	Amino acid transporter, transmembrane domain
AFLA_079020	575.1078784	1304.65323	-1.1818	0.0058019	0.034523	-//-
AFLA_079030	23.60051746	84.48370022	-1.8399	0.0022423	0.016897	-//-
AFLA_079150	4789.866125	2039.818378	1.2315	0.0036544	0.024248	-	Aminoacyl-tRNA synthetase, class Ia, anticodon-binding||Valine-tRNA ligase||Aminoacyl-tRNA synthetase, class I, conserved site||Valyl/Leucyl/Isoleucyl-tRNA synthetase, editing domain||Methionyl/Valyl/Leucyl/Isoleucyl-tRNA synthetase, anticodon-binding||Rossmann-like alpha/beta/alpha sandwich fold||Aminoacyl-tRNA synthetase, class Ia
AFLA_079190	10.16292637	80.56982135	-2.9869	8.37E-05	0.0012036	-	AMP-binding, conserved site||AMP-dependent synthetase/ligase||Acetoacetyl-CoA synthase||Acetyl-coenzyme A synthetase, N-terminal domain
AFLA_079370	9.311889988	0	Inf	0.009165	0.048775	-//-
AFLA_079380	122.484382	7.607129882	4.0091	1.13E-09	6.84E-08	-	Phosphopantetheine attachment site||Phosphopantetheine binding ACP domain||AMP-binding, conserved site||NAD(P)-binding domain||AMP-dependent synthetase/ligase||Male sterility, NAD-binding
AFLA_079390	0.798019342	21.26387264	-4.7358	0.004399	0.027978	-	Cyanovirin-N
AFLA_079400	3512.015948	533.5756713	2.7185	9.58E-10	5.96E-08	-	Short-chain dehydrogenase/reductase SDR||Polyketide synthase, phosphopantetheine-binding domain||Thioester reductase-like domain||Male sterility, NAD-binding||AMP-binding, conserved site||NAD(P)-binding domain||Phosphopantetheine binding ACP domain||Phosphopantetheine attachment site||AMP-dependent synthetase/ligase
AFLA_079480	975.3010646	307.8843842	1.6635	0.00019526	0.002401	-	WD40/YVTN repeat-like-containing domain||Alpha/Beta hydrolase fold||Peptidase S9, prolyl oligopeptidase, catalytic domain
AFLA_079590	21.12746618	0.903708753	4.5471	0.00044965	0.0047366	-//-
AFLA_079600	141.0768713	469.6378656	-1.7351	0.00012649	0.0016715	-	Peptidase C45
AFLA_079650	785.414783	3202.162849	-2.0275	4.58E-06	0.00010385	-	PAC motif||PAS fold-4||Signal transduction response regulator, receiver domain||CheY-like superfamily||Histidine kinase domain||Signal transduction histidine kinase-related protein, C-terminal||Signal transduction histidine kinase, dimerisation/phosphoacceptor domain||Histidine kinase-like ATPase, C-terminal domain||PAS-associated, C-terminal||PAS domain
AFLA_079700	1353.823747	334.3164096	2.0178	5.89E-06	0.00012696	-	Protein arginine N-methyltransferase||S-adenosyl-L-methionine-dependent methyltransferase
AFLA_079710	1563.977521	654.8667937	1.2559	0.0037024	0.024437	-	Armadillo-like helical||Mo25-like||Conidiophore development protein HymA||Armadillo-type fold
AFLA_079830	1810.737943	9285.959568	-2.3585	1.31E-05	0.00024924	-	Proteolipid membrane potential modulator
AFLA_079880	6306.861032	2736.272542	1.2047	0.0043061	0.027517	-	Ribosomal protein L22e
AFLA_079970	337.9774181	44.84040545	2.9141	7.72E-09	3.88E-07	-//-
AFLA_080030	1565.451995	3556.138207	-1.1837	0.0052892	0.032393	-	DNA breaking-rejoining enzyme, catalytic core||DNA topoisomerase I, catalytic core, alpha-helical subdomain, eukaryotic-type||DNA topoisomerase I, catalytic core, eukaryotic-type||DNA topoisomerase I, DNA binding, eukaryotic-type||Topoisomerase I C-terminal domain||DNA topoisomerase I, domain 1||DNA topoisomerase I, catalytic core, alpha/beta subdomain||DNA topoisomerase I, active site||DNA topoi…
AFLA_080110	240.2188307	72.9011756	1.7203	0.00052805	0.0054304	-	P-loop containing nucleoside triphosphate hydrolase||Adenylate kinase, active site lid domain||Adenylate kinase, conserved site||Adenylate kinase 3/4, mitochondrial||Adenylate kinase subfamily||Adenylate kinase/UMP-CMP kinase
AFLA_080120	954.6611254	275.8322469	1.7912	5.84E-05	0.00088573	-	DNA primase, large subunit, eukaryotic||DNA primase large subunit, eukaryotic/archaeal
AFLA_080140	7766.498414	3212.43059	1.2736	0.0024148	0.017851	-	Ribosomal protein L11/L12||Ribosomal protein L11, C-terminal||Ribosomal protein L11, N-terminal
AFLA_080230	5621.431459	1793.525616	1.6481	0.00011418	0.0015346	-	Ribosomal protein L29e
AFLA_080290	965.8075732	233.9607723	2.0455	5.51E-06	0.00012065	-	Deoxyuridine triphosphate nucleotidohydrolase/Deoxycytidine triphosphate deaminase||dUTPase-like||Deoxyuridine triphosphate nucleotidohydrolase
AFLA_080310	151.2892248	358.3055432	-1.2439	0.0069205	0.039731	-//-
AFLA_080320	2695.911621	7474.678805	-1.4712	0.00066727	0.0065207	-//-
AFLA_080380	78.28295765	292.7330129	-1.9028	0.0013079	0.011106	-//-
AFLA_080440	300.3175942	67.00051593	2.1642	8.85E-06	0.00018018	-	Zinc finger, MYND-type||SET domain
AFLA_080480	345.4072095	72.34831465	2.2553	4.46E-06	0.00010175	-	HD/PDEase domain||HD domain
AFLA_080500	1.069553899	32.41417652	-4.9215	0.0021599	0.01644	-	HAD-like domain||P-type ATPase, cytoplasmic domain N||P-type ATPase, transmembrane domain||P-type ATPase||Cation-transporting P-type ATPase, N-terminal||P-type ATPase, A domain||P-type ATPase, phosphorylation site
AFLA_080530	5075.31697	11373.04631	-1.164	0.006244	0.036582	-//-
AFLA_080610	256.1876151	992.3755131	-1.9537	0.00036722	0.0040129	-	Alpha/Beta hydrolase fold||Protein of unknown function DUF2417
AFLA_080670	176.5452559	3440.004884	-4.2843	4.43E-19	1.11E-16	-	Protein of unknown function DUF3712
AFLA_080870	371.2527367	999.1237657	-1.4283	0.0034808	0.023493	-	RNA polymerase I specific transcription initiation factor RRN3
AFLA_080900	1357.601309	6586.251797	-2.2784	0.0019299	0.01499	-	Aminoacyl-tRNA synthetase, class II||Aminoacyl-tRNA synthetase, class II (D/K/N)-like||Aspartyl/Asparaginyl-tRNA synthetase, class IIb||Phosphatidylglycerol lysyltransferase, C-terminal||Aspartyl-tRNA synthetase, archaeal-type||Nucleic acid-binding, OB-fold||Aminoacyl-tRNA synthetase, class II (D/K/N)
AFLA_081140	464.2465804	1420.836897	-1.6138	0.0019691	0.015247	-//-
AFLA_081190	1972.185263	719.3412516	1.455	0.0031419	0.021803	-	Cyanovirin-N
AFLA_081250	155.294424	21.87579867	2.8276	4.00E-07	1.30E-05	-	Ribokinase-like
AFLA_081480	3257.738861	24324.70025	-2.9005	0.0026809	0.019407	-//-
AFLA_081540	135.7679937	19.20186284	2.8218	2.93E-06	7.14E-05	-	Glycosyl transferase family 54||Transmembrane protein 246
AFLA_081600	27.44888195	286.8215078	-3.3853	0.00058349	0.0058755	-//-
AFLA_081740	150.6553028	52.18553138	1.5295	0.0032443	0.022291	-	Cyclophilin-type peptidyl-prolyl cis-trans isomerase||Cyclophilin-type peptidyl-prolyl cis-trans isomerase domain||Cyclophilin-type peptidyl-prolyl cis-trans isomerase, conserved site||Cyclophilin-like domain
AFLA_081750	2631.655118	910.0350362	1.532	0.00036928	0.0040284	-	GroEL-like equatorial domain||TCP-1-like chaperonin intermediate domain||Chaperonin Cpn60/TCP-1 family||GroEL-like apical domain||T-complex protein 1, beta subunit||Chaperonin TCP-1, conserved site||Chaperone tailless complex polypeptide 1 (TCP-1)
AFLA_081820	23.75409656	0.451854376	5.7162	5.39E-05	0.00082811	-	Six-hairpin glycosidase-like||Mannan endo-1,6-alpha-mannosidase||Glycoside hydrolase, family 76||Six-hairpin glycosidase
AFLA_081900	28937.49623	8436.519989	1.7782	0.0027956	0.01999	-//-
AFLA_081910	333.3469948	43.76168321	2.9293	7.64E-09	3.87E-07	-	Metallopeptidase, catalytic domain||Putative peptidase domain, HRXXH
AFLA_081920	824.6916823	190.4949206	2.1141	2.17E-06	5.52E-05	-	Zinc/iron permease
AFLA_081980	27.34391673	1.659180243	4.0427	0.00025055	0.0029492	-	Alpha/Beta hydrolase fold
AFLA_082010	8.637219366	44.10936428	-2.3524	0.0016303	0.013066	-//-
AFLA_082090	9.431974655	0	Inf	0.008409	0.045747	-	Transcription factor domain, fungi||Zn(2)-C6 fungal-type DNA-binding domain
AFLA_082200	788.7864636	58.74622788	3.7471	0.0086081	0.046548	-	AAA+ ATPase domain||P-loop containing nucleoside triphosphate hydrolase||ATPase, AAA-type, core
AFLA_082210	73.77104337	7.891113361	3.2248	0.00036873	0.0040259	-//-
AFLA_082230	622.7714264	166.6083051	1.9022	0.003725	0.024548	-	Major facilitator superfamily domain||Major facilitator superfamily
AFLA_082400	317.3485123	75.18728298	2.0775	1.72E-05	0.0003163	-	ABC transporter-like||P-loop containing nucleoside triphosphate hydrolase||ABC transporter type 1, transmembrane domain||AAA+ ATPase domain||ABC transporter, conserved site
AFLA_082550	810.5438372	1780.005418	-1.1349	0.0081809	0.044953	-	Metallo-beta-lactamase||Zn-dependent metallo-hydrolase, RNA specificity domain||Beta-Casp domain||Pre-mRNA 3'-end-processing endonuclease polyadenylation factor C-term
AFLA_082580	65.54968625	213.4658472	-1.7033	0.00059197	0.0059283	-	Amidase||Amidase signature domain
AFLA_082720	2719.68876	806.9261631	1.7529	5.69E-05	0.00086718	-	ELO family
AFLA_082740	21.71995398	2.061622198	3.3972	0.0027776	0.01989	-	AMP-binding, conserved site||AMP-dependent synthetase/ligase
AFLA_082880	77.20295152	17.94736556	2.1049	0.00068459	0.0066589	-//-
AFLA_082980	881.3453812	350.7543572	1.3292	0.002752	0.01974	-	Dihydroorotase homodimeric type||Metal-dependent hydrolase||Dihydroorotase, conserved site
AFLA_083050	8445.564354	2848.569828	1.568	0.00021288	0.0025699	-	Ribosomal protein S25||Winged helix-turn-helix DNA-binding domain
AFLA_083060	452.5620031	181.4796009	1.3183	0.0030517	0.021306	-	Cytochrome b5-like heme/steroid binding domain
AFLA_083210	125.7641844	310.5353672	-1.304	0.0050892	0.031382	-//-
AFLA_083250	0.511699631	72.33958967	-7.1433	0.0048789	0.030308	-	Tryptophan dimethylallyltransferase||Aromatic prenyltransferase, DMATS type
AFLA_083270	894.8870541	6206.395348	-2.794	4.13E-10	2.88E-08	-	Amino acid/polyamine transporter I
AFLA_083280	76.04975844	239.7064398	-1.6563	0.0007069	0.0068335	-//-
AFLA_083300	65.71445215	234.6145806	-1.836	0.00017016	0.0021449	-	Glycoside hydrolase family 31, N-terminal domain||Glycoside hydrolase superfamily||Galactose mutarotase, N-terminal barrel||Glycoside hydrolase family 31||Glycosyl hydrolases family 31, active site||Galactose mutarotase-like domain
AFLA_083310	41.37612483	126.3576373	-1.6106	0.0026799	0.019407	-	Amidohydrolase-related||Metal-dependent hydrolase
AFLA_083420	42.26685798	122.5810297	-1.5361	0.0038527	0.025197	-	Phosphoesterase
AFLA_083430	1318.806385	3485.102189	-1.402	0.0011535	0.010073	-	Choline kinase, N-terminal||Protein kinase-like domain
AFLA_083450	94.85561896	318.5938134	-1.7479	0.00024968	0.002949	-//-
AFLA_083460	98.90019759	1085.533023	-3.4563	5.23E-07	1.64E-05	-	Fungal transcription factor||Zn(2)-C6 fungal-type DNA-binding domain
AFLA_083470	4955.417028	1482.221406	1.7412	4.69E-05	0.00073629	-	Nucleic acid-binding, OB-fold||Ribosomal protein S28e conserved site||Ribosomal protein S28e
AFLA_083520	628.1240099	268.7479738	1.2248	0.0070064	0.040113	-	SAC domain||Inositol phosphatase
AFLA_083640	1734.910079	639.3783283	1.4401	0.0010216	0.0091952	-	Isocitrate and isopropylmalate dehydrogenases family||Isopropylmalate dehydrogenase-like domain||Isopropylmalate dehydrogenase||Isocitrate/isopropylmalate dehydrogenase, conserved site
AFLA_083840	46.85410545	12.96982483	1.853	0.008191	0.044953	-//-
AFLA_083850	142.1537495	887.421928	-2.6422	0.0025244	0.018509	-	Mss4-like||Glutathione-dependent formaldehyde-activating enzyme/centromere protein V
AFLA_083860	180.3204866	1100.58644	-2.6096	1.14E-08	5.47E-07	-	Myc-type, basic helix-loop-helix (bHLH) domain
AFLA_083920	5665.346635	2635.263907	1.1042	0.0078108	0.043471	-	Adenylosuccinate synthetase||Adenylosuccinate synthase, GTP-binding site||Adenylosuccinate synthase, active site||P-loop containing nucleoside triphosphate hydrolase
AFLA_083970	52.92196564	9.715654438	2.4455	0.0010849	0.0096514	-//-
AFLA_084000	58.25135163	276.7642823	-2.2483	8.97E-05	0.0012676	-	Rudiment single hybrid motif||ATP-grasp fold, subdomain 1||Single hybrid motif||Biotin carboxylase, C-terminal||ATP-grasp fold, subdomain 2||Biotin carboxylase-like, N-terminal domain||ATP-grasp fold||Biotin/lipoyl attachment||Pre-ATP-grasp domain||Carbamoyl-phosphate synthetase large subunit-like, ATP-binding domain||Biotin carboxylation domain
AFLA_084020	573.0877907	2557.618153	-2.158	0.0052658	0.032296	-	Homeobox KN domain||Homeodomain-like||Zinc finger, C2H2||Zinc finger, C2H2-like||Homeobox domain
AFLA_084040	6.928288457	42.20383787	-2.6068	0.00074273	0.0071142	-//-
AFLA_084200	183.4079246	535.4200102	-1.5456	0.00064694	0.0063539	-//-
AFLA_084220	490.2949266	174.4022372	1.4912	0.0011605	0.010116	-	Flavin reductase like domain||FMN-binding split barrel
AFLA_084390	472.2308256	131.849403	1.8406	0.00010553	0.0014462	-	N2227-like||S-adenosyl-L-methionine-dependent methyltransferase
AFLA_084420	388.3394079	37.1940083	3.3842	3.70E-11	3.02E-09	-	Prefoldin beta-like||Prefoldin, subunit 4||Prefoldin
AFLA_084450	6039.264757	2619.227272	1.2052	0.0048764	0.030308	-	Aminotransferase class IV||P-loop containing nucleoside triphosphate hydrolase
AFLA_084460	1289.910291	16988.23776	-3.7192	0.0020087	0.015496	-	Clp ATPase, C-terminal||Clp, N-terminal||ClpA/B family||ATPase, AAA-type, core||P-loop containing nucleoside triphosphate hydrolase||AAA+ ATPase domain||ClpA/B, conserved site 1||ClpA/B, conserved site 2
AFLA_084560	83.98917771	11.27137732	2.8975	8.46E-06	0.00017338	-	Aldo/keto reductase/potassium channel subunit beta||NADP-dependent oxidoreductase domain
AFLA_084570	867.9439971	379.3456212	1.1941	0.0072341	0.041081	-//-
AFLA_084580	331.7702104	105.7396551	1.6497	0.00062225	0.0061525	-	DML1/Misato, tubulin domain||Tubulin/FtsZ, GTPase domain||Misato Segment II tubulin-like domain
AFLA_084650	2674.12989	1233.951555	1.1158	0.0086166	0.046554	-	Short-chain dehydrogenase/reductase, conserved site||NAD(P)-binding domain||Short-chain dehydrogenase/reductase SDR
AFLA_084680	68.52071661	2.111034619	5.0205	3.06E-09	1.68E-07	-	Acyl-CoA N-acyltransferase
AFLA_084690	94.81059491	19.89052928	2.253	0.00015987	0.0020335	-	Small GTPase superfamily, ARF/SAR type||Small GTPase superfamily, ARF type||P-loop containing nucleoside triphosphate hydrolase||Small GTP-binding protein domain
AFLA_084720	638.2953446	116.2502717	2.457	1.68E-07	5.90E-06	-	Zn(2)-C6 fungal-type DNA-binding domain
AFLA_084740	2068.242742	451.3244648	2.1962	0.00010818	0.0014777	-//-
AFLA_084820	849.9759167	2352.007342	-1.4684	0.007599	0.042632	-	Acyl-CoA dehydrogenase/oxidase, N-terminal and middle domain||Acyl-CoA dehydrogenase/oxidase C-terminal||Acyl-CoA dehydrogenase, conserved site||Acyl-CoA oxidase/dehydrogenase, central domain||Acyl-CoA dehydrogenase/oxidase, N-terminal
AFLA_084930	1293.312946	573.6596291	1.1728	0.0070591	0.040378	-	DNA mismatch repair protein Msh2||P-loop containing nucleoside triphosphate hydrolase||DNA mismatch repair protein MutS-like, N-terminal||DNA mismatch repair protein MutS, connector domain||DNA mismatch repair protein MutS, clamp||DNA mismatch repair protein MutS, core||DNA mismatch repair MutS||DNA mismatch repair protein MutS, C-terminal
AFLA_084950	853.1337565	3062.206525	-1.8437	2.47E-05	0.00043115	-//-
AFLA_085060	210.0324979	56.24557069	1.9008	0.00013758	0.0017788	-	Peptide chain release factor class I/class II
AFLA_085120	238.7852968	82.65615658	1.5305	0.0016731	0.013333	-	Amino acid permease, conserved site||Amino acid/polyamine transporter I
AFLA_085160	377.2892191	1789.826003	-2.2461	4.36E-07	1.41E-05	-	ABC transporter, conserved site||AAA+ ATPase domain||P-loop containing nucleoside triphosphate hydrolase||ABC transporter-like||ABC-2 type transporter
AFLA_085200	1234.502535	4245.845835	-1.7821	0.00085794	0.0080102	-	Gti1/Pac2 family
AFLA_085310	616.8301194	214.6641654	1.5228	0.00079467	0.0075144	-	DNA polymerase epsilon catalytic subunit||Ribonuclease H-like domain||DNA-directed DNA polymerase, family B, multifunctional domain||DNA polymerase epsilon, catalytic subunit A, C-terminal||DNA-directed DNA polymerase, family B||DNA-directed DNA polymerase, family B, exonuclease domain
AFLA_085390	487.5088661	196.0557305	1.3142	0.0049227	0.030489	-	Prefoldin beta-like||Prefoldin
AFLA_085400	10069.80102	2933.549724	1.7793	2.76E-05	0.00047173	-	Alkaline phosphatase-like, alpha/beta/alpha||Metalloenzyme||Alkaline-phosphatase-like, core domain||BPG-independent PGAM, N-terminal||Phosphoglycerate mutase, 2,3-bisphosphoglycerate-independent
AFLA_085420	7212.817781	761.1165774	3.2444	1.05E-12	1.11E-10	-	Serine hydroxymethyltransferase, pyridoxal phosphate binding site||Serine hydroxymethyltransferase||Pyridoxal phosphate-dependent transferase, major region, subdomain 1||Pyridoxal phosphate-dependent transferase||Pyridoxal phosphate-dependent transferase, major region, subdomain 2
AFLA_085490	17.98554207	102.1702566	-2.5061	0.0086878	0.046838	-	Flavodoxin/nitric oxide synthase||Cytochrome P450, conserved site||Cytochrome P450, E-class, group I||Bifunctional cytochrome P450/NADPH--cytochrome P450 reductase||FAD-binding, type 1||Riboflavin synthase-like beta-barrel||Flavoprotein-like domain||NADPH-cytochrome p450 reductase, FAD-binding, alpha-helical domain-3||Oxidoreductase FAD/NAD(P)-binding||Cytochrome P450||Ferredoxin reductase-type F…
AFLA_085500	54.53172487	14.11541139	1.9498	0.0049978	0.030909	-//-
AFLA_085520	198.5243227	70.16730825	1.5004	0.0076078	0.042663	-	N-acetylglucosaminyl phosphatidylinositol deacetylase-related||Putative deacetylase LmbE-like domain
AFLA_085540	37.80149009	6.530753542	2.5331	0.0015193	0.012433	-//-
AFLA_085590	159.2332326	44.87683432	1.8271	0.00065783	0.0064485	-	Glycoside hydrolase, family 43, endo-1, 5-alpha-L-arabinosidase||Glycoside hydrolase, family 43||Glycosyl hydrolase, five-bladed beta-propellor domain
AFLA_085700	556.8812579	189.4146004	1.5558	0.00072728	0.0069929	-	Rhodanese-like domain
AFLA_085880	268.6937032	1298.101727	-2.2724	0.00046979	0.004924	-//-
AFLA_085890	12.78162975	52.93614691	-2.0502	0.0024138	0.017851	-//-
AFLA_085950	25.47062018	0.402441955	5.9839	2.48E-05	0.00043218	-	Alcohol dehydrogenase, C-terminal||Alcohol dehydrogenase superfamily, zinc-type||NAD(P)-binding domain||Alcohol dehydrogenase, zinc-type, conserved site||Polyketide synthase, enoylreductase domain||GroES-like||Alcohol dehydrogenase, N-terminal
AFLA_085970	837.1788055	236.8578664	1.8215	5.30E-05	0.00081543	-	DNA primase, small subunit||DNA primase, small subunit, eukaryotic/archaeal
AFLA_086180	1236.129853	522.6581763	1.2419	0.0045921	0.028907	-	WD40/YVTN repeat-like-containing domain||WD40-repeat-containing domain
AFLA_086280	1427.474014	636.9666047	1.1642	0.0055337	0.033546	-	GRIM-19
AFLA_086300	1481.748289	4308.323795	-1.5398	0.00038702	0.0041892	-	Vacuolar import/degradation, Vid27-related||WD40/YVTN repeat-like-containing domain
AFLA_086340	129.7106517	45.42059439	1.5139	0.0034787	0.023491	-	Polyketide cyclase/dehydrase||START-like domain
AFLA_086410	4521.056415	945.0075651	2.2583	3.63E-07	1.19E-05	-	Tetrahydrofolate dehydrogenase/cyclohydrolase, NAD(P)-binding domain||Formate-tetrahydrofolate ligase, FTHFS, conserved site||Tetrahydrofolate dehydrogenase/cyclohydrolase, conserved site||P-loop containing nucleoside triphosphate hydrolase||NAD(P)-binding domain||Tetrahydrofolate dehydrogenase/cyclohydrolase||Formate-tetrahydrofolate ligase, FTHFS||Tetrahydrofolate dehydrogenase/cyclohydrolase, …
AFLA_086530	101.579911	35.97871901	1.4974	0.0070114	0.040124	-	E3 ubiquitin ligase RBR family||IBR domain
AFLA_086580	296.5867147	1106.021333	-1.8989	0.00034978	0.0038574	-	Major facilitator superfamily domain||Major facilitator superfamily
AFLA_086600	1074.826882	2813.429089	-1.3882	0.0014066	0.011722	-	Domain of unknown function DUF1708
AFLA_086620	5940.729629	1658.108235	1.8411	2.36E-05	0.00041496	-	Glucose-6-phosphate dehydrogenase, C-terminal||Glucose-6-phosphate dehydrogenase, NAD-binding||Glucose-6-phosphate dehydrogenase, active site||NAD(P)-binding domain||Glucose-6-phosphate dehydrogenase
AFLA_086630	6310.533047	2931.204944	1.1063	0.0071685	0.040818	-	Translation protein, beta-barrel domain||Ribosomal protein L35Ae, conserved site||Ribosomal protein L35A
AFLA_086650	480.5740496	62.09191636	2.9523	8.90E-10	5.62E-08	-	Protein of unknown function DUF3602
AFLA_086660	368.016221	843.1605225	-1.196	0.0062258	0.036504	-	Mitochondrial substrate/solute carrier||Mitochondrial carrier domain
AFLA_086710	6949.452699	1986.963086	1.8063	3.51E-05	0.00057602	-	Inorganic pyrophosphatase
AFLA_086760	489.2618799	98.75399897	2.3087	9.73E-07	2.73E-05	-	ATP-dependent Clp protease proteolytic subunit||Clp protease proteolytic subunit /Translocation-enhancing protein TepA||ClpP, Ser active site||ClpP/crotonase-like domain||ClpP, histidine active site
AFLA_086920	1560.555539	597.7332294	1.3845	0.0014505	0.012008	-	Ctr copper transporter
AFLA_087060	174.839489	45.08512166	1.9553	0.0059226	0.035089	-	Glucose-methanol-choline oxidoreductase, C-terminal||FAD/NAD(P)-binding domain||Glucose-methanol-choline oxidoreductase||Glucose-methanol-choline oxidoreductase, N-terminal
AFLA_087070	11.46758212	200.6505104	-4.1291	8.38E-06	0.00017238	-	Domain of unknown function DUF1338
AFLA_087100	53.31219022	12.21931419	2.1253	0.0030081	0.021048	-	Cytochrome P450
AFLA_087110	440.0500215	104.5279201	2.0738	1.05E-05	0.00020686	-	RNA polymerase II, Rpb4, core||HRDC-like||RNA polymerase II, Rpb4
AFLA_087130	399.5642295	148.1609404	1.4313	0.0021842	0.016576	-	Zinc finger, GRF-type
AFLA_087180	3342.512946	9849.266704	-1.5591	0.00028148	0.0032602	-	Glycoside-hydrolase family GH114, TIM-barrel domain||Glycoside hydrolase superfamily
AFLA_087310	495.8743869	158.2975806	1.6473	0.00031427	0.0035395	-	Domain of unknown function DUF4243
AFLA_087380	412.5348767	113.6464399	1.86	4.87E-05	0.00075967	-	Isochorismatase-like
AFLA_087420	97.10940964	34.50039321	1.493	0.0073652	0.041668	-	Pyruvate/Phosphoenolpyruvate kinase-like domain||Isocitrate lyase/phosphorylmutase, conserved site
AFLA_087780	137.5996048	726.2882624	-2.4001	2.28E-07	7.80E-06	-//-
AFLA_087810	874.3169184	267.7924494	1.707	0.00015226	0.0019526	-	CCAAT/enhancer-binding protein C/EBP||Basic-leucine zipper domain
AFLA_087830	121.9818187	606.7671755	-2.3145	6.78E-07	2.02E-05	-	Ubiquitin interacting motif||XPG N-terminal||XPG-I domain||XPG/Rad2 endonuclease, eukaryotes||5'-3' exonuclease, C-terminal domain||Helix-hairpin-helix motif, class 2||PIN domain-like||XPG/Rad2 endonuclease||XPG conserved site
AFLA_087900	12008.08938	1445.949195	3.0539	1.25E-11	1.14E-09	-	Pyruvate kinase, beta-barrel insert domain||Pyruvate kinase, alpha/beta||Pyruvate kinase, barrel||Pyruvate kinase, active site||Pyruvate kinase||Pyruvate/Phosphoenolpyruvate kinase-like domain||Pyruvate kinase-like, insert domain||Pyruvate kinase, C-terminal
AFLA_087930	135.5423497	40.21354836	1.753	0.0013968	0.011671	-//-
AFLA_087940	68.97040333	391.3977368	-2.5046	1.17E-05	0.00022648	-	Protein of unknown function DUF1769
AFLA_087950	1341.39358	593.1327699	1.1773	0.0044438	0.028162	-	Isocitrate/isopropylmalate dehydrogenase, conserved site||Isocitrate and isopropylmalate dehydrogenases family||Isopropylmalate dehydrogenase-like domain
AFLA_088000	6.259011101	30.02607757	-2.2622	0.0071759	0.040842	-	3-beta hydroxysteroid dehydrogenase/isomerase||NAD(P)-binding domain
AFLA_088010	2049.57289	918.5016381	1.158	0.005812	0.034566	-	FAD/NAD(P)-binding domain||FAD-binding domain||Kynurenine 3-monooxygenase
AFLA_088120	571.2475627	188.3775982	1.6005	0.0004055	0.0043484	-	AMP-dependent synthetase/ligase
AFLA_088330	112.6521266	513.5220834	-2.1886	0.0078516	0.043621	-	Major facilitator superfamily domain||Major facilitator superfamily
AFLA_088460	1177.633216	3823.744579	-1.6991	8.33E-05	0.0011984	-	WD40 repeat, conserved site||WD40 repeat||BOP1, N-terminal domain||WD40-repeat-containing domain||WD repeat BOP1/Erb1||WD40/YVTN repeat-like-containing domain
AFLA_088600	212.2130889	47.22571162	2.1679	3.83E-05	0.00062025	-	Essential protein Yae1, N-terminal
AFLA_088610	43.19508419	251.053454	-2.5391	5.63E-07	1.74E-05	-	Six-bladed beta-propeller, TolB-like||SMP-30/Gluconolactonase/LRE-like region
AFLA_088650	1721.342347	775.0555251	1.1512	0.0077586	0.043238	-	Endosulphine
AFLA_088680	1049.639578	415.8080502	1.3359	0.0023501	0.017486	-	G-protein beta WD-40 repeat||WD40-repeat-containing domain||WD40/YVTN repeat-like-containing domain||Probable cytosolic iron-sulfur protein assembly protein, CIAO1/Cia1||WD40 repeat
AFLA_088700	973.257675	2589.554321	-1.4118	0.0009606	0.0087477	-	Zinc finger, CHY-type||Zinc finger, RING/FYVE/PHD-type||Zinc finger, CTCHY-type||Rubredoxin-type fold||Zinc finger, RING-type
AFLA_088800	45.69803582	8.444138477	2.4361	0.0010894	0.0096707	-//-
AFLA_088820	52.74208028	603.3990946	-3.5161	7.17E-13	7.63E-11	-	Cytochrome P450, E-class, group I||Cytochrome P450
AFLA_088860	529.9088565	1286.046759	-1.2791	0.0031498	0.021843	-	Zn(2)-C6 fungal-type DNA-binding domain||Maltose/galactoside acetyltransferase||Trimeric LpxA-like||Hexapeptide repeat
AFLA_088980	681.4725541	1671.430572	-1.2944	0.0027398	0.019697	-	WD40/YVTN repeat-like-containing domain||Small-subunit processome, Utp21||WD40-repeat-containing domain||WD40 repeat||WD40 repeat, conserved site
AFLA_089090	198.351189	875.1215548	-2.1414	2.78E-06	6.85E-05	-	Histidine phosphatase superfamily, clade-2||Histidine phosphatase superfamily||ATP-grasp fold, RimK-type
AFLA_089160	7382.015628	2294.455768	1.6859	8.89E-05	0.0012595	-	Fatty acid synthase||Acyl transferase domain||Acyl transferase||Starter unit:ACP transacylase||MaoC-like domain||Acyl transferase/acyl hydrolase/lysophospholipase||Aldolase-type TIM barrel||Domain of unknown function DUF1729||Fatty acid synthase, beta subunit, fungi||Polyketide synthase, acyl transferase domain||HotDog domain
AFLA_089170	15769.77366	3634.712383	2.1172	1.01E-06	2.82E-05	-	Phosphopantetheine-protein transferase domain||Acyl transferase domain||Beta-ketoacyl synthase, C-terminal||Fatty acid synthase alpha subunit, yeast||Acyl transferase/acyl hydrolase/lysophospholipase||NAD(P)-binding domain||4'-phosphopantetheinyl transferase superfamily||Beta-ketoacyl synthase, N-terminal||Short-chain dehydrogenase/reductase SDR||Holo-[acyl carrier protein] synthase||Beta-ketoacy…
AFLA_089210	7329.425741	3493.727572	1.0689	0.0087999	0.04728	-	Pyruvate dehydrogenase E1 component subunit beta||Transketolase family||Transketolase-like, pyrimidine-binding domain||Transketolase, C-terminal domain||Transketolase C-terminal/Pyruvate-ferredoxin oxidoreductase domain II||Thiamin diphosphate-binding fold
AFLA_089400	7.292866857	88.81430623	-3.6062	0.00040876	0.0043755	-	Histidine phosphatase superfamily||Histidine phosphatase superfamily, clade-2
AFLA_089420	27.81093086	298.2073221	-3.4226	0.0057398	0.034299	-	ABC-2 type transporter||ABC transporter-like||CDR ABC transporter||P-loop containing nucleoside triphosphate hydrolase
AFLA_089430	14.2810305	80.46162657	-2.4942	8.65E-05	0.0012369	-	Transcription factor domain, fungi
AFLA_089590	1203.434714	167.0646851	2.8487	1.42E-09	8.44E-08	-	EthD domain||Dimeric alpha-beta barrel
AFLA_089620	3.177292214	70.62031179	-4.4742	6.72E-09	3.42E-07	-	Chalcone/stilbene synthase, N-terminal||Polyketide synthase, type III||Chalcone/stilbene synthase, C-terminal||Thiolase-like
AFLA_089680	53.15100988	16.37986757	1.6982	0.0084629	0.045961	-	LysM domain||Fungal transcription factor
AFLA_089700	31.17030788	2.965330951	3.3939	0.00043034	0.0045729	-	Protein of unknown function DUF3632
AFLA_089790	123.6802357	6.283691436	4.2989	0.00014255	0.0018411	-	Major facilitator superfamily domain||Major facilitator superfamily
AFLA_089830	180.7408671	49.06514892	1.8812	0.00026637	0.003114	-//-
AFLA_089970	56.95535746	12.3625906	2.2039	0.0011049	0.0097782	-	Zn(2)-C6 fungal-type DNA-binding domain
AFLA_089980	156.8810793	44.32185091	1.8236	0.00055902	0.0056878	-	Fungal transcription factor
AFLA_090010	921.6279968	123.736433	2.8969	7.43E-10	4.81E-08	-	ATP-grasp fold||Pre-ATP-grasp domain||ATP-grasp fold, subdomain 2
AFLA_090020	133.773729	0.451854376	8.2097	1.23E-09	7.42E-08	-	Major facilitator superfamily domain||Proton-dependent oligopeptide transporter family
AFLA_090090	30.89697841	668.0649474	-4.4345	3.59E-18	8.20E-16	-	Peptidase M14, carboxypeptidase A
AFLA_090100	42.05986157	9.955081456	2.0789	0.0055496	0.033546	-	Domain of unknown function DUF218||Rossmann-like alpha/beta/alpha sandwich fold
AFLA_090180	47.8904162	1.306150708	5.1963	4.78E-07	1.51E-05	-	Alpha/Beta hydrolase fold||Serine aminopeptidase, S33
AFLA_090210	977.6381114	282.6618528	1.7902	8.23E-05	0.0011892	-	Amino acid/polyamine transporter I
AFLA_090260	34.25742003	2.464064153	3.7973	0.00010571	0.0014472	-//-
AFLA_090420	18.0937011	71.72117773	-1.9869	0.0015152	0.012413	-	Short-chain dehydrogenase/reductase, conserved site||NAD(P)-binding domain||Short-chain dehydrogenase/reductase SDR
AFLA_090430	218.9451632	655.2511864	-1.5815	0.00040617	0.0043515	-	FAD/NAD(P)-binding domain||FAD dependent oxidoreductase
AFLA_090490	103.913355	1018.751413	-3.2933	3.29E-12	3.18E-10	-	Glycoside hydrolase, family 65, central catalytic||Galactose mutarotase-like domain||Glycoside hydrolase, family 65, N-terminal||Six-hairpin glycosidase||Six-hairpin glycosidase-like
AFLA_090530	74.70971755	20.1643676	1.8895	0.0023678	0.017586	-//-
AFLA_090560	1.924184373	45.62614822	-4.5675	6.59E-05	0.00097964	-//-
AFLA_090600	49.54845502	0.804883911	5.9439	0.0010367	0.0092799	-	TLDc domain
AFLA_090790	495.1073283	210.8255612	1.2317	0.0068733	0.039495	-//-
AFLA_090880	99.86592112	25.84360394	1.9502	0.00096812	0.0088098	-//-
AFLA_090940	332.3940635	106.470637	1.6424	0.00071969	0.0069412	-	Cyclophilin-type peptidyl-prolyl cis-trans isomerase||Cyclophilin-type peptidyl-prolyl cis-trans isomerase domain||Cyclophilin-type peptidyl-prolyl cis-trans isomerase, conserved site||Cyclophilin-like domain
AFLA_090970	213.3958651	88.4066207	1.2713	0.0093474	0.049544	-	Acyl-CoA N-acyltransferase
AFLA_091000	162.9800491	5964.409182	-5.1936	0.00011174	0.001515	-	Cytochrome P450, conserved site||Cytochrome P450, E-class, group I||Cytochrome P450
AFLA_091060	14099.58975	5981.812196	1.237	0.0031869	0.022042	-	Thioredoxin domain||Redoxin||Thioredoxin-like fold
AFLA_091120	156.3073752	55.69717809	1.4887	0.004321	0.027572	-	Conserved hypothetical protein CHP02453
AFLA_091130	302.7736481	72.85460158	2.0551	2.66E-05	0.0004556	-	Conserved hypothetical protein CHP02453
AFLA_091210	6.914237871	171.4493954	-4.6321	0.00012251	0.0016281	-	Major facilitator superfamily domain||Siderophore iron transporter 1/trichothecene efflux pump Tri12
AFLA_091250	6961.521264	2937.266007	1.2449	0.0025155	0.018471	-	Ribosomal protein L24e, conserved site||Ribosomal protein L24e-related
AFLA_091260	3547.915425	1082.013087	1.7133	6.68E-05	0.0009922	-	Acyl-CoA N-acyltransferase||GNAT domain
AFLA_091290	205.7424227	1449.003905	-2.8162	0.0030702	0.021399	-	Aspartate/other aminotransferase||Aminotransferase, class I/classII||Aminotransferases, class-I, pyridoxal-phosphate-binding site||Pyridoxal phosphate-dependent transferase||Pyridoxal phosphate-dependent transferase, major region, subdomain 1
AFLA_091370	24.68485651	103.712622	-2.0709	0.00043202	0.0045777	-	Pyridoxal phosphate-dependent transferase, major region, subdomain 2||Pyridoxal phosphate-dependent transferase, major region, subdomain 1||Pyridoxal phosphate-dependent transferase||Cys/Met metabolism, pyridoxal phosphate-dependent enzyme
AFLA_091380	1807.307902	630.9163757	1.5183	0.00050049	0.0052023	-	Histidine phosphatase superfamily, clade-1||Histidine phosphatase superfamily
AFLA_091500	12.42464832	61.68902753	-2.3118	0.00051464	0.0053231	-	Glycoside hydrolase, family 35||Glycoside hydrolase superfamily||Glycoside hydrolase 35, catalytic domain||Galactose-binding domain-like||Beta-galactosidase jelly roll domain||Beta-galactosidase, domain 3||Glycoside hydrolase, catalytic domain||Beta-galactosidase, domain 2
AFLA_091530	90.59218	26.14744449	1.7927	0.0018647	0.0146	-	Creatinase/Aminopeptidase P, N-terminal||Creatinase/Aminopeptidase P/Spt16, N-terminal||Peptidase M24, structural domain
AFLA_091620	645.7595079	167.5872884	1.9461	0.0090495	0.048394	-	Alpha/Beta hydrolase fold||Serine hydrolase FSH
AFLA_091690	979.2930692	7921.355587	-3.0159	1.89E-11	1.67E-09	-	Pyruvate/Phosphoenolpyruvate kinase-like domain||Isocitrate lyase||Isocitrate lyase/phosphorylmutase, conserved site
AFLA_091700	20.30314058	637.6441971	-4.973	5.05E-08	1.99E-06	-	Nucleophile aminohydrolases, N-terminal||Asparagine synthase, glutamine-hydrolyzing||Asparagine synthase||Rossmann-like alpha/beta/alpha sandwich fold||Glutamine amidotransferase type 2 domain
AFLA_091720	256.9703788	1373.443357	-2.4181	1.01E-07	3.72E-06	-//-
AFLA_091750	826.5159794	360.8532349	1.1956	0.0092156	0.04899	-	Protein of unknown function DUF1687, fungi||Thioredoxin-like fold
AFLA_091770	205.1292817	81.6856884	1.3284	0.0082158	0.045028	-	Putative transmembrane family 234
AFLA_091780	16.61341416	1.207325866	3.7825	0.0055467	0.033546	-	Thioredoxin-like fold||Glutathione S-transferase, C-terminal-like||Glutathione S-transferase, N-terminal
AFLA_091930	1781.26697	124.7787857	3.8355	7.19E-16	1.26E-13	-	Alpha/beta hydrolase fold-1||Homoserine acetyltransferase||Alpha/Beta hydrolase fold
AFLA_091950	313.7162104	117.0685268	1.4221	0.0022532	0.016923	-	Exoribonuclease, phosphorolytic domain 2||Exoribonuclease, phosphorolytic domain 1||PNPase/RNase PH domain||Ribosomal protein S5 domain 2-type fold
AFLA_091990	18916.73807	7649.557453	1.3062	0.0019933	0.015396	-	Cyclophilin-type peptidyl-prolyl cis-trans isomerase domain||Cyclophilin-type peptidyl-prolyl cis-trans isomerase||Cyclophilin-like domain||Cyclophilin-type peptidyl-prolyl cis-trans isomerase, conserved site
AFLA_092080	164.7208649	55.73934303	1.5633	0.0020015	0.01545	-	Protein of unknown function DUF952
AFLA_092120	7471.129548	2643.141954	1.4991	0.0003491	0.0038551	-	Ribosomal protein S21e||Ribosomal protein S21e, conserved site
AFLA_092130	2901.510553	1207.287803	1.265	0.0029079	0.02053	-	Phenylalanyl-tRNA synthetase||Aminoacyl-tRNA synthetase, class II||Phenylalanyl-tRNA synthetase, class IIc, alpha subunit
AFLA_092230	28.65077618	400.0639631	-3.8036	0.0082338	0.045107	-	Major facilitator superfamily domain||Major facilitator superfamily
AFLA_092240	631.9654629	3535.30769	-2.4839	3.22E-08	1.32E-06	-	Protein kinase domain||Protein kinase-like domain||Calcium/calmodulin-dependent/calcium-dependent protein kinase||Serine/threonine-protein kinase, active site
AFLA_092270	473.0778591	158.3388178	1.5791	0.00058626	0.0058893	-	Beta-lactamase/transpeptidase-like||Beta-lactamase-related||Peptidase S12, Pab87-related, C-terminal
AFLA_092460	313.7759493	714.6581448	-1.1875	0.0083593	0.045595	-	Predicted coiled-coil protein (DUF2205)
AFLA_092580	1007.94696	304.0989448	1.7288	0.00012155	0.0016198	-	P-loop containing nucleoside triphosphate hydrolase||Kinesin motor domain||Kinesin motor domain, conserved site||Kinesin-like protein
AFLA_092610	16.64731739	1.758005085	3.2433	0.0089932	0.048154	-//-
AFLA_092710	132.5186409	49.43262779	1.4227	0.0081897	0.044953	-	DNA mismatch repair, conserved site||DNA mismatch repair protein Mlh1, C-terminal||Histidine kinase-like ATPase, C-terminal domain
AFLA_092770	433.5547779	136.5487875	1.6668	0.0016563	0.013243	-	TAP42-like protein
AFLA_092840	115.9463841	25.63603254	2.1772	0.00010365	0.0014266	-	Rossmann-like alpha/beta/alpha sandwich fold||tRNA(Ile)-lysidine synthase||tRNA(Ile)-lysidine/2-thiocytidine synthase, N-terminal
AFLA_092880	1809.268764	20613.91529	-3.5101	0.0027965	0.01999	-	Protein kinase-like domain||Protein kinase domain||Serine/threonine-protein kinase, active site||Protein kinase, ATP binding site
AFLA_092970	569.6368006	180.2077313	1.6604	0.00029026	0.0033373	-	Armadillo-like helical||Tubulin-folding cofactor D||Armadillo-type fold||Tubulin-specific chaperone D, C-terminal
AFLA_093010	160.1767357	63.30202135	1.3393	0.0075637	0.042529	-	Translation initiation factor 1A (eIF-1A)||RNA-binding domain, S1, IF1 type||Nucleic acid-binding, OB-fold
AFLA_093050	411.9137427	1519.73254	-1.8834	0.00029314	0.003352	-//-
AFLA_093100	42.54884903	146.8640684	-1.7873	0.00081502	0.0076722	-//-
AFLA_093110	381.878832	898.0236829	-1.2336	0.0051641	0.031781	-//-
AFLA_093260	673.328061	297.5144427	1.1783	0.006936	0.039801	-	Non-haem dioxygenase N-terminal domain||Oxoglutarate/iron-dependent dioxygenase||Isopenicillin N synthase-like
AFLA_093370	3077.607327	1234.042138	1.3184	0.0022151	0.016769	-	Ribonucleotide reductase-related||Ferritin-like superfamily||Ribonucleotide reductase small subunit||Ribonucleotide reductase small subunit, acitve site
AFLA_093390	292.1201992	88.35492166	1.7252	0.0002924	0.0033497	-	WD40 repeat||WD40/YVTN repeat-like-containing domain||WD40-repeat-containing domain
AFLA_093590	724.1834116	1951.774156	-1.4304	0.0012318	0.010574	-	Immunoglobulin E-set||LDB19, N-terminal
AFLA_093640	1358.103677	490.8738566	1.4682	0.0010247	0.0092051	-	LSM domain||LSM domain, eukaryotic/archaea-type
AFLA_093660	351.5755997	2269.214735	-2.6903	7.79E-06	0.00016172	-//-
AFLA_093690	271.2256929	102.7124799	1.4009	0.0038396	0.025144	-	Mg2+ transporter protein, CorA-like/Zinc transport protein ZntB
AFLA_093710	616.6584953	1393.360346	-1.176	0.0074155	0.041865	-	DNA-directed DNA-polymerase, family A, mitochondria||DNA-directed DNA polymerase, family A, conserved site||DNA-directed DNA polymerase, family A, palm domain||Ribonuclease H-like domain
AFLA_093720	4.661173241	48.42595417	-3.377	1.86E-05	0.00033859	-	Intradiol ring-cleavage dioxygenase, core
AFLA_093780	12.98789585	56.52185981	-2.1216	0.0015974	0.012885	-//-
AFLA_093790	260.4490612	1777.295532	-2.7706	1.36E-09	8.10E-08	-	DhaL domain||DhaK domain||Dihydroxyacetone kinase
AFLA_093810	629.9321211	267.5771953	1.2352	0.0057581	0.03436	-	Zinc finger, GATA-type||Zinc finger, NHR/GATA-type
AFLA_093820	697.4454479	261.776767	1.4137	0.0017575	0.013935	-	Replication factor A protein 3||Nucleic acid-binding, OB-fold
AFLA_093930	391.8274567	172.6371742	1.1825	0.0065005	0.037733	-	Peptidase S24/S26A/S26B||Peptidase S26A, signal peptidase I, conserved site||Peptidase S24/S26A/S26B/S26C||Mitochondrial inner membrane protease subunit 1||Peptidase S24/S26, beta-ribbon domain||Peptidase S26A, signal peptidase I
AFLA_093990	149.3722989	2759.872781	-4.2076	1.20E-05	0.00023234	-	Sulfatase, N-terminal||Alkaline-phosphatase-like, core domain||Sulfatase, conserved site||Alkaline phosphatase-like, alpha/beta/alpha
AFLA_094000	130.3514277	455.9705496	-1.8065	0.00061915	0.0061314	-	Major facilitator, sugar transporter-like||Sugar/inositol transporter||Sugar transporter, conserved site||Major facilitator superfamily domain
AFLA_094010	916.0867103	2322.465618	-1.3421	0.0018071	0.014283	-	Basic-leucine zipper domain
AFLA_094020	243.6675958	646.8639312	-1.4085	0.0016368	0.013102	-//-
AFLA_094050	713.4272225	210.4591741	1.7612	8.67E-05	0.0012376	-	DNA polymerase alpha, subunit B||DNA polymerase alpha/epsilon, subunit B||DNA polymerase alpha, subunit B N-terminal
AFLA_094150	737.4686011	1690.168346	-1.1965	0.005561	0.033583	-//-
AFLA_094270	59.97579374	7.380029746	3.0227	0.0064101	0.037398	-//-
AFLA_094290	16.10784237	0	Inf	0.00032175	0.0036069	-	Multi antimicrobial extrusion protein
AFLA_094340	875.3987363	2681.207839	-1.6149	0.00017579	0.0022017	-	Kinesin motor domain||P-loop containing nucleoside triphosphate hydrolase||Kinesin-like protein||Kinesin motor domain, conserved site
AFLA_094360	516.2129447	223.6789451	1.2065	0.007943	0.044012	-	Mms4/EME1/EME2||ERCC4 domain||DNA repair nuclease, XPF-type/Helicase
AFLA_094450	537.7026368	30.34218574	4.1474	0.0072951	0.041389	-	Aspartic peptidase domain||Aspartic peptidase, active site||Peptidase family A1 domain||Aspartic peptidase A1 family
AFLA_094460	786.850966	3654.546846	-2.2155	0.00055472	0.0056576	-	Zn(2)-C6 fungal-type DNA-binding domain
AFLA_094520	445.9888352	180.4157495	1.3057	0.004191	0.026968	-	AAA+ ATPase domain||P-loop containing nucleoside triphosphate hydrolase||DNA helicase Pif1-like||DNA helicase
AFLA_094540	1247.995129	3386.032833	-1.44	0.00092133	0.0084514	-	P-loop containing nucleoside triphosphate hydrolase||Dynamin-type guanine nucleotide-binding (G) domain||Dynamin superfamily||Transmembrane GTPase Fzo/Fzo1||Mitofusin family
AFLA_094570	385.7806991	83.18283871	2.2134	4.44E-06	0.00010157	-//-
AFLA_094580	47.39750035	3.770214862	3.6521	1.52E-05	0.00028298	-	4'-phosphopantetheinyl transferase superfamily||Holo-[acyl carrier protein] synthase||Phosphopantetheine-protein transferase domain
AFLA_094610	90.55288777	23.4755855	1.9476	0.00088829	0.0082324	-//-
AFLA_094630	3997.173609	1477.91231	1.4354	0.00077479	0.0073708	-	Triosephosphate isomerase||Aldolase-type TIM barrel||Triosephosphate isomerase, bacterial/eukaryotic||Triosephosphate isomerase, active site
AFLA_094740	17.45432409	1.207325866	3.8537	0.0042512	0.0273	-	Alcohol dehydrogenase superfamily, zinc-type||Alcohol dehydrogenase, C-terminal||NAD(P)-binding domain||Polyketide synthase, enoylreductase domain||GroES-like||Alcohol dehydrogenase, N-terminal
AFLA_094850	1249.623743	349.5243223	1.838	4.35E-05	0.00068999	-	Glucose-methanol-choline oxidoreductase, C-terminal||FAD/NAD(P)-binding domain||Glucose-methanol-choline oxidoreductase, N-terminal||Glucose-methanol-choline oxidoreductase
AFLA_094860	75.94664986	20.248848	1.9071	0.0025163	0.018471	-	Protein kinase-like domain||Protein kinase domain||Serine/threonine-protein kinase, active site||Protein kinase, ATP binding site
AFLA_094870	44.6601857	0.903708753	5.627	9.64E-08	3.57E-06	-//-
AFLA_095030	436.9083571	127.0937917	1.7814	0.00013175	0.0017247	-	Gamma-glutamyltranspeptidase||Nucleophile aminohydrolases, N-terminal
AFLA_095350	46.99476455	1466.049315	-4.9633	0.00017667	0.0022092	-	Acetoacetate decarboxylase beta barrel domain
AFLA_095380	0.772777694	17.77447453	-4.5236	0.00090973	0.0083878	-	Major facilitator superfamily domain||Major facilitator superfamily
AFLA_095400	363.1894235	4221.748513	-3.539	1.92E-13	2.24E-11	-//-
AFLA_095410	473.2790787	9962.151905	-4.3957	3.23E-16	5.97E-14	-//-
AFLA_095570	1641.863768	3626.23218	-1.1431	0.0083394	0.045526	-	RNA recognition motif domain||Nucleotide-binding alpha-beta plait domain||Chromatin target of PRMT1 protein, C-terminal
AFLA_095870	1940.137807	4471.619184	-1.2046	0.0056495	0.033937	-//-
AFLA_095930	161.3940624	54.2971634	1.5716	0.0030787	0.021447	-	DASH complex subunit Dad1
AFLA_095960	27.94400151	311.8331096	-3.4802	2.93E-11	2.47E-09	-	Chitin synthase||Nucleotide-diphospho-sugar transferases
AFLA_095970	4900.379408	13588.89409	-1.4715	0.00067744	0.0066046	-	Heat shock protein 70, conserved site||Heat shock protein 70kD, peptide-binding domain||Heat shock protein 70 family||Heat shock protein 70kD, C-terminal domain
AFLA_095980	272.0493095	2732.153586	-3.3281	5.06E-06	0.00011286	-	Fukutin-related||LicD family
AFLA_095990	33.61125937	124.9872965	-1.8948	0.00067801	0.0066051	-	PrpF protein
AFLA_096000	7.613820104	114.9924552	-3.9168	1.08E-08	5.25E-07	-	Major facilitator, sugar transporter-like||Sugar/inositol transporter||Major facilitator superfamily domain||Sugar transporter, conserved site
AFLA_096010	1989.72452	60.55124022	5.0383	5.08E-06	0.00011317	-	Protein of unknown function DUF3759
AFLA_096020	83.50583906	253.2837106	-1.6008	0.0058932	0.034967	-//-
AFLA_096140	102.3493459	4.723336036	4.4376	3.14E-10	2.28E-08	-	Six-hairpin glycosidase-like||Six-hairpin glycosidase||Glycosyl hydrolase, family 88
AFLA_096180	353.5907563	2.209859461	7.322	3.84E-26	2.68E-23	-	Glutathione-dependent formaldehyde-activating enzyme/centromere protein V||Mss4-like
AFLA_096340	935.5844883	85.10130304	3.4586	3.58E-13	3.95E-11	-//-
AFLA_096370	81.10392851	11.93784078	2.7642	2.49E-05	0.00043329	-	Transcription factor domain, fungi||Zn(2)-C6 fungal-type DNA-binding domain
AFLA_096640	3.5559212	55.69439897	-3.9692	6.59E-07	1.97E-05	-	MmgE/PrpD
AFLA_096670	36.29056824	355.2373542	-3.2911	1.23E-10	9.33E-09	-//-
AFLA_097120	47.02213967	8.444138477	2.4773	0.00088305	0.008196	-	Fungal transcription factor
AFLA_097130	548.0692937	0.804883911	9.4114	0.0026554	0.019278	-//-
AFLA_097140	844.3122279	89.28394084	3.2413	0.0023942	0.017746	-	Protein of unknown function DUF3632
AFLA_097160	2.686505572	30.82153227	-3.5201	0.001312	0.011133	-	Glycoside hydrolase superfamily||Alpha-L-arabinofuranosidase, C-terminal||Glycoside hydrolase, catalytic domain
AFLA_097190	387.4910309	38623.30349	-6.6392	1.28E-09	7.69E-08	-//-
AFLA_097210	116.9855757	31.09090225	1.9118	0.0021947	0.016635	-//-
AFLA_097240	425.1554497	162.64389	1.3863	0.002817	0.020093	-	Peroxiredoxin-like FAM213/AAED1||Thioredoxin-like fold
AFLA_097310	15.03648929	0	Inf	0.00057106	0.0057922	-	Alginate lyase 2||Concanavalin A-like lectin/glucanase domain
AFLA_097350	5.193785861	62.29162923	-3.5842	1.07E-06	2.94E-05	-	Amino acid transporter, transmembrane domain
AFLA_097370	246.4120284	6899.849432	-4.8074	0.00019825	0.0024306	-	Chitin synthesis regulation, Congo red resistance, RCR protein
AFLA_097390	34.90259484	109.6928605	-1.6521	0.0036231	0.024154	-//-
AFLA_097450	293.7171789	741.2336427	-1.3355	0.0028966	0.020473	-	Fatty acid desaturase domain
AFLA_097460	549.4176186	1950.792064	-1.8281	0.0015197	0.012433	-//-
AFLA_097470	2949.913529	10012.43295	-1.763	7.28E-05	0.0010682	-	Cytochrome P450, E-class, group I||Cytochrome P450, conserved site||Cytochrome P450
AFLA_097630	164.2049941	927.0543824	-2.4972	6.10E-07	1.84E-05	-//-
AFLA_097640	8.505947896	102.4316632	-3.59	2.47E-08	1.05E-06	-//-
AFLA_097670	12.97996884	137.0348707	-3.4002	0.004199	0.027006	-//-
AFLA_097690	2.932798481	676.1489025	-7.8489	4.46E-06	0.00010175	-	RmlC-like jelly roll fold||Cysteine dioxygenase type I||RmlC-like cupin domain
AFLA_097700	45.26492491	598.4691187	-3.7248	0.0004799	0.005011	-	Metallo-beta-lactamase
AFLA_097710	13.3308267	59.98545499	-2.1698	0.00099934	0.0090415	-	Major facilitator superfamily domain||Major facilitator superfamily
AFLA_097740	171.7852985	49.8423765	1.7852	0.0006968	0.0067619	-	Fungal transcription factor||Zn(2)-C6 fungal-type DNA-binding domain
AFLA_097820	1589.894433	4.957907093	8.325	1.36E-40	5.71E-37	-	Alcohol dehydrogenase, zinc-type, conserved site||GroES-like||Polyketide synthase, enoylreductase domain||Alcohol dehydrogenase, N-terminal||Alcohol dehydrogenase superfamily, zinc-type||Alcohol dehydrogenase, C-terminal||NAD(P)-binding domain
AFLA_097830	796.9188768	3.819627283	7.7049	9.40E-34	1.31E-30	-	Carbohydrate kinase, FGGY-related||Carbohydrate kinase, FGGY, N-terminal||Carbohydrate kinase, FGGY, C-terminal
AFLA_097850	1764.992471	5859.480327	-1.7311	6.42E-05	0.00095881	-	Protein of unknown function DUF3433
AFLA_097890	9095.203772	600.4175018	3.9211	2.28E-17	4.70E-15	-	Glycosyl hydrolase family 32, N-terminal||Glycosyl hydrolase family 32, C-terminal||Concanavalin A-like lectin/glucanase domain||Glycoside hydrolase, family 32||Glycosyl hydrolase, five-bladed beta-propellor domain
AFLA_097920	235.5878347	78.71327413	1.5816	0.0011084	0.0097957	-	Transcription factor domain, fungi
AFLA_097930	1498.790383	27.19671628	5.7842	3.68E-09	1.97E-07	-	NAD(P)-binding domain||Alcohol dehydrogenase, C-terminal||Alcohol dehydrogenase superfamily, zinc-type||GroES-like||Polyketide synthase, enoylreductase domain||Alcohol dehydrogenase, N-terminal||Alcohol dehydrogenase, zinc-type, conserved site
AFLA_097940	1018.413295	260.4554054	1.9672	1.00E-05	0.00020039	-	Peroxiredoxin, AhpC-type||Thioredoxin domain||Thioredoxin-like fold||Peroxiredoxin, C-terminal||Alkyl hydroperoxide reductase subunit C/ Thiol specific antioxidant
AFLA_097960	1161.133018	513.679714	1.1766	0.0057075	0.034171	-	ATPase, AAA-type, conserved site||AAA+ ATPase domain||P-loop containing nucleoside triphosphate hydrolase||BCS1, N-terminal||ATPase, AAA-type, core
AFLA_098000	38.24465722	7.434462295	2.363	0.0024243	0.017903	-	Rossmann-like alpha/beta/alpha sandwich fold||Domain of unknown function DUF218
AFLA_098080	3.315756126	29.58889598	-3.1576	0.0064639	0.037591	-//-
AFLA_098200	255.2505422	73.62295172	1.7937	0.00019943	0.0024404	-//-
AFLA_098430	564.4011483	130.5222121	2.1124	5.65E-06	0.00012312	-	Ankyrin repeat-containing domain||Cdc10||Ankyrin repeat
AFLA_098580	8.781076544	41.80319004	-2.2511	0.0022543	0.016923	-	Chloramphenicol acetyltransferase-like domain
AFLA_098590	7.895076587	50.44012224	-2.6755	0.00020841	0.0025281	-	Chloramphenicol acetyltransferase-like domain
AFLA_098630	4.52270933	28.83107859	-2.6724	0.0032656	0.022413	-	Amino acid/polyamine transporter I||Amino acid permease/ SLC12A domain
AFLA_098680	19.3042484	66.75579972	-1.79	0.0044647	0.028238	-//-
AFLA_098720	470.5064452	198.6584978	1.2439	0.0064164	0.037402	-//-
AFLA_098770	105.1433547	32.84568133	1.6786	0.0030212	0.021128	-	Phospholipase/carboxylesterase/thioesterase||Alpha/Beta hydrolase fold
AFLA_098790	12.81406384	46.22072724	-1.8508	0.0063396	0.03709	-	Phosphatidylethanolamine-binding protein
AFLA_098840	35.94364304	1.256738287	4.838	5.59E-06	0.00012227	-	Amine oxidase||FAD/NAD(P)-binding domain
AFLA_098860	761.9083167	1746.316145	-1.1966	0.0064701	0.037591	-	SPX domain||EXS, C-terminal
AFLA_098910	233.2562879	7.844046837	4.8942	7.00E-15	1.05E-12	-	Major facilitator superfamily domain
AFLA_098920	216.7428417	63.25407472	1.7768	0.0004605	0.0048428	-	Protein of unknown function DUF3632
AFLA_098950	31.63911693	6.735545813	2.2318	0.0079569	0.044051	-	Nucleoside phosphorylase domain||Nucleoside phosphorylase
AFLA_099010	12547.48118	3756.42621	1.74	6.09E-05	0.00091966	-	Aldolase-type TIM barrel||Transaldolase type 1||Transaldolase, active site||Transaldolase/Fructose-6-phosphate aldolase
AFLA_099060	702.0712681	71.99044281	3.2857	1.11E-09	6.80E-08	-	GNAT domain||Acyl-CoA N-acyltransferase
AFLA_099070	57114.01232	130.6626501	8.7719	1.45E-21	4.92E-19	-//-
AFLA_099080	5902.520318	40.70963086	7.1798	5.17E-09	2.72E-07	-	Protein of unknown function DUF3328
AFLA_099090	100.4186291	0.402441955	7.963	1.56E-11	1.39E-09	-//-
AFLA_099110	71.78017887	392.2409942	-2.4501	1.59E-05	0.00029359	-	SGNH hydrolase-type esterase domain
AFLA_099150	842.529969	270.6161117	1.6385	0.00023678	0.0028178	-	Thioredoxin, conserved site||Thioredoxin||Thioredoxin domain||Thioredoxin-like fold
AFLA_099210	3154.123149	680.3945566	2.2128	4.56E-07	1.46E-05	-//-
AFLA_099220	21729.03621	2669.004279	3.0253	2.06E-11	1.80E-09	-//-
AFLA_099250	521.9497208	4584.457678	-3.1348	0.0013739	0.011534	-	Biotin/lipoyl attachment||Biotin carboxylation domain||Pre-ATP-grasp domain||Carbamoyl-phosphate synthetase large subunit-like, ATP-binding domain||ATP-grasp fold||Single hybrid motif||ATP-grasp fold, subdomain 2||Biotin carboxylase, C-terminal||Biotin carboxylase-like, N-terminal domain||ATP-grasp fold, subdomain 1||Rudiment single hybrid motif
AFLA_099270	302.6983064	1493.793288	-2.303	0.0031511	0.021843	-	Acyl-CoA dehydrogenase, conserved site||Acyl-CoA dehydrogenase/oxidase C-terminal||Acyl-CoA oxidase/dehydrogenase, central domain||Acyl-CoA dehydrogenase/oxidase, N-terminal||Acyl-CoA dehydrogenase/oxidase, N-terminal and middle domain
AFLA_099280	330.8904	4009.86719	-3.5991	0.00013094	0.0017159	-	Acetyl-coenzyme A carboxyltransferase, N-terminal||Acetyl-coenzyme A carboxyltransferase, C-terminal||ClpP/crotonase-like domain||Carboxyl transferase
AFLA_099300	321.8551163	1111.645802	-1.7882	5.77E-05	0.00087693	-	Alpha/Beta hydrolase fold||Alpha/beta hydrolase fold-1
AFLA_099470	3.208661697	200.0412247	-5.9622	3.91E-19	1.00E-16	-//-
AFLA_099580	147.5342959	587.9702055	-1.9947	1.58E-05	0.00029249	-	Protein of unknown function DUF1752, fungi
AFLA_099790	7998.965855	3447.92987	1.2141	0.0049118	0.030462	-//-
AFLA_099800	1920.427592	711.0712386	1.4334	0.0011039	0.0097768	-//-
AFLA_099900	160.440009	1760.630441	-3.456	0.0011608	0.010116	-	Marvel domain
AFLA_099960	3590.523448	599.3255472	2.5828	9.01E-09	4.46E-07	-	Fumarate lyase, conserved site||Argininosuccinate lyase||Fumarate lyase, N-terminal||Fumarase/histidase, N-terminal||Fumarate lyase family||L-Aspartase-like||Argininosuccinate lyase, C-terminal
AFLA_100010	2568.556097	1172.567738	1.1313	0.0092777	0.049258	-	Chaperonin TCP-1, conserved site||Chaperone tailless complex polypeptide 1 (TCP-1)||GroEL-like equatorial domain||T-complex protein 1, delta subunit||TCP-1-like chaperonin intermediate domain||GroEL-like apical domain||Chaperonin Cpn60/TCP-1 family
AFLA_100180	933.3321517	190.7841204	2.2904	5.58E-07	1.73E-05	-	SAICAR synthetase, conserved site||ATP-grasp fold, subdomain 2||Phosphoribosylaminoimidazole-succinocarboxamide synthase||SAICAR synthetase/ADE2, N-terminal
AFLA_100190	328.3736704	137.000505	1.2612	0.0058655	0.034836	-	HD/PDEase domain||HD domain
AFLA_100220	87.57239954	21.56934315	2.0215	0.0076934	0.042957	-//-
AFLA_100260	360.5261903	38.02354597	3.2451	4.77E-08	1.89E-06	-	Bacteriophage T5, Orf172 DNA-binding
AFLA_100300	541.6477389	212.756097	1.3482	0.001818	0.014338	-	Zn(2)-C6 fungal-type DNA-binding domain
AFLA_100570	54.59306493	242.8177097	-2.1531	3.20E-05	0.00053304	-	NACHT nucleoside triphosphatase||Ankyrin repeat-containing domain||Nucleoside phosphorylase domain||P-loop containing nucleoside triphosphate hydrolase||Ankyrin repeat
AFLA_100650	3159.06928	201.3759002	3.9715	3.14E-17	6.36E-15	-	Alpha/Beta hydrolase fold||Peptidase S10, serine carboxypeptidase||Serine carboxypeptidase, serine active site
AFLA_100670	6266.315676	1183.841988	2.4041	1.93E-08	8.50E-07	-	PUA-like domain||Adenylyl-sulfate kinase||Sulphate adenylyltransferase catalytic domain||ATP-sulfurylase PUA-like domain||Rossmann-like alpha/beta/alpha sandwich fold||P-loop containing nucleoside triphosphate hydrolase||Sulphate adenylyltransferase
AFLA_100680	860.3968214	91.22355023	3.2375	1.06E-07	3.87E-06	-	Protein of unknown function DUF2855
AFLA_100690	5894.944029	180.6100208	5.0285	1.36E-07	4.89E-06	-	Phosphoadenosine phosphosulphate reductase CysH||Phosphoadenosine phosphosulphate reductase||Rossmann-like alpha/beta/alpha sandwich fold||Phosphoadenosine phosphosulphate/adenosine 5'-phosphosulphate reductase
AFLA_100780	836.216674	80.88027808	3.37	9.79E-05	0.00137	-	Tetrapyrrole methylase, subdomain 1||Tetrapyrrole methylase, subdomain 2||Tetrapyrrole methylase||Uroporphyrin-III C-methyltransferase, fungi||Siroheme synthase, central domain||Siroheme biosynthesis protein Met8, C-terminal||Sirohaem synthase, N-terminal||Uroporphiryn-III C-methyltransferase, conserved site||NAD(P)-binding domain
AFLA_100800	752.4055292	311.6944911	1.2714	0.0034629	0.02341	-	Alpha/Beta hydrolase fold||Serine hydrolase FSH
AFLA_100810	372.782681	126.2952276	1.5615	0.0012394	0.010625	-//-
AFLA_100940	5676.688554	2413.35087	1.234	0.0030305	0.021169	-	Zinc-binding ribosomal protein||Ribosomal protein L37ae/L37e||Ribosomal protein L37e, conserved site||Ribosomal protein L37e
AFLA_100990	79.51662164	23.80892213	1.7398	0.005548	0.033546	-//-
AFLA_101030	3.029436415	54.40172431	-4.1665	0.0040711	0.026304	-//-
AFLA_101050	231.7192088	45.80110244	2.3389	8.96E-06	0.0001822	-//-
AFLA_101080	17.24952712	1.207325866	3.8367	0.0042771	0.027396	-//-
AFLA_101160	9776.992788	3360.448928	1.5407	0.00021451	0.0025871	-	Ribosomal protein S4/S9||Ribosomal protein S4/S9, eukaryotic/archaeal||Ribosomal protein S4/S9, N-terminal||Ribosomal protein S4, conserved site||RNA-binding S4 domain
AFLA_101260	45.37601796	8.295901213	2.4515	0.0011718	0.010186	-//-
AFLA_101300	341.9673041	137.3626218	1.3159	0.0067174	0.038723	-//-
AFLA_101310	3163.968573	1096.906552	1.5283	0.00046335	0.0048646	-	Major facilitator superfamily||Major facilitator superfamily domain
AFLA_101320	852.7130844	2135.851029	-1.3247	0.002686	0.019422	-	Gdt1 family
AFLA_101370	27.22710038	3.367772906	3.0152	0.0020713	0.015901	-	Caspase-like domain
AFLA_101530	85.16509147	708.8912652	-3.0572	0.0055088	0.033412	-	Sugar/inositol transporter||Major facilitator, sugar transporter-like||Sugar transporter, conserved site||Major facilitator superfamily domain
AFLA_101700	166.171805	383.9764678	-1.2083	0.0083306	0.045518	-	Thioester reductase-like domain||Amino acid adenylation domain||Polyketide synthase, phosphopantetheine-binding domain||Phosphopantetheine binding ACP domain||AMP-binding, conserved site||NAD(P)-binding domain||AMP-dependent synthetase/ligase||Male sterility, NAD-binding
AFLA_101740	372.8086252	35.90296359	3.3763	6.69E-11	5.29E-09	-	Major facilitator, sugar transporter-like||Major facilitator superfamily domain
AFLA_101750	91.65641087	23.50067249	1.9635	0.00098273	0.0089105	-	Molybdopterin synthase sulfur carrier subunit||Beta-grasp domain||Molybdopterin synthase/thiamin biosynthesis sulphur carrier, beta-grasp
AFLA_101760	332.9413717	117.8726355	1.498	0.0015623	0.012707	-	Molybdenum cofactor biosynthesis, conserved site||MoeA, N-terminal and linker domain||MoaB/Mog domain||MoeA, C-terminal, domain IV
AFLA_101770	641.8356584	6388.627887	-3.3152	4.81E-06	0.000108	-	Histidine phosphatase superfamily
AFLA_101840	2.461125652	51.99578585	-4.401	0.001749	0.013885	-//-
AFLA_101850	53.74489233	3.681371004	3.8678	2.97E-06	7.18E-05	-	S-adenosyl-L-methionine-dependent methyltransferase
AFLA_101860	87.56641217	26.72996568	1.7119	0.0060489	0.035728	-	Nucleoside phosphorylase domain||Nucleoside phosphorylase
AFLA_101930	2013.215144	4537.273056	-1.1723	0.0062002	0.036415	-	Aldehyde dehydrogenase domain||Aldehyde dehydrogenase N-terminal domain||Aldehyde dehydrogenase, C-terminal||Aldehyde/histidinol dehydrogenase
AFLA_101960	23.86192556	131.2634577	-2.4597	1.21E-05	0.000233	-	Berberine/berberine-like||CO dehydrogenase flavoprotein-like, FAD-binding, subdomain 2||FAD-binding, type 2||FAD linked oxidase, N-terminal
AFLA_102030	261.60225	63.56320446	2.0411	3.57E-05	0.00058186	-//-
AFLA_102150	907.5601585	2077.487254	-1.1948	0.00716	0.040789	-	S-adenosyl-L-methionine-dependent methyltransferase
AFLA_102170	72.07950159	18.40685502	1.9693	0.00178	0.014086	-	Ankyrin repeat||Ankyrin repeat-containing domain||F-box domain
AFLA_102210	67.71828986	22.81179627	1.5698	0.0087091	0.046925	-	Major facilitator superfamily||Major facilitator superfamily domain
AFLA_102220	251.9185232	102.8214499	1.2928	0.0077904	0.043377	-	Essential protein Yae1, N-terminal
AFLA_102340	1110.850132	198.6712918	2.4832	8.36E-08	3.12E-06	-	Glycoside hydrolase, family 13||Glycoside hydrolase, catalytic domain||Glycosyl hydrolase, family 13, catalytic domain||Maltogenic Amylase, C-terminal||Glycosyl hydrolase, all-beta||Glycoside hydrolase superfamily
AFLA_102560	6.897653542	103.5093072	-3.9075	0.00036013	0.0039457	-	Pyoverdine biosynthesis||TauD/TfdA-like domain
AFLA_102570	27.78748839	492.7287587	-4.1483	0.002342	0.017453	-	FAD-binding domain||FAD/NAD(P)-binding domain
AFLA_102710	69.266775	14.76758968	2.2297	0.00052467	0.0054046	-	Protein of unknown function DUF1275
AFLA_103130	537.7715862	1255.441565	-1.2231	0.0051916	0.031919	-	EGF-like, conserved site||EGF-like domain
AFLA_103140	0.261078063	97.30365783	-8.5419	8.57E-17	1.66E-14	-//-
AFLA_103170	359.349559	149.0291936	1.2698	0.0072235	0.041043	-	Tetratricopeptide-like helical domain||Anaphase-promoting complex subunit 5
AFLA_103260	500.965258	214.0179923	1.227	0.0070623	0.040378	-	DASH complex subunit Spc34
AFLA_103290	4027.050464	1462.81589	1.461	0.00079395	0.0075132	-	Histone H5||Winged helix-turn-helix DNA-binding domain||Linker histone H1/H5, domain H15
AFLA_103300	16.66823038	1.659180243	3.3286	0.0091356	0.048683	-//-
AFLA_103310	798.9327409	263.2867706	1.6014	0.00043631	0.0046115	-	XPG-I domain||XPG N-terminal||Flap structure-specific endonuclease||5'-3' exonuclease, C-terminal domain||XPG conserved site||XPG/Rad2 endonuclease||PIN domain-like||Helix-hairpin-helix motif, class 2
AFLA_103390	11.25159408	58.90918354	-2.3884	0.0022927	0.01715	-//-
AFLA_103510	811.6999326	1921.608676	-1.2433	0.0047672	0.029717	-	Armadillo-type fold||Armadillo-like helical||Interferon-related developmental regulator, N-terminal
AFLA_103690	31.0837964	86.77967004	-1.4812	0.0092932	0.049298	-//-
AFLA_103710	1241.371589	512.4849451	1.2764	0.0033902	0.023005	-	Casein kinase substrate, phosphoprotein PP28
AFLA_103770	8081.203094	3768.081808	1.1007	0.0075891	0.042596	-	Ribosomal protein L15, conserved site||Ribosomal protein L18e/L15P||Ribosomal protein L15
AFLA_103780	108.7530232	304.2199134	-1.4841	0.0014912	0.012264	-	Helicase-like, DEXD box c2 type||Helicase superfamily 1/2, ATP-binding domain, DinG/Rad3-type||DNA helicase (DNA repair), Rad3 type||DEAD2||ATP-dependent helicase, C-terminal
AFLA_103830	797.9508611	339.6805111	1.2321	0.0065667	0.038064	-	OTU domain
AFLA_103890	588.0403554	1276.994841	-1.1188	0.0086292	0.046602	-	Nrap protein
AFLA_104020	2008.841702	915.4237945	1.1339	0.0075444	0.042467	-	NADH dehydrogenase [ubiquinone] 1 beta subcomplex subunit 9||Complex 1 LYR protein
AFLA_104030	12531.82948	5903.450865	1.086	0.0094264	0.04992	-	Histone H2A||Histone H2A conserved site||Histone H2A/H2B/H3||Histone H2A, C-terminal domain||Histone-fold
AFLA_104220	1130.698376	480.7218113	1.2339	0.0043991	0.027978	-	Transcription factor domain, fungi||Zn(2)-C6 fungal-type DNA-binding domain
AFLA_104370	5.73072714	38.0630823	-2.7316	0.0029171	0.020568	-//-
AFLA_104640	130.7119415	44.46523221	1.5556	0.0044843	0.028347	-	Hemolysin, aegerolysin type
AFLA_104650	356.3472998	16.485835	4.434	6.43E-16	1.17E-13	-	Pyridoxamine 5'-phosphate oxidase||Pyridoxine 5'-phosphate oxidase, dimerisation, C-terminal||Pyridoxamine 5'-phosphate oxidase-like, FMN-binding domain||FMN-binding split barrel
AFLA_104670	74.45549338	5.478807526	3.7644	0.0010466	0.009361	-	Alpha/Beta hydrolase fold||Peptidase S28
AFLA_104880	0	64.82294531	#NAME?	7.64E-14	9.70E-12	-	Glycoside hydrolase, catalytic domain||Glycoside hydrolase, family 25||Glycoside hydrolase, family 25 subgroup||Glycoside hydrolase superfamily
AFLA_104900	11.14629883	476.4532574	-5.4177	1.49E-07	5.30E-06	-	Sugar/inositol transporter||Major facilitator, sugar transporter-like||Sugar transporter, conserved site||Major facilitator superfamily domain
AFLA_104920	104.6283165	1.758005085	5.8952	3.10E-13	3.45E-11	-	Alpha/Beta hydrolase fold||Cutinase/acetylxylan esterase||Cutinase, monofunctional
AFLA_104970	15.84676431	0.854296332	4.2133	0.0036998	0.024437	-//-
AFLA_105000	1.105252042	224.916077	-7.6689	1.27E-05	0.00024287	-	Mss4-like||Glutathione-dependent formaldehyde-activating enzyme/centromere protein V
AFLA_105010	65.31997341	289.1531886	-2.1462	1.03E-05	0.00020472	-	S-adenosyl-L-methionine-dependent methyltransferase
AFLA_105020	126.4533102	21.44870295	2.5596	9.94E-06	0.00019984	-//-
AFLA_105150	0.501243137	18.84158583	-5.2323	0.0002818	0.0032609	-	Carboxylesterase type B, active site||Carboxylesterase, type B||Alpha/Beta hydrolase fold
AFLA_105250	62.66590193	17.93269278	1.8051	0.0064691	0.037591	-	Oligopeptide transporter, OPT superfamily
AFLA_105260	54.93746491	6.883783076	2.9965	4.76E-05	0.00074396	-	Oligopeptide transporter, OPT superfamily
AFLA_105320	1949.259391	733.9172942	1.4092	0.00073304	0.0070376	-	Pyridoxal phosphate-dependent transferase, major region, subdomain 2||Phosphoserine aminotransferase||Pyridoxal phosphate-dependent transferase, major region, subdomain 1||Pyridoxal phosphate-dependent transferase||Aminotransferase class V domain
AFLA_105330	209.1324474	59.70937566	1.8084	0.00049757	0.0051762	-	NmrA-like domain||NAD(P)-binding domain
AFLA_105380	2600.164458	1096.405025	1.2458	0.0033088	0.022574	-	WD40 repeat||Domain of unknown function DUF1899||Coronin||WD40 repeat, conserved site||WD40/YVTN repeat-like-containing domain||WD40-repeat-containing domain||G-protein beta WD-40 repeat
AFLA_105400	505.9080838	145.0785712	1.802	8.77E-05	0.0012484	-	Kinesin-like protein||Kinesin motor domain, conserved site||Kinesin motor domain||P-loop containing nucleoside triphosphate hydrolase
AFLA_105450	21.91070036	3.014743372	2.8615	0.006442	0.037497	-	Polyketide synthase, enoylreductase domain||Beta-ketoacyl synthase, C-terminal||Malonyl-CoA ACP transacylase, ACP-binding||NAD(P)-binding domain||Phosphopantetheine attachment site||Polyketide synthase, ketoreductase domain||Polyketide synthase, acyl transferase domain||Thiolase-like||Alcohol dehydrogenase, C-terminal||Ketoacyl-synthetase, C-terminal extension||Acyl transferase domain||Phosphopan…
AFLA_105490	48.31021535	8.140521364	2.5691	0.0011804	0.010237	-	P-loop containing nucleoside triphosphate hydrolase||Phosphoribulokinase/uridine kinase
AFLA_105570	2457.665152	222.0239439	3.4685	1.24E-10	9.34E-09	-	Branched-chain amino acid aminotransferase II||Aminotransferase, class IV, conserved site||Aminotransferase class IV
AFLA_105590	292.4823715	56.63562649	2.3686	2.37E-06	6.01E-05	-	Alpha/Beta hydrolase fold||Fungal lipase-like domain
AFLA_105610	4527.725523	384.0649631	3.5594	3.12E-07	1.04E-05	-	Dihydroxy-acid/6-phosphogluconate dehydratase||Aconitase/3-isopropylmalate dehydratase, swivel||Dihydroxy-acid/6-phosphogluconate dehydratase, conserved site||Dihydroxy-acid dehydratase
AFLA_105630	1630.539251	89.016365	4.1951	0.00026279	0.0030766	-	Cytochrome P450||Cytochrome P450, conserved site||Cytochrome P450, E-class, group I
AFLA_105700	191.1266567	11.25408958	4.086	3.34E-12	3.20E-10	-	S-adenosyl-L-methionine-dependent methyltransferase
AFLA_105730	21.08637477	2.209859461	3.2543	0.0032768	0.022478	-	Alpha/beta hydrolase fold-1||Alpha/Beta hydrolase fold
AFLA_105780	8.228615542	34.9668611	-2.0873	0.006896	0.039608	-//-
AFLA_105800	42.10241785	116.6649813	-1.4704	0.0052773	0.032335	-	Ankyrin repeat||Ankyrin repeat-containing domain
AFLA_105890	153.2624893	42.63054599	1.846	0.00054293	0.0055561	-	Alpha/beta hydrolase fold-1||Alpha/Beta hydrolase fold||Six-bladed beta-propeller, TolB-like
AFLA_105920	182.2585066	14.86619109	3.6159	1.46E-08	6.85E-07	-	Glycoside hydrolase, family 28||Pectin lyase fold/virulence factor||Parallel beta-helix repeat||Pectin lyase fold
AFLA_105930	274.878186	41.77139369	2.7182	1.72E-07	6.01E-06	-	Inosine/uridine-preferring nucleoside hydrolase domain||Inosine/uridine-preferring nucleoside hydrolase
AFLA_105990	79.15017809	25.27798288	1.6467	0.006526	0.037863	-	Zn(2)-C6 fungal-type DNA-binding domain
AFLA_106000	64.55145414	15.63153867	2.046	0.0015756	0.012779	-//-
AFLA_106090	30.07085363	0.903708753	5.0564	1.46E-05	0.00027332	-	S-adenosyl-L-methionine-dependent methyltransferase||O-methyltransferase, family 2||O-methyltransferase COMT-type
AFLA_106170	16.16951673	59.6326489	-1.8828	0.0046961	0.029361	-	Major facilitator superfamily||Major facilitator superfamily domain
AFLA_106250	1052.834951	379.5766972	1.4718	0.00093635	0.0085646	-	HAD-like domain||HAD hydrolase, subfamily IA
AFLA_106350	5829.611303	1787.967896	1.7051	5.62E-05	0.00085938	-	ATP-citrate synthase, citrate-binding domain||Succinyl-CoA synthetase-like||ATP-grasp fold, subdomain 2||ATP-grasp fold, succinyl-CoA synthetase-type
AFLA_106410	45.08243558	0	Inf	2.35E-09	1.33E-07	-	Major facilitator superfamily||Major facilitator superfamily domain
AFLA_106420	124.3083344	16.55018926	2.909	1.24E-06	3.38E-05	-	TauD/TfdA-like domain
AFLA_106490	209.5239879	70.052509	1.5806	0.001469	0.012131	-	S-phase kinase-associated protein 1-like||SKP1/BTB/POZ domain||SKP1 component, POZ domain
AFLA_106650	51.47418303	12.41914561	2.0513	0.0033381	0.0227	-	Histidine phosphatase superfamily||Histidine phosphatase superfamily, clade-1
AFLA_106670	530.0449847	170.3741565	1.6374	0.00049108	0.005113	-	Armadillo-type fold||Armadillo-like helical
AFLA_106700	992.4080015	418.1466065	1.2469	0.0050171	0.030983	-	Tetratricopeptide-like helical domain||Vacuolar protein sorting protein 11, C-terminal||Tetratricopeptide repeat-containing domain||Zinc finger, RING/FYVE/PHD-type||Zinc finger, RING-type||Armadillo-type fold||Tetratricopeptide repeat||WD40/YVTN repeat-like-containing domain||Clathrin, heavy chain/VPS, 7-fold repeat||WD40-repeat-containing domain||Vacuolar protein sorting-associated protein 11
AFLA_106750	135.6173486	930.065348	-2.7778	2.23E-09	1.27E-07	-	Sugar/inositol transporter||Major facilitator, sugar transporter-like||Sugar transporter, conserved site||Major facilitator superfamily domain
AFLA_106800	1466.938983	550.0463137	1.4152	0.0012678	0.010839	-	Metal-dependent hydrolase||Guanine deaminase||Amidohydrolase-related
AFLA_106830	194.9585816	474.0350127	-1.2818	0.0085613	0.046389	-	PAS-associated, C-terminal||Signal transduction response regulator, receiver domain||PAS domain||Histidine kinase domain||CheY-like superfamily||Histidine kinase-like ATPase, C-terminal domain||Signal transduction histidine kinase, dimerisation/phosphoacceptor domain
AFLA_106860	65.5828549	9.799701606	2.7425	5.70E-05	0.00086796	-	Protein kinase-like domain||Protein kinase domain||Serine/threonine-protein kinase, active site
AFLA_106870	13.19236279	0.451854376	4.8677	0.0045395	0.028656	-	Peptidase S8/S53 domain||Proteinase propeptide inhibitor||Peptidase S53, activation domain||Sedolisin domain
AFLA_106880	2770.005644	718.0452109	1.9477	1.21E-05	0.000233	-	Aldo/keto reductase||Aldo/keto reductase/potassium channel subunit beta||NADP-dependent oxidoreductase domain
AFLA_106920	148.1052022	16.10068078	3.2014	3.67E-08	1.48E-06	-//-
AFLA_106940	350.7775549	2655.033053	-2.9201	0.00013296	0.0017387	-	Fungal transcription factor
AFLA_106960	1.366330105	19.41685954	-3.8289	0.0013447	0.011372	-//-
AFLA_106990	85.89964154	676.3573013	-2.9771	1.61E-07	5.65E-06	-	Zn(2)-C6 fungal-type DNA-binding domain||Receptor L-domain||Fungal transcription factor||Leucine-rich repeat domain, L domain-like
AFLA_107020	74.22073009	20.74498978	1.8391	0.0028503	0.020237	-	Protein of unknown function DUF899, thioredoxin-like
AFLA_107100	14.2247494	0	Inf	0.0013027	0.01107	-	TauD/TfdA-like domain
AFLA_107110	78.13297264	12.31813904	2.6651	6.13E-05	0.00092408	-	TauD/TfdA-like domain
AFLA_107200	986.7646566	372.2983443	1.4062	0.0013508	0.011408	-	F-actin-capping protein subunit alpha||F-actin capping protein, alpha subunit, conserved site
AFLA_107240	268.2412188	67.39320034	1.9929	3.72E-05	0.00060483	-	FAD/NAD(P)-binding domain||FAD dependent oxidoreductase
AFLA_107300	352.0516992	89.90540097	1.9693	4.10E-05	0.00065619	-	RmlC-like cupin domain||3-hydroxyanthranilic acid dioxygenase||RmlC-like jelly roll fold
AFLA_107320	1617.781308	543.8004491	1.5729	0.00028593	0.0033013	-//-
AFLA_107340	2280.734639	513.1899747	2.1519	7.53E-07	2.19E-05	-	Voltage-dependent anion channel
AFLA_107390	3.116352423	200.1132141	-6.0048	9.52E-14	1.18E-11	-//-
AFLA_107400	34.26175295	1631.147339	-5.5731	5.70E-15	8.73E-13	-	Ribonuclease/ribotoxin
AFLA_107490	15.59867648	1.355563129	3.5245	0.0075756	0.042558	-	Sugar/inositol transporter||Major facilitator, sugar transporter-like||Sugar transporter, conserved site||Major facilitator superfamily domain
AFLA_107500	25.86836724	0	Inf	3.62E-06	8.58E-05	-	Transcription factor domain, fungi
AFLA_107570	20.67997465	109.33399	-2.4024	0.0057354	0.03429	-//-
AFLA_107590	146.3918766	2649.870222	-4.178	0.0041246	0.026595	-	Transketolase-like, pyrimidine-binding domain||Thiamin diphosphate-binding fold||Transketolase C-terminal/Pyruvate-ferredoxin oxidoreductase domain II||Transketolase, C-terminal domain||Transketolase family
AFLA_107610	1.366330105	70.96811141	-5.6988	5.15E-05	0.00079596	-	NAD(P)-binding domain
AFLA_107650	17.39158512	0.402441955	5.4335	0.00079133	0.0074997	-//-
AFLA_107730	0	8.910770527	#NAME?	0.0040705	0.026304	-	Xaa-Pro dipeptidyl-peptidase-like domain||Galactose-binding domain-like||CocE/Serine esterase||Alpha/Beta hydrolase fold||Xaa-Pro dipeptidyl-peptidase, C-terminal
AFLA_107760	8.049060221	35.3200548	-2.1336	0.0073853	0.041751	-	Transcription factor domain, fungi
AFLA_107770	2.124322644	29.23864557	-3.7828	0.0017062	0.013563	-	Phytanoyl-CoA dioxygenase||Isopenicillin N synthase-like
AFLA_107840	406.3126602	1910.474019	-2.2333	0.001841	0.014473	-	AMP-binding enzyme C-terminal domain||AMP-dependent synthetase/ligase||AMP-binding, conserved site
AFLA_107860	4341.876118	16344.03577	-1.9124	0.0010368	0.0092799	-//-
AFLA_107880	74.37039358	2.612301417	4.8313	1.53E-05	0.00028574	-//-
AFLA_107980	16.05303041	0.903708753	4.1508	0.0033345	0.022696	-//-
AFLA_108030	53.315054	1794.670521	-5.073	1.09E-15	1.80E-13	-//-
AFLA_108050	250.6468914	55.59061327	2.1727	1.11E-05	0.000218	-	Heterokaryon incompatibility
AFLA_108250	184.595962	12.38255257	3.898	4.51E-10	3.05E-08	-	Major facilitator superfamily||Major facilitator superfamily domain
AFLA_108260	2586.369005	22.1845408	6.8652	6.66E-26	4.41E-23	-	Ammonium transporter||Ammonium transporter AmtB-like domain||Ammonium/urea transporter
AFLA_108410	4533.711963	26606.82389	-2.553	0.0014252	0.01183	-	Renal dipeptidase family||Metal-dependent hydrolase
AFLA_108610	1.88848623	186.3666308	-6.6248	3.53E-06	8.41E-05	-	Cytochrome P450||Cytochrome P450, E-class, group IV
AFLA_108650	20.84833891	0.854296332	4.6091	0.00052654	0.0054194	-	Mitochondrial carrier domain||Mitochondrial carrier protein||Mitochondrial substrate/solute carrier
AFLA_108690	259.2764308	63.91219887	2.0203	7.63E-05	0.0011093	-	Alpha/Beta hydrolase fold||Alpha/beta hydrolase fold-1
AFLA_108720	110.2805996	21.21162183	2.3783	5.74E-05	0.00087373	-	Ankyrin repeat||Ankyrin repeat-containing domain
AFLA_108730	60.45539784	3.308543668	4.1916	2.90E-07	9.72E-06	-//-
AFLA_108740	1658.731456	195.7897507	3.0827	3.08E-11	2.56E-09	-	EF-Hand 1, calcium-binding site||EF-hand domain||EF-hand domain pair
AFLA_108760	41.38878078	124.6651832	-1.5907	0.0032341	0.022258	-	Fungal transcription factor
AFLA_108770	354.6602379	2669.440216	-2.912	5.72E-06	0.00012439	-	Amino acid/polyamine transporter I
AFLA_108810	1397.386355	213.3923465	2.7112	1.60E-09	9.29E-08	-	Pyridoxamine 5'-phosphate oxidase-like, FMN-binding domain||FMN-binding split barrel
AFLA_108850	27.04820513	322.1561878	-3.5742	7.84E-12	7.30E-10	-	Alpha/beta hydrolase fold-1||Alpha/Beta hydrolase fold
AFLA_108860	3290.830858	23643.21242	-2.8449	2.84E-09	1.58E-07	-	Glycoside hydrolase, catalytic domain||Glycoside hydrolase superfamily||Glucanosyltransferase
AFLA_108930	97.87033194	28.91523065	1.759	0.0028646	0.020293	-	AMP-dependent synthetase/ligase
AFLA_108940	163.3565447	59.30001456	1.4619	0.0045935	0.028907	-	Alpha/Beta hydrolase fold||Alpha/beta hydrolase fold-3
AFLA_109080	8.816774687	68.46237482	-2.957	1.36E-05	0.00025853	-	Major facilitator superfamily domain||Sugar transporter, conserved site||Major facilitator, sugar transporter-like||Sugar/inositol transporter
AFLA_109130	143.8708758	11.07868849	3.6989	3.21E-09	1.76E-07	-//-
AFLA_109150	112.9450659	21.01915644	2.4258	2.99E-05	0.00050297	-	Zinc finger, C2H2||Zinc finger C2H2-type/integrase DNA-binding domain||Zinc finger, C2H2-like
AFLA_109190	859.2691889	309.5408903	1.473	0.00098045	0.0088963	-	Nucleic acid-binding, OB-fold||Replication factor A protein 2||Replication protein A, C-terminal||Winged helix-turn-helix DNA-binding domain
AFLA_109220	172.5343654	33.72714149	2.3549	8.94E-05	0.0012654	-	Zn(2)-C6 fungal-type DNA-binding domain
AFLA_109240	1535.055883	227.0935747	2.7569	3.21E-05	0.00053376	-	Amino acid/polyamine transporter I||Amino acid permease/ SLC12A domain||Amino acid permease, conserved site
AFLA_109320	256.2238414	1757.74168	-2.7782	0.00021196	0.0025638	-	6-phosphogluconate dehydrogenase, domain 2||6-phosphogluconate dehydrogenase C-terminal domain-like||NAD(P)-binding domain||6-phosphogluconate dehydrogenase, NADP-binding||3-hydroxyisobutyrate dehydrogenase-related, conserved site||3-hydroxyisobutyrate dehydrogenase, NAD-binding domain
AFLA_109380	6.242426771	79.37302824	-3.6685	1.04E-07	3.84E-06	-	Polyketide synthase, enoylreductase domain||Alcohol dehydrogenase, N-terminal||GroES-like||Alcohol dehydrogenase, zinc-type, conserved site||NAD(P)-binding domain||Alcohol dehydrogenase superfamily, zinc-type||Alcohol dehydrogenase, C-terminal
AFLA_109580	15.02930111	1.306150708	3.5244	0.0090483	0.048394	-//-
AFLA_109660	64.10363257	0.854296332	6.2295	2.76E-10	2.04E-08	-	Pyridoxal phosphate-dependent transferase||Pyridoxal phosphate-dependent transferase, major region, subdomain 1||Pyridoxal phosphate-dependent transferase, major region, subdomain 2||Aminotransferase class V domain
AFLA_109820	119.9302913	24.09557984	2.3154	7.55E-05	0.0011	-	Fungal transcription factor||Zn(2)-C6 fungal-type DNA-binding domain
AFLA_110000	37.55986014	238.7013166	-2.6679	0.0007009	0.0067807	-	Major facilitator superfamily||Major facilitator superfamily domain
AFLA_110050	2858.820881	32157.34272	-3.4917	1.50E-05	0.00027996	-	Cation-transporting P-type ATPase, C-terminal||P-type ATPase, transmembrane domain||P-type ATPase, cytoplasmic domain N||HAD-like domain||P-type ATPase, phosphorylation site||P-type ATPase, A domain||P-type ATPase, subfamily IID||P-type ATPase||Cation-transporting P-type ATPase, N-terminal
AFLA_110100	33.16016523	6.928175369	2.2589	0.0092989	0.049308	-	Oxidoreductase-like, N-terminal
AFLA_110120	603.2538576	23.30067691	4.6943	3.75E-07	1.22E-05	-//-
AFLA_110130	7169.84353	301.2501258	4.5729	3.47E-12	3.31E-10	-	ATPase, F0 complex, subunit C, DCCD-binding site||ATPase, F0 complex, subunit C||V-ATPase proteolipid subunit C-like domain
AFLA_110160	329.5277428	4333.540912	-3.7171	6.34E-05	0.00094969	-	Alpha/Beta hydrolase fold||Dipeptidylpeptidase IV, N-terminal domain||Peptidase S9, prolyl oligopeptidase, catalytic domain
AFLA_110210	3.423585123	46.65098969	-3.7683	0.00084903	0.0079388	-	Serine proteases, trypsin domain||Peptidase S1, PA clan||Peptidase S1A, chymotrypsin family
AFLA_110220	46.70445048	2.562888996	4.1877	2.57E-06	6.41E-05	-	Domain of unknown function DUF4243
AFLA_110240	65.3765888	14.93262218	2.1303	0.0010767	0.0096035	-	Leucine-rich repeat domain, L domain-like
AFLA_110370	629.7561194	126.8948861	2.3112	7.57E-07	2.20E-05	-	Methyltransferase type 11||S-adenosyl-L-methionine-dependent methyltransferase
AFLA_110510	2690.888312	201.9572246	3.736	2.45E-05	0.00042864	-	Ubiquitin 3 binding protein But2, C-terminal
AFLA_110570	238.3991496	69.71845644	1.7738	0.00030704	0.0034825	-	Protein of unknown function DUF3292
AFLA_110600	5571.497885	1948.41558	1.5158	0.00038602	0.004182	-	Peptidase M1, membrane alanine aminopeptidase, N-terminal||Peptidase M1, alanine aminopeptidase/leukotriene A4 hydrolase||ERAP1-like C-terminal domain
AFLA_110640	612.1521722	221.2107409	1.4685	0.0010793	0.0096198	-	Rossmann-like alpha/beta/alpha sandwich fold||Diphthine--ammonia ligase/Uncharacterised protein MJ0570||Endoribonuclease L-PSP/chorismate mutase-like||YjgF/YER057c/UK114 family||Diphthamide synthase domain
AFLA_110670	2272.973463	825.1406393	1.4619	0.0006144	0.0060941	-	Thioredoxin domain||Thioredoxin, conserved site||Galactose-binding domain-like||Thioredoxin||PITH domain||Thioredoxin-like fold
AFLA_110700	12.19134139	48.51414137	-1.9925	0.0051712	0.031809	-	Siderophore iron transporter 1/trichothecene efflux pump Tri12||Major facilitator superfamily domain
AFLA_110730	91.98382625	5.372840097	4.0976	3.78E-09	2.01E-07	-//-
AFLA_110760	14.63768189	106.5527258	-2.8638	3.52E-05	0.00057602	-	AAA+ ATPase domain||ABC transporter type 1, transmembrane domain||ABC transporter, conserved site||P-loop containing nucleoside triphosphate hydrolase||ABC transporter-like
AFLA_110770	1237.594067	537.4902844	1.2032	0.0061316	0.036092	-	Yst0336-like domain||Protein PBDC1, metazoa/fungi||Polysaccharide biosynthesis domain
AFLA_110790	612.4401464	264.1319341	1.2133	0.0056206	0.033845	-	Guanine nucleotide exchange factor, Ric8||Armadillo-type fold
AFLA_110890	124.8663334	23.26365065	2.4242	1.25E-05	0.00024108	-	FAD linked oxidase, N-terminal||FAD-binding, type 2, subdomain 1||Berberine/berberine-like||CO dehydrogenase flavoprotein-like, FAD-binding, subdomain 2||FAD-binding, type 2
AFLA_110990	3.075591052	2332.612521	-9.5669	6.93E-07	2.05E-05	-	Short-chain dehydrogenase/reductase SDR||Short-chain dehydrogenase/reductase, conserved site||NAD(P)-binding domain
AFLA_111030	232.2147201	56.95626228	2.0275	5.46E-05	0.00083825	-//-
AFLA_111080	3151.269623	1064.323828	1.566	0.00029659	0.003382	-	High mobility group protein HMGA||EVE domain||AT hook, DNA-binding motif||PUA-like domain
AFLA_111090	76.67293862	5.930661902	3.6925	2.28E-07	7.80E-06	-//-
AFLA_111100	5922.902063	794.9704485	2.8973	2.02E-10	1.50E-08	-	Thioredoxin-like fold||Peroxiredoxin, C-terminal||Alkyl hydroperoxide reductase subunit C/ Thiol specific antioxidant||Thioredoxin domain
AFLA_111120	471.0333836	184.3097121	1.3537	0.0031905	0.022055	-	Leucine-rich repeat domain, L domain-like
AFLA_111190	446.2991127	1079.776867	-1.2747	0.0035948	0.024004	-	Acyl-CoA dehydrogenase/oxidase, N-terminal||Acyl-CoA dehydrogenase/oxidase C-terminal||Acyl-CoA oxidase/dehydrogenase, central domain||Acyl-CoA dehydrogenase/oxidase, N-terminal and middle domain||Cytochrome b5-like heme/steroid binding domain
AFLA_111220	73.37589177	202.7416541	-1.4663	0.0027265	0.019635	-//-
AFLA_111240	173.2936951	1255.212229	-2.8566	1.59E-08	7.25E-07	-	Triacylglycerol lipase||Patatin/Phospholipase A2-related||Acyl transferase/acyl hydrolase/lysophospholipase
AFLA_111250	422.726247	16.24389792	4.7018	2.14E-17	4.48E-15	-//-
AFLA_111260	317.6566158	2003.477642	-2.657	0.0013409	0.011348	-	RmlC-like cupin domain||Mannose-6-phosphate isomerase||Mannose-6-phosphate isomerase, type I||RmlC-like jelly roll fold
AFLA_111290	3224.302685	693.0635676	2.2179	5.52E-07	1.72E-05	-//-
AFLA_111360	1088.619313	398.6320966	1.4494	0.00090317	0.0083439	-	DNA mismatch repair protein MutS, core||DNA mismatch repair protein MutS, C-terminal||DNA mismatch repair protein MutS, clamp||P-loop containing nucleoside triphosphate hydrolase||DNA mismatch repair protein MutS, N-terminal||DNA mismatch repair protein MutS, connector domain||DNA mismatch repair protein MutS-like, N-terminal
AFLA_111460	22.32682667	1.609767822	3.7939	0.0013621	0.011475	-	Major facilitator superfamily||Major facilitator superfamily domain
AFLA_111500	24.91995836	0.804883911	4.9524	0.00010402	0.0014287	-	DNA ligase D, 3'-phosphoesterase domain
AFLA_111530	1007.8453	321.5842177	1.648	0.00021916	0.0026406	-	GroES-like||Polyketide synthase, enoylreductase domain||Alcohol dehydrogenase, N-terminal||NAD(P)-binding domain||Alcohol dehydrogenase superfamily, zinc-type||Alcohol dehydrogenase, C-terminal
AFLA_111540	14.90488779	53.27293298	-1.8376	0.0083001	0.04542	-//-
AFLA_111710	625.1744079	16782.11481	-4.7465	6.62E-08	2.51E-06	-	TLDc domain
AFLA_111740	1109.247978	2787.745982	-1.3295	0.0022215	0.016797	-	SAC domain
AFLA_111940	378.8352407	97.11980082	1.9637	3.05E-05	0.00051243	-	DNA polymerase delta/II small subunit family||DNA polymerase alpha/epsilon, subunit B
AFLA_111950	117.9091304	34.53464036	1.7716	0.0014242	0.011829	-	Acyl-CoA N-acyltransferase||GNAT domain
AFLA_111960	1011.192936	204.249476	2.3077	5.25E-07	1.64E-05	-//-
AFLA_111980	3147.902747	1154.782741	1.4468	0.00061274	0.0060852	-	Ribosomal protein L38e
AFLA_112020	504.8302643	144.1922551	1.8078	0.00010161	0.0014079	-	Protein prenyltransferase, alpha subunit
AFLA_112090	7906.190842	2113.237039	1.9035	7.51E-06	0.00015653	-	Ribosomal protein L5, conserved site||Ribosomal protein L5||Ribosomal protein L5, C-terminal||Ribosomal protein L5 domain||Ribosomal protein L5, N-terminal
AFLA_112120	12220.94314	4573.562777	1.418	0.0007417	0.0071098	-	Aldolase-type TIM barrel||Biotin/lipoyl attachment||Carboxylase, conserved domain||Pre-ATP-grasp domain||Carbamoyl-phosphate synthetase large subunit-like, ATP-binding domain||Rudiment single hybrid motif||ATP-grasp fold, subdomain 1||Pyruvate carboxyltransferase||Pyruvate carboxylase||ATP-grasp fold, subdomain 2||Biotin carboxylase-like, N-terminal domain||Biotin carboxylase, C-terminal||ATP-gra…
AFLA_112130	4905.933757	53981.22382	-3.4599	9.48E-14	1.18E-11	-	Armadillo-type fold||Clathrin, heavy chain/VPS, 7-fold repeat||Clathrin, heavy chain, linker/propeller domain||Clathrin, heavy chain||Clathrin, heavy chain, propeller, N-terminal||Cell wall mannoprotein 1||Tetratricopeptide-like helical domain||Clathrin, heavy chain, propeller repeat
AFLA_112140	6.355649035	40.39123607	-2.6679	0.00059974	0.0059846	-//-
AFLA_112150	4629.932075	1187.663467	1.9629	4.74E-06	0.00010671	-	AICAR transformylase, insert domain||AICARFT/IMPCHase bienzyme||Methylglyoxal synthase-like domain||AICAR transformylase domain||Cytidine deaminase-like
AFLA_112300	828.1335062	2039.066278	-1.3	0.0025913	0.018944	-	Spp2/MOS2, G-patch domain||G-patch domain
AFLA_112470	15914.06412	2415.169652	2.7201	1.06E-09	6.50E-08	-	Cobalamin-independent methionine synthase||Cobalamin-independent methionine synthase MetE, C-terminal/archaeal||Cobalamin-independent methionine synthase MetE, N-terminal
AFLA_112560	391.6441838	1517.984213	-1.9545	0.004116	0.026553	-	T-complex 11
AFLA_112570	62.77798509	5.125777991	3.6144	4.11E-06	9.55E-05	-	FAD/NAD(P)-binding domain||Glucose-methanol-choline oxidoreductase, N-terminal||Glucose-methanol-choline oxidoreductase
AFLA_112620	114.7733341	19.9993351	2.5208	1.44E-05	0.00027205	-	Winged helix-turn-helix DNA-binding domain||Helicase, C-terminal||DEAD/DEAH box helicase domain||Helicase superfamily 1/2, ATP-binding domain||DNA helicase, ATP-dependent, RecQ type||ATP-dependent DNA helicase RecQ, zinc-binding domain||P-loop containing nucleoside triphosphate hydrolase
AFLA_112640	5550.530489	1817.960413	1.6103	0.00011582	0.0015533	-	Acetolactate synthase, small subunit, C-terminal||Acetolactate synthase, small subunit||ACT domain
AFLA_112660	911.8094318	334.1027418	1.4484	0.00086437	0.0080642	-	Aspartate/ornithine carbamoyltransferase||Aspartate/ornithine carbamoyltransferase, carbamoyl-P binding||Ornithine/putrescine carbamoyltransferase||Aspartate/ornithine carbamoyltransferase, Asp/Orn-binding domain
AFLA_112700	3043.080644	1078.996515	1.4958	0.00043047	0.0045729	-	Cytochrome c oxidase subunit VIIc
AFLA_112760	838.0046131	2269.072939	-1.4371	0.001004	0.0090572	-	Zinc finger C2H2-type/integrase DNA-binding domain||Zinc finger, C2H2
AFLA_112800	36.72540809	252.3361137	-2.7805	6.22E-08	2.38E-06	-	Alpha-hydroxy acid dehydrogenase, FMN-dependent||FMN-dependent dehydrogenase||Aldolase-type TIM barrel
AFLA_112810	123.2933369	329.1283678	-1.4166	0.0027491	0.019731	-	Tryptophan synthase beta subunit-like PLP-dependent enzyme||Tryptophan synthase beta chain/beta chain-like||Aldolase-type TIM barrel||Ribulose-phosphate binding barrel||Tryptophan synthase, alpha chain, active site||Tryptophan synthase, beta chain, conserved site||Tryptophan synthase, alpha chain||Tryptophan synthase, beta chain
AFLA_112820	833.8452005	273.2175403	1.6097	0.00035775	0.0039265	-	NAD(P)-binding domain||Short-chain dehydrogenase/reductase SDR
AFLA_112840	7.61921337	92.71317034	-3.6051	4.07E-08	1.64E-06	-	Polyketide synthase, thioesterase domain||Beta-ketoacyl synthase, N-terminal||Beta-ketoacyl synthase, active site||Alpha/Beta hydrolase fold||Acyl transferase domain||Starter unit:ACP transacylase||Acyl transferase||Phosphopantetheine binding ACP domain||Polyketide synthase, dehydratase domain||Acyl transferase/acyl hydrolase/lysophospholipase||Polyketide synthase, beta-ketoacyl synthase domain||…
AFLA_112860	21.52954189	2.375220296	3.1802	0.004884	0.03031	-	RmlC-like cupin domain||RmlC-like jelly roll fold
AFLA_112870	48.70689354	2.464064153	4.305	1.47E-06	3.89E-05	-	FAD-binding domain||FAD/NAD(P)-binding domain
AFLA_113090	1446.224241	239.8856643	2.5919	9.48E-09	4.67E-07	-	YCII-related||Dimeric alpha-beta barrel
AFLA_113140	2884.196261	1255.085183	1.2004	0.0038536	0.025197	-	Cytochrome b-c1 complex subunit 7
AFLA_113260	12997.65932	29535.35421	-1.1842	0.005641	0.033919	-	RlpA-like protein, double-psi beta-barrel domain
AFLA_113270	105.1372268	6071.412299	-5.8517	0.00020243	0.0024741	-	Sphingomyelin phosphodiesterase||Metallo-dependent phosphatase-like||Calcineurin-like phosphoesterase domain, apaH type
AFLA_113320	26232.54695	831.9169011	4.9788	6.92E-25	3.95E-22	-	Glutamate/phenylalanine/leucine/valine dehydrogenase||Leu/Phe/Val dehydrogenases active site||Glutamate/phenylalanine/leucine/valine dehydrogenase, dimerisation domain||Glutamate dehydrogenase||Glutamate/phenylalanine/leucine/valine dehydrogenase, C-terminal||NAD(P)-binding domain
AFLA_113330	99.89108401	2.259271882	5.4664	2.68E-12	2.63E-10	-	Short-chain dehydrogenase/reductase SDR||NAD(P)-binding domain
AFLA_113450	2067.466034	468.8326058	2.1407	1.38E-06	3.71E-05	-	Basic-leucine zipper domain
AFLA_113470	195.0843193	534.7123531	-1.4547	0.0011224	0.0098641	-	Zinc finger, SWIM-type||Zinc finger, RING/FYVE/PHD-type||Zinc finger, RING-type
AFLA_113500	114.451246	270.3870298	-1.2403	0.007698	0.042957	-	3-dehydroquinate dehydratase type I||Aldolase-type TIM barrel
AFLA_113510	32.5799331	227.5443256	-2.8041	7.30E-08	2.75E-06	-	Zn(2)-C6 fungal-type DNA-binding domain||Transcription factor domain, fungi
AFLA_113580	316.416692	1325.50993	-2.0666	3.31E-06	7.96E-05	-	Thiolase-like||Thiolase, conserved site||Thiolase, C-terminal||Thiolase, N-terminal||Thiolase, acyl-enzyme intermediate active site
AFLA_113730	317.1663402	99.24157798	1.6762	0.00048311	0.0050383	-	Cytochrome b5-like heme/steroid binding domain
AFLA_113900	56.56986608	8.022062886	2.818	0.00010187	0.001409	-//-
AFLA_113980	1826.44035	621.0024285	1.5564	0.00034487	0.0038117	-	PLC-like phosphodiesterase, TIM beta/alpha-barrel domain||Ankyrin repeat||Glycerophosphodiester phosphodiesterase domain||Ankyrin repeat-containing domain
AFLA_114030	172.7546863	437.6361713	-1.341	0.002848	0.020232	-	JmjC domain
AFLA_114200	59.91952117	656.7165115	-3.4542	0.00014525	0.0018722	-//-
AFLA_114220	58.76598954	388.2940817	-2.7241	0.00011325	0.0015254	-//-
AFLA_114440	1299.434638	289.6418255	2.1655	9.72E-07	2.73E-05	-	YjgF/YER057c/UK114 family||Endoribonuclease L-PSP/chorismate mutase-like||RidA family
AFLA_114490	236.912326	79.43449848	1.5765	0.0010553	0.0094328	-	PHP domain||Histidinol phosphate phosphatase, HisJ||Polymerase/histidinol phosphatase-like
AFLA_114700	49.29145859	5314.859249	-6.7526	6.70E-20	2.05E-17	-	Amino acid/polyamine transporter I
AFLA_114710	7.754083191	1063.390936	-7.0995	1.14E-21	3.98E-19	-//-
AFLA_114750	123.8641026	920.0553742	-2.893	1.43E-08	6.73E-07	-	Amidase||Amidase signature domain||Amidase, conserved site
AFLA_114760	1241.693028	489.6728205	1.3424	0.0022345	0.016865	-	Fungal chitin synthase||Chitin synthase||Chitin synthase N-terminal
AFLA_114770	85.83150931	27.7002697	1.6316	0.0063667	0.037197	-//-
AFLA_114900	456.5628948	166.6615409	1.4539	0.0018838	0.014698	-	Thymidylate synthase||Thymidylate synthase, active site||Thymidylate synthase/dCMP hydroxymethylase domain
AFLA_114910	462.5258515	3015.521355	-2.7048	0.00055509	0.0056576	-	Zinc finger, AN1-type
AFLA_114940	80.25582615	248.2985008	-1.6294	0.00093387	0.0085539	-//-
AFLA_115040	292.2454045	1353.192003	-2.2111	0.0057702	0.034416	-	6-phosphogluconate dehydrogenase, domain 2||3-hydroxyacyl-CoA dehydrogenase, conserved site||3-hydroxyacyl-CoA dehydrogenase, NAD binding||NAD(P)-binding domain||3-hydroxyacyl-CoA dehydrogenase||3-hydroxyacyl-CoA dehydrogenase, C-terminal||6-phosphogluconate dehydrogenase C-terminal domain-like
AFLA_115080	564.4677242	170.2963971	1.7288	0.00017166	0.0021594	-	Cyclin-D1-binding protein 1
AFLA_115320	1074.693795	4789.691298	-2.156	0.00042648	0.004542	-	Ubiquitin-protein ligase E3A, N-terminal zinc-binding domain||Ubiquitin fusion degradation protein UFD1
AFLA_115350	1330.977313	594.892936	1.1618	0.0080019	0.044221	-	Sodium/calcium exchanger membrane region||Inner membrane component domain
AFLA_115380	1362.635772	7998.699969	-2.5534	1.41E-05	0.00026622	-	PTP type protein phosphatase||Protein-tyrosine phosphatase-like||Protein-tyrosine phosphatase, active site||Rhodanese-like domain||Tyrosine specific protein phosphatases domain||Protein-tyrosine phosphatase, catalytic
AFLA_115430	735.6842584	252.3520152	1.5436	0.00070033	0.0067804	-//-
[truncated: 375 more rows]
