# Supplementary material for: Exploration of the Regulatory Mechanism of Secondary Metabolism by Comparative Transcriptomics in Aspergillus flavus
Source: Front Microbiol. 2018 Aug 7;9:1568. doi: 10.3389/fmicb.2018.01568 (PMC6090018; doi:10.3389/fmicb.2018.01568)
Supplement: TABLE S2 — Differential expression genes in ΔAfRafA vs. WT. [file Table_2.XLS]

Gene_id	��AfRafA_YES	WT_YES	log2FoldChange	pval	padj	Gene name	InterPro description
AFLA_000330	805.2814693	262.0664032	1.6196	3.34E-10	2.27E-08	-	Ankyrin repeat||Ankyrin repeat-containing domain
AFLA_000340	31.73698016	9.067088411	1.8075	0.00086902	0.011573	-	Short-chain dehydrogenase/reductase SDR||NAD(P)-binding domain
AFLA_000380	53.61676812	18.72581146	1.5177	0.00023632	0.0039777	-	Short-chain dehydrogenase/reductase SDR||NAD(P)-binding domain
AFLA_000640	87.7499467	40.71803882	1.1077	0.00094408	0.012431	-	Flavin amine oxidase||FAD/NAD(P)-binding domain||Amine oxidase
AFLA_000690	1243.257164	748.3072131	0.73242	0.0034888	0.035798	-	NAD(P)-binding domain||Alcohol dehydrogenase superfamily, zinc-type||Alcohol dehydrogenase, C-terminal||Polyketide synthase, enoylreductase domain||GroES-like||Alcohol dehydrogenase, N-terminal
AFLA_000890	122.8605057	63.31443827	0.95641	0.0026774	0.029172	-	Multicopper oxidase, copper-binding site||Multicopper oxidases, conserved site||Multicopper oxidase, type 3||Multicopper oxidase, type 2||Cupredoxin||Multicopper oxidase, type 1
AFLA_000910	24.10038885	4.746386349	2.3442	0.00015569	0.0028154	-	Tannase/feruloyl esterase||Alpha/Beta hydrolase fold
AFLA_000940	154.7741807	47.20464632	1.7132	1.74E-06	5.52E-05	-	Peptidase M20, dimerisation domain||Peptidase M20||ArgE/DapE/ACY1/CPG2/YscS, conserved site
AFLA_000990	26.0659395	0.980501367	4.7325	4.34E-07	1.56E-05	-	NAD(P)-binding domain||NmrA-like domain
AFLA_001000	330.5277865	90.77270183	1.8644	2.68E-05	0.00061836	-	Kelch-type beta propeller
AFLA_001040	19.02359533	3.598683689	2.4022	0.00053685	0.0078085	-	Aminoglycoside phosphotransferase||Protein kinase-like domain
AFLA_001070	28.84528971	6.98354668	2.0463	0.0020321	0.023197	-	AAA+ ATPase domain||ABC transporter type 1, transmembrane domain||ABC transporter, conserved site||ABC transporter-like||P-loop containing nucleoside triphosphate hydrolase
AFLA_001110	721.715572	175.7033492	2.0383	1.32E-14	1.72E-12	-//-
AFLA_001290	317.449872	672.4275816	-1.0829	2.96E-05	0.00067185	-	Proton-dependent oligopeptide transporter family
AFLA_001300	687.0097188	1336.366849	-0.95991	0.00013799	0.0025407	-	Major facilitator superfamily domain||Proton-dependent oligopeptide transporter family
AFLA_001460	3234.87901	1426.716172	1.181	1.88E-06	5.88E-05	-	Rossmann-like alpha/beta/alpha sandwich fold||Cryptochrome/DNA photolyase class 1||Cryptochrome/DNA photolyase class 1, conserved site, C-terminal||Cryptochrome/DNA photolyase, FAD-binding domain||DNA photolyase, N-terminal
AFLA_001470	982.007726	435.7780489	1.1721	3.12E-06	9.34E-05	-//-
AFLA_001670	2298.198544	1164.799184	0.98042	5.48E-05	0.0011334	-	Glyoxalase/Bleomycin resistance protein/Dihydroxybiphenyl dioxygenase||Predicted 3-demethylubiquinone-9 3-methyltransferase||PhnB-like
AFLA_001800	51.42065319	8.778599066	2.5503	2.28E-08	1.09E-06	-	P-loop containing nucleoside triphosphate hydrolase
AFLA_001810	83.14054413	42.75728534	0.95938	0.0045593	0.043663	-	FAD-binding domain||FAD/NAD(P)-binding domain||Tryptophan halogenase
AFLA_001830	2488.680019	353.8423831	2.8142	9.46E-12	8.23E-10	-	Alpha/beta hydrolase fold-1||Alpha/Beta hydrolase fold
AFLA_001840	55.63354089	16.39645756	1.7626	0.00081801	0.011067	-	Alpha/Beta hydrolase fold||Peptidase S33 tripeptidyl aminopeptidase-like, C-terminal
AFLA_001950	45.21288692	133.6270231	-1.5634	0.00012783	0.002372	-	Short-chain dehydrogenase/reductase SDR||NAD(P)-binding domain||Short-chain dehydrogenase/reductase, conserved site
AFLA_002000	1483.426153	458.6719607	1.6934	6.90E-09	3.69E-07	-	Lipopolysaccharide-modifying protein
AFLA_002010	96.55423543	21.61694332	2.1592	1.11E-05	0.00028894	-	Pectin lyase fold||Pectin lyase fold/virulence factor||EF-Hand 1, calcium-binding site
AFLA_002200	214.5111384	122.3935405	0.80953	0.0051189	0.047424	-	SGNH hydrolase-type esterase domain
AFLA_002220	81.12366035	159.0484204	-0.97127	0.0012888	0.016028	-	Amino acid permease/ SLC12A domain||Amino acid/polyamine transporter I
AFLA_002380	18.52340936	3.228742503	2.5203	0.00033069	0.005252	-	Gamma-glutamylcyclotransferase, AIG2-like
AFLA_002440	136.9854228	235.8510662	-0.78385	0.0048121	0.045505	-//-
AFLA_002820	592.2962914	79.38257027	2.8994	8.54E-07	2.90E-05	-	Protein phosphatase 2C family||PPM-type phosphatase, divalent cation binding||PPM-type phosphatase domain
AFLA_002840	80.3354626	34.00530688	1.2403	0.00049056	0.0072423	-	Haemerythrin-like||HEAT, type 2
AFLA_002860	249.5435726	40.3066714	2.6302	4.00E-17	6.83E-15	-	NAD(P)-binding domain||Oxidoreductase, N-terminal
AFLA_002890	561.4442146	243.6209253	1.2045	4.41E-06	0.00012624	-	AMP-binding, conserved site||AMP-dependent synthetase/ligase||AMP-binding enzyme C-terminal domain
AFLA_002910	666.8679986	254.9671241	1.3871	0.002735	0.029607	-	Lipocalin-like domain
AFLA_002920	37.50677592	1.909379553	4.296	3.02E-11	2.40E-09	-	Cytochrome P450, conserved site||Cytochrome P450, E-class, group I||Cytochrome P450
AFLA_002980	2653.010758	1608.805388	0.72164	0.0040719	0.039984	-	FAD/NAD(P)-binding domain||FAD dependent oxidoreductase
AFLA_003700	228.9239748	383.8821372	-0.74579	0.0045681	0.043715	-	Cytochrome b5-like heme/steroid binding domain||Cytochrome b5, heme-binding site||FMN-dependent alpha-hydroxy acid dehydrogenase, active site||Aldolase-type TIM barrel||FMN-dependent dehydrogenase||Alpha-hydroxy acid dehydrogenase, FMN-dependent
AFLA_003790	15.74771127	2.587102718	2.6057	0.0052946	0.048664	-//-
AFLA_003810	183.7710161	402.833928	-1.1323	2.33E-05	0.00054727	-	Endonuclease/exonuclease/phosphatase||Jacalin-like lectin domain
AFLA_003920	1463.034592	2505.694277	-0.77625	0.0014965	0.018239	-	Cysteine synthase/cystathionine beta-synthase, pyridoxal-phosphate attachment site||Tryptophan synthase beta subunit-like PLP-dependent enzyme
AFLA_003940	5.426946759	0	Inf	0.0037531	0.037902	-	Peptidase S9, prolyl oligopeptidase, catalytic domain||Alpha/Beta hydrolase fold
AFLA_003950	1243.138618	620.8967198	1.0016	0.0015287	0.018526	-	GNAT domain||Acyl-CoA N-acyltransferase
AFLA_004040	1382.36981	2320.117422	-0.74705	0.002102	0.023804	-	Vanillyl-alcohol oxidase, C-terminal subdomain 2||FAD-linked oxidase, C-terminal||FAD linked oxidase, N-terminal||CO dehydrogenase flavoprotein-like, FAD-binding, subdomain 2||FAD-linked oxidase-like, C-terminal||FAD-binding, type 2||FAD-binding, type 2, subdomain 1
AFLA_004100	3643.993802	1381.488987	1.3993	9.81E-09	5.06E-07	-	Beta-lactamase-related||Beta-lactamase/transpeptidase-like
AFLA_004190	560.5249378	168.446542	1.7345	3.02E-08	1.40E-06	-//-
AFLA_004270	48.23012414	18.23779027	1.403	0.00083321	0.011213	-	Protein kinase-like domain||Aminoglycoside phosphotransferase
AFLA_004500	681.94472	1274.294299	-0.90197	0.0002773	0.0045686	-	Potassium/sodium transporter Trk/HKT||Cation transporter
AFLA_004740	272.4677059	508.2805526	-0.89954	0.00059159	0.0084132	-//-
AFLA_004790	229.4302751	413.8677128	-0.85111	0.0012746	0.015901	-	Tetratricopeptide-like helical domain||Tetratricopeptide repeat-containing domain||Tetratricopeptide repeat
AFLA_004980	413.3813436	1073.751011	-1.3771	1.27E-06	4.14E-05	-//-
AFLA_005020	38.98057918	86.09032644	-1.1431	0.00079797	0.010842	-	Major facilitator superfamily||Major facilitator superfamily domain
AFLA_005110	110.9706869	46.99528462	1.2396	0.00011036	0.0020873	-//-
AFLA_005120	325.2804224	547.6413209	-0.75155	0.0032294	0.033815	-	FAD/NAD(P)-binding domain||FAD dependent oxidoreductase
AFLA_005130	266.7541123	149.8475391	0.83202	0.0039927	0.039519	-	Heterokaryon incompatibility||Aldolase-type TIM barrel||Lysine-2,3-aminomutase/glutamate 2,3-aminomutase
AFLA_005370	49.84919217	15.64711241	1.6717	0.0005662	0.0081385	-//-
AFLA_005470	11.40416726	1.605350407	2.8286	0.0022042	0.024763	-//-
AFLA_005570	250.4731795	541.6838899	-1.1128	2.22E-05	0.0005255	-	Short-chain dehydrogenase/reductase SDR||NAD(P)-binding domain
AFLA_005610	689.423025	1128.544833	-0.711	0.0042655	0.04144	-	Nucleosome assembly protein (NAP)
AFLA_006050	293.8362775	483.5773272	-0.71873	0.0050543	0.047064	-//-
AFLA_006590	16915.98605	5458.72505	1.6318	2.68E-05	0.00061836	-	Glycoside hydrolase, catalytic domain||Protein of unknown function DUF963||Glycoside hydrolase superfamily
AFLA_006620	587.5813163	1043.832713	-0.82903	0.00094814	0.012471	-	Multicopper oxidase, type 2||Multicopper oxidase, type 3||Multicopper oxidases, conserved site||Multicopper oxidase, copper-binding site||Multicopper oxidase, type 1||Cupredoxin
AFLA_006630	697.7177114	1236.487232	-0.82553	0.0009708	0.012665	-	Iron permease FTR1/Fip1/EfeU
AFLA_006640	333.9821374	547.4874803	-0.71306	0.0053836	0.049234	-//-
AFLA_006730	395.7957221	101.1095431	1.9688	2.18E-12	2.08E-10	-	Alcohol dehydrogenase superfamily, zinc-type||Alcohol dehydrogenase, zinc-type, conserved site||GroES-like||Alcohol dehydrogenase, N-terminal
AFLA_006780	583.7499109	967.0491286	-0.72824	0.0036238	0.036946	-	H/ACA ribonucleoprotein complex, subunit Nop10
AFLA_007040	2873.15689	5763.459845	-1.0043	0.0024651	0.02731	-	Cys/Met metabolism, pyridoxal phosphate-dependent enzyme||O-acetylhomoserine/O-acetylserine sulfhydrylase||Pyridoxal phosphate-dependent transferase, major region, subdomain 2||Pyridoxal phosphate-dependent transferase, major region, subdomain 1||Pyridoxal phosphate-dependent transferase
AFLA_007170	76.921729	16.32270078	2.2365	1.75E-08	8.49E-07	-	Armadillo-like helical||Pumilio RNA-binding repeat||Pumilio homology domain||Armadillo-type fold
AFLA_007200	2575.942811	1430.040924	0.84904	0.0005104	0.0074834	-	DNA repair protein XRCC4, C-terminal||DNA repair protein XRCC4
AFLA_007730	26.77729483	9.266620251	1.5309	0.0034048	0.035304	-	FAD-binding, type 2, subdomain 1||FAD-binding, type 2||CO dehydrogenase flavoprotein-like, FAD-binding, subdomain 2||FAD linked oxidase, N-terminal
AFLA_007960	22.45937113	7.14699514	1.6519	0.0045291	0.043504	-//-
AFLA_008010	20.6280364	2.351487498	3.133	1.20E-05	0.00030896	-	Six-hairpin glycosidase||Galactose-binding domain-like||Bacterial alpha-L-rhamnosidase||Six-hairpin glycosidase-like
AFLA_008180	170.6414909	52.46745388	1.7015	1.87E-06	5.83E-05	-//-
AFLA_008200	318.9527626	73.60513262	2.1155	1.07E-07	4.46E-06	-	Zinc finger, CCCH-type
AFLA_008210	454.4484273	107.4462849	2.0805	1.25E-11	1.05E-09	-//-
AFLA_008620	469.6411709	190.1842122	1.3042	9.87E-07	3.31E-05	-	Proline racemase family||Ankyrin repeat||Ankyrin repeat-containing domain
AFLA_008650	18.66613787	2.775553753	2.7496	9.65E-05	0.0018558	-	Short-chain dehydrogenase/reductase SDR||NAD(P)-binding domain
AFLA_008720	96.55896639	43.13794024	1.1625	0.00042148	0.0064074	-	Acyl transferase/acyl hydrolase/lysophospholipase||Patatin/Phospholipase A2-related
AFLA_008850	70.68208003	27.76414446	1.3481	0.0036766	0.037346	-	Major facilitator superfamily domain||Major facilitator superfamily
AFLA_009070	150.480854	43.9073122	1.777	2.77E-08	1.30E-06	-	Protein of unknown function DUF2841
AFLA_009270	635.6357774	333.9129385	0.92873	0.00024033	0.004027	-//-
AFLA_009340	34.33081832	3.870382288	3.149	6.72E-08	2.93E-06	-//-
AFLA_009380	86.18832618	189.7980251	-1.1389	0.00011515	0.0021618	-	Metallo-beta-lactamase
AFLA_009630	697.2197016	145.6334528	2.2593	4.38E-17	7.27E-15	-	Ankyrin repeat||Ankyrin repeat-containing domain
AFLA_009900	200.265276	337.7628333	-0.7541	0.0048819	0.045859	-	Mg2+ transporter protein, CorA-like/Zinc transport protein ZntB
AFLA_009910	30.15083667	65.73092594	-1.1244	0.0025803	0.028317	-	Cell fusion protein Dni1/Fig1
AFLA_010080	123.5852426	62.47217708	0.98422	0.0016107	0.019405	-	Ankyrin repeat-containing domain||Ankyrin repeat
AFLA_010090	46.96730522	5.795301643	3.0187	2.58E-09	1.49E-07	-//-
AFLA_010130	329.1761925	154.2022014	1.094	5.98E-05	0.0012261	-	Short-chain dehydrogenase/reductase SDR||NAD(P)-binding domain
AFLA_010180	829.1511146	257.1791485	1.6889	0.0006029	0.008555	-	Thioredoxin-like fold
AFLA_010200	29.7933607	4.191202181	2.8296	1.91E-06	5.93E-05	-	Ankyrin repeat||Ankyrin repeat-containing domain
AFLA_010210	20.39499136	2.959545792	2.7848	6.00E-05	0.0012267	-	Nucleoside phosphorylase domain||Nucleoside phosphorylase
AFLA_010570	80.40131168	33.86060628	1.2476	0.0012133	0.015343	-//-
AFLA_010590	317.0422613	71.98870141	2.1388	1.88E-13	2.13E-11	-	Protein of unknown function DUF1749||Alpha/Beta hydrolase fold
AFLA_010600	95.36935628	12.03271123	2.9866	3.68E-13	4.05E-11	-	Siderophore biosynthesis protein, conserved domain||Acyl-CoA N-acyltransferase
AFLA_010610	41.077939	7.20112021	2.5121	5.32E-07	1.89E-05	-	Enoyl-CoA hydratase/isomerase, conserved site||ClpP/crotonase-like domain||Crotonase superfamily
AFLA_010620	737.3733795	157.2439333	2.2294	2.09E-06	6.43E-05	-	Polyketide synthase, phosphopantetheine-binding domain||Phosphopantetheine binding ACP domain||Phosphopantetheine attachment site||Condensation domain||AMP-binding, conserved site||Amino acid adenylation domain||AMP-dependent synthetase/ligase
AFLA_010630	691.9010999	297.6326762	1.217	2.71E-06	8.18E-05	-	ABC transporter, conserved site||ABC transporter type 1, transmembrane domain||AAA+ ATPase domain||ABC transporter-like||P-loop containing nucleoside triphosphate hydrolase
AFLA_010640	1228.632583	215.4783005	2.5114	2.06E-06	6.34E-05	-	Major facilitator superfamily||Major facilitator superfamily domain
AFLA_010650	8.796836478	0.711304656	3.6284	0.0017503	0.020625	-//-
AFLA_010680	25.12163165	4.512022073	2.4771	5.36E-05	0.0011112	-	Metal-dependent hydrolase||Metal-dependent hydrolase, composite domain||Amidohydrolase-related
AFLA_010690	56.86220841	5.15115997	3.4645	3.35E-12	3.15E-10	-	Major facilitator superfamily||Major facilitator superfamily domain
AFLA_010700	340.3248569	27.68285401	3.6198	2.58E-06	7.79E-05	-	Fungal transcription factor||Zn(2)-C6 fungal-type DNA-binding domain
AFLA_010710	30.94993525	0.355652328	6.4433	6.49E-08	2.86E-06	-//-
AFLA_010720	77.09732654	1.28327957	5.9088	2.40E-23	6.96E-21	-//-
AFLA_010820	41.94177082	11.54969382	1.8605	4.76E-05	0.00099882	-	Protein kinase-like domain||Protein kinase domain
AFLA_010940	695.9327767	322.791466	1.1083	0.00045112	0.0067774	-	Cyanamide hydratase||HD domain||HD/PDEase domain
AFLA_010990	117.2077256	26.02000909	2.1714	1.01E-09	6.27E-08	-	Glucose-methanol-choline oxidoreductase, C-terminal||Glucose-methanol-choline oxidoreductase||Glucose-methanol-choline oxidoreductase, N-terminal||FAD/NAD(P)-binding domain
AFLA_011040	42.27726009	3.53277165	3.581	2.19E-10	1.55E-08	-//-
AFLA_011050	35.32644081	0.997292113	5.1466	2.39E-12	2.26E-10	-//-
AFLA_011060	24.97519552	4.224783672	2.5635	3.23E-05	0.00072037	-	Alpha/Beta hydrolase fold
AFLA_011070	35.78520816	13.3783277	1.4195	0.0017601	0.020702	-	RNA-dependent RNA polymerase, eukaryotic-type
AFLA_011110	61.15445629	9.449361345	2.6942	6.16E-08	2.74E-06	-	S-adenosyl-L-methionine-dependent methyltransferase
AFLA_011240	554.9093806	964.963812	-0.79822	0.0014174	0.017408	-	Protein of unknown function DUF4237
AFLA_011310	62.85897185	28.13997328	1.1595	0.0017418	0.020544	-	Nucleoside phosphorylase||Nucleoside phosphorylase domain||Ankyrin repeat-containing domain||P-loop containing nucleoside triphosphate hydrolase||Ankyrin repeat
AFLA_011320	28.9941696	4.216204755	2.7817	3.63E-05	0.00079984	-	P-loop containing nucleoside triphosphate hydrolase
AFLA_011360	497.5260413	167.038528	1.5746	4.16E-05	0.0008942	-//-
AFLA_011370	1674.099058	327.9964567	2.3516	3.49E-06	0.00010285	-//-
AFLA_011380	138.911879	56.78958457	1.2905	3.21E-05	0.00071738	-	Alpha/Beta hydrolase fold||Alpha/beta hydrolase fold-1
AFLA_011400	65.65654563	27.22450009	1.27	0.0036912	0.037424	-//-
AFLA_011440	41.02299076	0	Inf	1.32E-13	1.52E-11	-	Cellulose-binding domain, fungal||Glycoside hydrolase, family 61
AFLA_011650	947.0855768	487.0043272	0.95956	0.00015888	0.0028498	-//-
AFLA_011710	65.03923296	26.0108854	1.3222	0.00047566	0.0070631	-//-
AFLA_012180	233.0575023	389.419634	-0.74064	0.0051346	0.047501	-	Domain of unknown function DUF59
AFLA_012860	0.707647707	616.8559093	-9.7677	4.24E-79	1.35E-75	-	Ankyrin repeat-containing domain||Ankyrin repeat
AFLA_012870	0.335526276	331.5703924	-9.9487	7.76E-52	8.27E-49	-	Nucleoside phosphorylase||Nucleoside phosphorylase domain
AFLA_012880	0.328203544	745.9094523	-11.15	1.29E-89	5.51E-86	-	Regulator of chromosome condensation 1/beta-lactamase-inhibitor protein II||Regulator of chromosome condensation, RCC1
AFLA_012920	0	8.824512306	#NAME?	0.00012379	0.0023138	-	Transcription factor domain, fungi||Zn(2)-C6 fungal-type DNA-binding domain
AFLA_012930	0	8.501190526	#NAME?	0.00017266	0.0030468	-//-
AFLA_012950	0	113.6672428	#NAME?	9.94E-36	4.89E-33	-	Glycoside hydrolase family 3||Glycoside hydrolase superfamily||Glycoside hydrolase, family 3, N-terminal||Glycoside hydrolase, family 3, active site||Glycoside hydrolase family 3 C-terminal domain||Fibronectin type III-like domain
AFLA_012960	1.06147156	478.8322972	-8.8173	2.73E-72	5.82E-69	-	Glycoside hydrolase superfamily||Glycoside hydrolase, catalytic domain||Glycoside hydrolase, family 5
AFLA_012970	0	40.4758298	#NAME?	8.10E-17	1.33E-14	-	Zn(2)-C6 fungal-type DNA-binding domain||Transcription factor domain, fungi
AFLA_013030	0.335526276	10.93092181	-5.0258	0.0023406	0.026158	-//-
AFLA_013040	0	71.94849811	#NAME?	5.59E-22	1.49E-19	-	Peroxisomal biogenesis factor 11
AFLA_013050	0	14.69072976	#NAME?	3.67E-07	1.35E-05	-//-
AFLA_013060	0	51.15986619	#NAME?	2.12E-09	1.25E-07	-	Ion channel regulatory protein, UNC-93||Major facilitator superfamily domain
AFLA_013070	0	139.8714053	#NAME?	8.34E-41	5.61E-38	-	Major facilitator superfamily domain||Sugar transporter, conserved site||Major facilitator, sugar transporter-like||Sugar/inositol transporter
AFLA_013130	0	36.59811954	#NAME?	1.96E-15	2.72E-13	-	Zn(2)-C6 fungal-type DNA-binding domain
AFLA_013150	0	54.1437201	#NAME?	2.43E-09	1.42E-07	-	Fungal transcription factor
AFLA_013160	0	22.4257844	#NAME?	2.23E-10	1.58E-08	-	S-adenosyl-L-methionine-dependent methyltransferase
AFLA_013170	0	29.27571128	#NAME?	7.06E-13	7.46E-11	-//-
AFLA_013180	0.335526276	312.2971341	-9.8623	3.10E-07	1.17E-05	-	S-adenosyl-L-methionine-dependent methyltransferase
AFLA_013190	0	21.70715177	#NAME?	4.34E-08	1.96E-06	-//-
AFLA_013200	0.335526276	29.71461117	-6.4686	6.19E-12	5.53E-10	-	Zn(2)-C6 fungal-type DNA-binding domain
AFLA_013220	0.328203544	377.5696334	-10.168	1.50E-08	7.39E-07	-	Beta-lactamase/transpeptidase-like||Beta-lactamase-related
AFLA_013230	0.66372982	1608.263972	-11.243	7.49E-16	1.10E-13	-	Flavin monooxygenase-like||FAD/NAD(P)-binding domain
AFLA_013260	0	9.008504345	#NAME?	9.39E-05	0.0018115	-	Glycoside hydrolase superfamily||Beta-glucuronidase, C-terminal
AFLA_013290	0	30.29855075	#NAME?	4.90E-09	2.70E-07	-//-
AFLA_013300	0	22.7641012	#NAME?	1.11E-07	4.59E-06	-	Nitronate monooxygenase||Aldolase-type TIM barrel
AFLA_013320	0	95.66024166	#NAME?	8.60E-32	3.79E-29	-	Glycoside hydrolase superfamily||Glycoside hydrolase, catalytic domain||Glycoside hydrolase, family 5
AFLA_013330	0	12.40890714	#NAME?	3.39E-06	0.00010049	-	Proton-dependent oligopeptide transporter family||Major facilitator superfamily domain
AFLA_013340	0	45.95406438	#NAME?	1.31E-18	2.71E-16	-//-
AFLA_013350	0	138.567014	#NAME?	1.47E-07	5.93E-06	-//-
AFLA_013360	1.035851251	2002.692864	-10.917	4.98E-119	6.37E-115	-	Cyanovirin-N
AFLA_013370	0	202.3087546	#NAME?	4.48E-20	9.88E-18	-	Major facilitator superfamily||Major facilitator superfamily domain
AFLA_013400	0.353823853	1271.728018	-11.811	9.85E-50	8.39E-47	-	Ankyrin repeat-containing domain||Ankyrin repeat
AFLA_013410	0	309.3034616	#NAME?	1.69E-07	6.74E-06	-	GNAT domain||Acyl-CoA N-acyltransferase
AFLA_013420	0	20.00426494	#NAME?	2.27E-07	8.76E-06	-	Zn(2)-C6 fungal-type DNA-binding domain||Fungal transcription factor
AFLA_013440	0	17.26104174	#NAME?	3.11E-08	1.44E-06	-	Galactose-binding domain-like||Bacterial alpha-L-rhamnosidase||Six-hairpin glycosidase-like
AFLA_013480	0	19.08842467	#NAME?	6.36E-09	3.44E-07	-	Zn(2)-C6 fungal-type DNA-binding domain||Fungal transcription factor
AFLA_013490	0	12.75830475	#NAME?	0.0050902	0.047226	-	Amino acid/polyamine transporter I
AFLA_013520	0	393.0323658	#NAME?	5.26E-22	1.43E-19	-	Cytochrome P450
AFLA_013530	0	9.249829505	#NAME?	8.53E-05	0.0016633	-//-
AFLA_013540	0	274.4351631	#NAME?	1.79E-59	2.55E-56	-	Carboxylesterase type B, active site||Carboxylesterase type B, conserved site||Carboxylesterase, type B||Alpha/Beta hydrolase fold
AFLA_013550	0	79.79108041	#NAME?	1.59E-09	9.64E-08	-//-
AFLA_013560	0	330.2226412	#NAME?	9.54E-40	5.81E-37	-	Alpha/Beta hydrolase fold||Alpha/beta hydrolase fold-1
AFLA_013590	0	30.48807503	#NAME?	2.45E-13	2.74E-11	-//-
AFLA_013660	0	5.343363838	#NAME?	0.00497	0.046449	-	Peptidase M20, dimerisation domain||Amidohydrolase
AFLA_013670	0	31.54983884	#NAME?	9.71E-05	0.0018648	-	NAD(P)-binding domain||NmrA-like domain
AFLA_013680	0	29.21425824	#NAME?	8.54E-13	8.88E-11	-	Phosphoesterase
AFLA_013690	3.421130338	4323.068353	-10.303	1.22E-21	3.12E-19	-	Fungal chitin synthase||Chitin synthase||Nucleotide-diphospho-sugar transferases||Chitin synthase N-terminal
AFLA_013700	0.671052552	533.3597795	-9.6345	3.71E-77	9.49E-74	-	Major facilitator superfamily domain||Major facilitator superfamily
AFLA_013710	0.656407089	535.5626898	-9.6722	5.01E-25	1.64E-22	-	Membrane-associated, eicosanoid/glutathione metabolism (MAPEG) protein||Membrane associated eicosanoid/glutathione metabolism-like domain
AFLA_013720	0.335526276	133.1670629	-8.6326	5.05E-38	2.81E-35	-//-
AFLA_013730	0	29.46703129	#NAME?	6.63E-09	3.56E-07	-	AAA+ ATPase domain||Tetratricopeptide-like helical domain||P-loop containing nucleoside triphosphate hydrolase
AFLA_013740	0	30.70295728	#NAME?	0.00014784	0.0027002	-	Survival protein SurE-like phosphatase/nucleotidase
AFLA_013750	0	13.74631178	#NAME?	9.33E-07	3.14E-05	-	Necrosis inducing protein
AFLA_013760	0	10.42986271	#NAME?	2.39E-05	0.00056077	-	Glycoside hydrolase, family 61
AFLA_013770	0	26.38082658	#NAME?	4.18E-07	1.52E-05	-//-
AFLA_013780	0	13.38690662	#NAME?	1.30E-06	4.22E-05	-	Ricin B, lectin domain
AFLA_013820	0	23.15708785	#NAME?	1.45E-10	1.05E-08	-	Major facilitator, sugar transporter-like||Sugar/inositol transporter||Sugar transporter, conserved site||Major facilitator superfamily domain
AFLA_013830	0.707647707	503.2796443	-9.4741	1.84E-12	1.78E-10	-	Amino acid transporter, transmembrane domain
AFLA_013860	0.353823853	443.675406	-10.292	5.11E-62	8.17E-59	-	Sialidases
AFLA_013870	0	147.8919189	#NAME?	2.79E-42	1.98E-39	-	AhpD-like||Carboxymuconolactone decarboxylase-like
AFLA_013880	0	25.6700667	#NAME?	1.28E-11	1.07E-09	-	Alpha/Beta hydrolase fold||Lipase, secreted
AFLA_013890	0	42.52579004	#NAME?	1.79E-17	3.18E-15	-	Transcription factor domain, fungi
AFLA_013900	0	55.43984819	#NAME?	2.45E-19	5.21E-17	-	Transcription factor domain, fungi
AFLA_013910	0	7.503898412	#NAME?	0.00047692	0.0070736	-	Protein kinase-like domain
AFLA_013940	0	9.011712397	#NAME?	0.0017236	0.020401	-	Zn(2)-C6 fungal-type DNA-binding domain
AFLA_013960	0.335526276	142.2648638	-8.7279	1.49E-39	8.67E-37	-//-
AFLA_013970	0	21.62265326	#NAME?	6.04E-10	3.94E-08	-	AMP-dependent synthetase/ligase
AFLA_013980	0.707647707	1337.741176	-10.884	4.27E-107	2.73E-103	-	Aminopeptidase Y||Peptidase M28||PA domain
AFLA_013990	0	6.7938447	#NAME?	0.00096197	0.012601	-	Pyridoxal phosphate-dependent transferase||Pyridoxal phosphate-dependent transferase, major region, subdomain 1||Pyridoxal phosphate-dependent transferase, major region, subdomain 2||Aminotransferase, class I/classII||Aspartate/other aminotransferase
AFLA_014000	0	25.23776061	#NAME?	4.42E-05	0.00093868	-	Thioredoxin-like fold||Glutathione S-transferase, C-terminal-like||Glutathione S-transferase, N-terminal||Glutathione S-transferase, C-terminal
AFLA_014010	0.335526276	32.38225386	-6.5926	4.08E-06	0.00011841	-	Glycosyl transferase family 54||Transmembrane protein 246
AFLA_014020	0	17.35891724	#NAME?	0.0028281	0.030385	-//-
AFLA_014030	0	7.844010939	#NAME?	0.00033846	0.0053423	-//-
AFLA_014040	0	6.880300317	#NAME?	0.0009287	0.012241	-//-
AFLA_014050	0.66372982	1034.048158	-10.605	6.16E-40	3.94E-37	-	Pyrroline-5-carboxylate reductase, catalytic, N-terminal||NAD(P)-binding domain||Pyrroline-5-carboxylate reductase, dimerisation domain||Pyrroline-5-carboxylate reductase||6-phosphogluconate dehydrogenase C-terminal domain-like
AFLA_014090	0	47.03048414	#NAME?	7.29E-19	1.53E-16	-//-
AFLA_014100	2.640273818	5212.341072	-10.947	5.17E-54	6.01E-51	-	Cyanovirin-N
AFLA_014110	0	41.18767924	#NAME?	4.15E-17	6.98E-15	-	Amidohydrolase-related||Metal-dependent hydrolase||Metal-dependent hydrolase, composite domain
AFLA_014120	0	106.2060496	#NAME?	3.01E-34	1.42E-31	-	Transcription factor domain, fungi
AFLA_014130	0.335526276	34.95472865	-6.7029	9.78E-14	1.17E-11	-	Class I glutamine amidotransferase-like
AFLA_014140	0.689350129	501.5238854	-9.5069	1.39E-44	1.04E-41	-	Aldehyde dehydrogenase, C-terminal||Aldehyde/histidinol dehydrogenase||Aldehyde dehydrogenase domain||Aldehyde dehydrogenase, glutamic acid active site||Aldehyde dehydrogenase N-terminal domain
AFLA_014150	0	12.39211639	#NAME?	3.41E-06	0.0001009	-	NTF2-like domain
AFLA_014160	0.999256096	28.86593388	-4.8524	4.99E-10	3.27E-08	-	Alcohol dehydrogenase, C-terminal||Alcohol dehydrogenase superfamily, zinc-type||NAD(P)-binding domain||Alcohol dehydrogenase, zinc-type, conserved site||Alcohol dehydrogenase, N-terminal||Polyketide synthase, enoylreductase domain||GroES-like
AFLA_014230	606.3604875	145.0422133	2.0637	0.0015161	0.018407	-	Phosphatidylserine decarboxylase||Phosphatidylserine decarboxylase-related
AFLA_014240	85.72959584	25.46266211	1.7514	0.00010581	0.0020051	-//-
AFLA_014250	134.7015276	32.76311447	2.0396	1.01E-09	6.27E-08	-	Ferredoxin reductase-type FAD-binding domain||Ferric reductase, NAD binding domain
AFLA_014300	11.71409173	1.336153695	3.1321	0.0028469	0.03056	-	Putative sodium bile acid cotransporter
AFLA_014310	220.7530276	383.0379072	-0.79505	0.0028608	0.030633	-	Cytochrome b5, heme-binding site||Cytochrome b5-like heme/steroid binding domain||Acyl-CoA dehydrogenase/oxidase, N-terminal and middle domain||Acyl-CoA dehydrogenase/oxidase, N-terminal||Acyl-CoA dehydrogenase, conserved site||Acyl-CoA dehydrogenase/oxidase C-terminal||Acyl-CoA oxidase/dehydrogenase, central domain
AFLA_014470	40.60702545	90.11646213	-1.1501	0.00076276	0.010475	-	NAD(P)-binding domain||Short-chain dehydrogenase/reductase SDR
AFLA_014520	111.2440532	22.9468423	2.2774	1.94E-10	1.39E-08	-	Cupredoxin||Nitrite reductase, copper-type||Multicopper oxidase, type 3
AFLA_014950	2457.972606	1514.572431	0.69856	0.0043748	0.042277	-	Short-chain dehydrogenase/reductase SDR||NAD(P)-binding domain
AFLA_015120	131.9844114	61.71443071	1.0967	0.0026105	0.028624	-	6-phosphogluconate dehydrogenase, domain 2||Ketopantoate reductase, N-terminal domain||Ketopantoate reductase, C-terminal domain||Ketopantoate reductase ApbA/PanE||6-phosphogluconate dehydrogenase C-terminal domain-like||NAD(P)-binding domain
AFLA_015420	5999.423167	13810.97065	-1.2029	0.0052243	0.048121	-	Flavodoxin-like||Thiamin diphosphate-binding fold||Flavodoxin/nitric oxide synthase||Nitrite/sulphite reductase 4Fe-4S domain||Pyruvate flavodoxin/ferredoxin oxidoreductase, N-terminal||Nitrite/Sulfite reductase ferredoxin-like domain||Transketolase C-terminal/Pyruvate-ferredoxin oxidoreductase domain II||Nitrite/sulphite reductase iron-sulphur/sirohaem-binding site||Flavoprotein-like domain
AFLA_015580	9366.617602	3666.302028	1.3532	0.004596	0.043883	-	Short-chain dehydrogenase/reductase SDR||NAD(P)-binding domain
AFLA_015630	356.0620374	595.662347	-0.74237	0.0041465	0.04056	-	Patatin/Phospholipase A2-related||Acyl transferase/acyl hydrolase/lysophospholipase
AFLA_015780	2.691514436	19.06180406	-2.8242	0.0028696	0.030653	-	Tetrapeptide transporter, OPT1/isp4||Oligopeptide transporter, OPT superfamily
AFLA_015850	19.24320327	2.619433265	2.877	0.0038848	0.038741	-	Zn(2)-C6 fungal-type DNA-binding domain
AFLA_015860	31.74910785	7.166287774	2.1474	5.84E-05	0.0012006	-	Aconitase/3-isopropylmalate dehydratase large subunit, alpha/beta/alpha, subdomain 1/3||Aconitase/3-isopropylmalate dehydratase large subunit, alpha/beta/alpha domain||Aconitase/3-isopropylmalate dehydratase large subunit, alpha/beta/alpha, subdomain 2||Phosphatidylethanolamine-binding protein||Aconitase/isopropylmalate dehydratase
AFLA_015880	44.4796004	15.72285431	1.5003	0.00080982	0.010979	-	P-loop containing nucleoside triphosphate hydrolase||ABC transporter-like||ABC-2 type transporter
AFLA_015890	734.2752905	318.5575072	1.2048	0.00085626	0.011439	-//-
AFLA_015930	1318.492353	522.8484206	1.3344	1.38E-07	5.63E-06	-	P-loop containing nucleoside triphosphate hydrolase
AFLA_016120	8315.345158	3608.122742	1.2045	9.25E-07	3.12E-05	-	S-adenosyl-L-methionine-dependent methyltransferase||O-methyltransferase, family 2||O-methyltransferase COMT-type
AFLA_016130	5770.759956	2506.966744	1.2028	1.03E-06	3.45E-05	-	Winged helix-turn-helix DNA-binding domain
AFLA_016140	2758.088932	736.0150723	1.9059	3.43E-14	4.30E-12	-	Scytalone dehydratase||NTF2-like domain
AFLA_016220	52.19535834	22.71586377	1.2002	0.0049863	0.046535	-	LURP1-related protein domain||Tubby C-terminal-like domain
AFLA_016250	111.9078201	44.44301434	1.3323	5.36E-05	0.0011112	-	Nucleoside phosphorylase domain||Nucleoside phosphorylase
AFLA_016540	9.799763192	1.284530514	2.9315	0.0039691	0.039337	-	CHAT domain||Tetratricopeptide-like helical domain
AFLA_016580	399.0592394	179.737264	1.1507	2.64E-05	0.00061165	-//-
AFLA_016590	123.6974448	51.77045438	1.2566	0.0001109	0.0020912	-//-
AFLA_016600	725.2191909	393.5455576	0.88189	0.0007219	0.0099994	-	Isopenicillin N synthase-like||Aldolase-type TIM barrel||Oxoglutarate/iron-dependent dioxygenase||NADH:flavin oxidoreductase/NADH oxidase, N-terminal
AFLA_016610	139.67964	30.46270537	2.197	0.0039241	0.039073	-//-
AFLA_016900	96.02462902	177.1451295	-0.88346	0.002476	0.02736	-	Borealin, N-terminal
AFLA_017020	413.1159732	204.7595299	1.0126	0.00010586	0.0020051	-	PLAC8 motif-containing protein
AFLA_017080	11.88611116	2.281822627	2.381	0.00536	0.049089	-	CO dehydrogenase flavoprotein-like, FAD-binding, subdomain 2||FAD-binding, type 2||Berberine/berberine-like||FAD-binding, type 2, subdomain 1||FAD linked oxidase, N-terminal
AFLA_017410	3814.38679	349.4068835	3.4485	1.04E-07	4.36E-06	-	FMN-binding split barrel
AFLA_017590	185.77674	378.3779439	-1.0263	0.0028533	0.030604	-	Mpv17/PMP22
AFLA_017760	100.463313	50.32193063	0.99741	0.0023914	0.026609	-	Phenol hydroxylase, C-terminal dimerisation domain||FAD-binding domain||FAD/NAD(P)-binding domain||Thioredoxin-like fold
AFLA_018240	537.5486246	2897.659262	-2.4304	1.22E-05	0.00031493	-	Purine-cytosine permease||Nucleobase cation symporter-1, NCS1
AFLA_018410	711.2746934	1155.534013	-0.70008	0.0050069	0.046691	-	Zinc finger, C2H2-like||Zinc finger C2H2-type/integrase DNA-binding domain||Aberrant zinc-finger domain
AFLA_018450	1808.389983	946.551273	0.93395	0.00018094	0.0031733	-	Uncharacterised domain, di-copper centre||Tyrosinase copper-binding domain
AFLA_018460	98.65508084	25.7658074	1.9369	7.02E-08	3.03E-06	-//-
AFLA_018470	217.8160729	65.89132773	1.7249	9.66E-06	0.00025617	-//-
AFLA_018510	153.7971334	53.69858179	1.5181	8.50E-05	0.0016599	-	RmlC-like cupin domain||Cupin 2, conserved barrel||RmlC-like jelly roll fold||Uncharacterised conserved protein UCP019307, cupin-type
AFLA_018590	716.38787	216.6254303	1.7255	1.95E-09	1.16E-07	-	Aminotransferase, class I/classII||Pyridoxal phosphate-dependent transferase||Pyridoxal phosphate-dependent transferase, major region, subdomain 1||Pyridoxal phosphate-dependent transferase, major region, subdomain 2
AFLA_018600	160.2352604	74.17906464	1.1111	0.0044992	0.04325	-	Oxidoreductase, molybdopterin-binding domain||Moybdenum cofactor oxidoreductase, dimerisation||Eukaryotic molybdopterin oxidoreductase||Immunoglobulin E-set
AFLA_018770	410.4525229	677.0536967	-0.72205	0.0046949	0.044627	-//-
AFLA_018890	280.6351746	7.099124791	5.3049	1.17E-15	1.67E-13	-	Immunoglobulin-like fold||Fibronectin type III||SGNH hydrolase-type esterase domain
AFLA_018900	168.3258511	68.79067142	1.291	1.54E-05	0.00038542	-//-
AFLA_019000	81.23346432	19.46944666	2.0609	6.90E-08	2.99E-06	-//-
AFLA_019180	81.79961038	30.39108339	1.4284	0.00012958	0.0024009	-	Protein of unknown function DUF3759
AFLA_019200	644.8874985	210.6271831	1.6144	9.14E-10	5.78E-08	-	Domain of unknown function DUF1989
AFLA_019240	1195.731432	729.4087341	0.71309	0.0033006	0.034504	-//-
AFLA_019310	1035.503796	552.7789245	0.90556	0.0045375	0.043512	-	Acyl transferase/acyl hydrolase/lysophospholipase||Lysophospholipase, catalytic domain
AFLA_019420	461.8279032	926.1139369	-1.0038	7.14E-05	0.0014245	-	Major facilitator superfamily domain||Major facilitator superfamily
AFLA_019430	1188.992252	2270.714633	-0.93341	0.00015926	0.0028518	-	FAD-binding domain||FAD/NAD(P)-binding domain
AFLA_019440	1211.543399	2001.859035	-0.72449	0.0028806	0.030724	-//-
AFLA_019550	24.5591562	5.01558306	2.2918	0.00060746	0.0086007	-	Major facilitator superfamily||Major facilitator superfamily domain
AFLA_019560	28.78309275	1.708596769	4.0743	4.75E-09	2.63E-07	-//-
AFLA_019570	80.86745726	40.98152559	0.98059	0.0040605	0.039935	-	Major facilitator superfamily domain||Sugar transporter, conserved site||Major facilitator superfamily
AFLA_019620	9002.944753	5100.873606	0.81965	0.00085813	0.011452	-//-
AFLA_019650	2862.724866	946.468472	1.5968	2.67E-10	1.86E-08	-	Xylulose 5-phosphate/Fructose 6-phosphate phosphoketolase||Xylulose 5-phosphate/Fructose 6-phosphate phosphoketolase, conserved site||Probable phosphoketolase||Xylulose 5-phosphate/Fructose 6-phosphate phosphoketolase, C-terminal||Thiamin diphosphate-binding fold||Xylulose 5-phosphate/Fructose 6-phosphate phosphoketolase, thiamine diphosphate binding site||Xylulose 5-phosphate/Fructose 6-phosphat…
AFLA_019880	336.3709676	642.5233408	-0.9337	0.00027844	0.0045816	-	Kinetochore-associated protein Dsn1/Mis13
AFLA_019890	127.0244585	240.0009919	-0.91793	0.00096691	0.01264	-//-
AFLA_019950	156.9059225	62.55435139	1.3267	1.43E-05	0.00036054	-	GNAT domain||Acyl-CoA N-acyltransferase
AFLA_020020	922.8761512	108.3605071	3.0903	1.54E-05	0.00038552	-//-
AFLA_020110	359.0265666	177.8826877	1.0132	0.00043276	0.0065555	-//-
AFLA_020130	5.426946759	516.6913733	-6.573	1.76E-63	3.22E-60	-	MBF transcription factor complex subunit Mbp1/Res1/Res2||Ankyrin repeat-containing domain||Ankyrin repeat
AFLA_020400	248.3844063	429.6183053	-0.79048	0.0023822	0.02653	-//-
AFLA_020500	136.9646815	291.2040637	-1.0882	9.46E-05	0.001821	-	P-loop containing nucleoside triphosphate hydrolase||Small GTPase superfamily
AFLA_020590	735.6205496	341.4581252	1.1073	1.50E-05	0.00037647	-	Galactose mutarotase-like domain||Glycoside hydrolase-type carbohydrate-binding||Aldose 1-/Glucose-6-phosphate 1-epimerase
AFLA_020800	250.3683285	89.75611709	1.48	1.33E-07	5.44E-06	-//-
AFLA_020930	198.9479614	55.63742292	1.8383	0.0047621	0.045166	-	Protein of unknown function DUF3292
AFLA_021090	169.3472789	49.1356427	1.7851	0.0024685	0.027315	-	Alpha/Beta hydrolase fold||Domain of unknown function DUF2235
AFLA_021160	2097.713163	247.6015265	3.0827	3.96E-29	1.54E-26	-	Aldo/keto reductase||Aldo/keto reductase, conserved site||NADP-dependent oxidoreductase domain||Aldo/keto reductase/potassium channel subunit beta
AFLA_021290	128.4046162	52.27667865	1.2965	4.82E-05	0.0010095	-//-
AFLA_021300	156.9641813	36.51487198	2.1039	2.92E-05	0.00066273	-	Argonaute, linker 1 domain||Protein argonaute, N-terminal||Piwi domain||Ribonuclease H-like domain||PAZ domain
AFLA_021530	3313.0613	1988.861759	0.73622	0.0025453	0.028005	-	PLC-like phosphodiesterase, TIM beta/alpha-barrel domain
AFLA_022260	246.4065799	411.038034	-0.73823	0.0050885	0.047226	-	NUDIX hydrolase domain-like||NUDIX hydrolase domain
AFLA_022300	677.1714319	1132.41886	-0.74181	0.0031434	0.033067	-	WD40/YVTN repeat-like-containing domain||WD40-repeat-containing domain||WD40 repeat||WD40 repeat, conserved site||Minichromosome loss protein Mcl1, middle region
AFLA_022390	1744.590066	2838.018625	-0.702	0.0040355	0.039749	-	Mitochondrial substrate/solute carrier||Mitochondrial carrier domain
AFLA_022550	262.4238673	481.6360896	-0.87604	0.00079284	0.010795	-	Ribonuclease HII, helix-loop-helix cap domain||Ribonuclease H-like domain||Ribonuclease HII/HIII domain||Ribonuclease HII/HIII
AFLA_022820	177.9241104	64.76955582	1.4579	0.00043628	0.0065855	-//-
AFLA_022880	373.7894736	1311.122982	-1.8105	0.0026319	0.02876	-	Major facilitator superfamily domain||Proton-dependent oligopeptide transporter family
AFLA_023160	466.2381901	194.9048618	1.2583	2.03E-06	6.27E-05	-	Ankyrin repeat||Ankyrin repeat-containing domain
AFLA_023180	8.063568462	0.304029147	4.7291	0.0011044	0.014134	-	GNAT domain||Acyl-CoA N-acyltransferase
AFLA_023420	107.1236953	219.2225452	-1.0331	0.00031113	0.0050174	-	Transcription factor domain, fungi
AFLA_023430	311.2885499	147.9356531	1.0733	7.87E-05	0.0015519	-	Nucleotide-diphospho-sugar transferases||Glycosyltransferase, DXD sugar-binding motif
AFLA_023490	1502.357418	654.1930462	1.1994	0.00047557	0.0070631	-	Glycoside hydrolase, family 13||Glycoside hydrolase, catalytic domain||Alpha-amylase, thermostable||Glycosyl hydrolase, family 13, catalytic domain||Glycosyl hydrolase, all-beta||Glycoside hydrolase superfamily
AFLA_023500	11814.11177	2600.190634	2.1838	1.65E-05	0.00040682	-	Kre9/Knh1 family
AFLA_023510	608.5685266	88.76834377	2.7773	4.51E-09	2.50E-07	-	NAD(P)-binding domain||NAD-dependent epimerase/dehydratase, N-terminal domain
AFLA_023520	59.7294499	20.86793725	1.5172	0.0001015	0.0019311	-	Adenosine/AMP deaminase domain||Adenosine/AMP deaminase active site||Metal-dependent hydrolase||Adenosine/adenine deaminase
AFLA_023530	133.6508743	66.70874772	1.0025	0.0012642	0.0158	-	Alcohol dehydrogenase superfamily, zinc-type||NAD(P)-binding domain||GroES-like||Polyketide synthase, enoylreductase domain||Alcohol dehydrogenase, N-terminal
AFLA_023540	76.89238257	28.5894092	1.4274	7.59E-05	0.0015028	-	ABC transporter-like||P-loop containing nucleoside triphosphate hydrolase||ABC transporter, conserved site||AAA+ ATPase domain||ABC transporter type 1, transmembrane domain
AFLA_023570	27.02131472	8.378651529	1.6893	0.0017562	0.020675	-	MoeA, C-terminal, domain IV||MoaB/Mog domain||MoeA, N-terminal and linker domain
AFLA_023600	15044.0273	7385.966569	1.0263	0.0009182	0.012115	-//-
AFLA_023690	132.6113895	66.9161243	0.98678	0.001241	0.015593	-	Isochorismatase-like
AFLA_023760	1108.974175	156.0878014	2.8288	1.70E-25	5.70E-23	-	Uncharacterised protein family, zinc metallopeptidase-like
AFLA_023780	59.98323627	11.27674428	2.4112	1.77E-08	8.53E-07	-	Polyketide synthase, enoylreductase domain||GroES-like||Alcohol dehydrogenase superfamily, zinc-type||Alcohol dehydrogenase, C-terminal||NAD(P)-binding domain
AFLA_023810	1.010230942	20.3368718	-4.3313	4.67E-07	1.68E-05	-//-
AFLA_023870	393.7870463	107.8211738	1.8688	1.01E-11	8.66E-10	-//-
AFLA_023880	158.0431022	23.22675273	2.7665	2.43E-09	1.42E-07	-	Heat shock protein 70 family
AFLA_023890	69.64516844	10.29999574	2.7574	6.20E-07	2.15E-05	-//-
AFLA_023910	106.4904277	24.7972707	2.1025	5.15E-07	1.84E-05	-//-
AFLA_024000	9.632585731	0.355652328	4.7594	0.00088514	0.011715	-	FAD/NAD(P)-binding domain||FAD dependent oxidoreductase
AFLA_024100	1017.913689	2350.691828	-1.2075	2.21E-05	0.00052325	-//-
AFLA_024480	8066.947056	3671.471841	1.1357	4.52E-06	0.00012906	-	ATP-dependent 6-phosphofructokinase, eukaryotic-type||Phosphofructokinase, conserved site||Phosphofructokinase domain||ATP-dependent 6-phosphofructokinase
AFLA_024500	182.0507862	40.61925145	2.1641	1.05E-05	0.00027644	-	Protein of unknown function DUF4646
AFLA_024510	37.08823734	8.717513111	2.089	3.00E-05	0.00067703	-	Sugar transporter, conserved site||Major facilitator superfamily domain||Major facilitator, sugar transporter-like||Sugar/inositol transporter
AFLA_024530	151.2993561	15.86093311	3.2539	2.11E-05	0.00050545	-	ABC-2 type transporter||P-loop containing nucleoside triphosphate hydrolase||ABC transporter-like||CDR ABC transporter||AAA+ ATPase domain||ABC transporter, conserved site
AFLA_024540	86.81531282	6.098079846	3.8315	9.97E-07	3.34E-05	-	Signal transduction response regulator, receiver domain||Histidine kinase domain||CheY-like superfamily||Signal transduction histidine kinase-related protein, C-terminal||Histidine kinase-like ATPase, C-terminal domain
AFLA_024550	41.48296646	13.29437397	1.6417	0.00024299	0.0040662	-	Leucine-rich repeat domain, L domain-like
AFLA_024590	464.8989999	841.0560928	-0.85528	0.00070582	0.0098085	-	Zinc/iron permease
AFLA_024710	138.7803289	28.74357258	2.2715	7.71E-06	0.00020966	-//-
AFLA_024800	111.1379199	59.66483756	0.8974	0.0052423	0.048253	-	GNAT domain||Acyl-CoA N-acyltransferase
AFLA_024810	16.89336648	2.246990192	2.9104	0.00016781	0.0029715	-	Major facilitator superfamily domain||Major facilitator superfamily
AFLA_024970	1349.255759	2340.04807	-0.79437	0.0016784	0.020093	-	Histidine phosphatase superfamily
AFLA_024980	32.28840675	12.00984346	1.4268	0.0027721	0.029959	-//-
AFLA_025330	5966.293888	2280.848669	1.3873	1.86E-08	8.95E-07	-//-
AFLA_025380	127.9969969	52.28827622	1.2916	3.83E-05	0.00083765	-//-
AFLA_025390	49.5392307	20.38974593	1.2807	0.0016287	0.019589	-	Zinc/iron permease, fungal/plant||Zinc/iron permease
AFLA_025520	1083.525608	137.5251273	2.978	0.0002575	0.0042866	-//-
AFLA_025540	18.20618066	4.513273017	2.0122	0.0024798	0.027378	-	ATP-grasp fold, subdomain 2||ATP-grasp fold
AFLA_025710	126.0021553	257.7698479	-1.0326	0.0002364	0.0039777	-	Major facilitator superfamily domain||Major facilitator superfamily
AFLA_025720	244.8974269	1459.571692	-2.5753	0.00026068	0.0043226	-	Fungal transcription factor||Zn(2)-C6 fungal-type DNA-binding domain
AFLA_025900	24.66536356	0.659681475	5.2246	0.00084061	0.011279	-	NodB homology domain||Glycoside hydrolase/deacetylase, beta/alpha-barrel
AFLA_026040	2364.382928	957.2823728	1.3044	1.86E-07	7.32E-06	-	Glycoside hydrolase family 47
AFLA_026120	163.8054642	323.8879778	-0.98351	0.0039438	0.039147	-	Zn(2)-C6 fungal-type DNA-binding domain
AFLA_026130	314.4241592	576.9915349	-0.87584	0.00057962	0.0082798	-//-
AFLA_026310	681.7212407	348.3750043	0.96854	0.002716	0.029452	-	Coiled-coil domain containing protein 109, C-terminal
AFLA_026350	61.56322839	26.73290377	1.2035	0.0012748	0.015901	-	F-box domain||Leucine-rich repeat domain, L domain-like
AFLA_026690	362.2015748	611.4245605	-0.75538	0.0031998	0.03356	-	Chromo domain-like||RNA binding activity-knot of a chromodomain||MRG domain||MRG
AFLA_027050	275.3936673	103.8197459	1.4074	4.17E-05	0.0008946	-	Pyridoxal phosphate-dependent transferase||Pyridoxal phosphate-dependent transferase, major region, subdomain 1||Pyridoxal phosphate-dependent transferase, major region, subdomain 2||Cys/Met metabolism, pyridoxal phosphate-dependent enzyme
AFLA_027810	411.6190304	921.5560396	-1.1628	0.0032287	0.033815	-	Peptidase S8, subtilisin, Ser-active site||Peptidase S8/S53 domain||Proteinase propeptide inhibitor||Peptidase S8, subtilisin-related||Peptidase S8, subtilisin, His-active site||Peptidase S8 propeptide/proteinase inhibitor I9||Peptidase S8, subtilisin, Asp-active site
AFLA_027990	142.9175911	36.80998313	1.957	2.44E-09	1.42E-07	-//-
AFLA_028120	59.01079034	23.73852554	1.3137	0.00063492	0.0089202	-//-
AFLA_028370	541.320866	206.8054379	1.3882	0.0016486	0.019791	-	Survival protein SurE-like phosphatase/nucleotidase
AFLA_028760	57.99319966	122.7411307	-1.0817	0.00065505	0.0091728	-	Zinc finger C2H2-type/integrase DNA-binding domain||Zinc finger, C2H2-like||Zinc finger, C2H2||Transcription factor domain, fungi
AFLA_028770	160.7867425	66.70733539	1.2692	0.00078662	0.010722	-//-
AFLA_028780	237.3010643	596.0819731	-1.3288	5.54E-07	1.95E-05	-	FAD dependent oxidoreductase||FAD/NAD(P)-binding domain
AFLA_029120	89.77420873	694.656939	-2.9519	9.36E-06	0.00024935	-//-
AFLA_029130	4154.129843	2241.361963	0.89017	0.00030421	0.0049295	-	Ornithine cyclodeaminase, N-terminal||NAD(P)-binding domain||Ornithine cyclodeaminase/mu-crystallin
AFLA_029380	161.7812121	339.7048661	-1.0702	8.56E-05	0.0016658	-	Urease, gamma/gamma-beta subunit||Urease, alpha subunit||Metal-dependent hydrolase||Metal-dependent hydrolase, composite domain||Urease active site||Urease||Urease alpha-subunit, N-terminal domain||Urease nickel binding site||Urease, beta subunit||Urease, alpha subunit, C-terminal||Amidohydrolase-related
AFLA_029470	914.7599274	97.30937051	3.2327	2.19E-30	9.03E-28	-	SKP1/BTB/POZ domain||BTB/POZ domain
AFLA_029700	560.5609879	322.7303683	0.79654	0.0020938	0.023774	-	Peptidase M24, structural domain
AFLA_029800	977.2553999	453.6707789	1.1071	1.19E-05	0.00030678	-	Sphingomyelinase D/Phospholipase D||PLC-like phosphodiesterase, TIM beta/alpha-barrel domain
AFLA_029830	60.48597702	18.35587027	1.7204	0.0037927	0.038211	-	Ankyrin repeat-containing domain||Heterokaryon incompatibility||Ankyrin repeat
AFLA_030200	28.62571878	9.602979945	1.5758	0.0019282	0.022289	-//-
AFLA_030230	76.38975284	151.259257	-0.98557	0.0012235	0.015441	-	NAD(P)-binding domain||NAD-dependent epimerase/dehydratase, N-terminal domain
AFLA_030360	61.03006237	20.13984185	1.5995	4.07E-05	0.00087877	-	GroES-like||Polyketide synthase, enoylreductase domain||Alcohol dehydrogenase, N-terminal||NAD(P)-binding domain||Alcohol dehydrogenase superfamily, zinc-type||Alcohol dehydrogenase, C-terminal
AFLA_030390	412.2897599	873.5518389	-1.0832	1.94E-05	0.00046864	-	Homeodomain-like||Homeobox domain||Homeobox, conserved site
AFLA_030450	2798.728968	863.3055686	1.6968	1.94E-11	1.58E-09	-	Glycosyl transferase, family 1
AFLA_030460	612.4417548	1015.281288	-0.72923	0.0038544	0.038499	-	Small GTPase superfamily, ARF type||P-loop containing nucleoside triphosphate hydrolase||Small GTPase superfamily, ARF/SAR type||Small GTP-binding protein domain
AFLA_030490	47.46268622	18.69919085	1.3438	0.0011207	0.014314	-//-
AFLA_030580	2608.408106	4249.574526	-0.70415	0.0040607	0.039935	-	Zinc finger, C2H2-like||Zinc finger C2H2-type/integrase DNA-binding domain||Zinc finger, C2H2
AFLA_030710	19093.73127	11710.66579	0.70528	0.0037461	0.037861	-	Alpha-D-phosphohexomutase superfamily||Alpha-D-phosphohexomutase, alpha/beta/alpha domain II||Alpha-D-phosphohexomutase, C-terminal||Alpha-D-phosphohexomutase, alpha/beta/alpha domain I||Alpha-D-phosphohexomutase, alpha/beta/alpha domain III||Alpha-D-phosphohexomutase, conserved site||Alpha-D-phosphohexomutase, alpha/beta/alpha I/II/III
AFLA_030930	26845.41502	16287.78491	0.72089	0.0034966	0.035849	-	Fructose-bisphosphate aldolase, class II, yeast/E. coli subtype||Aldolase-type TIM barrel||Ketose-bisphosphate aldolase, class-II
AFLA_031000	2827.644937	5441.117447	-0.9443	0.00011512	0.0021618	-	High mobility group box domain
AFLA_031030	236.3371495	454.9158403	-0.94475	0.00032419	0.005168	-//-
AFLA_031090	4857.188002	581.771491	3.0616	0.00074087	0.010218	-//-
AFLA_031100	253.1913376	104.7053579	1.2739	6.21E-05	0.0012667	-//-
AFLA_031140	908.0445229	489.4625195	0.89156	0.00035354	0.0055393	-	P-loop containing nucleoside triphosphate hydrolase||Alpha/Beta hydrolase fold||NB-ARC
AFLA_031480	532.3953273	290.8336221	0.8723	0.00076916	0.010506	-//-
AFLA_031570	66884.16054	27255.87697	1.2951	1.81E-06	5.74E-05	-	Thiamine pyrophosphate enzyme, N-terminal TPP-binding domain||Thiamine pyrophosphate enzyme, central domain||Thiamin diphosphate-binding fold||Thiamine pyrophosphate enzyme, C-terminal TPP-binding||Thiamine pyrophosphate (TPP)-dependent enzyme||DHS-like NAD/FAD-binding domain
AFLA_031740	230.0574283	451.2855485	-0.97205	0.0002393	0.004015	-//-
AFLA_031900	2679.25363	571.746664	2.2284	6.30E-18	1.22E-15	-	Xylulose 5-phosphate/Fructose 6-phosphate phosphoketolase, conserved site||Xylulose 5-phosphate/Fructose 6-phosphate phosphoketolase||Xylulose 5-phosphate/Fructose 6-phosphate phosphoketolase, thiamine diphosphate binding site||Thiamin diphosphate-binding fold||Transketolase C-terminal/Pyruvate-ferredoxin oxidoreductase domain II||Xylulose 5-phosphate/Fructose 6-phosphate phosphoketolase, N-termi…
AFLA_031910	1264.289557	230.5557504	2.4551	1.39E-10	1.01E-08	-	Acetate/propionate kinase||Aliphatic acid kinase, short-chain, conserved site||Aliphatic acid kinase, short-chain
AFLA_032170	1228.435528	2104.775261	-0.77684	0.0015708	0.019	-	Serine/threonine-protein kinase, active site||Protein kinase, ATP binding site||Protein kinase-like domain||Protein kinase domain
AFLA_032370	3619.173929	2016.379077	0.84389	0.00054649	0.0079126	-	Small GTP-binding protein domain||P-loop containing nucleoside triphosphate hydrolase||Small GTPase superfamily
AFLA_032420	12.49858186	33.13251087	-1.4065	0.0038455	0.03844	-	Fungal transcription factor
AFLA_032520	195.8864092	414.1897556	-1.0803	5.80E-05	0.0011946	-	Ribonuclease H2, subunit B
AFLA_032980	37.34686569	15.15820737	1.3009	0.0045807	0.04377	-	Major facilitator superfamily||Major facilitator superfamily domain
AFLA_033110	178.0011833	94.56327833	0.91253	0.0017167	0.02036	-//-
AFLA_033120	4075.109865	2239.118437	0.86391	0.0048627	0.045746	-	B-cell receptor-associated protein 29/31
AFLA_033410	22844.0355	39127.96046	-0.77638	0.0014269	0.017457	-//-
AFLA_033450	365.7796465	38.75669701	3.2385	0.0020434	0.023263	-	Rieske [2Fe-2S] iron-sulphur domain||FAD/NAD(P)-binding domain||FAD dependent oxidoreductase
AFLA_033460	47.45293824	13.31116472	1.8339	3.69E-05	0.00080982	-	RmlC-like cupin domain||RmlC-like jelly roll fold
AFLA_033600	17.85233831	86.6208354	-2.2786	0.0046017	0.043905	-//-
AFLA_033950	72.64040046	1862.355363	-4.6802	1.22E-07	5.02E-06	-	FMN-binding split barrel||UbiD-like decarboxylase/ferulic acid decarboxylase 1||UbiD decarboxylyase family
AFLA_033960	4.453329475	227.1207	-5.6724	0.00037729	0.005854	-	Flavoprotein||Flavin prenyltransferase UbiX/Pad1
AFLA_034070	687.9285914	412.9084938	0.73644	0.0041232	0.040364	-	Mitochondrial substrate/solute carrier||Mitochondrial carrier protein||Mitochondrial carrier domain
AFLA_034080	1813.666077	577.5617705	1.6509	8.51E-11	6.40E-09	-	Helicase superfamily 1/2, ATP-binding domain||Helicase, C-terminal||Rad54, N-terminal||P-loop containing nucleoside triphosphate hydrolase||SNF2-related, N-terminal domain
AFLA_034100	619.3997218	1006.732901	-0.70074	0.0054285	0.049574	-	ABC transporter-like||P-loop containing nucleoside triphosphate hydrolase||ABC transporter, conserved site||ABC transporter type 1, transmembrane domain||AAA+ ATPase domain
AFLA_034410	982.3844233	1942.121967	-0.98327	0.0013542	0.016695	-	Pyridoxal phosphate-dependent transferase, major region, subdomain 2||Pyridoxal phosphate-dependent transferase||Pyridoxal phosphate-dependent transferase, major region, subdomain 1||Aminotransferase, class I/classII
AFLA_034640	2663.383791	6106.432562	-1.1971	0.00016032	0.0028664	-	PA domain||Peptidase M28
AFLA_034670	4976.896095	1643.132431	1.5988	9.00E-11	6.73E-09	-	WGR domain||BRCT domain||Poly(ADP-ribose) polymerase, regulatory domain||Poly(ADP-ribose) polymerase, catalytic domain
AFLA_034770	179.7420165	30.62365194	2.5532	2.02E-06	6.26E-05	-	Cytochrome P450||Cytochrome P450, E-class, group I||Cytochrome P450, conserved site
AFLA_034780	148.3564165	13.33528344	3.4757	1.16E-05	0.00030145	-	Cytochrome P450
AFLA_034820	48.10198559	5.683476364	3.0813	7.49E-10	4.81E-08	-//-
AFLA_034840	3024.413436	1230.941746	1.2969	1.35E-07	5.50E-06	-	Protein of unknown function DUF4246
AFLA_035040	156.490962	279.1306487	-0.83486	0.0025058	0.027618	-	Acyl-CoA N-acyltransferase||GNAT domain
AFLA_035290	1089.034404	228.2317837	2.2545	0.001825	0.021328	-	Thiamin diphosphate-binding fold||Dehydrogenase, E1 component||Pyruvate dehydrogenase (acetyl-transferring) E1 component, alpha subunit, subgroup y
AFLA_035520	116.0828587	299.5668644	-1.3677	8.42E-07	2.86E-05	-	Purine-cytosine permease||Purine-cytosine permease Fcy2/21/22
AFLA_035950	321.6580287	168.831857	0.92994	0.00075353	0.010362	-	S-adenosyl-L-methionine-dependent methyltransferase
AFLA_036100	41.5477182	14.79397613	1.4898	0.0007123	0.0098879	-//-
AFLA_036110	63.39709939	16.76319069	1.9191	0.00045323	0.0067961	-	Glyoxalase/Bleomycin resistance protein/Dihydroxybiphenyl dioxygenase||4-hydroxyphenylpyruvate dioxygenase||Glyoxalase/fosfomycin resistance/dioxygenase domain
AFLA_036180	349.3173604	643.5967465	-0.88162	0.00059706	0.0084815	-	Chromo/chromo shadow domain||Chromo domain-like||Chromo domain||Chromo shadow domain
AFLA_036350	199.8041104	387.1373389	-0.95426	0.00031807	0.0050995	-	E3 SUMO-protein ligase Nse2 (Mms21)||Zinc finger, RING/FYVE/PHD-type||Zinc finger, MIZ-type
AFLA_036420	315.2272885	131.2753299	1.2638	0.0039588	0.039266	-	Major facilitator superfamily domain||Major facilitator, sugar transporter-like
AFLA_036780	148.0845631	295.818848	-0.99829	0.00028135	0.0046116	-	Amidase, conserved site||Amidase signature domain||Amidase
AFLA_036930	496.225705	1411.719184	-1.5084	2.69E-09	1.54E-07	-//-
AFLA_037240	302.9124197	526.1071485	-0.79646	0.0020212	0.023134	-	Biotinyl protein ligase (BPL) and lipoyl protein ligase (LPL), catalytic domain
AFLA_037420	639.5521977	338.8053161	0.91661	0.00038051	0.0058896	-	P-loop containing nucleoside triphosphate hydrolase||Polynucleotide kinase 3 phosphatase||HAD-like domain||HAD-superfamily hydrolase,subfamily IIIA
AFLA_037480	34649.8609	21011.08134	0.7217	0.0034324	0.035505	-	Enolase N-terminal domain-like||Enolase, N-terminal||Enolase, conserved site||Enolase, C-terminal TIM barrel domain||Enolase||Enolase C-terminal domain-like
AFLA_038230	1145.112072	466.9701379	1.2941	2.43E-07	9.29E-06	-	Protein of unknown function DUF4267
AFLA_038240	132.9298721	51.10735915	1.3791	1.23E-05	0.00031493	-	Major facilitator superfamily||Major facilitator superfamily domain
AFLA_038260	341.501797	24.48716452	3.8018	2.65E-11	2.12E-09	-//-
AFLA_038270	217.7959407	49.471813	2.1383	0.0040154	0.039582	-//-
AFLA_038290	675.7055876	162.5558387	2.0555	1.73E-14	2.19E-12	-	Fungal STAND N-terminal Goodbye domain||P-loop containing nucleoside triphosphate hydrolase||Tetratricopeptide-like helical domain||Tetratricopeptide repeat-containing domain||Tetratricopeptide repeat
AFLA_038510	48.4704364	17.05650612	1.5068	0.00033621	0.0053132	-	Amino acid/polyamine transporter I||Amino acid permease/ SLC12A domain
AFLA_038580	8593.619961	4325.955785	0.99025	0.00071574	0.0099248	-	RTA-like protein
AFLA_038610	184.8336775	398.8860738	-1.1097	0.0041639	0.040638	-	Ankyrin repeat-containing domain||Ankyrin repeat
AFLA_038650	2344.917535	116.0337416	4.3369	1.22E-51	1.20E-48	-	Aspartic peptidase A1 family||Peptidase family A1 domain||Aspartic peptidase, active site||Aspartic peptidase domain
AFLA_038700	17.31672853	51.66217623	-1.5769	0.0022617	0.02532	-	Peptidase M28
AFLA_038730	103.6964506	51.4871302	1.0101	0.0020254	0.023141	-	Glycoside hydrolase family 26||Glycoside hydrolase superfamily||Glycosyl hydrolase family 26 domain||Glycoside hydrolase, catalytic domain
AFLA_038890	82.69150627	38.39763092	1.1067	0.0011418	0.014525	-	Major facilitator superfamily||Major facilitator superfamily domain
AFLA_038910	417.5605596	200.122778	1.0611	0.00023887	0.0040131	-	P-loop containing nucleoside triphosphate hydrolase
AFLA_039110	47.93365528	13.64752441	1.8124	2.56E-05	0.0005958	-	Cytochrome P450
AFLA_039120	101.9591585	21.55994928	2.2416	4.82E-10	3.18E-08	-	Cytochrome P450, conserved site||Cytochrome P450, E-class, group I||Cytochrome P450
AFLA_039180	113.1717548	46.3188124	1.2888	6.41E-05	0.0013017	-	Major facilitator superfamily||Major facilitator superfamily domain
AFLA_039190	341.1122163	172.3322303	0.98505	0.00020187	0.0034831	-//-
AFLA_039290	117.5959129	27.78270292	2.0816	4.93E-05	0.0010315	-	Alpha/Beta hydrolase fold||Alpha/beta hydrolase fold-1
AFLA_039300	988.6742141	370.4636158	1.4162	1.67E-08	8.13E-07	-//-
AFLA_039360	459.458246	253.2862982	0.85916	0.0012869	0.016021	-	ABC transporter, conserved site||ABC transporter type 1, transmembrane domain||AAA+ ATPase domain||P-loop containing nucleoside triphosphate hydrolase||ABC transporter-like
AFLA_039450	366.1702206	103.6871271	1.8203	3.61E-07	1.33E-05	-	Beta-lactamase-related||Beta-lactamase/transpeptidase-like
AFLA_039480	10.83924805	0.641639785	4.0784	0.0010403	0.013473	-//-
AFLA_039490	17.25084245	2.993127283	2.5269	0.0004441	0.0066877	-	Polyketide synthase, enoylreductase domain||Alcohol dehydrogenase, N-terminal||GroES-like||Alcohol dehydrogenase, C-terminal||Alcohol dehydrogenase superfamily, zinc-type||NAD(P)-binding domain
AFLA_039530	322.4434682	140.9151274	1.1942	6.76E-05	0.0013577	-	Glutamine synthetase/guanido kinase, catalytic domain||Glutamine synthetase, catalytic domain
AFLA_039650	154.0949572	728.9368653	-2.242	7.04E-13	7.46E-11	-	Ferredoxin reductase-type FAD-binding domain||Riboflavin synthase-like beta-barrel||NADH:cytochrome b5 reductase (CBR)||Oxidoreductase, FAD-binding domain||Oxidoreductase FAD/NAD(P)-binding||Flavoprotein pyridine nucleotide cytochrome reductase
AFLA_039690	196.7036858	58.94495399	1.7386	3.78E-06	0.00010983	-	Histidine phosphatase superfamily, clade-1||Histidine phosphatase superfamily
AFLA_039700	9.836358347	1.284530514	2.9369	0.0039407	0.039147	-	Pyruvate/Phosphoenolpyruvate kinase-like domain||HpcH/HpaI aldolase/citrate lyase domain
AFLA_039730	63.33842502	20.1721724	1.6507	0.0012497	0.015633	-	Alpha/Beta hydrolase fold||Peptidase S33 tripeptidyl aminopeptidase-like, C-terminal
AFLA_039780	1120.722493	600.4235064	0.90038	0.00028273	0.0046283	-	Polyketide synthase, phosphopantetheine-binding domain||Polyketide synthase, ketoreductase domain||Phosphopantetheine binding ACP domain||NAD(P)-binding domain
AFLA_039810	89.14225059	22.36879035	1.9946	0.0035691	0.036475	-	Threonine/Serine exporter, ThrE||Putative threonine/serine exporter
AFLA_039830	871.3028891	156.5863423	2.4762	4.08E-20	9.14E-18	-//-
AFLA_039840	88.44300446	7.287575826	3.6012	8.81E-17	1.41E-14	-	Alpha/Beta hydrolase fold||Alpha/beta hydrolase fold-1
AFLA_039950	83.63219901	42.02152289	0.99293	0.0040774	0.040008	-	Heterokaryon incompatibility||Ankyrin repeat||Ankyrin repeat-containing domain
AFLA_040150	1141.23971	2241.299511	-0.97373	6.74E-05	0.0013567	-	Amino acid/polyamine transporter I
AFLA_040390	795.9176115	308.7323333	1.3663	9.16E-08	3.86E-06	-	Amino acid/polyamine transporter I
AFLA_040400	169.0189458	57.83651475	1.5471	2.00E-05	0.00048098	-//-
AFLA_040430	1716.651207	4803.051471	-1.4844	0.00014364	0.0026273	-	Peptidase S53, activation domain||Proteinase propeptide inhibitor||Peptidase S8, subtilisin, Ser-active site||Peptidase S8/S53 domain||Sedolisin domain
AFLA_040800	1121.121063	661.7872396	0.7605	0.0019791	0.022775	-//-
AFLA_040820	133.9472322	34.05977103	1.9755	0.00020084	0.0034713	-	NB-ARC||NACHT-NTPase and P-loop NTPases, N-terminal domain||Tetratricopeptide repeat||P-loop containing nucleoside triphosphate hydrolase||Tetratricopeptide-like helical domain||Tetratricopeptide repeat-containing domain
AFLA_040840	591.0468726	196.6143588	1.5879	0.00020628	0.0035496	-	Protein kinase domain||Protein kinase-like domain
AFLA_040880	7.11190087	0.304029147	4.548	0.0028583	0.030631	-	Alpha/beta hydrolase fold-3||Alpha/Beta hydrolase fold
AFLA_040890	24.45423121	1.99583517	3.615	3.44E-07	1.28E-05	-	Alpha/Beta hydrolase fold||Dienelactone hydrolase
AFLA_040930	90.50369511	23.6147356	1.9383	9.57E-08	4.02E-06	-	FAD/NAD(P)-binding domain||FAD-binding domain
AFLA_040960	233.079489	82.78706497	1.4933	2.22E-07	8.56E-06	-	Arylamine N-acetyltransferase
AFLA_040990	79.81934026	11.96679919	2.7377	1.21E-09	7.42E-08	-//-
AFLA_041000	25.45713942	8.771638181	1.5372	0.0046503	0.044236	-//-
AFLA_041030	1558.183611	722.1056862	1.1096	7.05E-06	0.00019371	-	Aldo/keto reductase, conserved site||Aldo/keto reductase||NADP-dependent oxidoreductase domain||Aldo/keto reductase/potassium channel subunit beta
AFLA_041110	97.96573071	49.64366269	0.98067	0.0028157	0.030276	-//-
AFLA_041150	21.83102811	1.959751791	3.4776	0.0018	0.021074	-	HTH CenpB-type DNA-binding domain||Homeodomain-like||DDE superfamily endonuclease domain
AFLA_041160	346.035325	62.42251101	2.4708	3.97E-17	6.83E-15	-	Isopenicillin N synthase-like||Oxoglutarate/iron-dependent dioxygenase
AFLA_041200	69.38887283	30.94822467	1.1648	0.001315	0.016276	-	Pyridoxal phosphate-dependent transferase, major region, subdomain 1||Pyridoxal phosphate-dependent transferase||Pyridoxal phosphate-dependent transferase, major region, subdomain 2||Aminotransferases, class-I, pyridoxal-phosphate-binding site||Aminotransferase, class I/classII
AFLA_041280	1116.954453	395.2661073	1.4987	5.41E-09	2.97E-07	-	FAD/NAD(P)-binding domain||Flavin monooxygenase-like
AFLA_041530	387.4365331	634.9334191	-0.71265	0.0050602	0.047085	-	GPI ethanolamine phosphate transferase 1||Type I phosphodiesterase/nucleotide pyrophosphatase/phosphate transferase||Alkaline phosphatase-like, alpha/beta/alpha||Alkaline-phosphatase-like, core domain||GPI ethanolamine phosphate transferase 1, C-terminal
AFLA_041630	164.9619562	53.69928796	1.6192	2.01E-07	7.88E-06	-	Ankyrin repeat||Ankyrin repeat-containing domain
AFLA_041650	331.3276707	88.48412403	1.9048	0.00046645	0.0069506	-	Siderophore iron transporter 1/trichothecene efflux pump Tri12||Major facilitator superfamily domain
AFLA_041680	6422.789718	10869.50531	-0.75901	0.0019027	0.022074	-	Major facilitator superfamily||Major facilitator superfamily domain
AFLA_041830	783.2895546	453.7704827	0.78758	0.0018329	0.021401	-	Guanine deaminase||Metal-dependent hydrolase||Amidohydrolase-related
AFLA_041840	5095.040276	10398.60916	-1.0292	1.93E-05	0.00046675	-	Glycine dehydrogenase (decarboxylating)||Glycine cleavage system P protein||Pyridoxal phosphate-dependent transferase||Pyridoxal phosphate-dependent transferase, major region, subdomain 1
AFLA_041900	975.6226457	567.9211217	0.78063	0.0019776	0.022775	-	Amidase signature domain||Amidase
AFLA_041950	917.1842169	337.881208	1.4407	1.67E-08	8.13E-07	-	Pectin lyase fold||Pectate lyase superfamily protein||Pectin lyase fold/virulence factor
AFLA_041970	154.3777299	52.0971456	1.5672	7.26E-06	0.00019888	-	Chitin-binding protein, N-terminal
AFLA_042000	443.0535569	145.5856385	1.6056	1.83E-06	5.77E-05	-	D-isomer specific 2-hydroxyacid dehydrogenase, NAD-binding domain conserved site 1||D-isomer specific 2-hydroxyacid dehydrogenase, NAD-binding domain conserved site||D-isomer specific 2-hydroxyacid dehydrogenase, catalytic domain||D-isomer specific 2-hydroxyacid dehydrogenase, NAD-binding domain||NAD(P)-binding domain
AFLA_042090	4256.573446	2588.478403	0.71759	0.0034453	0.03558	-	FAS1 domain
AFLA_042140	90.94537324	43.79798881	1.0541	0.0017249	0.020401	-	Translation protein, beta-barrel domain||Translation elongation factor EFTu/EF1A, C-terminal||Translation elongation factor EF1A/initiation factor IF2gamma, C-terminal||P-loop containing nucleoside triphosphate hydrolase||Transcription factor, GTP-binding domain
AFLA_042490	783.7163283	403.909719	0.9563	0.00014137	0.0025895	-	Uncharacterised conserved protein UCP036630||PEP-utilising enzyme, mobile domain||Domain of unknown function DUF126||Aconitase/3-isopropylmalate dehydratase large subunit, alpha/beta/alpha, subdomain 1/3||Domain of unknown function DUF521||Aconitase/3-isopropylmalate dehydratase, swivel
AFLA_042500	235.5453451	50.5116046	2.2213	1.12E-13	1.31E-11	-	Alpha/Beta hydrolase fold||Alpha/beta hydrolase fold-3
AFLA_042510	146.2202298	62.217786	1.2327	4.26E-05	0.00091094	-//-
AFLA_042540	394.4264112	86.91862154	2.182	4.94E-12	4.56E-10	-//-
AFLA_042610	964.5112867	391.1637251	1.302	2.99E-07	1.14E-05	-//-
AFLA_042620	9.497179956	0.963710622	3.3008	0.0024393	0.027072	-//-
AFLA_042830	8.902969829	0.928878186	3.2607	0.0042006	0.040934	-	Mannose-6-phosphate isomerase, type I||Phosphomannose isomerase, type I, conserved site||RmlC-like jelly roll fold||RmlC-like cupin domain||Mannose-6-phosphate isomerase
AFLA_042870	417.5250987	1158.391423	-1.4722	8.26E-09	4.30E-07	-	Claspin||DNA replication checkpoint mediator, MRC1 domain
AFLA_042900	3828.429242	7343.5096	-0.93972	0.0012263	0.015446	-//-
AFLA_043430	154.9575351	54.1279909	1.5174	0.0016853	0.020138	-	Leucine-rich repeat domain, L domain-like
AFLA_043460	69.85617127	13.03000334	2.4226	4.00E-09	2.25E-07	-	P-loop containing nucleoside triphosphate hydrolase||Nucleoside phosphorylase||Nucleoside phosphorylase domain
AFLA_043470	52.9664569	7.253994335	2.8682	8.37E-08	3.56E-06	-	Ankyrin repeat||Ankyrin repeat-containing domain
AFLA_043510	201.8856349	44.79170578	2.1722	2.17E-12	2.08E-10	-	Protein kinase domain||Protein kinase-like domain
AFLA_043630	1477.876506	135.1244905	3.4512	0.0010695	0.013742	-//-
AFLA_043710	343.4072799	190.9364264	0.84683	0.0015724	0.019	-	Zn(2)-C6 fungal-type DNA-binding domain||Fungal transcription factor
AFLA_043720	869.6361486	533.6110235	0.70462	0.0048256	0.045532	-	Helicase, C-terminal||DEAD/DEAH-box helicase, putative||Helicase superfamily 1/2, ATP-binding domain||DEAD/DEAH box helicase domain||P-loop containing nucleoside triphosphate hydrolase||CDT1 Geminin-binding domain-like
AFLA_043760	293.6410446	662.5079903	-1.1739	5.95E-06	0.00016527	-	Zinc finger C2H2-type/integrase DNA-binding domain||Zinc finger, C2H2
AFLA_043800	197.7543946	82.90264308	1.2542	1.54E-05	0.00038542	-	Ureohydrolase domain||Ureohydrolase
AFLA_043810	102.1299696	53.65300763	0.92868	0.0033124	0.034571	-	Heterokaryon incompatibility
AFLA_043860	4889.708597	2329.329195	1.0698	0.00021864	0.0037253	-//-
AFLA_044040	51.19979136	102.8472344	-1.0063	0.0042271	0.04116	-	Amino acid/polyamine transporter I
AFLA_044080	197.86418	356.6801541	-0.85012	0.0014232	0.017453	-	Major facilitator superfamily domain||Tetracycline resistance protein TetA/multidrug resistance protein MdtG||Major facilitator superfamily
AFLA_044240	70.45155275	33.48495515	1.0731	0.002999	0.031792	-//-
AFLA_044250	34.88722494	9.941841527	1.8111	0.0021433	0.024207	-	Transcription factor domain, fungi
AFLA_044420	33.96234901	9.584938255	1.8251	0.000223	0.0037727	-//-
AFLA_044480	1506.267373	2726.841947	-0.85625	0.00051197	0.0074891	-	MCM domain||Mini-chromosome maintenance protein||DNA replication licensing factor Mcm7||MCM OB domain||Mini-chromosome maintenance, conserved site||AAA+ ATPase domain||P-loop containing nucleoside triphosphate hydrolase||Nucleic acid-binding, OB-fold||MCM N-terminal domain
AFLA_044580	3840.300473	1102.679102	1.8002	0.00062849	0.0088591	-//-
AFLA_045050	47.85427659	19.57394397	1.2897	0.0018889	0.021934	-//-
AFLA_045110	119.775925	22.87681034	2.3884	0.00012527	0.0023346	-	Phytanoyl-CoA dioxygenase
AFLA_045130	8.760241323	0.980501367	3.1594	0.0042859	0.041574	-	Heterokaryon incompatibility
AFLA_045170	142.9931241	254.2222869	-0.83014	0.0027227	0.029499	-	Alpha/beta hydrolase fold-1||Epoxide hydrolase-like||Alpha/Beta hydrolase fold
AFLA_045290	3888.028927	1315.267562	1.5637	0.00022052	0.0037419	-	Glycoside hydrolase superfamily||Cellulose-binding domain, fungal||Glycoside hydrolase, catalytic domain||Glycoside hydrolase, family 5
AFLA_045380	128.2970254	21.97830559	2.5453	7.21E-07	2.48E-05	-	NAD(P)-binding domain||Oxidoreductase, N-terminal
AFLA_045500	47.65669235	2.906671667	4.0352	1.16E-12	1.17E-10	-	Cytochrome P450
AFLA_045590	1230.916996	624.8851516	0.97807	7.84E-05	0.0015491	-//-
AFLA_045610	116.3610755	60.45722697	0.94462	0.0026183	0.02866	-	Cholinesterase||Carboxylesterase, type B||Alpha/Beta hydrolase fold||Carboxylesterase type B, active site
AFLA_045680	347.616645	203.556858	0.77207	0.0042818	0.041567	-	GNAT domain||Acyl-CoA N-acyltransferase
AFLA_046110	24.82635264	2.959545792	3.0684	3.23E-06	9.61E-05	-//-
AFLA_046190	453.6900001	1579.231223	-1.7994	0.00028481	0.004651	-	Nickel/cobalt transporter, high-affinity
AFLA_046210	165.7407105	761.0386447	-2.199	0.00099969	0.013015	-//-
AFLA_046660	48.75474056	117.613339	-1.2704	0.00036284	0.005671	-	Mitochondrial substrate/solute carrier||Mitochondrial carrier domain
AFLA_046670	149.5194199	300.0349804	-1.0048	0.0008319	0.011207	-	Major facilitator superfamily||Major facilitator superfamily domain
AFLA_046730	4547.118282	2417.569955	0.91139	0.00020589	0.0035476	-	Bactericidal permeability-increasing protein, alpha/beta domain
AFLA_046750	442.8517484	761.0712725	-0.78121	0.0022494	0.025249	-	NADH:flavin oxidoreductase/NADH oxidase, N-terminal||Aldolase-type TIM barrel
AFLA_046760	980.3973115	122.4878409	3.0007	5.81E-06	0.00016222	-	6-phosphogluconate dehydrogenase C-terminal domain-like||Glycerol-3-phosphate dehydrogenase, NAD-dependent, C-terminal||NAD(P)-binding domain||Glycerol-3-phosphate dehydrogenase, NAD-dependent, N-terminal||Glycerol-3-phosphate dehydrogenase, NAD-dependent||6-phosphogluconate dehydrogenase, domain 2
AFLA_046830	179.3162847	79.57368458	1.1721	6.75E-05	0.0013567	-	Band 7 domain||Flotillin family
AFLA_047040	104.2931785	30.00505762	1.7974	2.18E-07	8.44E-06	-	BRCT domain
AFLA_047130	666.4480296	327.4561317	1.0252	4.71E-05	0.00099223	-	Glutathione S-transferase, C-terminal-like||Glutathione S-transferase (GST)||Glutathione S-transferase, N-terminal||Thioredoxin-like fold
AFLA_047140	391.7742858	164.2949983	1.2537	3.53E-06	0.00010376	-	HAD hydrolase, subfamily IA||HAD-like domain
AFLA_047180	667.0940611	1441.995959	-1.1121	8.21E-06	0.00022093	-	Protein kinase-like domain||Protein kinase domain||Serine/threonine-protein kinase, active site
AFLA_047190	1780.892346	3265.259791	-0.8746	0.00031815	0.0050995	-	L-lysine 6-monooxygenase/L-ornithine 5-monooxygenase||FAD/NAD(P)-binding domain
AFLA_048680	105.526688	210.8519115	-0.99862	0.00052588	0.0076664	-	Amino acid/polyamine transporter I
AFLA_048690	78937.12276	25377.34048	1.6372	4.53E-11	3.51E-09	-	Alcohol dehydrogenase, zinc-type, conserved site||Polyketide synthase, enoylreductase domain||Alcohol dehydrogenase, N-terminal||GroES-like||Alcohol dehydrogenase superfamily, zinc-type||Alcohol dehydrogenase, C-terminal||NAD(P)-binding domain
AFLA_048820	420.3595908	745.3396005	-0.82627	0.0011398	0.014514	-	WHIM1 domain
AFLA_049160	322.7875711	143.287853	1.1717	0.0013605	0.016741	-	FAD/NAD(P)-binding domain||Flavin monooxygenase-like
AFLA_049190	319.5092618	186.7341714	0.77487	0.0045332	0.043511	-	Berberine/berberine-like||FAD-binding, type 2||FAD linked oxidase, N-terminal
AFLA_049290	958.0161633	558.1593861	0.77937	0.002134	0.024123	-	Citrate synthase-like, large alpha subdomain||Citrate synthase||Citrate synthase active site
AFLA_049310	220.4515972	48.3920075	2.1876	1.24E-12	1.25E-10	-//-
AFLA_049340	1028.89632	118.9449003	3.1127	0.00032624	0.0051942	-	NADP-dependent oxidoreductase domain||Aldo/keto reductase/potassium channel subunit beta||Aldo/keto reductase
AFLA_049430	1614.968469	626.8665507	1.3653	0.00085041	0.011385	-//-
AFLA_049440	385.0245833	171.4646835	1.167	1.80E-05	0.00043845	-	Amino acid/polyamine transporter I
AFLA_049700	30.40216078	8.50244147	1.8382	0.00039271	0.0060492	-	FAD/NAD(P)-binding domain||FAD-binding domain
AFLA_049750	398.7076728	950.2856544	-1.253	0.00016053	0.0028664	-	Flavin monooxygenase-like||FAD/NAD(P)-binding domain
AFLA_049790	44.56124779	7.08929493	2.6521	5.63E-08	2.51E-06	-	Alpha/beta hydrolase fold-3||Alpha/Beta hydrolase fold
AFLA_050220	169.2239268	85.40561438	0.98653	0.0008032	0.010901	-	NAD(P)-binding domain||NmrA-like domain
AFLA_050300	478.0076542	174.4254803	1.4544	6.22E-08	2.75E-06	-	High mobility group box domain
AFLA_050350	681.7957219	383.7224462	0.82928	0.001983	0.022799	-//-
AFLA_050560	96.40159242	181.1821683	-0.91031	0.0016932	0.020175	-	Ribonuclease P, Rpp40
AFLA_050590	818.3849814	73.03174538	3.4862	2.99E-09	1.70E-07	-//-
AFLA_050600	995.5133293	399.2942892	1.318	1.83E-07	7.22E-06	-	Aldehyde dehydrogenase N-terminal domain||Aldehyde dehydrogenase domain||Aldehyde dehydrogenase, C-terminal||Aldehyde/histidinol dehydrogenase
AFLA_050870	209.6904555	394.7704028	-0.91275	0.00052336	0.0076384	-	HTH CenpB-type DNA-binding domain||Homeodomain-like
AFLA_051020	341.5223163	575.7674452	-0.75351	0.0034613	0.035669	-	Armadillo-type fold
AFLA_051250	3831.179216	2114.008975	0.85781	0.0037738	0.03808	-//-
AFLA_051680	335.1522331	1568.118111	-2.2261	8.04E-07	2.75E-05	-//-
AFLA_051700	1840.018081	793.7458363	1.213	1.24E-06	4.09E-05	-	P-loop containing nucleoside triphosphate hydrolase||DNA repair protein Rad50, eukaryotes
AFLA_051910	13.85166181	34.71786248	-1.3256	0.0046237	0.044082	-//-
AFLA_051920	185.6681259	384.9853553	-1.0521	8.45E-05	0.0016523	-	Major facilitator superfamily domain||Major facilitator superfamily
AFLA_052290	37.04063034	14.38419873	1.3646	0.0028669	0.030653	-	Zinc finger, CCCH-type
AFLA_052320	1185.774775	629.7594875	0.91296	0.0002697	0.0044492	-	Aspartic peptidase domain||Peptidase family A1 domain||Aspartic peptidase A1 family
AFLA_052400	702.5399072	1327.471769	-0.91803	0.00030617	0.004955	-	Isocitrate lyase||Pyruvate/Phosphoenolpyruvate kinase-like domain||Isocitrate lyase/phosphorylmutase, conserved site
AFLA_052460	7131.524694	4263.140324	0.74229	0.0024522	0.027191	-//-
AFLA_052640	1239.705911	2118.063936	-0.77275	0.0017775	0.020887	-	PH domain-like||Pleckstrin homology domain||Phosphatidylinositol 4,5-bisphosphate-binding protein Slm1/Slm2
AFLA_052650	855.9216731	1389.645016	-0.69917	0.0048227	0.045532	-//-
AFLA_052660	1756.994635	2936.449145	-0.74096	0.0023956	0.026633	-//-
AFLA_052750	218.4583056	79.43456054	1.4595	0.00082289	0.011109	-//-
AFLA_052860	16406.61236	4227.319418	1.9565	0.0010817	0.013857	-	Heat shock protein, 9/12, fungi||Heat shock protein 9/12
AFLA_052890	154.2667831	77.10395569	1.0006	0.00084633	0.011342	-	Proline-tRNA ligase, class II, C-terminal||Aminoacyl-tRNA synthetase, class II (G/ P/ S/T)||Anticodon-binding||Aminoacyl-tRNA synthetase, class II||Prolyl-tRNA synthetase, class II
AFLA_052930	80.57824709	27.52120127	1.5498	8.44E-05	0.0016519	-	FAD-dependent oxidoreductase 2, FAD binding domain||Uncharacterised conserved protein UCP036654||FAD/NAD(P)-binding domain
AFLA_052960	592.1161736	267.049361	1.1488	1.08E-05	0.00028271	-	Glycosyl transferase, family 8||Nucleotide-diphospho-sugar transferases
AFLA_053090	390.6647816	219.9834716	0.82854	0.0014866	0.018135	-	Protein of unknown function DUF3433
AFLA_053100	399.5091711	165.14094	1.2745	4.21E-06	0.00012152	-//-
AFLA_053120	9.139685486	0.676472221	3.756	0.0013093	0.016252	-//-
AFLA_053210	49.02803287	7.314196433	2.7448	1.64E-08	8.02E-07	-	Aldehyde dehydrogenase domain||Aldehyde dehydrogenase N-terminal domain||Aldehyde dehydrogenase, C-terminal||Aldehyde/histidinol dehydrogenase
AFLA_053220	118.9612316	254.5800904	-1.0976	0.00058441	0.0083333	-	Basic-leucine zipper domain||Protein of unknown function DUF3425
AFLA_053230	129.283112	70.24740701	0.88002	0.0037903	0.038211	-	Zn(2)-C6 fungal-type DNA-binding domain
AFLA_053240	36.56606467	13.69218671	1.4172	0.0021508	0.02427	-	Alpha/beta hydrolase fold-1||Alpha/Beta hydrolase fold
AFLA_053250	1120.800295	555.7276696	1.0121	6.69E-05	0.0013521	-//-
AFLA_053360	76.13723887	19.60752546	1.9572	3.10E-07	1.17E-05	-	Heterokaryon incompatibility
AFLA_053430	10.95272264	1.691806023	2.6947	0.0034303	0.035505	-	3-hydroxyacyl-CoA dehydrogenase, conserved site||NAD(P)-binding domain||3-hydroxyacyl-CoA dehydrogenase, NAD binding||3-hydroxyacyl-CoA dehydrogenase
AFLA_053470	26.96392272	5.595769803	2.2686	8.34E-05	0.0016355	-	P-type ATPase, cytoplasmic domain N||HAD-like domain||P-type ATPase, A domain||P-type ATPase, phosphorylation site||Heavy metal-associated domain, HMA||P-type ATPase||P-type ATPase, subfamily IB||Heavy-metal-associated, conserved site||Heavy metal-associated domain, copper ion-binding
AFLA_053540	50.63729741	289.5954279	-2.5158	1.52E-09	9.26E-08	-	FAD-binding domain||FAD/NAD(P)-binding domain
AFLA_053550	79.59863498	20.10125658	1.9855	4.18E-07	1.52E-05	-	Protein of unknown function DUF3425
AFLA_053680	33.28041412	2.230199446	3.8994	0.003646	0.037113	-//-
AFLA_053700	116.8428358	591.4076134	-2.3396	1.42E-06	4.60E-05	-//-
AFLA_053840	1646.140909	324.8178452	2.3414	1.18E-13	1.37E-11	-//-
AFLA_053940	7.067982983	0.304029147	4.539	0.0028975	0.03087	-	Multicopper oxidase, type 2||Cupredoxin
AFLA_053980	74.48893542	14.57319454	2.3537	0.00026413	0.0043742	-	Glutathione-dependent formaldehyde-activating enzyme/centromere protein V||Mss4-like
AFLA_054010	606.8924622	1031.508562	-0.76524	0.0021959	0.024692	-	Major facilitator superfamily domain
AFLA_054020	1809.641982	1086.111105	0.73653	0.0029977	0.031792	-	Alpha/Beta hydrolase fold||Lipase EstA/Esterase EstB
AFLA_054060	80.06463255	39.46245311	1.0207	0.0032396	0.033894	-	P-loop containing nucleoside triphosphate hydrolase
AFLA_054240	95.94530583	44.2679683	1.1159	0.00086519	0.011534	-//-
AFLA_054370	9.172628527	1.066956984	3.1038	0.0031367	0.033033	-	Short-chain dehydrogenase/reductase, conserved site||NAD(P)-binding domain||Short-chain dehydrogenase/reductase SDR
AFLA_054470	231.6092638	95.11706187	1.2839	6.57E-05	0.0013287	-	Chitinase II||LysM domain||Glycoside hydrolase superfamily||Chitinase insertion domain||Glycoside hydrolase, catalytic domain||Glycoside hydrolase family 18, catalytic domain||Chitin-binding, type 1
AFLA_054500	845.0978818	452.7246421	0.90048	0.00040731	0.0062365	-	Peptidase S12, Pab87-related, C-terminal||Beta-lactamase-related||Beta-lactamase/transpeptidase-like
AFLA_055020	583.2826494	963.1806754	-0.72361	0.0040029	0.039519	-	Ankyrin repeat||Ankyrin repeat-containing domain
AFLA_055540	698.1676715	1136.161251	-0.70252	0.0043122	0.041791	-	UbiB domain||Protein kinase-like domain
AFLA_055550	278.381383	1109.700542	-1.995	3.29E-09	1.87E-07	-	Urease accessory protein UreF
AFLA_055710	12.21066259	1.961002735	2.6385	0.0026562	0.029	-//-
AFLA_056160	1227.62421	2047.806199	-0.73821	0.0030231	0.031968	-//-
AFLA_056170	3452.327828	602.0815762	2.5195	6.51E-09	3.51E-07	-	Class I glutamine amidotransferase-like||Catalase, mono-functional, haem-containing, clade 2||Catalase haem-binding site||Catalase-like domain||Catalase immune-responsive domain||Catalase core domain||Catalase active site||Catalase, mono-functional, haem-containing
AFLA_056280	112.6228645	29.91039018	1.9128	0.0020112	0.023043	-//-
AFLA_056430	42.92757131	15.60031532	1.4603	0.00095213	0.012511	-	Major facilitator superfamily||Major facilitator superfamily domain
AFLA_056440	8496.632502	1863.284081	2.189	3.09E-18	6.17E-16	-	Tetratricopeptide-like helical domain
AFLA_056650	68.82767976	12.94730056	2.4103	5.95E-09	3.25E-07	-	Ferric reductase, NAD binding domain||Riboflavin synthase-like beta-barrel||FAD-binding 8
AFLA_056830	525.1878823	1131.775538	-1.1077	0.00024907	0.0041571	-	Ribonuclease III domain
AFLA_057120	23.53546965	6.880300317	1.7743	0.0030082	0.031864	-	FAD/NAD(P)-binding domain
AFLA_057150	70.99321286	3.348779611	4.406	8.49E-12	7.44E-10	-	Cyanovirin-N
AFLA_057290	92.84753707	29.96360338	1.6317	2.30E-06	7.02E-05	-	Protein kinase-like domain
AFLA_057550	10.79901929	1.30132126	3.0529	0.0018086	0.021156	-	Major facilitator superfamily||Major facilitator superfamily domain
AFLA_057580	100.7598004	27.96205827	1.8494	1.25E-07	5.15E-06	-	Ribonuclease H-like domain||Ribonuclease H domain
AFLA_057590	373.1140502	194.2530811	0.94168	0.00048272	0.007143	-//-
AFLA_057600	314.5663796	99.75480298	1.6569	0.0041602	0.040633	-	Alpha crystallin/Hsp20 domain||HSP20-like chaperone||Small heat shock protein HSP20
AFLA_057690	17.9438447	3.633516124	2.3041	0.00081524	0.011041	-	GDSL lipase/esterase||SGNH hydrolase-type esterase domain
AFLA_057770	192.4370027	72.08785586	1.4166	0.0012469	0.015617	-	Pectate lyase/Amb allergen||Pectin lyase fold/virulence factor||Pectin lyase fold
AFLA_057790	308.1992097	41.32322814	2.8988	1.45E-12	1.41E-10	-	Alpha/Beta hydrolase fold||Carboxylesterase, type B||Carboxylesterase type B, conserved site||Carboxylesterase type B, active site
AFLA_057840	31.51120234	8.053005552	1.9683	0.00012331	0.0023082	-	Major facilitator superfamily||Major facilitator superfamily domain
AFLA_057880	34.05752601	12.11916685	1.4907	0.0018725	0.021764	-	AAA+ ATPase domain||Zinc finger, Rad18-type putative||ATPase, AAA-type, core||AAA ATPase, C-terminal domain||DNA polymerase III, clamp loader complex, gamma/delta/delta subunit, C-terminal||P-loop containing nucleoside triphosphate hydrolase||MgsA AAA+ ATPase C-terminal
AFLA_057890	35.59239188	12.57485749	1.501	0.0016119	0.019405	-	FAD-binding, type 2, subdomain 1||FAD-binding, type 2||CO dehydrogenase flavoprotein-like, FAD-binding, subdomain 2||FAD linked oxidase, N-terminal||Oxygen oxidoreductase covalent FAD-binding site
AFLA_057900	143.1064322	20.99280045	2.7691	2.59E-05	0.00060162	-	Thioredoxin-like fold||Glutathione S-transferase, C-terminal-like||Glutathione S-transferase, N-terminal
AFLA_057920	239.1130127	109.6087368	1.1253	0.0039988	0.039519	-	Ankyrin repeat-containing domain||Ankyrin repeat
AFLA_057940	182.3886267	80.87680156	1.1732	6.38E-05	0.0012965	-	NmrA-like domain||NAD(P)-binding domain
AFLA_057960	49.14026209	3.616725379	3.7641	2.27E-06	6.93E-05	-	Intradiol ring-cleavage dioxygenase, core
AFLA_058070	270.2985207	155.2584447	0.79988	0.0035317	0.036123	-	Polyketide synthase, enoylreductase domain||GroES-like||Alcohol dehydrogenase, N-terminal||Alcohol dehydrogenase superfamily, zinc-type||Alcohol dehydrogenase, C-terminal||NAD(P)-binding domain
AFLA_058140	148.2592668	329.0144462	-1.15	0.0013205	0.016327	-//-
AFLA_058160	54.1999849	750.0527541	-3.7906	2.48E-05	0.00057869	-	1-aminocyclopropane-1-carboxylate deaminase/D-cysteine desulfhydrase||Tryptophan synthase beta subunit-like PLP-dependent enzyme||1-aminocyclopropane-1-carboxylate deaminase
AFLA_058180	25.12161314	5.712598859	2.1367	0.00032065	0.0051244	-	NAD(P)-binding domain||Short-chain dehydrogenase/reductase SDR
AFLA_058210	31.52951842	7.453526175	2.0807	8.74E-05	0.0016975	-	Thiamin diphosphate-binding fold||Thiamine pyrophosphate enzyme, C-terminal TPP-binding||DHS-like NAD/FAD-binding domain||Thiamine pyrophosphate enzyme, N-terminal TPP-binding domain||Thiamine pyrophosphate enzyme, central domain||TPP-binding enzyme, conserved site
AFLA_058220	10.1425937	0.304029147	5.0601	0.00015673	0.0028263	-	Alcohol dehydrogenase superfamily, zinc-type||Alcohol dehydrogenase, N-terminal||GroES-like
AFLA_058270	201.8780446	91.65339861	1.1392	0.0027798	0.03	-	Heterokaryon incompatibility
AFLA_058280	41.16575627	5.406067824	2.9288	3.60E-08	1.65E-06	-	ATP adenylyltransferase, C-terminal||HIT-like domain
AFLA_058290	30.0056089	6.461944003	2.2152	3.91E-05	0.00085253	-//-
AFLA_058380	33.40356268	8.871676491	1.9127	0.00075372	0.010362	-//-
AFLA_058940	71.03480654	185.9124864	-1.388	3.44E-06	0.00010163	-	Protein phosphatase 2C family||PPM-type phosphatase domain
AFLA_059130	356.2128799	23.18334137	3.9416	2.76E-07	1.05E-05	-	Amidohydrolase-related||Metal-dependent hydrolase
AFLA_059140	38.57916682	2.638725899	3.8699	2.56E-10	1.80E-08	-	Cytochrome P450||Cytochrome P450, E-class, group I||Cytochrome P450, conserved site
AFLA_059390	2702.989175	1540.623173	0.81104	0.00096796	0.012641	-//-
AFLA_059460	302.1286682	13.64056353	4.4692	7.35E-05	0.0014623	-//-
AFLA_059580	541.1847956	308.1805909	0.81235	0.0017267	0.020403	-	Heterokaryon incompatibility
AFLA_059640	124.0463897	56.71241404	1.1291	0.00032325	0.0051595	-	Fungal transcription factor
AFLA_059690	57.73345548	7.52444199	2.9398	9.09E-05	0.0017585	-	AhpD-like||Carboxymuconolactone decarboxylase-like
AFLA_059740	55.12603218	25.97443493	1.0856	0.0039958	0.039519	-	FAD/NAD(P)-binding domain
AFLA_059790	136.0910917	57.75937222	1.2364	7.02E-05	0.0014048	-	Alcohol dehydrogenase, N-terminal||GroES-like||Alcohol dehydrogenase, zinc-type, conserved site||NAD(P)-binding domain||Alcohol dehydrogenase class III/S-(hydroxymethyl)glutathione dehydrogenase||Alcohol dehydrogenase superfamily, zinc-type||Alcohol dehydrogenase, C-terminal
AFLA_059810	85.57941508	24.70473805	1.7925	7.37E-07	2.53E-05	-//-
AFLA_059940	45.43247635	11.95571839	1.926	1.00E-04	0.0019133	-	Aflatoxin regulatory protein
AFLA_059950	603.0544529	179.0740287	1.7517	7.04E-09	3.75E-07	-	FAD-binding, type 2, subdomain 1||Berberine/berberine-like||FAD-binding, type 2||CO dehydrogenase flavoprotein-like, FAD-binding, subdomain 2||FAD linked oxidase, N-terminal
AFLA_059960	120.1787948	45.78362703	1.3923	3.06E-05	0.0006871	-	Zn(2)-C6 fungal-type DNA-binding domain
AFLA_059970	11381.77959	5404.936031	1.0744	8.46E-06	0.00022676	-	NAD(P)-binding domain||Short-chain dehydrogenase/reductase SDR
AFLA_059980	270.5131941	37.1779392	2.8632	2.01E-20	4.76E-18	-	Glucose-methanol-choline oxidoreductase, C-terminal||Glucose-methanol-choline oxidoreductase, N-terminal||FAD/NAD(P)-binding domain
AFLA_060000	33.04612372	10.32499832	1.6783	0.004006	0.039519	-	Metallo-beta-lactamase
AFLA_060030	33045.13957	18157.73981	0.86385	0.00034005	0.0053607	-//-
AFLA_060070	414.8289174	209.4473602	0.98593	0.00019058	0.0033196	-//-
AFLA_060100	988.4334051	481.7033111	1.037	0.0045769	0.043766	-//-
AFLA_060130	84.40096484	26.03768369	1.6967	0.0047736	0.045208	-	WD40 repeat||P-loop containing nucleoside triphosphate hydrolase||WD40 repeat, conserved site||WD40/YVTN repeat-like-containing domain||NACHT nucleoside triphosphatase||NWD NACHT-NTPase, N-terminal||WD40-repeat-containing domain
AFLA_060260	661.2598196	183.7748033	1.8473	5.73E-12	5.20E-10	-	Small heat shock protein HSP20||HSP20-like chaperone||Alpha crystallin/Hsp20 domain
AFLA_060300	9739.775237	41332.37402	-2.0853	0.0011767	0.014925	-	Acetohydroxy acid isomeroreductase, NADPH-binding domain||Ketol-acid reductoisomerase||6-phosphogluconate dehydrogenase, domain 2||Ketol-acid reductoisomerase, fungi||6-phosphogluconate dehydrogenase C-terminal domain-like||NAD(P)-binding domain||Acetohydroxy acid isomeroreductase C-terminal
AFLA_060320	71.68504375	31.46088134	1.1881	0.00077355	0.010555	-	Membrane attack complex component/perforin (MACPF) domain
AFLA_060340	194.0282558	386.4336173	-0.99395	0.00023645	0.0039777	-	Zinc finger, RING-type||Zinc finger, RING/FYVE/PHD-type
AFLA_060410	34.94332603	8.754847435	1.9969	7.55E-05	0.001498	-	Short-chain dehydrogenase/reductase SDR||NAD(P)-binding domain||Short-chain dehydrogenase/reductase, conserved site
AFLA_060510	52.37230228	18.5021609	1.5011	0.00021368	0.0036522	-//-
AFLA_060520	76.54591845	38.1109373	1.0061	0.0036969	0.037452	-	Heterokaryon incompatibility
AFLA_060640	773.2614859	382.673898	1.0148	7.57E-05	0.0014997	-	P-loop containing nucleoside triphosphate hydrolase||Ankyrin repeat||NACHT nucleoside triphosphatase||Ankyrin repeat-containing domain
AFLA_060810	33.19254134	12.70918345	1.385	0.0050663	0.047108	-//-
AFLA_060850	102.7692689	51.36083837	1.0007	0.0022545	0.025262	-	ABC transporter type 1, transmembrane domain||AAA+ ATPase domain||ABC transporter-like||P-loop containing nucleoside triphosphate hydrolase
AFLA_060920	405.4875444	223.8447582	0.85716	0.0012171	0.015375	-//-
AFLA_060930	2639.231757	1657.432224	0.67117	0.0054518	0.049751	-//-
AFLA_061020	50.01381486	15.45490855	1.6943	6.73E-05	0.0013567	-	Protein of unknown function DUF1446||CoA-transferase family III||CoA-transferase family III domain||Protein of unknown function DUF4387
AFLA_061030	21.77369162	5.51056513	1.9823	0.0012472	0.015617	-	Amidase||Amidase signature domain
AFLA_061070	169.5960112	619.402011	-1.8688	0.00082205	0.011109	-	Hydroxymethylglutaryl-CoA reductase, class I/II, substrate-binding domain||Hydroxymethylglutaryl-CoA reductase, class I/II, catalytic domain||Hydroxymethylglutaryl-CoA reductase, class I/II, NAD/NADP-binding domain||Hydroxymethylglutaryl-CoA reductase, class I/II||Hydroxymethylglutaryl-CoA reductase, class I/II, conserved site
AFLA_061090	257.283687	131.7124738	0.96597	0.00056782	0.0081385	-	Serine/threonine-protein kinase, active site||Protein kinase-like domain||Protein kinase domain||Mitogen-activated protein (MAP) kinase, conserved site
AFLA_061110	349.027302	953.2154347	-1.4495	0.00063181	0.0088864	-	Fungal lipase-like domain||Alpha/Beta hydrolase fold||Mono-/di-acylglycerol lipase, N-terminal
AFLA_061120	121.6073707	54.42756105	1.1598	0.00025267	0.0042118	-	Major facilitator superfamily domain||Major facilitator superfamily
AFLA_061300	27.65329135	9.118711592	1.6005	0.0019274	0.022289	-//-
AFLA_061380	201.5671338	84.86330674	1.248	2.12E-05	0.00050644	-	Acid ceramidase, N-terminal
AFLA_061410	517.949612	246.0853159	1.0737	3.77E-05	0.00082585	-	S-adenosyl-L-methionine-dependent methyltransferase
AFLA_061700	32.93382049	66.70999867	-1.0183	0.0052095	0.048089	-//-
AFLA_061760	632.8595627	355.1468981	0.83347	0.0010668	0.013735	-	Protein of unknown function DUF2841
AFLA_061880	3114.855865	4948.92096	-0.66795	0.0049865	0.046535	-	PdxS/SNZ N-terminal domain||Aldolase-type TIM barrel||Ribulose-phosphate binding barrel||Pyridoxal 5'-phosphate synthase subunit PdxS/SNZ
AFLA_061970	160.5222303	280.4873297	-0.80516	0.0034678	0.035669	-//-
AFLA_062170	1376.653009	601.4733051	1.1946	0.0052695	0.048468	-	YjeF N-terminal domain-containing protein, eukaryotes||YjeF N-terminal domain
AFLA_062560	32.49950209	9.570649398	1.7637	0.0004014	0.0061682	-	Gamma interferon inducible lysosomal thiol reductase GILT
AFLA_062610	478.8505967	171.5375167	1.4811	2.14E-08	1.02E-06	-	CinA, C-terminal
AFLA_062700	285.112778	1322.815174	-2.214	0.00087309	0.011603	-	Mitochondrial substrate/solute carrier||Mitochondrial carrier protein||Mitochondrial carrier domain
AFLA_062750	110.9254966	57.86261859	0.93889	0.0033244	0.034611	-//-
AFLA_062770	12.80848782	0.980501367	3.7074	0.00014952	0.0027269	-	Polyketide synthase, enoylreductase domain||Alcohol dehydrogenase, N-terminal||GroES-like||NAD(P)-binding domain||Alcohol dehydrogenase superfamily, zinc-type||Alcohol dehydrogenase, C-terminal
AFLA_062800	1216.465646	685.4152234	0.82765	0.00076813	0.010503	-	NADP-dependent oxidoreductase domain||Aldo/keto reductase/potassium channel subunit beta
AFLA_062870	24.86659991	1.015333803	4.6142	8.19E-09	4.28E-07	-//-
AFLA_062890	2097.1431	33.40097341	5.9724	2.64E-47	2.11E-44	-//-
AFLA_062920	827.1772777	467.8493174	0.82215	0.00090487	0.011964	-	Mss4-like||Glutathione-dependent formaldehyde-activating enzyme/centromere protein V
AFLA_063020	27.10913199	5.361405527	2.3381	4.44E-05	0.00094048	-	Multi antimicrobial extrusion protein
AFLA_063150	33.76591762	13.47336223	1.3255	0.0049292	0.046247	-//-
AFLA_063210	279.3916595	476.1285268	-0.76906	0.0034638	0.035669	-	Amino acid/polyamine transporter I||Amino acid permease/ SLC12A domain||Amino acid permease, conserved site
AFLA_063420	872.7450587	467.6938909	0.9	0.002096	0.023778	-	Transferase||Chloramphenicol acetyltransferase-like domain
AFLA_063440	387.5722334	58.23594552	2.7345	8.61E-21	2.12E-18	-	Beta-lactamase-related||Beta-lactamase/transpeptidase-like
AFLA_063700	184.938483	73.71960947	1.3269	4.00E-05	0.00086597	-//-
AFLA_064490	38.40716589	7.603936722	2.3366	4.40E-06	0.00012617	-//-
AFLA_064610	68.22001403	25.89906012	1.3973	0.00018466	0.003234	-	Short-chain dehydrogenase/reductase SDR||NAD(P)-binding domain||Short-chain dehydrogenase/reductase, conserved site
AFLA_064640	140.3894824	62.82709523	1.16	0.00012575	0.0023402	-	Short-chain dehydrogenase/reductase SDR||Short-chain dehydrogenase/reductase, conserved site||NAD(P)-binding domain
AFLA_064720	36.4903936	13.45782243	1.4391	0.0019323	0.022317	-	Major facilitator superfamily domain||Major facilitator, sugar transporter-like||Sugar/inositol transporter
AFLA_064810	2887.766498	1524.96645	0.92118	0.00016271	0.0028933	-	Kre9/Knh1 family
AFLA_064860	124.1781989	434.1293524	-1.8057	0.0005686	0.0081406	-	Peptidase S8, subtilisin, Asp-active site||Phospholipase C/P1 nuclease domain||S1/P1 nuclease
AFLA_064920	17.54243234	4.502192212	1.9621	0.0023548	0.026271	-	Glycoside hydrolase, catalytic domain||X8 domain||Glycoside hydrolase superfamily||Glucanosyltransferase
AFLA_064930	31.83575377	6.999086481	2.1854	3.33E-05	0.00073915	-	FAD/NAD(P)-binding domain||Flavin monooxygenase-like
AFLA_064970	8389.775892	2865.813042	1.5497	4.16E-05	0.0008942	-	TspO/MBR-related protein
AFLA_065070	134.5501115	62.02774494	1.1172	0.00031619	0.0050914	-	F-box domain
AFLA_065420	346.5772797	116.5801412	1.5719	9.21E-09	4.77E-07	-//-
AFLA_065480	177.3873662	72.35311035	1.2938	1.63E-05	0.0004041	-	Transcription factor domain, fungi
AFLA_065550	63.30797271	3.513479016	4.1714	2.46E-11	1.98E-09	-	Major facilitator superfamily||Major facilitator superfamily domain
AFLA_065560	26.1830847	1.266488824	4.3697	1.10E-08	5.61E-07	-//-
AFLA_065570	108.7609968	7.962797103	3.7717	8.68E-08	3.67E-06	-	O-methyltransferase, family 2||S-adenosyl-L-methionine-dependent methyltransferase||Winged helix-turn-helix DNA-binding domain||O-methyltransferase COMT-type
AFLA_065610	28.17060355	73.82734284	-1.39	0.00016111	0.0028688	-	TauD/TfdA-like domain
AFLA_065620	25.32534875	1040.636748	-5.3607	0.00016099	0.0028688	-	Major facilitator superfamily domain||Major facilitator superfamily
AFLA_065640	71.07253604	159.7057894	-1.1681	0.0015136	0.018395	-	Major facilitator, sugar transporter-like||Sugar/inositol transporter||Major facilitator superfamily domain
AFLA_065750	27.81310908	9.467403035	1.5547	0.0029131	0.031011	-	Cytochrome P450, E-class, group IV||Cytochrome P450
AFLA_065860	17.52048265	66.21360427	-1.9181	1.39E-06	4.50E-05	-	Alpha/Beta hydrolase fold||RTA-like protein
AFLA_065960	6498.782106	19179.50185	-1.5613	3.58E-10	2.42E-08	-	Fucose-specific lectin
AFLA_066100	245.6097315	115.2284594	1.0919	0.0002789	0.0045832	-	NAD(P)-binding domain
AFLA_066150	96.58570254	17.81122213	2.439	0.00052146	0.0076193	-	Glycoside hydrolase family 10 domain||Glycoside hydrolase superfamily||Glycoside hydrolase, catalytic domain
AFLA_066300	2368.654661	645.0857165	1.8765	0.00018873	0.0032918	-	Glycoside hydrolase, family 61
AFLA_066400	33.45849242	4.512022073	2.8905	3.93E-07	1.44E-05	-	FAD dependent oxidoreductase||FAD/NAD(P)-binding domain
AFLA_066410	77.36581388	9.277701056	3.0599	1.05E-12	1.07E-10	-	ATP-grasp fold||ATP-grasp fold, subdomain 2
AFLA_066420	422.0149124	76.91211891	2.456	1.55E-17	2.79E-15	-	Major facilitator superfamily domain||Proton-dependent oligopeptide transporter family
AFLA_066430	1025.538407	496.2946385	1.0471	3.08E-05	0.00068986	-	Saccharopine dehydrogenase, NADP binding domain||Saccharopine dehydrogenase, C-terminal||NAD(P)-binding domain
AFLA_066440	201.5573943	60.21089803	1.7431	7.73E-09	4.05E-07	-	FAD linked oxidase, N-terminal||S-adenosyl-L-methionine-dependent methyltransferase||FAD-binding, type 2||Higher eukaryotic phosphomevalonate kinase||FAD-binding, type 2, subdomain 1
AFLA_066450	33.33156223	7.619476524	2.1291	5.68E-05	0.0011734	-	GTP cyclohydrolase I, conserved site||GTP cyclohydrolase I||GTP cyclohydrolase I domain
AFLA_066510	95.81599593	35.9332729	1.4149	4.38E-05	0.00093263	-	FAD linked oxidase, N-terminal||FAD-binding, type 2||CO dehydrogenase flavoprotein-like, FAD-binding, subdomain 2||Berberine/berberine-like||FAD-binding, type 2, subdomain 1
AFLA_066520	80.04270136	22.13317513	1.8546	5.36E-07	1.90E-05	-//-
AFLA_066760	11.42248334	1.640182842	2.7999	0.0021827	0.024565	-	Chitobiase/beta-hexosaminidase domain 2-like||Glycosyl hydrolase family 115
AFLA_066890	339.6311174	102.8166716	1.7239	4.04E-10	2.70E-08	-	Cytochrome P450
AFLA_066900	167.3643985	50.63002367	1.7249	1.23E-05	0.00031493	-	Zn(2)-C6 fungal-type DNA-binding domain||Transcription factor domain, fungi
AFLA_066920	42.35413952	13.30420383	1.6706	0.00021945	0.003731	-	Polyketide synthase, enoylreductase domain||GroES-like||NAD(P)-binding domain||Alcohol dehydrogenase superfamily, zinc-type
AFLA_066930	61.26796788	21.65052481	1.5007	0.00013811	0.0025407	-	Cytochrome P450||Cytochrome P450, E-class, group II||Cytochrome P450, conserved site||Cytochrome P450, E-class, CYP52
AFLA_066950	29.08571299	247.6333215	-3.0898	5.49E-06	0.0001539	-	FAD/NAD(P)-binding domain
AFLA_066970	5828.833717	10711.75423	-0.87792	0.00031121	0.0050174	-	Endonuclease/exonuclease/phosphatase
AFLA_066980	1620.014924	3519.835079	-1.1195	6.76E-06	0.00018615	-	Polyketide synthase, phosphopantetheine-binding domain||Thiolase-like||Polyketide synthase, acyl transferase domain||Beta-ketoacyl synthase, C-terminal||Malonyl-CoA ACP transacylase, ACP-binding||NAD(P)-binding domain||Polyketide synthase, ketoreductase domain||S-adenosyl-L-methionine-dependent methyltransferase||Beta-ketoacyl synthase, N-terminal||Beta-ketoacyl synthase, active site||Methyltrans…
AFLA_067010	792.660035	1393.79349	-0.81424	0.0012352	0.015543	-	Acyltransferase ChoActase/COT/CPT
AFLA_067210	47.49928138	17.12742194	1.4716	0.00042125	0.0064074	-//-
AFLA_067240	224.0937374	107.750286	1.0564	0.0001735	0.0030554	-//-
AFLA_067390	534.392365	892.3274055	-0.73967	0.003119	0.032901	-	Protein of unknown function DUF4598
AFLA_067620	171.3199303	348.6730175	-1.0252	0.00015564	0.0028154	-	Glutamine amidotransferase type 2 domain||Putative glutamine amidotransferase type 2||Nucleophile aminohydrolases, N-terminal
AFLA_067820	467.1584931	281.6193149	0.73017	0.0051929	0.047986	-	Domain of unknown function DUF4211
AFLA_067910	237.050792	408.6493175	-0.78567	0.0033724	0.035025	-	Myc-type, basic helix-loop-helix (bHLH) domain
AFLA_068050	68.51775529	29.69406759	1.2063	0.001115	0.014255	-//-
AFLA_068080	126.5049516	15.90272643	2.9918	5.83E-12	5.25E-10	-	Superoxide dismutase, copper/zinc binding domain||Superoxide dismutase (Cu/Zn) / superoxide dismutase copper chaperone
AFLA_068120	123.1959765	27.86577279	2.1444	2.90E-10	2.00E-08	-	Inositol monophosphatase, metal-binding site||Inositol monophosphatase||Inositol monophosphatase, conserved site
AFLA_068300	12304.32633	6566.002736	0.90608	0.00021034	0.0036	-	Glycoside hydrolase superfamily||Glycoside hydrolase family 17||Glycoside hydrolase, catalytic domain
AFLA_068810	431.1744909	729.4874077	-0.75861	0.0028699	0.030653	-	HotDog domain||Thioesterase domain
AFLA_068840	1567.140717	3153.660464	-1.0089	0.00013379	0.0024682	-	Glycine cleavage T-protein, C-terminal barrel domain||Glycine cleavage system T protein||Glycine cleavage T-protein-like, N-terminal||Glycine cleavage T-protein/YgfZ, C-terminal domain||GTP-binding protein TrmE/Glycine cleavage system T protein, domain 1||Aminomethyltransferase/Dimethylsulfonioproprionate demethylase DmdA
AFLA_069210	600.7472801	167.7239788	1.8407	7.03E-12	6.24E-10	-	DNA polymerase family X, beta-like||DNA polymerase family X lyase domain||DNA polymerase beta-like, N-terminal domain||DNA polymerase lambda, fingers domain||DNA polymerase beta, palm domain||DNA-directed DNA polymerase X||DNA polymerase family X, binding site||DNA polymerase beta, thumb domain||DNA polymerase family X
AFLA_069300	2430.098012	809.241638	1.5864	2.82E-10	1.96E-08	-	DNA recombination/repair protein Rad51||P-loop containing nucleoside triphosphate hydrolase||DNA recombination and repair protein, RecA-like||DNA repair Rad51/transcription factor NusA, alpha-helical||DNA recombination and repair protein RecA, monomer-monomer interface||AAA+ ATPase domain||DNA recombination and repair protein Rad51, C-terminal||DNA recombination and repair protein RecA-like, ATP-…
AFLA_069320	8455.692186	5268.658605	0.68249	0.004949	0.046387	-	ABC transporter type 1, transmembrane domain||AAA+ ATPase domain||ABC transporter, conserved site||ABC transporter-like||P-loop containing nucleoside triphosphate hydrolase
AFLA_069370	32757.4908	15312.6777	1.0971	9.08E-06	0.00024244	-	Phosphoglycerate kinase, N-terminal||Phosphoglycerate kinase, C-terminal||Phosphoglycerate kinase||Phosphoglycerate kinase, conserved site
AFLA_070070	643.4318918	329.0979932	0.96727	0.00015052	0.0027414	-	Ribosomal protein L2 domain 2||Translation protein SH3-like domain
AFLA_070250	2124.139939	654.057254	1.6994	1.34E-11	1.11E-09	-	Alpha/Beta hydrolase fold||Alpha/beta hydrolase fold-1
AFLA_070360	102.8912461	40.21609586	1.3553	0.00018075	0.0031733	-//-
AFLA_070400	203.7599012	8.77985001	4.5365	3.26E-11	2.56E-09	-	P-loop containing nucleoside triphosphate hydrolase||ATPase, AAA-type, core||AAA+ ATPase domain
AFLA_070410	109.7542581	47.21822901	1.2169	0.00020839	0.0035806	-//-
AFLA_070420	921.9244252	369.9240718	1.3174	2.14E-07	8.30E-06	-	Major facilitator superfamily domain||Major facilitator superfamily
AFLA_070470	3069.898062	802.3095631	1.936	0.0013145	0.016276	-//-
AFLA_070490	478.6847201	7.471567865	6.0015	5.42E-58	6.93E-55	-//-
AFLA_070590	67.70270183	31.98981199	1.0816	0.0027901	0.030077	-	Threonyl/alanyl tRNA synthetase, class II-like, putative editing domain||Threonyl/alanyl tRNA synthetase, SAD||Translation protein, beta-barrel domain||Alanyl-tRNA synthetase, class IIc, core domain||Alanyl-tRNA synthetase, class IIc, N-terminal
AFLA_070620	34.82373707	9.621021635	1.8558	0.00016423	0.0029163	-	Fungal transcription factor||Zn(2)-C6 fungal-type DNA-binding domain
AFLA_070660	280.7386151	131.3273365	1.0961	0.0011346	0.014462	-	CO dehydrogenase flavoprotein-like, FAD-binding, subdomain 2||FAD-binding, type 2||FAD-binding, type 2, subdomain 1||FAD linked oxidase, N-terminal
AFLA_070810	201.9077696	59.87203645	1.7537	2.87E-05	0.000654	-	Carboxylesterase type B, active site||Carboxylesterase type B, conserved site||Carboxylesterase, type B||Alpha/Beta hydrolase fold
AFLA_070830	1922.637364	546.4424069	1.8149	9.20E-13	9.48E-11	-	Ankyrin repeat||Ankyrin repeat-containing domain
AFLA_070850	329.4706972	25.18454741	3.7095	6.63E-08	2.91E-06	-	Phosphatidylserine decarboxylase||Phophatidylserine decarboxylase||Phosphatidylserine decarboxylase-related
AFLA_071090	536.1666864	2273.760034	-2.0843	0.00026033	0.0043226	-	Immunoglobulin E-set
AFLA_071230	3460.353846	2105.453691	0.71679	0.0048492	0.045687	-	Pyridine nucleotide-disulphide oxidoreductase, dimerisation domain||FAD/NAD-linked reductase, dimerisation domain||Rieske [2Fe-2S] iron-sulphur domain||Reductase, C-terminal||FAD/NAD(P)-binding domain
AFLA_071570	1205.520878	489.3724395	1.3007	0.0052224	0.048121	-	Malic enzyme, conserved site||Malic enzyme, NAD-binding||Malic enzyme, N-terminal domain||Malic oxidoreductase||NAD(P)-binding domain
AFLA_072350	83.67959396	5.394987019	3.9552	0.00027998	0.0045951	-	Cerato-platanin
AFLA_072380	686.4487008	116.280066	2.5615	2.10E-20	4.80E-18	-	NAD(P)-binding domain
AFLA_072560	151.5399644	52.19827347	1.5376	1.05E-06	3.49E-05	-	Hydantoinase/oxoprolinase||Hydantoinaseoxoprolinase, N-terminal||Hydantoinase B/oxoprolinase
AFLA_072570	1742.46526	763.6605497	1.1901	1.84E-06	5.77E-05	-//-
AFLA_072680	14598.80846	5436.449023	1.4251	6.70E-07	2.31E-05	-//-
AFLA_072840	77.05340865	37.95481681	1.0216	0.0034675	0.035669	-	Aconitase/3-isopropylmalate dehydratase large subunit, alpha/beta/alpha, subdomain 2||Aconitase/3-isopropylmalate dehydratase, swivel||Aconitase A/isopropylmalate dehydratase small subunit, swivel domain||Aconitase/3-isopropylmalate dehydratase large subunit, alpha/beta/alpha domain||Aconitase/3-isopropylmalate dehydratase large subunit, alpha/beta/alpha, subdomain 1/3||Aconitase/isopropylmalate …
AFLA_073010	303.4532955	148.4392467	1.0316	0.00030184	0.0049034	-	Protein of unknown function DUF3431
AFLA_073030	2006.196052	1083.03785	0.88938	0.00035195	0.0055211	-	Amino acid/polyamine transporter I
AFLA_073040	68.43112788	16.60261121	2.0432	3.17E-07	1.18E-05	-//-
AFLA_073050	18.28302309	4.478440582	2.0294	0.0024698	0.027315	-	FAD/NAD(P)-binding domain||FAD-binding domain
AFLA_073070	196.8538566	50.62272371	1.9593	1.12E-10	8.22E-09	-	Glycosyl hydrolase, five-bladed beta-propellor domain||Glycoside hydrolase, family 43
AFLA_073190	301.4656016	148.0484065	1.0259	0.00020865	0.0035806	-	Alpha/Beta hydrolase fold||Partial AB-hydrolase lipase domain
AFLA_073200	50.29081479	14.21253844	1.8231	2.78E-05	0.000635	-//-
AFLA_073210	10161.18152	3336.431016	1.6067	0.0037124	0.03758	-	RmlC-like cupin domain||Cupin 1||Bicupin, oxalate decarboxylase/oxidase||RmlC-like jelly roll fold
AFLA_073380	895.2760532	54.38360492	4.0411	2.10E-20	4.80E-18	-	Alpha/beta hydrolase fold-1||Alpha/Beta hydrolase fold
AFLA_073680	536.7427825	968.782391	-0.85194	0.0023466	0.026202	-	Alcohol dehydrogenase, C-terminal||Alcohol dehydrogenase superfamily, zinc-type||NAD(P)-binding domain||GroES-like||Polyketide synthase, enoylreductase domain||Alcohol dehydrogenase, N-terminal
AFLA_073800	3691.338182	399.79561	3.2068	3.46E-05	0.00076599	-	Short-chain dehydrogenase/reductase SDR||NAD(P)-binding domain||Short-chain dehydrogenase/reductase, conserved site
AFLA_073910	25.23387937	5.108999562	2.3042	7.18E-05	0.001429	-	FAD/NAD(P)-binding domain||Acetoacetate decarboxylase||Acetoacetate decarboxylase beta barrel domain||FAD-binding domain
AFLA_074220	516.7377761	279.4909377	0.88663	0.0006121	0.0086471	-	Ubiquitin-conjugating enzyme E2||Ubiquitin-conjugating enzyme/RWD-like||Poly(ADP-ribose) polymerase, catalytic domain
AFLA_074540	37.9849752	6.325116149	2.5863	8.15E-07	2.78E-05	-	Cytochrome P450, conserved site||Cytochrome P450
AFLA_074590	583.75514	128.5741058	2.1828	1.09E-15	1.59E-13	-	Alpha/Beta hydrolase fold||Alpha/beta hydrolase fold-1
AFLA_074610	90.2913544	18.92855135	2.254	1.27E-05	0.00032421	-	Major facilitator superfamily domain||Major facilitator superfamily
AFLA_074630	87.37907064	34.01351871	1.3612	9.80E-05	0.0018778	-	Major facilitator superfamily||Major facilitator superfamily domain
AFLA_074820	54.3390983	25.30333357	1.1027	0.0051331	0.047501	-	Berberine/berberine-like||CO dehydrogenase flavoprotein-like, FAD-binding, subdomain 2||FAD-binding, type 2||FAD linked oxidase, N-terminal
AFLA_074840	56.33271301	10.24461973	2.4591	2.39E-08	1.13E-06	-	Amino acid permease, conserved site||Amino acid permease/ SLC12A domain||Amino acid/polyamine transporter I
AFLA_074860	47.42362881	16.63369081	1.5115	0.00037979	0.0058856	-//-
AFLA_074870	148.8117167	64.69004478	1.2019	8.97E-05	0.0017374	-	Protein kinase-like domain||Protein kinase domain
AFLA_074940	160.1889173	47.83004014	1.7438	2.00E-05	0.00048098	-	Putative mucin or carbohydrate-binding domain||Peptidase family M60 domain
AFLA_074960	6.035783847	0	Inf	0.0018597	0.021655	-//-
AFLA_074970	371.1567987	179.1625255	1.0508	0.00011083	0.0020912	-	SNF2-related, N-terminal domain||P-loop containing nucleoside triphosphate hydrolase||Zinc finger, RING/FYVE/PHD-type||Helicase, C-terminal||Zinc finger, RING-type||Helicase superfamily 1/2, ATP-binding domain
AFLA_075040	1128.689167	452.3207198	1.3192	2.07E-07	8.11E-06	-	VRR-NUC domain||Fanconi-associated nuclease 1-like
AFLA_075100	830.3121511	2675.67178	-1.6882	5.91E-05	0.0012131	-//-
AFLA_075190	39295.51714	16627.7361	1.2408	3.17E-07	1.18E-05	-//-
AFLA_075200	9488.222248	4181.864159	1.182	1.07E-06	3.55E-05	-	Protein of unknown function DUF3328
AFLA_075400	68.85808653	7.390822189	3.2198	6.54E-13	7.03E-11	-	Polyketide synthase, enoylreductase domain||Alcohol dehydrogenase, N-terminal||GroES-like||NAD(P)-binding domain||Alcohol dehydrogenase superfamily, zinc-type
AFLA_075510	118.4158269	47.34559409	1.3226	0.0020114	0.023043	-	Amidase, conserved site||Amidase||Amidase signature domain
AFLA_075590	371.3180468	220.1996608	0.75384	0.0046465	0.044233	-	Polyketide cyclase SnoaL-like domain||NTF2-like domain
AFLA_075620	344.2637065	74.42752838	2.2096	1.60E-14	2.04E-12	-//-
AFLA_075720	48.00801694	322.6697987	-2.7487	0.00076659	0.010495	-	NAD(P)-binding domain||Short-chain dehydrogenase/reductase, conserved site||Short-chain dehydrogenase/reductase SDR
AFLA_075760	82.87811565	42.36554963	0.9681	0.0044025	0.04248	-	Transcription factor domain, fungi||Zn(2)-C6 fungal-type DNA-binding domain
AFLA_075810	17.23252637	1.267739768	3.7648	1.13E-05	0.00029562	-	P-loop containing nucleoside triphosphate hydrolase
AFLA_075820	33.60487304	2.368278244	3.8268	1.43E-09	8.72E-08	-	S-adenosyl-L-methionine-dependent methyltransferase
AFLA_075860	1528.835544	840.0683852	0.86385	0.00050468	0.007408	-	ML-like domain||TRP-like family
AFLA_075920	63.08094953	14.93080398	2.0789	1.01E-05	0.00026737	-	NAD(P)-binding domain||NAD-dependent epimerase/dehydratase, N-terminal domain
AFLA_075930	89.58137395	25.62040063	1.8059	6.47E-07	2.24E-05	-	Malic acid transport protein||Voltage-dependent anion channel
AFLA_075990	83.8408136	37.36354927	1.166	0.00074173	0.010219	-	Zinc finger, C2H2||Zinc finger, C2H2-like
AFLA_076010	46.15348715	12.47732106	1.8871	0.00036581	0.005702	-	P-loop containing nucleoside triphosphate hydrolase||Zinc finger, C2H2||Zinc finger C2H2-type/integrase DNA-binding domain||Nucleoside phosphorylase||Zinc finger, C2H2-like||Nucleoside phosphorylase domain
AFLA_076170	16.22600305	174.7541612	-3.4289	2.06E-15	2.83E-13	-//-
AFLA_076180	4.394766125	46.45814214	-3.4021	6.29E-05	0.0012808	-//-
AFLA_076460	332.7315572	739.2348663	-1.1517	7.55E-06	0.00020587	-	AAA+ ATPase domain||P-loop containing nucleoside triphosphate hydrolase||ATPase, AAA-type, core
AFLA_076470	459.9664023	66.02048853	2.8005	1.07E-09	6.60E-08	-//-
AFLA_076480	1138.181082	684.9042525	0.73276	0.0035153	0.035983	-	Glutathione S-transferase, C-terminal||Glutathione S-transferase, N-terminal||Glutathione S-transferase, C-terminal-like||Thioredoxin-like fold
AFLA_076720	3541.11605	1723.286711	1.039	2.13E-05	0.00050644	-	P-loop containing nucleoside triphosphate hydrolase||ATPase, AAA-type, core||AAA+ ATPase domain
AFLA_076730	275.057993	107.3013786	1.3581	1.11E-06	3.66E-05	-//-
AFLA_076810	60.24309148	25.54465873	1.2378	0.001151	0.014628	-//-
AFLA_076850	113.3315356	304.1340731	-1.4242	3.62E-07	1.33E-05	-	P-loop containing nucleoside triphosphate hydrolase||DNA recombination and repair protein Rad51, C-terminal
AFLA_076870	298.1869692	1055.781408	-1.824	0.0049659	0.046444	-	Xanthine/uracil/vitamin C permease||Xanthine/uracil permease
AFLA_076990	88.54541168	320.3056245	-1.855	7.78E-06	0.00021129	-	TauD/TfdA-like domain
AFLA_077090	27.73628516	3.617976323	2.9385	1.84E-06	5.77E-05	-	Concanavalin A-like lectin/glucanase domain||Glycosyl hydrolase, five-bladed beta-propellor domain||Glycoside hydrolase, family 43
AFLA_077190	76.93998958	36.22817835	1.0866	0.0020245	0.023141	-	FAD dependent oxidoreductase||FAD/NAD(P)-binding domain
AFLA_077270	294.9817847	539.7693778	-0.87172	0.00072869	0.010072	-	NADH:flavin oxidoreductase/NADH oxidase, N-terminal||Aldolase-type TIM barrel
AFLA_077290	164.7898998	306.355855	-0.89458	0.001046	0.013514	-	S-adenosyl-L-methionine-dependent methyltransferase
AFLA_077320	28.56467467	6.862258627	2.0575	0.00017987	0.0031632	-//-
AFLA_077390	171.3540446	24.68456156	2.7953	2.33E-16	3.58E-14	-//-
AFLA_077450	165.5476537	59.98706978	1.4645	1.79E-06	5.68E-05	-	NAD-dependent epimerase/dehydratase, N-terminal domain||NAD(P)-binding domain
AFLA_077460	92.34598618	30.05668081	1.6194	4.29E-06	0.00012328	-	Ankyrin repeat||Prion-inhibition and propagation, HeLo domain||Ankyrin repeat-containing domain
AFLA_077480	160.5086267	20.007473	3.004	5.03E-18	9.89E-16	-	Bulb-type lectin domain
AFLA_077540	50.78004442	102.7420589	-1.0167	0.0015632	0.018925	-//-
AFLA_077550	37.83859458	76.25814738	-1.011	0.0040807	0.040009	-//-
AFLA_077650	25.64626657	6.708640028	1.9347	0.00069425	0.0096582	-	Glycosyl hydrolase family, N-terminal domain||Six-hairpin glycosidase-like
AFLA_077720	192.5896728	28.00922245	2.7816	3.37E-17	5.90E-15	-//-
AFLA_077770	76.7790005	15.5917364	2.2999	4.39E-09	2.45E-07	-//-
AFLA_077830	294.7086219	89.87047227	1.7134	1.73E-09	1.04E-07	-	FAD/NAD(P)-binding domain||Glucose-methanol-choline oxidoreductase, N-terminal||Glucose-methanol-choline oxidoreductase||Glucose-methanol-choline oxidoreductase, C-terminal
AFLA_077840	694.2124415	56.9205248	3.6084	6.22E-09	3.38E-07	-	Glycoside hydrolase, family 61||Cellulose-binding domain, fungal
AFLA_078000	22.73268194	7.443696314	1.6107	0.0038291	0.03841	-	Polyketide cyclase SnoaL-like domain||NTF2-like domain
AFLA_078060	49.12439974	0.320819893	7.2585	2.07E-18	4.20E-16	-	CO dehydrogenase flavoprotein-like, FAD-binding, subdomain 2||FAD-binding, type 2||FAD-binding, type 2, subdomain 1||FAD linked oxidase, N-terminal
AFLA_078210	584.3259544	80.59656836	2.858	0.0037167	0.037593	-	Protein of unknown function DUF1295
AFLA_078360	38.81590098	13.34349526	1.5405	0.00058773	0.0083676	-//-
AFLA_078850	22.87787271	1.961002735	3.5443	4.28E-06	0.00012328	-	Amino acid transporter, transmembrane domain
AFLA_078880	203.3399052	368.3931187	-0.85735	0.0011966	0.015148	-	Something about silencing protein 4
AFLA_079020	1302.865621	698.4232332	0.89951	0.00033257	0.0052688	-//-
AFLA_079190	33.47311938	12.35478207	1.4379	0.0026847	0.029187	-	AMP-binding, conserved site||AMP-dependent synthetase/ligase||Acetoacetyl-CoA synthase||Acetyl-coenzyme A synthetase, N-terminal domain
AFLA_079370	30.48269232	11.24691562	1.4385	0.0033432	0.034778	-//-
AFLA_079380	517.2440579	148.3707884	1.8016	2.03E-11	1.65E-09	-	Phosphopantetheine attachment site||Phosphopantetheine binding ACP domain||AMP-binding, conserved site||NAD(P)-binding domain||AMP-dependent synthetase/ligase||Male sterility, NAD-binding
AFLA_079420	244.7560633	47.04352205	2.3793	1.57E-10	1.13E-08	-//-
AFLA_079970	81.90453538	410.2421138	-2.3245	2.72E-16	4.13E-14	-//-
AFLA_080170	475.0023881	280.6917202	0.75895	0.0036141	0.036876	-	SANT/Myb domain||Myb domain||Homeodomain-like
AFLA_080510	88.97861423	38.62557909	1.2039	0.00046318	0.0069099	-//-
AFLA_080560	30.2313312	9.874678545	1.6142	0.0014251	0.017453	-	Heterokaryon incompatibility
AFLA_080860	395.980662	783.0326284	-0.98364	0.0014252	0.017453	-//-
AFLA_081690	50.59218967	23.35500166	1.1152	0.0039345	0.039146	-//-
AFLA_081910	211.8709386	404.2550527	-0.93208	0.00047841	0.0070875	-	Metallopeptidase, catalytic domain||Putative peptidase domain, HRXXH
AFLA_081920	267.5641587	1001.602453	-1.9044	2.99E-13	3.33E-11	-	Zinc/iron permease
AFLA_081990	15.90141462	3.479897525	2.192	0.002799	0.030148	-	Protein kinase-like domain
AFLA_082090	46.57075333	11.47627612	2.0208	7.89E-06	0.00021367	-	Transcription factor domain, fungi||Zn(2)-C6 fungal-type DNA-binding domain
AFLA_082110	235.5296023	129.7980951	0.85964	0.0019167	0.022197	-	WD40 repeat, conserved site||WD40 repeat||P-loop containing nucleoside triphosphate hydrolase||WD40-repeat-containing domain||G-protein beta WD-40 repeat||WD40/YVTN repeat-like-containing domain
AFLA_082150	12.42172093	1.267739768	3.2925	0.00049148	0.0072475	-	Polyketide synthase, phosphopantetheine-binding domain||Thioesterase||Polyketide synthase, acyl transferase domain||Thiolase-like||Beta-ketoacyl synthase, C-terminal||Malonyl-CoA ACP transacylase, ACP-binding||Polyketide product template domain||Beta-ketoacyl synthase, N-terminal||Alpha/Beta hydrolase fold||Beta-ketoacyl synthase, active site||Ketoacyl-synthetase, C-terminal extension||Acyl trans…
AFLA_082190	104.6128509	16.91235029	2.6289	1.39E-12	1.36E-10	-//-
AFLA_082200	6053.984048	952.70823	2.6678	4.95E-12	4.56E-10	-	AAA+ ATPase domain||P-loop containing nucleoside triphosphate hydrolase||ATPase, AAA-type, core
AFLA_082210	344.9797458	89.70379945	1.9433	1.07E-07	4.46E-06	-//-
AFLA_082220	467.9925244	129.7751947	1.8505	0.00010104	0.001928	-	NAD(P)-binding domain||Short-chain dehydrogenase/reductase SDR
AFLA_082410	85.24394431	32.862608	1.3752	9.29E-05	0.0017948	-	Alpha/Beta hydrolase fold
AFLA_082430	335.9989102	147.4246027	1.1885	1.26E-05	0.00032214	-	Zn(2)-C6 fungal-type DNA-binding domain
AFLA_082470	72.93821573	8.033712918	3.1825	1.25E-05	0.00032025	-	AMP-binding enzyme C-terminal domain||AMP-dependent synthetase/ligase
AFLA_082700	1316.565554	645.0250917	1.0294	2.71E-05	0.00062273	-//-
AFLA_082720	2006.799542	3303.351501	-0.71903	0.0049525	0.046387	-	ELO family
AFLA_082730	368.4886458	198.2195595	0.89452	0.00084074	0.011279	-	Aminotransferase class-III||Pyridoxal phosphate-dependent transferase, major region, subdomain 2||Pyridoxal phosphate-dependent transferase, major region, subdomain 1||Pyridoxal phosphate-dependent transferase
AFLA_082790	178.9076422	54.55850127	1.7133	2.93E-08	1.37E-06	-//-
AFLA_082850	84.64492922	21.16500552	1.9997	7.92E-08	3.40E-06	-	Zinc finger C2H2-type/integrase DNA-binding domain||Zinc finger, C2H2-like||Zinc finger, C2H2
AFLA_082870	106.1513048	47.27984344	1.1668	0.00035616	0.0055734	-	Acyl-CoA N-acyltransferase||GNAT domain
AFLA_082930	342.2630636	158.2692746	1.1127	4.69E-05	0.00098883	-	Short-chain dehydrogenase/reductase, conserved site||NAD(P)-binding domain||Short-chain dehydrogenase/reductase SDR
AFLA_082960	12.16305558	87.15156178	-2.841	0.0027542	0.029791	-//-
AFLA_082970	213.4019118	87.43270684	1.2873	8.06E-06	0.0002173	-	Major facilitator superfamily||Major facilitator superfamily domain
AFLA_083360	2927.747993	1380.686735	1.0844	1.17E-05	0.00030363	-	Glycoside hydrolase family 16||Concanavalin A-like lectin/glucanase domain||Glycoside hydrolase, family 16, CRH1, predicted
AFLA_083610	182.69619	57.0716298	1.6786	2.68E-05	0.00061836	-	Thioredoxin-like fold
AFLA_083770	255.4831191	100.835359	1.3412	0.00030348	0.0049238	-//-
AFLA_083790	429.3232361	216.7978131	0.98571	0.00022308	0.0037727	-	von Willebrand factor, type A
AFLA_083840	123.5582944	56.95785912	1.1172	0.00043056	0.0065349	-//-
AFLA_083950	1167.292088	298.9400302	1.9652	1.62E-07	6.49E-06	-	Major facilitator superfamily||Major facilitator superfamily domain
AFLA_084040	24.83000476	8.3725745	1.5683	0.0036072	0.036836	-//-
AFLA_084280	174.8289704	84.8572134	1.0428	0.00037258	0.005788	-	Cytochrome P450||Cytochrome P450, E-class, group I
AFLA_084290	44.59301948	2.368278244	4.2349	8.34E-13	8.74E-11	-//-
AFLA_084310	40.01646744	14.19449675	1.4953	0.0010286	0.013351	-//-
AFLA_084370	1702.36784	886.8593842	0.94077	0.00015893	0.0028498	-	Protein of unknown function DUF3445
AFLA_084510	609.6953662	203.8294568	1.5807	2.59E-09	1.49E-07	-	Helicase superfamily 1/2, ATP-binding domain||Helicase, C-terminal||P-loop containing nucleoside triphosphate hydrolase||SNF2-related, N-terminal domain
AFLA_084560	222.8783504	101.8688958	1.1295	8.02E-05	0.0015779	-	Aldo/keto reductase/potassium channel subunit beta||NADP-dependent oxidoreductase domain
AFLA_084720	301.347221	772.9661315	-1.359	1.59E-05	0.00039478	-	Zn(2)-C6 fungal-type DNA-binding domain
AFLA_084810	580.6729574	154.0307188	1.9145	1.35E-12	1.35E-10	-//-
AFLA_084950	4506.642616	1034.348669	2.1233	0.00031087	0.0050174	-//-
AFLA_085370	241.7397668	427.5445491	-0.82262	0.0016917	0.020175	-	Centrosomin, N-terminal motif 1
AFLA_085400	25420.31551	12217.05266	1.0571	1.76E-05	0.00043119	-	Alkaline phosphatase-like, alpha/beta/alpha||Metalloenzyme||Alkaline-phosphatase-like, core domain||BPG-independent PGAM, N-terminal||Phosphoglycerate mutase, 2,3-bisphosphoglycerate-independent
AFLA_085430	875.3909502	471.8832601	0.8915	0.00043521	0.0065771	-	Prenylcysteine oxidase||FAD/NAD(P)-binding domain||Prenylcysteine lyase
AFLA_085470	168.0061971	38.38782907	2.1298	5.75E-11	4.43E-09	-//-
AFLA_085480	1413.880797	578.6281053	1.289	0.0029294	0.031159	-	Glycoside hydrolase family 16||Concanavalin A-like lectin/glucanase domain
AFLA_085610	131.8073564	53.59405647	1.2983	2.73E-05	0.00062438	-	WD40 repeat, conserved site||WD40 repeat||G-protein beta WD-40 repeat||WD40-repeat-containing domain||WD40/YVTN repeat-like-containing domain
AFLA_085640	33.34989681	9.951671388	1.7447	0.00054052	0.0078439	-	Peroxisomal biogenesis factor 11
AFLA_085670	22.26542051	6.387820135	1.8014	0.0025351	0.027917	-	Major facilitator superfamily||Major facilitator superfamily domain
AFLA_085930	249.0274403	458.5563662	-0.88079	0.00085312	0.011409	-//-
AFLA_086020	12.49492974	2.334696753	2.42	0.0034145	0.035376	-	Major facilitator superfamily domain||Major facilitator superfamily
AFLA_086080	51.92083917	9.449361345	2.458	7.90E-08	3.40E-06	-	FAD linked oxidase, N-terminal||FAD-binding, type 2, subdomain 1||CO dehydrogenase flavoprotein-like, FAD-binding, subdomain 2||FAD-binding, type 2||Berberine/berberine-like
AFLA_086350	147.685576	72.91721251	1.0182	0.00066044	0.0092383	-	S-adenosyl-L-methionine-dependent methyltransferase
AFLA_086400	5452.538625	9080.972384	-0.73592	0.0020841	0.023684	-	Isopropylmalate dehydrogenase-like domain||Isocitrate/isopropylmalate dehydrogenase, conserved site||Isocitrate dehydrogenase NADP-dependent
AFLA_086650	307.0428031	582.7631342	-0.92447	0.00036532	0.005702	-	Protein of unknown function DUF3602
AFLA_086660	910.3521867	446.5870045	1.0275	4.76E-05	0.00099882	-	Mitochondrial substrate/solute carrier||Mitochondrial carrier domain
AFLA_086840	1808.851746	2931.804939	-0.69671	0.0041866	0.040828	-	Structural maintenance of chromosomes protein||RecF/RecN/SMC, N-terminal||P-loop containing nucleoside triphosphate hydrolase||SMCs flexible hinge
AFLA_087020	17.75104693	3.193910068	2.4745	0.00060821	0.0086017	-	FAD-binding, type 2
AFLA_087090	704.4226292	1270.200571	-0.85054	0.00073584	0.01016	-	Transcription factor domain, fungi||Zn(2)-C6 fungal-type DNA-binding domain
AFLA_087210	3118.975337	1713.918637	0.86377	0.00040845	0.0062464	-	Spherulation-specific family 4
AFLA_087240	1245.087003	580.9088551	1.0999	0.0037987	0.038241	-	Thioredoxin-like fold||Glutathione S-transferase, C-terminal-like||Glutathione S-transferase, N-terminal
AFLA_087520	1060.282525	650.2136324	0.70546	0.0051164	0.047424	-	Cyclin, C-terminal domain||Cyclin-like||Cyclin, N-terminal
AFLA_087540	125.4605508	47.96006849	1.3873	1.33E-05	0.00033665	-	Jacalin-like lectin domain
AFLA_087620	140.6689816	274.0591612	-0.96218	0.00056704	0.0081385	-	NmrA-like domain||NAD(P)-binding domain
AFLA_087670	242.8342184	413.3605487	-0.76743	0.003836	0.03841	-//-
AFLA_087780	1218.136817	166.8472686	2.8681	2.03E-05	0.00048672	-//-
AFLA_087830	273.4780009	148.0528655	0.88531	0.0013229	0.016342	-	Ubiquitin interacting motif||XPG N-terminal||XPG-I domain||XPG/Rad2 endonuclease, eukaryotes||5'-3' exonuclease, C-terminal domain||Helix-hairpin-helix motif, class 2||PIN domain-like||XPG/Rad2 endonuclease||XPG conserved site
AFLA_087930	66.03364708	164.3310817	-1.3153	1.73E-05	0.00042324	-//-
AFLA_088120	393.0211214	692.7617337	-0.81775	0.0013597	0.016741	-	AMP-dependent synthetase/ligase
AFLA_088180	253.5245126	443.2259329	-0.80592	0.0033102	0.034571	-	THO complex, subunit 5
AFLA_088550	1519.557522	875.2516444	0.79588	0.0011281	0.014394	-	Phosphatidyl-N-methylethanolamine/N-methyltransferase||Phospholipid methyltransferase
AFLA_089500	811.1540794	375.2684692	1.1121	8.79E-06	0.00023497	-	Cation-transporting P-type ATPase, N-terminal||P-type ATPase||P-type ATPase, A domain||P-type ATPase, phosphorylation site||P-type ATPase, cytoplasmic domain N||HAD-like domain||P-type ATPase, transmembrane domain||Cation-transporting P-type ATPase, C-terminal||P-type ATPase, subfamily IIB
AFLA_089540	66.18129157	26.7566554	1.3065	0.00049757	0.0073203	-	Alpha/Beta hydrolase fold
AFLA_089560	846.1525472	388.0341299	1.1247	7.55E-06	0.00020587	-	Thiamine pyrophosphate enzyme, central domain||Thiamine pyrophosphate enzyme, N-terminal TPP-binding domain||DHS-like NAD/FAD-binding domain||Thiamin diphosphate-binding fold||Thiamine pyrophosphate enzyme, C-terminal TPP-binding||Thiamine pyrophosphate (TPP)-dependent enzyme
AFLA_089590	2621.110409	1457.924886	0.84626	0.00051183	0.0074891	-	EthD domain||Dimeric alpha-beta barrel
AFLA_089620	23.2646211	3.853591542	2.5939	0.0038343	0.03841	-	Chalcone/stilbene synthase, N-terminal||Polyketide synthase, type III||Chalcone/stilbene synthase, C-terminal||Thiolase-like
AFLA_089650	15.35844511	2.856299429	2.4268	0.0049641	0.046444	-	Iron permease FTR1/Fip1/EfeU
AFLA_089670	9.128692137	1.032124549	3.1448	0.003192	0.033505	-	FAD-binding 8||Ferric reductase, NAD binding domain||Ferric reductase transmembrane component-like domain||Ferredoxin reductase-type FAD-binding domain
AFLA_089700	150.1368892	37.72295443	1.9928	1.59E-08	7.80E-07	-	Protein of unknown function DUF3632
AFLA_089820	39.19899726	15.86951203	1.3046	0.0034851	0.035788	-	Luciferase-like domain
AFLA_090010	2440.349749	1117.069839	1.1274	0.00012082	0.002265	-	ATP-grasp fold||Pre-ATP-grasp domain||ATP-grasp fold, subdomain 2
AFLA_090020	373.331546	161.817502	1.2061	0.0014383	0.01758	-	Major facilitator superfamily domain||Proton-dependent oligopeptide transporter family
AFLA_090070	335.4571946	157.6581416	1.0893	5.23E-05	0.0010862	-//-
AFLA_090090	180.8986651	37.50895604	2.2699	8.75E-07	2.96E-05	-	Peptidase M14, carboxypeptidase A
AFLA_090180	194.1954973	57.955668	1.7445	6.67E-08	2.92E-06	-	Alpha/Beta hydrolase fold||Serine aminopeptidase, S33
AFLA_090260	126.2926109	41.44863611	1.6074	6.03E-07	2.09E-05	-//-
AFLA_090320	373.8568912	623.9493522	-0.73894	0.00388	0.038725	-	Zinc finger, RING-like||Non-structural maintenance of chromosomes element 1||Zinc finger, RING-type||Zinc finger, RING/FYVE/PHD-type
AFLA_090480	127.9592304	43.35963369	1.5613	1.47E-06	4.75E-05	-//-
AFLA_090490	248.7174603	125.9559514	0.98159	0.00045661	0.0068277	-	Glycoside hydrolase, family 65, central catalytic||Galactose mutarotase-like domain||Glycoside hydrolase, family 65, N-terminal||Six-hairpin glycosidase||Six-hairpin glycosidase-like
AFLA_090530	164.2483322	90.48853811	0.86007	0.0031915	0.033505	-//-
AFLA_090540	185.8122193	47.68567861	1.9622	1.20E-10	8.75E-09	-	Ankyrin repeat||Ankyrin repeat-containing domain
AFLA_090550	24.95328283	3.68639025	2.7589	1.92E-05	0.00046478	-	Metallo-beta-lactamase||SCP2 sterol-binding domain||Alkyl sulfatase, C-terminal||Alkyl sulfatase dimerisation domain
AFLA_090590	321.3920947	125.4472253	1.3573	1.05E-06	3.49E-05	-	Alpha-1,2-mannosidase, putative||Glycoside hydrolase-type carbohydrate-binding||Six-hairpin glycosidase-like||Glycosyl hydrolase family 92
AFLA_090690	16561.80782	30091.07058	-0.86148	0.00031689	0.0050961	-	Catalase, mono-functional, haem-containing||Catalase-like domain||Catalase haem-binding site||Catalase core domain||Catalase, mono-functional, haem-containing, clade 2||Class I glutamine amidotransferase-like||Catalase immune-responsive domain
AFLA_090960	242.0668175	944.0296325	-1.9634	0.00024341	0.004068	-	FAD-binding 8||Ferric reductase, NAD binding domain||Ferric reductase transmembrane component-like domain||Ferredoxin reductase-type FAD-binding domain||Ferric/cupric reductase transmembrane component 7||Riboflavin synthase-like beta-barrel
AFLA_091000	920.4370183	197.8035274	2.2183	1.59E-06	5.11E-05	-	Cytochrome P450, conserved site||Cytochrome P450, E-class, group I||Cytochrome P450
AFLA_091010	58.41661722	120.3658916	-1.043	0.0009551	0.012537	-	Mpv17/PMP22
AFLA_091070	619.8621882	321.20141	0.94847	0.00020092	0.0034713	-	Protein of unknown function DUF1348||NTF2-like domain
AFLA_091330	751.2599257	333.4095623	1.172	4.96E-06	0.00014132	-//-
AFLA_091500	157.6562057	15.12337494	3.3819	1.58E-20	3.80E-18	-	Glycoside hydrolase, family 35||Glycoside hydrolase superfamily||Glycoside hydrolase 35, catalytic domain||Galactose-binding domain-like||Beta-galactosidase jelly roll domain||Beta-galactosidase, domain 3||Glycoside hydrolase, catalytic domain||Beta-galactosidase, domain 2
AFLA_091930	1236.114671	2163.600912	-0.80762	0.0010266	0.013338	-	Alpha/beta hydrolase fold-1||Homoserine acetyltransferase||Alpha/Beta hydrolase fold
AFLA_092090	275.9524721	89.80583918	1.6195	3.70E-08	1.68E-06	-	Short-chain dehydrogenase/reductase, conserved site||NAD(P)-binding domain||Short-chain dehydrogenase/reductase SDR
AFLA_092210	211.2888462	104.683402	1.0132	0.00041331	0.0063132	-	Peptidase S10, serine carboxypeptidase||Alpha/Beta hydrolase fold
AFLA_092230	71.33737127	34.80181621	1.0355	0.0038208	0.038404	-	Major facilitator superfamily domain||Major facilitator superfamily
AFLA_092670	67.84672124	131.6281693	-0.95612	0.0020736	0.023587	-	tRNA wybutosine synthesizing protein 2||S-adenosyl-L-methionine-dependent methyltransferase||SAM-dependent methyltransferase TRM5/TYW2-type
AFLA_092860	168.8140019	89.95460369	0.90817	0.0016602	0.019912	-	Cupin domain of unknown function DUF985||RmlC-like cupin domain||RmlC-like jelly roll fold
AFLA_093060	3574.262258	1562.064498	1.1942	1.25E-06	4.11E-05	-	DNA ligase, ATP-dependent, N-terminal||DNA ligase, ATP-dependent, central||Nucleic acid-binding, OB-fold||DNA ligase, ATP-dependent, C-terminal||DNA ligase 4||BRCT domain||DNA ligase, ATP-dependent, conserved site||DNA ligase, ATP-dependent
AFLA_093370	2058.233101	3732.817132	-0.85886	0.00049369	0.0072717	-	Ribonucleotide reductase-related||Ferritin-like superfamily||Ribonucleotide reductase small subunit||Ribonucleotide reductase small subunit, acitve site
AFLA_093500	62.54543227	123.9802765	-0.98713	0.0017053	0.0203	-	Protein kinase domain||Protein kinase-like domain
AFLA_093520	892.285128	1736.637105	-0.96072	0.00019205	0.0033361	-	Amidohydrolase-related||Metal-dependent hydrolase||Amino-carboxymuconate-semialdehyde decarboxylase
AFLA_093530	445.2091015	822.0294298	-0.88471	0.00052994	0.0077167	-	Isopenicillin N synthase-like||Non-haem dioxygenase N-terminal domain||Oxoglutarate/iron-dependent dioxygenase
AFLA_093750	317.4648121	184.6152851	0.78207	0.0040019	0.039519	-	Protein kinase-like domain||Serine/threonine-protein kinase ATM||PIK-related kinase||Phosphatidylinositol 3-/4-kinase, catalytic domain||Phosphatidylinositol 3/4-kinase, conserved site||PIK-related kinase, FAT||FATC domain
AFLA_093780	37.82150536	15.77197561	1.2618	0.004876	0.045838	-//-
AFLA_093790	627.2021911	316.7430522	0.98562	0.00015719	0.0028306	-	DhaL domain||DhaK domain||Dihydroxyacetone kinase
AFLA_093830	40.19461974	16.26570673	1.3052	0.0025013	0.027592	-	AMP-dependent synthetase/ligase||AMP-binding, conserved site
AFLA_093920	374.9102657	54.62996187	2.7788	3.52E-14	4.37E-12	-	Oil body-associated protein-like
AFLA_094010	2050.49012	1112.213658	0.88253	0.00044828	0.0067427	-	Basic-leucine zipper domain
AFLA_094050	531.3644476	865.2146019	-0.70336	0.0051946	0.047986	-	DNA polymerase alpha, subunit B||DNA polymerase alpha/epsilon, subunit B||DNA polymerase alpha, subunit B N-terminal
AFLA_094110	61.63393794	27.36633172	1.1713	0.0021018	0.023804	-//-
AFLA_094140	6.466468627	0.355652328	4.1844	0.0053218	0.048878	-	Intradiol ring-cleavage dioxygenase, core
AFLA_094180	2107.791277	209.4166757	3.3313	0.0015838	0.019121	-//-
AFLA_094240	143.6848354	334.4256466	-1.2188	7.99E-06	0.0002161	-	SUN domain||SUN domain-containing protein 1
AFLA_094320	74.84151391	23.9487711	1.6439	3.28E-05	0.00072977	-	Ankyrin repeat||Ankyrin repeat-containing domain||F-box domain
AFLA_094350	351.9089669	627.9891592	-0.83554	0.0010686	0.013742	-	Glycosyltransferase subfamily 4-like, N-terminal domain||Glycosyl transferase, family 1
AFLA_094600	53.96076998	4.528812819	3.5747	3.75E-06	0.00010907	-//-
AFLA_094850	887.363824	1517.676227	-0.77427	0.0016102	0.019405	-	Glucose-methanol-choline oxidoreductase, C-terminal||FAD/NAD(P)-binding domain||Glucose-methanol-choline oxidoreductase, N-terminal||Glucose-methanol-choline oxidoreductase
AFLA_094860	41.8111515	92.2637811	-1.1419	0.00066657	0.0093138	-	Protein kinase-like domain||Protein kinase domain||Serine/threonine-protein kinase, active site||Protein kinase, ATP binding site
AFLA_094870	257.0944858	54.33467302	2.2424	1.05E-13	1.24E-11	-//-
AFLA_095200	74.31313436	32.86206322	1.1772	0.00088225	0.011701	-	Alpha/beta hydrolase fold-1||Peptidase S33 tripeptidyl aminopeptidase-like, C-terminal||Alpha/Beta hydrolase fold
AFLA_095300	152.2401883	70.17810922	1.1173	0.0002604	0.0043226	-	Ankyrin repeat||Ankyrin repeat-containing domain
AFLA_095310	73.52258536	13.72701914	2.4212	2.37E-09	1.40E-07	-//-
AFLA_095350	185.3776704	56.95036976	1.7027	3.14E-08	1.45E-06	-	Acetoacetate decarboxylase beta barrel domain
AFLA_095380	13.34895807	0.945668932	3.8192	0.0023816	0.02653	-	Major facilitator superfamily domain||Major facilitator superfamily
AFLA_095390	17.89625619	2.281822627	2.9714	8.21E-05	0.0016115	-	Major facilitator superfamily domain||Major facilitator superfamily
AFLA_095400	83.38337416	440.292322	-2.4006	0.0042565	0.041383	-//-
AFLA_095440	643.5613312	282.9120292	1.1857	4.14E-06	0.00011967	-	Tetratricopeptide-like helical domain||Serine/threonine-protein kinase, active site||Protein kinase domain||Protein kinase-like domain
AFLA_095520	130.4469722	61.84857899	1.0767	0.00056249	0.0080985	-	NAD(P)-binding domain||Alcohol dehydrogenase superfamily, zinc-type||Alcohol dehydrogenase, C-terminal||Polyketide synthase, enoylreductase domain||Alcohol dehydrogenase, N-terminal||GroES-like
AFLA_095770	263.2290988	1287.434025	-2.2901	1.33E-05	0.00033693	-	WD40-repeat-containing domain||WD40/YVTN repeat-like-containing domain
AFLA_095800	46.3987154	8.234495702	2.4943	1.58E-07	6.34E-06	-	Short-chain dehydrogenase/reductase SDR||NAD(P)-binding domain
AFLA_095830	167.1606074	92.23804435	0.8578	0.0034744	0.035707	-	NAD(P)-binding domain||Short-chain dehydrogenase/reductase SDR
AFLA_096110	86.09064991	40.18339823	1.0993	0.0010412	0.013473	-//-
AFLA_096130	20.90498082	0.304029147	6.1035	1.76E-07	6.96E-06	-//-
AFLA_097190	1674.460867	472.1112108	1.8265	0.00068195	0.0095079	-//-
AFLA_097250	22.57649783	5.224577673	2.1114	0.00058467	0.0083333	-	Thioesterase domain||HotDog domain
AFLA_097260	2679.419816	1276.879302	1.0693	2.72E-05	0.00062438	-	Dynamin central domain||Dynamin superfamily||Dynamin, GTPase domain||GTPase effector domain||P-loop containing nucleoside triphosphate hydrolase
AFLA_097290	16.38334002	4.140829943	1.9842	0.0050791	0.047192	-	NAD(P)-binding domain||Saccharopine dehydrogenase, NADP binding domain
AFLA_097330	701.1207562	345.6442462	1.0204	0.00063026	0.0088744	-	Sugar/inositol transporter||Major facilitator, sugar transporter-like||Sugar transporter, conserved site||Major facilitator superfamily domain
AFLA_097340	1377.512193	143.722717	3.2607	4.39E-27	1.60E-24	-//-
AFLA_097350	72.82581999	6.290283713	3.5333	1.09E-14	1.44E-12	-	Amino acid transporter, transmembrane domain
AFLA_097470	6433.974	3583.586876	0.84431	0.00060388	0.0085594	-	Cytochrome P450, E-class, group I||Cytochrome P450, conserved site||Cytochrome P450
AFLA_097640	33.96234901	10.3744867	1.7109	0.0005396	0.0078396	-//-
AFLA_097650	670.7506162	207.2540673	1.6944	9.94E-11	7.39E-09	-	NTF2-like domain
AFLA_097700	284.3150087	54.95148792	2.3713	6.55E-10	4.25E-08	-	Metallo-beta-lactamase
AFLA_097830	1683.645414	968.6627586	0.79752	0.0014496	0.017702	-	Carbohydrate kinase, FGGY-related||Carbohydrate kinase, FGGY, N-terminal||Carbohydrate kinase, FGGY, C-terminal
AFLA_097950	82.851398	38.77223681	1.0955	0.0016832	0.020131	-//-
AFLA_097960	3657.06912	1408.881056	1.3761	2.41E-08	1.14E-06	-	ATPase, AAA-type, conserved site||AAA+ ATPase domain||P-loop containing nucleoside triphosphate hydrolase||BCS1, N-terminal||ATPase, AAA-type, core
AFLA_098040	1081.212382	623.5268195	0.79413	0.0017116	0.020353	-	NADP-dependent oxidoreductase domain||Aldo/keto reductase/potassium channel subunit beta||Aldo/keto reductase||Aldo/keto reductase, conserved site
AFLA_098620	13.15500745	2.637474955	2.3184	0.0036777	0.037346	-//-
AFLA_098660	27.75091212	9.162122944	1.5988	0.0022523	0.025259	-//-
AFLA_098700	987.7132241	1672.757756	-0.76006	0.0021606	0.024359	-	NAD(P)-binding domain||Short-chain dehydrogenase/reductase, conserved site||Short-chain dehydrogenase/reductase SDR
AFLA_098920	962.5907527	262.4672789	1.8748	7.44E-09	3.92E-07	-	Protein of unknown function DUF3632
AFLA_098930	88.53816296	29.09297018	1.6056	6.21E-06	0.00017137	-	Protein of unknown function DUF1479||Isopenicillin N synthase-like
AFLA_099000	1416.427963	855.3693243	0.72764	0.0033223	0.034611	-	Superoxide dismutase, copper/zinc, binding site||Superoxide dismutase, copper/zinc binding domain
AFLA_099250	1146.946146	632.9706486	0.85759	0.00063779	0.0089508	-	Biotin/lipoyl attachment||Biotin carboxylation domain||Pre-ATP-grasp domain||Carbamoyl-phosphate synthetase large subunit-like, ATP-binding domain||ATP-grasp fold||Single hybrid motif||ATP-grasp fold, subdomain 2||Biotin carboxylase, C-terminal||Biotin carboxylase-like, N-terminal domain||ATP-grasp fold, subdomain 1||Rudiment single hybrid motif
AFLA_099270	845.731915	366.7004497	1.2056	0.00039013	0.0060167	-	Acyl-CoA dehydrogenase, conserved site||Acyl-CoA dehydrogenase/oxidase C-terminal||Acyl-CoA oxidase/dehydrogenase, central domain||Acyl-CoA dehydrogenase/oxidase, N-terminal||Acyl-CoA dehydrogenase/oxidase, N-terminal and middle domain
AFLA_099280	865.4885563	401.0215727	1.1098	1.40E-05	0.0003529	-	Acetyl-coenzyme A carboxyltransferase, N-terminal||Acetyl-coenzyme A carboxyltransferase, C-terminal||ClpP/crotonase-like domain||Carboxyl transferase
AFLA_099290	394.8387229	659.4027267	-0.7399	0.0035024	0.03588	-	Small GTP-binding protein domain||Small GTPase superfamily, Ras type||Small GTPase superfamily||P-loop containing nucleoside triphosphate hydrolase
AFLA_099360	94.65196059	31.94264781	1.5671	5.30E-06	0.00014924	-	Protein of unknown function DUF3445
AFLA_099470	17.33500761	3.90396378	2.1507	0.0019126	0.022169	-//-
AFLA_099580	387.1168506	179.2234898	1.111	3.94E-05	0.00085633	-	Protein of unknown function DUF1752, fungi
AFLA_099620	35.53384704	82.07023977	-1.2077	0.00056729	0.0081385	-//-
AFLA_099750	183.4088832	45.90045608	1.9985	0.00454	0.043512	-	Alpha/Beta hydrolase fold||Epoxide hydrolase-like||Alpha/beta hydrolase fold-1
AFLA_099760	397.0815696	2648.560803	-2.7377	2.98E-05	0.00067424	-//-
AFLA_099800	1367.670601	2331.033802	-0.76925	0.0016374	0.019675	-//-
AFLA_099980	226.6326273	72.01516063	1.654	2.83E-08	1.33E-06	-//-
AFLA_100200	4049.775212	1101.484767	1.8784	3.60E-14	4.43E-12	-	Syntaxin, N-terminal domain||t-SNARE||Target SNARE coiled-coil homology domain
AFLA_100210	402.5754983	125.909082	1.6769	2.08E-07	8.11E-06	-	Ankyrin repeat-containing domain||Ankyrin repeat
AFLA_100220	363.5033487	106.1241863	1.7762	1.06E-10	7.82E-09	-//-
AFLA_100240	84.03970724	33.46441157	1.3284	0.00015592	0.0028156	-	Glucose-methanol-choline oxidoreductase, C-terminal||FAD/NAD(P)-binding domain||Glucose-methanol-choline oxidoreductase, N-terminal||Glucose-methanol-choline oxidoreductase
AFLA_100260	2032.121936	436.34816	2.2194	7.37E-18	1.41E-15	-	Bacteriophage T5, Orf172 DNA-binding
AFLA_100280	26.30384502	7.740764576	1.7647	0.004762	0.045166	-	Major facilitator superfamily domain||Major facilitator superfamily
AFLA_100290	202.8824102	28.50582256	2.8313	1.00E-17	1.89E-15	-	Nitrilase/cyanide hydratase, conserved site||Carbon-nitrogen hydrolase
AFLA_100310	54.28666782	12.27778922	2.1445	5.89E-07	2.05E-05	-	NAD(P)-binding domain||NAD-dependent epimerase/dehydratase, N-terminal domain
AFLA_100330	121.7368002	24.85551569	2.2921	8.40E-11	6.35E-09	-	FAD/NAD(P)-binding domain||NAD(P)-binding domain
AFLA_100650	1947.075024	3833.061108	-0.97719	5.72E-05	0.0011796	-	Alpha/Beta hydrolase fold||Peptidase S10, serine carboxypeptidase||Serine carboxypeptidase, serine active site
AFLA_100670	4007.032783	7614.5483	-0.92622	0.00012716	0.002363	-	PUA-like domain||Adenylyl-sulfate kinase||Sulphate adenylyltransferase catalytic domain||ATP-sulfurylase PUA-like domain||Rossmann-like alpha/beta/alpha sandwich fold||P-loop containing nucleoside triphosphate hydrolase||Sulphate adenylyltransferase
AFLA_100680	2016.177393	1043.492912	0.9502	0.00014049	0.0025769	-	Protein of unknown function DUF2855
AFLA_101040	1684.095096	544.3949653	1.6292	5.19E-05	0.0010806	-	Ras guanine nucleotide exchange factor domain
AFLA_101250	772.3070913	100.8950163	2.9363	1.65E-07	6.60E-06	-	NAD(P)-binding domain||Short-chain dehydrogenase/reductase SDR
AFLA_101270	133.8777865	55.64154284	1.2667	7.14E-05	0.0014245	-	Carbohydrate-binding WSC
AFLA_101330	18.54166993	4.954130018	1.9041	0.0036454	0.037113	-//-
AFLA_101540	15.37309057	3.548311452	2.1152	0.0040675	0.039971	-//-
AFLA_101570	69.21183637	1.691806023	5.3544	7.06E-06	0.00019371	-	FAD-binding domain||FAD/NAD(P)-binding domain
AFLA_101580	904.7464657	13.76185158	6.0388	1.87E-08	8.95E-07	-	Alpha/beta hydrolase fold-3||Alpha/Beta hydrolase fold
AFLA_101770	1445.518269	780.2241822	0.88963	0.00056169	0.008096	-	Histidine phosphatase superfamily
AFLA_101840	279.5235712	2.976336538	6.5533	2.45E-28	9.22E-26	-//-
AFLA_101930	1496.149395	2444.638794	-0.70837	0.0040901	0.040071	-	Aldehyde dehydrogenase domain||Aldehyde dehydrogenase N-terminal domain||Aldehyde dehydrogenase, C-terminal||Aldehyde/histidinol dehydrogenase
AFLA_101960	104.7518348	28.95935038	1.8549	0.00015428	0.0027978	-	Berberine/berberine-like||CO dehydrogenase flavoprotein-like, FAD-binding, subdomain 2||FAD-binding, type 2||FAD linked oxidase, N-terminal
AFLA_102030	163.4246551	317.4927691	-0.9581	0.00041766	0.0063645	-//-
AFLA_102050	37.00405368	6.021087002	2.6196	5.66E-07	1.98E-05	-	P-loop containing nucleoside triphosphate hydrolase||RNA helicase, DEAD-box type, Q motif||ATP-dependent RNA helicase DEAD-box, conserved site||Helicase, C-terminal||DEAD/DEAH box helicase domain||Helicase superfamily 1/2, ATP-binding domain
AFLA_102200	463.8247915	240.4164629	0.94804	0.0015054	0.018312	-//-
AFLA_102400	2080.643485	617.3251664	1.7529	1.51E-11	1.25E-09	-//-
AFLA_102410	253.2490811	102.1982947	1.3092	1.87E-05	0.000455	-	Protein of unknown function DUF2945
AFLA_102710	18.63686544	83.84314685	-2.1695	1.03E-05	0.00027184	-	Protein of unknown function DUF1275
AFLA_102930	214.7880458	381.652983	-0.82935	0.0017862	0.020951	-	Histone-fold
AFLA_103090	543.5823959	891.2767551	-0.71337	0.0044991	0.04325	-//-
AFLA_103170	232.8757989	435.6282718	-0.90354	0.000653	0.0091542	-	Tetratricopeptide-like helical domain||Anaphase-promoting complex subunit 5
AFLA_103290	1851.484658	4888.175734	-1.4006	1.41E-08	7.02E-07	-	Histone H5||Winged helix-turn-helix DNA-binding domain||Linker histone H1/H5, domain H15
AFLA_103580	336.5579641	191.4257311	0.81407	0.0029551	0.031405	-	Six-bladed beta-propeller, TolB-like
AFLA_104360	10.5074109	1.743429205	2.5914	0.0044376	0.042787	-	CbxX/CfqX||P-loop containing nucleoside triphosphate hydrolase||ATPase, AAA-type, core||AAA+ ATPase domain
AFLA_104570	73.111277	23.86143163	1.6154	0.00022068	0.0037419	-	Protein of unknown function DUF1593
AFLA_104640	326.4100118	158.658097	1.0408	0.00043089	0.0065349	-	Hemolysin, aegerolysin type
AFLA_104700	87.2289824	45.46530902	0.94004	0.003943	0.039147	-	FAD/NAD(P)-binding domain||FAD-binding domain
AFLA_104820	210.7055369	104.8080594	1.0075	0.00037176	0.0057822	-	Cytochrome P450
AFLA_104870	143.7997304	39.44959289	1.866	3.59E-06	0.00010523	-//-
AFLA_104890	92.50228131	46.08839035	1.0051	0.0027806	0.03	-	Glycoside hydrolase, catalytic domain||Glycoside hydrolase, family 2, immunoglobulin-like beta-sandwich||Glycosyl hydrolases family 2, sugar binding domain||Glycoside hydrolase family 2, catalytic domain||Glycoside hydrolase, family 2/20, immunoglobulin-like beta-sandwich domain||Galactose-binding domain-like||Glycoside hydrolase superfamily
AFLA_104920	700.5890077	126.7779638	2.4663	3.22E-08	1.48E-06	-	Alpha/Beta hydrolase fold||Cutinase/acetylxylan esterase||Cutinase, monofunctional
AFLA_104960	11.62010457	2.047458351	2.5047	0.0038365	0.03841	-	S-adenosyl-L-methionine-dependent methyltransferase||O-methyltransferase, family 2||O-methyltransferase COMT-type||Winged helix-turn-helix DNA-binding domain
AFLA_104990	27.72648166	7.9317175	1.8056	0.0023225	0.025978	-	Domain of unknown function DUF2235
AFLA_105220	55.64093763	26.12805353	1.0905	0.0036636	0.037263	-	Short-chain dehydrogenase/reductase SDR||NAD(P)-binding domain
AFLA_105270	149.1948315	54.41681932	1.4551	5.09E-06	0.00014418	-//-
AFLA_105450	78.82139357	26.55999254	1.5693	1.58E-05	0.00039269	-	Polyketide synthase, enoylreductase domain||Beta-ketoacyl synthase, C-terminal||Malonyl-CoA ACP transacylase, ACP-binding||NAD(P)-binding domain||Phosphopantetheine attachment site||Polyketide synthase, ketoreductase domain||Polyketide synthase, acyl transferase domain||Thiolase-like||Alcohol dehydrogenase, C-terminal||Ketoacyl-synthetase, C-terminal extension||Acyl transferase domain||Phosphopan…
AFLA_105460	11.14552041	1.942961045	2.5201	0.0050456	0.047018	-//-
AFLA_105480	186.0905571	47.9934886	1.9551	0.00026949	0.0044492	-	Mss4-like||Glutathione-dependent formaldehyde-activating enzyme/centromere protein V
AFLA_105570	856.7438643	2990.030302	-1.8032	6.43E-05	0.0013027	-	Branched-chain amino acid aminotransferase II||Aminotransferase, class IV, conserved site||Aminotransferase class IV
AFLA_105610	1642.940657	5495.069354	-1.7419	0.0010464	0.013514	-	Dihydroxy-acid/6-phosphogluconate dehydratase||Aconitase/3-isopropylmalate dehydratase, swivel||Dihydroxy-acid/6-phosphogluconate dehydratase, conserved site||Dihydroxy-acid dehydratase
AFLA_105640	115.9631402	5.057376381	4.5191	4.22E-09	2.37E-07	-//-
AFLA_105730	86.5249683	25.59057197	1.7575	1.47E-06	4.75E-05	-	Alpha/beta hydrolase fold-1||Alpha/Beta hydrolase fold
AFLA_106010	40.99377384	17.53594839	1.2251	0.0041565	0.040628	-	Major facilitator superfamily domain||Major facilitator superfamily
AFLA_106020	61.92191272	13.08162653	2.2429	1.02E-07	4.27E-06	-	Major facilitator superfamily domain||Major facilitator superfamily
AFLA_106040	20.30352198	3.566353141	2.5092	0.00096689	0.01264	-//-
AFLA_106180	54.76117798	11.34766009	2.2708	0.00018788	0.0032814	-	Major facilitator superfamily||Major facilitator superfamily domain||Sugar transporter, conserved site
AFLA_106680	18.59658117	4.563645254	2.0268	0.0020404	0.023263	-	NodB homology domain||Chitin-binding, type 1||Glycoside hydrolase/deacetylase, beta/alpha-barrel
AFLA_106770	8.800507096	0.641639785	3.7778	0.0017809	0.020908	-	Amidohydrolase-related||Metal-dependent hydrolase||Amino-carboxymuconate-semialdehyde decarboxylase
AFLA_106850	2659.719254	414.4030107	2.6822	1.30E-24	3.97E-22	-	FAD/NAD(P)-binding domain||Pyridine nucleotide-disulphide oxidoreductase, class-II
AFLA_107020	183.7710716	89.94514091	1.0308	0.00036616	0.005702	-	Protein of unknown function DUF899, thioredoxin-like
AFLA_107090	15.67204019	2.60264252	2.5901	0.00076366	0.010476	-	Heterokaryon incompatibility
AFLA_107340	530.6246425	2771.169209	-2.3847	9.52E-10	5.99E-08	-	Voltage-dependent anion channel
AFLA_107420	133.6130338	52.54675921	1.3464	1.84E-05	0.00044895	-//-
AFLA_107470	694.5488189	1521.423789	-1.1313	0.0030277	0.031991	-//-
AFLA_107560	176.8481869	74.79139254	1.2416	2.23E-05	0.00052599	-	Isopenicillin N synthase-like||Oxoglutarate/iron-dependent dioxygenase||Non-haem dioxygenase N-terminal domain
AFLA_107590	577.5148548	177.7320995	1.7002	1.69E-05	0.00041537	-	Transketolase-like, pyrimidine-binding domain||Thiamin diphosphate-binding fold||Transketolase C-terminal/Pyruvate-ferredoxin oxidoreductase domain II||Transketolase, C-terminal domain||Transketolase family
AFLA_107610	11.85680173	1.656973588	2.8391	0.0018557	0.021627	-	NAD(P)-binding domain
AFLA_107620	26.67848421	8.295948745	1.6852	0.0020432	0.023263	-	Heterokaryon incompatibility
AFLA_107850	652.2346391	368.5457857	0.82355	0.0011742	0.014908	-	Acyltransferase 3
AFLA_107860	12047.6623	5263.628207	1.1946	2.13E-05	0.00050644	-//-
AFLA_107870	17.95847166	2.993127283	2.5849	0.00028484	0.004651	-	Alpha/Beta hydrolase fold||Epoxide hydrolase, N-terminal
AFLA_107980	302.9880907	19.47640755	3.9595	3.20E-32	1.46E-29	-//-
AFLA_107990	1044.728322	192.5606509	2.4397	8.23E-12	7.26E-10	-	Alpha/Beta hydrolase fold||Peptidase S10, serine carboxypeptidase
AFLA_108000	184.5079363	3.601185577	5.6791	6.02E-38	3.21E-35	-	Transferase||Chloramphenicol acetyltransferase-like domain
AFLA_108010	145.1406087	2.281822627	5.9911	3.68E-30	1.47E-27	-	Chloramphenicol acetyltransferase-like domain
AFLA_108020	100.8647069	2.40311068	5.3914	1.79E-26	6.18E-24	-//-
AFLA_108040	70.78355643	6.016628005	3.5564	0.00083625	0.011242	-//-
AFLA_108050	2143.487231	304.1777792	2.817	1.62E-26	5.77E-24	-	Heterokaryon incompatibility
AFLA_108060	27.68254527	6.724179829	2.0415	0.0021296	0.024094	-	Short-chain dehydrogenase/reductase SDR||NAD(P)-binding domain
AFLA_108090	109.3505215	18.8651412	2.5352	1.10E-11	9.38E-10	-	Protein of unknown function DUF4246
AFLA_108160	90.46225798	8.302909629	3.4456	2.99E-16	4.50E-14	-	Pectin lyase fold||Parallel beta-helix repeat||Glycoside hydrolase, family 28||Pectin lyase fold/virulence factor
AFLA_108210	60.19185086	10.60277395	2.5051	7.37E-09	3.89E-07	-	Uncharacterised protein family UPF0311||Outer membrane protein/outer membrane enzyme PagP, beta-barrel
AFLA_108220	255.5936788	139.5325437	0.87325	0.0017145	0.020353	-	Zn(2)-C6 fungal-type DNA-binding domain||Fungal transcription factor
AFLA_108250	50.82646157	223.9156297	-2.1393	9.50E-06	0.0002526	-	Major facilitator superfamily||Major facilitator superfamily domain
AFLA_108260	1075.50173	3133.789817	-1.5429	3.22E-05	0.0007192	-	Ammonium transporter||Ammonium transporter AmtB-like domain||Ammonium/urea transporter
AFLA_108310	282.4150481	29.34537615	3.2666	2.20E-24	6.53E-22	-	Zn(2)-C6 fungal-type DNA-binding domain||Fungal transcription factor
AFLA_108440	421.3710116	700.9469308	-0.73421	0.0047068	0.044708	-	Phenol hydroxylase, C-terminal dimerisation domain||FAD-binding domain||Thioredoxin-like fold||FAD/NAD(P)-binding domain
AFLA_108510	20.48161877	1.352944441	3.9202	0.0001118	0.0021051	-	Protein of unknown function DUF4291
AFLA_108610	16.23694089	2.298613373	2.8204	0.00026587	0.0043973	-	Cytochrome P450||Cytochrome P450, E-class, group IV
AFLA_108680	40.51300129	15.44990477	1.3908	0.0016883	0.020154	-	Cytochrome P450||Cytochrome P450, E-class, group I||Cytochrome P450, conserved site
AFLA_108690	956.746971	313.9861669	1.6074	3.03E-10	2.07E-08	-	Alpha/Beta hydrolase fold||Alpha/beta hydrolase fold-1
AFLA_108770	773.0714009	428.8439555	0.85015	0.0010746	0.013794	-	Amino acid/polyamine transporter I
AFLA_108810	960.2365152	1695.161039	-0.81996	0.00088507	0.011715	-	Pyridoxamine 5'-phosphate oxidase-like, FMN-binding domain||FMN-binding split barrel
AFLA_108830	685.9829609	369.1095768	0.89412	0.00045343	0.0067961	-	Calcineurin-like phosphoesterase domain, apaH type||Mre11, DNA-binding||Metallo-dependent phosphatase-like||DNA double-strand break repair protein Mre11
AFLA_108850	71.3922455	32.70932847	1.1261	0.0013136	0.016276	-	Alpha/beta hydrolase fold-1||Alpha/Beta hydrolase fold
AFLA_109430	1138.249142	1966.167696	-0.78857	0.0012433	0.0156	-	Polyketide synthase, phosphopantetheine-binding domain||AMP-binding enzyme C-terminal domain||Amino acid adenylation domain||Phosphopantetheine binding ACP domain||Phosphopantetheine attachment site||Condensation domain||AMP-binding, conserved site||AMP-dependent synthetase/ligase
AFLA_109480	1293.623002	288.1713013	2.1664	1.29E-16	2.04E-14	-	Glycoside hydrolase family 71
AFLA_109660	219.6046981	77.88599847	1.4955	0.00016648	0.002952	-	Pyridoxal phosphate-dependent transferase||Pyridoxal phosphate-dependent transferase, major region, subdomain 1||Pyridoxal phosphate-dependent transferase, major region, subdomain 2||Aminotransferase class V domain
AFLA_109770	91.14545673	22.16587277	2.0398	3.73E-08	1.69E-06	-	Protein kinase-like domain||Aminoglycoside phosphotransferase
AFLA_109780	252.1614996	32.22042343	2.9683	7.15E-09	3.80E-07	-	Ankyrin repeat||Ankyrin repeat-containing domain
AFLA_109800	294.2667688	9.517775272	4.9504	5.74E-22	1.50E-19	-	Dynamin central domain||Dynamin superfamily||Dynamin, GTPase domain||Dynamin-type guanine nucleotide-binding (G) domain||GTPase effector domain||P-loop containing nucleoside triphosphate hydrolase
AFLA_109980	54.67091695	112.6368977	-1.0428	0.00486	0.045746	-//-
AFLA_110050	961.7968747	3475.252642	-1.8533	0.00087102	0.011588	-	Cation-transporting P-type ATPase, C-terminal||P-type ATPase, transmembrane domain||P-type ATPase, cytoplasmic domain N||HAD-like domain||P-type ATPase, phosphorylation site||P-type ATPase, A domain||P-type ATPase, subfamily IID||P-type ATPase||Cation-transporting P-type ATPase, N-terminal
AFLA_110140	97.72534444	29.61261575	1.7225	1.15E-06	3.80E-05	-//-
AFLA_110150	297.9418235	90.73880928	1.7152	1.91E-09	1.14E-07	-//-
AFLA_110190	123.0423471	32.20826938	1.9337	7.96E-08	3.40E-06	-	Peptidase S1, PA clan||Serine proteases, trypsin domain||Peptidase S1A, chymotrypsin family
AFLA_110270	64.19985009	31.31745969	1.0356	0.005377	0.049209	-	Alpha/Beta hydrolase fold||Tannase/feruloyl esterase
AFLA_110510	7478.473916	3277.582708	1.1901	0.00048681	0.0071953	-	Ubiquitin 3 binding protein But2, C-terminal
AFLA_110980	1117.07999	276.3062964	2.0154	9.25E-15	1.23E-12	-	Prolyl 4-hydroxylase, alpha subunit||Oxoglutarate/iron-dependent dioxygenase
AFLA_110990	18.0389847	3.721222685	2.2773	0.00079725	0.010842	-	Short-chain dehydrogenase/reductase SDR||Short-chain dehydrogenase/reductase, conserved site||NAD(P)-binding domain
AFLA_111070	1510.920086	2738.325281	-0.85787	0.00055668	0.008042	-	Aldehyde dehydrogenase, glutamic acid active site||Aldehyde dehydrogenase N-terminal domain||Aldehyde dehydrogenase domain||Aldehyde dehydrogenase, C-terminal||Aldehyde/histidinol dehydrogenase
AFLA_111080	1822.698805	3823.025265	-1.0686	1.29E-05	0.000327	-	High mobility group protein HMGA||EVE domain||AT hook, DNA-binding motif||PUA-like domain
AFLA_111090	34.7969084	93.0588781	-1.4192	3.63E-05	0.00079984	-//-
AFLA_111100	3943.884878	7191.891411	-0.86675	0.00032016	0.005123	-	Thioredoxin-like fold||Peroxiredoxin, C-terminal||Alkyl hydroperoxide reductase subunit C/ Thiol specific antioxidant||Thioredoxin domain
AFLA_111270	309.0057805	787.0808998	-1.3489	4.60E-05	0.00097114	-//-
AFLA_111290	741.1310281	3904.65256	-2.3974	4.01E-10	2.70E-08	-//-
AFLA_111430	21.32105715	2.012625916	3.4051	3.23E-06	9.61E-05	-	Pyridoxal phosphate-dependent transferase, major region, subdomain 2||Pyridoxal phosphate-dependent transferase||Pyridoxal phosphate-dependent transferase, major region, subdomain 1||Aminotransferase, class I/classII
AFLA_111590	309.0618716	525.0616399	-0.76459	0.0033178	0.034599	-	NADP-dependent oxidoreductase domain||Aldo/keto reductase/potassium channel subunit beta
AFLA_112640	3196.031278	6736.364216	-1.0757	0.00013259	0.0024497	-	Acetolactate synthase, small subunit, C-terminal||Acetolactate synthase, small subunit||ACT domain
AFLA_112800	192.9388952	44.51750529	2.1157	1.95E-06	6.06E-05	-	Alpha-hydroxy acid dehydrogenase, FMN-dependent||FMN-dependent dehydrogenase||Aldolase-type TIM barrel
AFLA_113240	5000.280805	2734.112828	0.87094	0.00040698	0.0062365	-//-
AFLA_113320	8199.971953	31843.35407	-1.9573	4.54E-15	6.18E-13	-	Glutamate/phenylalanine/leucine/valine dehydrogenase||Leu/Phe/Val dehydrogenases active site||Glutamate/phenylalanine/leucine/valine dehydrogenase, dimerisation domain||Glutamate dehydrogenase||Glutamate/phenylalanine/leucine/valine dehydrogenase, C-terminal||NAD(P)-binding domain
AFLA_113330	50.87275917	120.9930368	-1.25	0.0013249	0.016351	-	Short-chain dehydrogenase/reductase SDR||NAD(P)-binding domain
AFLA_113350	436.0924075	221.347892	0.97832	0.00023103	0.0039019	-//-
AFLA_113450	1515.155459	2510.681766	-0.72861	0.0028814	0.030724	-	Basic-leucine zipper domain
AFLA_113460	131.9574262	241.7846244	-0.87365	0.0016744	0.020063	-	Centromere protein N||Centromere protein Chl4/mis15/CENP-N
AFLA_113540	278.7425752	70.75775119	1.978	1.12E-11	9.49E-10	-	Tyrosine specific protein phosphatases domain||Tyrosine/serine-protein phosphatase IphP-type||Protein-tyrosine phosphatase, active site||Protein-tyrosine phosphatase-like
AFLA_113800	2325.884154	5258.142941	-1.1768	1.48E-06	4.77E-05	-	Aminotransferase, class IV, conserved site||Branched-chain amino acid aminotransferase II||Aminotransferase class IV
AFLA_114100	15938.93234	7202.232975	1.146	0.0036834	0.037375	-	Protein of unknown function DUF1761
AFLA_114200	141.974298	72.66034755	0.96639	0.0015213	0.018453	-//-
AFLA_114210	61.05189251	5.89979895	3.3713	0.00050368	0.0074018	-//-
AFLA_114220	159.9119913	71.46871677	1.1619	0.0006934	0.009657	-//-
AFLA_114360	204.0658134	47.43650871	2.105	9.87E-12	8.53E-10	-	NACHT nucleoside triphosphatase||Nucleoside phosphorylase||WD40 repeat||P-loop containing nucleoside triphosphate hydrolase||Ankyrin repeat||WD40 repeat, conserved site||WD40/YVTN repeat-like-containing domain||WD40-repeat-containing domain||G-protein beta WD-40 repeat||Ankyrin repeat-containing domain||Nucleoside phosphorylase domain
AFLA_114530	134.9503895	260.5654331	-0.94922	0.00072779	0.01007	-	Alpha/Beta hydrolase fold||Alpha/beta hydrolase fold-1
AFLA_114840	593.8144438	1113.378987	-0.90686	0.0047681	0.045189	-	R3H-associated N-terminal domain||R3H domain
AFLA_115040	680.2121603	354.391726	0.94064	0.0019763	0.022775	-	6-phosphogluconate dehydrogenase, domain 2||3-hydroxyacyl-CoA dehydrogenase, conserved site||3-hydroxyacyl-CoA dehydrogenase, NAD binding||NAD(P)-binding domain||3-hydroxyacyl-CoA dehydrogenase||3-hydroxyacyl-CoA dehydrogenase, C-terminal||6-phosphogluconate dehydrogenase C-terminal domain-like
AFLA_115420	918.1726732	1699.55302	-0.88832	0.00033112	0.0052523	-	Regulator of chromosome condensation 1/beta-lactamase-inhibitor protein II||Regulator of chromosome condensation, RCC1
AFLA_115790	92.79383419	46.43921659	0.99869	0.0026236	0.028694	-	NAD(P)-binding domain||Short-chain dehydrogenase/reductase, conserved site||Short-chain dehydrogenase/reductase SDR
AFLA_115830	73.35904151	34.41133145	1.0921	0.0024268	0.026956	-	S-adenosyl-L-methionine-dependent methyltransferase
AFLA_115840	499.0680164	168.8763018	1.5633	0.00062266	0.0087866	-//-
AFLA_115850	160.8135797	45.39100746	1.8249	0.00012517	0.0023346	-//-
AFLA_115870	162.3717701	81.72334405	0.99048	0.00099613	0.012982	-	Proline racemase family
AFLA_115890	8.727298283	0.676472221	3.6894	0.001799	0.021074	-	Acyl-coenzyme A oxidase, N-terminal||Acyl-CoA dehydrogenase/oxidase, N-terminal and middle domain||Acyl-CoA oxidase||Acyl-CoA dehydrogenase/oxidase C-terminal||Acyl-CoA oxidase/dehydrogenase, central domain||Acyl-CoA oxidase, C-terminal||Acyl-CoA dehydrogenase/oxidase, N-terminal
AFLA_116000	1473.158334	647.9768956	1.1849	2.44E-06	7.41E-05	-	Phytanoyl-CoA dioxygenase
AFLA_116240	252.2897022	64.12216177	1.9762	5.11E-07	1.83E-05	-	Oxoglutarate/iron-dependent dioxygenase||Prolyl 4-hydroxylase, alpha subunit||Acylphosphatase-like domain
AFLA_116420	379.1800928	157.2631699	1.2697	2.12E-06	6.49E-05	-	Alpha/beta hydrolase fold-1||Alpha/Beta hydrolase fold
AFLA_116560	42.75188126	89.35262242	-1.0635	0.0019502	0.022503	-	NmrA-like domain||NAD(P)-binding domain
AFLA_116680	1239.884056	310.372923	1.9981	1.37E-12	1.36E-10	-	PAS-associated, C-terminal||PAS domain
AFLA_116790	33.54267608	12.31994963	1.445	0.0026811	0.029173	-	Sensitivity To Red Light Reduced-like, SRR1
AFLA_116810	8618.025639	3885.893062	1.1491	2.76E-06	8.30E-05	-	Starch synthase, catalytic domain
AFLA_116820	55.98374963	16.51115181	1.7616	2.28E-05	0.00053752	-	Phosphopantetheine-protein transferase domain||4'-phosphopantetheinyl transferase superfamily||NAD(P)-binding domain
AFLA_116940	65.84205767	26.77344615	1.2982	0.0003944	0.0060678	-//-
AFLA_116980	346.6482753	126.2243977	1.4575	0.00041434	0.0063214	-	Phosphatidylserine decarboxylase||Phosphatidylserine decarboxylase-related
AFLA_116990	337.4511694	129.3518952	1.3834	0.000169	0.0029885	-	Sugar transporter, conserved site||Major facilitator superfamily domain||Major facilitator, sugar transporter-like||Sugar/inositol transporter
AFLA_117010	26.82119422	9.828765304	1.4483	0.0043148	0.041791	-	Tail specific protease||ClpP/crotonase-like domain
AFLA_117040	245.2855957	120.0202305	1.0312	0.00068004	0.0094915	-	NAD(P)-binding domain
AFLA_117080	25.63279246	5.88175726	2.1237	0.0046365	0.044171	-	Major facilitator superfamily domain||Ferroporti-1
AFLA_117260	420.0566289	205.8091748	1.0293	0.0011825	0.014984	-	Acyl-CoA N-acyltransferase||GNAT domain
AFLA_117270	49.64171193	11.62418478	2.0944	3.22E-06	9.61E-05	-	F-box domain
AFLA_117370	53.86084352	111.3963396	-1.0484	0.0010594	0.013667	-	RmlC-like cupin domain||RmlC-like jelly roll fold||Cupin 2, conserved barrel
AFLA_117490	45.74234532	93.59510871	-1.0329	0.0020018	0.022974	-	Short-chain dehydrogenase/reductase SDR||Short-chain dehydrogenase/reductase, conserved site||NAD(P)-binding domain
AFLA_117580	63.22258069	8.887216292	2.8306	2.95E-10	2.03E-08	-	Cytochrome P450||Cytochrome P450, E-class, group I
AFLA_117730	304.3145455	144.1674882	1.0778	0.00010048	0.0019201	-	UmuC domain||DNA polymerase, Y-family, little finger domain||DNA polymerase type-Y, HhH motif
AFLA_117790	656.8934577	170.6013503	1.945	4.01E-13	4.39E-11	-	Peptidase C12, ubiquitin carboxyl-terminal hydrolase
AFLA_117970	17175.32705	4595.087084	1.9022	1.69E-05	0.00041537	-	Archaeal/bacterial/fungal rhodopsins
AFLA_117980	486.0795887	285.3582565	0.76842	0.0034417	0.035572	-	Major facilitator superfamily||Major facilitator superfamily domain
AFLA_118050	1565.385127	3568.941063	-1.189	1.30E-06	4.22E-05	-	Proton-dependent oligopeptide transporter family||Major facilitator superfamily domain||PTR2 family proton/oligopeptide symporter, conserved site
AFLA_118070	551.5235602	126.4132158	2.1253	5.99E-06	0.0001662	-	NmrA-like domain||Tryptophan synthase, beta chain||NAD(P)-binding domain||Tryptophan synthase beta subunit-like PLP-dependent enzyme||Tryptophan synthase beta chain/beta chain-like
AFLA_118240	78.72740642	33.36812609	1.2384	0.00047362	0.0070491	-	CoA-transferase family III domain||CoA-transferase family III
AFLA_118380	323.2427603	172.3153179	0.90757	0.00088058	0.011691	-//-
AFLA_118400	106.3465279	218.1882695	-1.0368	0.00029497	0.004804	-//-
AFLA_118420	894.7384408	383.4731994	1.2223	1.64E-06	5.26E-05	-	Cyanovirin-N
AFLA_118500	4296.835806	399.0251154	3.4287	0.00015294	0.0027813	-//-
AFLA_118650	5.124363524	0	Inf	0.0053385	0.048961	-//-
AFLA_118670	366.4854852	215.574034	0.76557	0.0038155	0.03838	-	Beta-lactamase/transpeptidase-like||Beta-lactamase-related||D-aminopeptidase, domain B/C||D-aminopeptidase, domain B||D-aminopeptidase/lipoprotein domain
AFLA_118720	28.04617262	9.448110401	1.5697	0.0025533	0.028069	-	NTF2-like domain||FAD/NAD(P)-binding domain
AFLA_118780	460.2748494	137.2283421	1.7459	6.60E-11	5.02E-09	-//-
AFLA_118970	28.06812231	4.970920764	2.4973	1.55E-05	0.00038698	-	FAD/NAD(P)-binding domain||FAD-binding domain||FAD-dependent oxidoreductase 2, FAD binding domain
AFLA_119030	289.3758929	90.7982772	1.6722	3.33E-09	1.89E-07	-	F-box domain||Leucine-rich repeat domain, L domain-like
AFLA_119050	49.53307932	7.390822189	2.7446	4.53E-05	0.00095958	-//-
AFLA_119200	28.32684317	59.64213117	-1.0742	0.0053495	0.049027	-//-
AFLA_119210	2667.638388	5350.048855	-1.004	3.98E-05	0.00086496	-//-
AFLA_119340	632.9015278	2513.143237	-1.9894	4.21E-07	1.52E-05	-	Myc-type, basic helix-loop-helix (bHLH) domain
AFLA_119350	83.27583889	226.2965014	-1.4422	5.88E-07	2.05E-05	-	FAD/NAD(P)-binding domain||FAD-binding domain
AFLA_119440	142.5209196	244.9865406	-0.78153	0.0049303	0.046247	-	G-patch domain
AFLA_119550	2436.313378	4461.49579	-0.87283	0.0026788	0.029172	-	Pentatricopeptide repeat||Tetratricopeptide-like helical domain
AFLA_119810	496.2101657	300.7114924	0.72257	0.0053265	0.048886	-	Histidine kinase-like ATPase, C-terminal domain||Signal transduction histidine kinase, dimerisation/phosphoacceptor domain||Signal transduction histidine kinase-related protein, C-terminal||CheY-like superfamily||Histidine kinase domain||HAMP domain||Signal transduction response regulator, receiver domain
AFLA_120150	83.16488207	36.21263855	1.1995	0.00055501	0.008027	-//-
AFLA_120170	640.050438	295.7123773	1.114	0.00034427	0.0054206	-	NAD(P)-binding domain||NmrA-like domain
AFLA_120250	78.09665665	30.23817096	1.3689	0.00015416	0.0027978	-	Peptidase M20, dimerisation domain||Peptidase M20||ArgE/DapE/ACY1/CPG2/YscS, conserved site
AFLA_120370	320.9676083	163.6758755	0.97159	0.00034482	0.0054226	-	Heterokaryon incompatibility
AFLA_120570	1208.688201	647.6484458	0.90016	0.00031829	0.0050995	-	Short-chain dehydrogenase/reductase SDR||NAD(P)-binding domain||Short-chain dehydrogenase/reductase, conserved site
AFLA_120660	56.96476366	6.474275752	3.1373	1.54E-07	6.21E-06	-//-
AFLA_121130	25.7487108	5.88175726	2.1302	0.0031451	0.033067	-//-
AFLA_121140	19.73491365	4.831591022	2.0302	0.0017218	0.020401	-	Class I glutamine amidotransferase-like
AFLA_121190	85.05724241	23.49720038	1.8559	4.12E-07	1.50E-05	-	Polyketide synthase, enoylreductase domain||GroES-like||NAD(P)-binding domain||Quinone oxidoreductase/zeta-crystallin, conserved site||Alcohol dehydrogenase superfamily, zinc-type
AFLA_121220	143.1383704	318.0966957	-1.1521	3.15E-05	0.00070536	-	Major facilitator superfamily||Major facilitator superfamily domain
AFLA_121240	615.8972985	3466.134067	-2.4926	0.001994	0.022905	-	Phosphate transporter
AFLA_121250	3557.588768	442.4553033	3.0073	1.75E-30	7.45E-28	-	E3 ubiquitin ligase RBR family||von Willebrand factor, type A||Zinc finger, RING-type
AFLA_121260	6266.198519	1112.29729	2.494	9.01E-23	2.56E-20	-	Aspartic peptidase domain||Aspartic peptidase, active site||Peptidase family A1 domain||Aspartic peptidase A1 family
AFLA_121270	65.462595	22.48024855	1.542	4.19E-05	0.00089625	-//-
AFLA_121330	701.4176207	1674.492863	-1.2554	5.25E-07	1.87E-05	-	S-adenosyl-L-methionine-dependent methyltransferase
AFLA_121370	189.534753	373.4417828	-0.97842	0.00021855	0.0037253	-	Glycoside hydrolase superfamily||X8 domain||Glucanosyltransferase||Glycoside hydrolase, catalytic domain
AFLA_121390	47.6676487	165.08562	-1.7921	1.20E-08	6.06E-07	-	N2227-like||S-adenosyl-L-methionine-dependent methyltransferase
AFLA_121450	109.4577892	48.1937266	1.1835	0.00028778	0.004693	-	Glyoxalase/Bleomycin resistance protein/Dihydroxybiphenyl dioxygenase||Glyoxalase/fosfomycin resistance/dioxygenase domain
AFLA_121570	588.6080657	1347.822593	-1.1953	1.70E-06	5.43E-05	-//-
AFLA_121720	135.3737515	40.5960446	1.7375	8.15E-08	3.47E-06	-//-
AFLA_121730	197.0943909	52.34259068	1.9128	4.81E-10	3.18E-08	-	Glycosyl hydrolase family 36, N-terminal||Glycoside hydrolase superfamily||Glycoside hydrolase family 27/36, conserved site||Aldolase-type TIM barrel||Glycoside hydrolase family 36||Glycosyl hydrolase family 36, C-terminal
AFLA_122140	164.3886724	84.06659171	0.96751	0.00095944	0.012581	-	Acyl-CoA N-acyltransferase||GNAT domain
AFLA_122470	4.383772776	26.0843031	-2.5729	2.61E-05	0.00060506	-	CobW/HypB/UreG, nucleotide-binding domain||Cobalamin (vitamin B12) biosynthesis CobW-like, C-terminal||P-loop containing nucleoside triphosphate hydrolase
AFLA_123310	124.5967004	17.88338889	2.8006	1.47E-14	1.90E-12	-	YrdC-like domain||DHBP synthase RibB-like alpha/beta domain
AFLA_123330	35.72297419	3.463106779	3.3667	1.19E-08	6.01E-07	-	Alpha/Beta hydrolase fold||Carboxylesterase, type B
AFLA_123340	21.11728453	6.170246605	1.775	0.0034602	0.035669	-//-
AFLA_123370	39.97006879	8.283616996	2.2706	1.26E-05	0.00032214	-//-
AFLA_123420	63.23724466	17.65885447	1.8404	6.05E-06	0.00016733	-	Leucine-rich repeat domain, L domain-like
AFLA_123500	191.4939858	551.7434958	-1.5267	0.0017137	0.020353	-	Zn(2)-C6 fungal-type DNA-binding domain||Transcription factor domain, fungi
AFLA_123580	735.5191941	173.9675942	2.0799	7.08E-15	9.53E-13	-//-
AFLA_123590	278.7557447	61.74085732	2.1747	3.89E-05	0.00084926	-	Glutathione S-transferase, C-terminal-like||Glutathione S-transferase, N-terminal||Thioredoxin-like fold
AFLA_123690	165.3891639	66.82557678	1.3074	1.69E-05	0.00041537	-	Glycoside hydrolase, family 43||Glycosyl hydrolase, five-bladed beta-propellor domain||Glycoside hydrolase, family 43, endo-1, 5-alpha-L-arabinosidase
AFLA_123880	4302.742454	1500.530183	1.5198	3.74E-06	0.00010907	-	Peptidase S58, DmpA||ArgJ-like domain
AFLA_123890	605.8058429	28.59066014	4.4052	0.00076672	0.010495	-//-
AFLA_123900	19.36644434	1.708596769	3.5027	5.84E-06	0.00016257	-	RTA-like protein
AFLA_123910	11.88976327	1.994584226	2.5756	0.0030849	0.032568	-	RTA-like protein
AFLA_124060	397.1021259	99.29409686	1.9997	6.00E-13	6.51E-11	-	Beta-lactamase/transpeptidase-like||Beta-lactamase-related
AFLA_124190	319.093675	166.551435	0.93801	0.0026174	0.02866	-	Glycoside hydrolase family 15/Phosphorylase b kinase regulatory chain family||Six-hairpin glycosidase||Six-hairpin glycosidase-like
AFLA_124200	638.3194155	235.9730324	1.4357	4.23E-08	1.91E-06	-	Conserved hypothetical protein CHP02231||Domain of unknown function DUF4140
AFLA_124210	291.1410185	117.0370945	1.3148	2.43E-06	7.39E-05	-	Heterokaryon incompatibility
AFLA_124330	66.04462193	25.57662219	1.3686	0.0010047	0.013067	-	Short-chain dehydrogenase/reductase SDR||NAD(P)-binding domain||Short-chain dehydrogenase/reductase, conserved site
AFLA_124590	18.29034582	3.937545271	2.2157	0.0010619	0.013686	-	Metal-dependent hydrolase||Metal-dependent hydrolase, composite domain||Amidohydrolase-related
AFLA_124820	760.7374787	305.0103602	1.3185	2.37E-07	9.11E-06	-	FAD/NAD(P)-binding domain||Pyridine nucleotide-disulphide oxidoreductase, class-II
AFLA_124830	25.46811427	4.633310125	2.4586	4.34E-05	0.00092545	-//-
AFLA_124840	11.92270631	0.355652328	5.0671	3.02E-05	0.00068043	-//-
AFLA_125100	19.23103856	5.361405527	1.8428	0.0029649	0.031483	-	Thiamine pyrophosphate enzyme, N-terminal TPP-binding domain||Thiamine pyrophosphate enzyme, C-terminal TPP-binding||Thiamin diphosphate-binding fold||DHS-like NAD/FAD-binding domain
AFLA_125250	13.53078099	2.246990192	2.5902	0.0017347	0.020479	-	NAD(P)-binding domain||NAD-dependent epimerase/dehydratase, N-terminal domain
AFLA_125270	33.28397372	5.189745238	2.6811	2.77E-06	8.30E-05	-	Uncharacterised domain, di-copper centre||Tyrosinase copper-binding domain
AFLA_125320	7.366895601	0	Inf	0.00044347	0.006686	-	Metallo-beta-lactamase
AFLA_125420	219.3767626	93.64761574	1.2281	1.96E-05	0.00047209	-//-
AFLA_125470	41.34390857	12.71293628	1.7014	0.00019122	0.0033261	-	NTF2-like domain
AFLA_125490	12.58641763	0.355652328	5.1453	1.60E-05	0.00039689	-	Major facilitator superfamily domain||Major facilitator superfamily
AFLA_125500	13.58567373	1.743429205	2.9621	0.00045909	0.0068568	-	Major facilitator superfamily domain
AFLA_125510	109.1380058	3.209449869	5.0877	1.46E-13	1.67E-11	-	Major facilitator superfamily domain
AFLA_125520	38.7841663	9.633353384	2.0094	4.02E-05	0.00086958	-	FAD linked oxidase, N-terminal||FAD-binding, type 2||FAD-binding, type 2, subdomain 1
AFLA_125660	396.7371791	84.25952975	2.2353	6.60E-14	7.96E-12	-	P-type ATPase, transmembrane domain||P-type ATPase, cytoplasmic domain N||HAD-like domain||P-type ATPase, A domain||P-type ATPase, phosphorylation site||P-type ATPase||Cation-transporting P-type ATPase, N-terminal||Cation-transporting P-type ATPase, C-terminal
AFLA_125730	6.514038628	0	Inf	0.001226	0.015446	-	Serine protease inhibitor
AFLA_125910	1454.562363	282.753084	2.363	1.17E-15	1.67E-13	-	Protein kinase, ATP binding site||Serine/threonine-protein kinase, active site||Protein kinase-like domain||Protein kinase domain
AFLA_125940	16.3321179	2.23145039	2.8717	0.00043366	0.0065614	-	Polyketide synthase, enoylreductase domain||GroES-like||NAD(P)-binding domain||Alcohol dehydrogenase, C-terminal||Alcohol dehydrogenase superfamily, zinc-type
AFLA_126020	804.4797904	366.7578556	1.1332	8.44E-06	0.00022674	-	Methyltransferase type 11||S-adenosyl-L-methionine-dependent methyltransferase
AFLA_126130	26.86876422	1.066956984	4.6544	1.61E-09	9.73E-08	-	TPP-binding enzyme, conserved site||Thiamine pyrophosphate enzyme, N-terminal TPP-binding domain||Thiamine pyrophosphate enzyme, central domain||Thiamine pyrophosphate (TPP)-dependent enzyme||Thiamin diphosphate-binding fold||Thiamine pyrophosphate enzyme, C-terminal TPP-binding||DHS-like NAD/FAD-binding domain
AFLA_126140	27.3824613	9.484193781	1.5297	0.0033553	0.034876	-	Sensitivity To Red Light Reduced-like, SRR1
AFLA_126180	12.19234651	0.624849039	4.2863	8.97E-05	0.0017374	-	Sugar transporter, conserved site||Major facilitator superfamily domain||Major facilitator, sugar transporter-like
AFLA_126190	73.95319613	1.336153695	5.7905	1.37E-22	3.82E-20	-	6-phosphogluconate dehydrogenase, domain 2||Ketopantoate reductase, C-terminal domain||6-phosphogluconate dehydrogenase C-terminal domain-like
AFLA_126210	127.0795263	29.65636618	2.0993	4.82E-10	3.18E-08	-	P-loop containing nucleoside triphosphate hydrolase
AFLA_126220	8.14042939	0	Inf	0.00020934	0.0035877	-//-
AFLA_126240	179.3260327	11.27066725	3.9919	1.20E-19	2.59E-17	-//-
AFLA_126470	46.41337936	18.32799872	1.3405	0.0013929	0.017123	-//-
AFLA_126480	67.54527235	25.62736152	1.3982	0.00018578	0.0032492	-	OTT_1508-like deaminase
AFLA_126510	158.5370257	86.58136628	0.87269	0.003136	0.033033	-	HAD-like domain||Heavy metal-associated domain, HMA||P-type ATPase||P-type ATPase, A domain
AFLA_126630	51.76100294	15.87076297	1.7055	6.18E-05	0.0012611	-//-
AFLA_126640	23.64041315	2.551019338	3.2121	2.24E-05	0.00052942	-//-
AFLA_126960	14.49342343	1.066956984	3.7638	3.57E-05	0.00078929	-	GroES-like
AFLA_126970	1100.185989	241.7578917	2.1861	4.73E-14	5.76E-12	-	Amino acid/polyamine transporter I||Amino acid permease/ SLC12A domain
AFLA_126980	234.1763573	106.4298335	1.1377	0.00054265	0.007866	-//-
AFLA_126990	34.02825359	4.581686944	2.8928	3.10E-07	1.17E-05	-	Transcription factor domain, fungi||Zn(2)-C6 fungal-type DNA-binding domain
AFLA_127110	878.2513486	497.971232	0.81857	0.0010796	0.013844	-	Major facilitator superfamily||Major facilitator superfamily domain
AFLA_127270	93.87475618	31.26046564	1.5864	5.26E-06	0.00014858	-	Dimeric alpha-beta barrel
AFLA_127290	91.5249194	44.89245025	1.0277	0.0018626	0.021668	-	Metal-dependent hydrolase
AFLA_127670	355.0740607	171.0282855	1.0539	0.00038602	0.0059677	-	Alcohol dehydrogenase superfamily, zinc-type||NAD(P)-binding domain||Polyketide synthase, enoylreductase domain||GroES-like
AFLA_127780	90.84296601	44.27959389	1.0367	0.0025561	0.028075	-//-
AFLA_128060	49.01340591	15.24554684	1.6848	5.12E-05	0.0010685	-	Ketoacyl-synthetase, C-terminal extension||Acyl transferase domain||Acyl transferase||Phosphopantetheine binding ACP domain||Polyketide synthase, beta-ketoacyl synthase domain||Polyketide synthase, dehydratase domain||Acyl transferase/acyl hydrolase/lysophospholipase||GroES-like||S-adenosyl-L-methionine-dependent methyltransferase||Beta-ketoacyl synthase, N-terminal||Beta-ketoacyl synthase, activ…
AFLA_128180	110.336285	49.95019372	1.1433	0.00040518	0.0062187	-//-
AFLA_128510	717.5437443	149.299884	2.2649	8.63E-17	1.40E-14	-	6-phosphogluconate dehydrogenase, C-terminal||6-phosphogluconate dehydrogenase, domain 2||6-phosphogluconate dehydrogenase C-terminal domain-like||6-phosphogluconate dehydrogenase||6-phosphogluconate dehydrogenase, decarboxylating||NAD(P)-binding domain||6-phosphogluconate dehydrogenase, NADP-binding
AFLA_128520	762.9703368	102.7811727	2.8921	6.26E-25	1.95E-22	-	Xylose isomerase-like, TIM barrel domain
AFLA_128600	606.6874072	185.2029775	1.7118	0.0012817	0.015971	-	Dehydrogenase, E1 component||Thiamin diphosphate-binding fold
AFLA_128710	53.80222466	18.68114916	1.5261	0.00017277	0.0030468	-	Zn(2)-C6 fungal-type DNA-binding domain
AFLA_129220	26.54057918	8.909716979	1.5747	0.0030117	0.031875	-//-
AFLA_129230	180.4840647	24.51628702	2.8801	1.08E-17	1.97E-15	-	FAD-binding, type 2, subdomain 1||Berberine/berberine-like||CO dehydrogenase flavoprotein-like, FAD-binding, subdomain 2||FAD-binding, type 2||FAD linked oxidase, N-terminal
AFLA_129250	1573.687136	862.7735892	0.86709	0.00038685	0.0059733	-	Glucose-methanol-choline oxidoreductase, C-terminal||Glucose-methanol-choline oxidoreductase||Glucose-methanol-choline oxidoreductase, N-terminal||FAD/NAD(P)-binding domain
AFLA_129420	67.296429	30.09526607	1.161	0.0015033	0.018304	-	Zn(2)-C6 fungal-type DNA-binding domain||Transcription factor domain, fungi
AFLA_129430	135.1490896	240.6563757	-0.83242	0.0028118	0.03026	-	Sodium/calcium exchanger membrane region
AFLA_129840	694.2336554	259.0811604	1.422	4.68E-08	2.10E-06	-//-
AFLA_129860	2672.872262	1360.011845	0.97477	0.0043257	0.041865	-	Concanavalin A-like lectin/glucanase domain||Protein of unknown function DUF1349
AFLA_130040	2612.451642	7119.051314	-1.4463	5.13E-06	0.00014499	-	Ammonium transporter||Ammonium transporter, conserved site||Ammonium/urea transporter||Ammonium transporter AmtB-like domain
AFLA_130350	784.1589757	1503.405185	-0.93902	0.0048292	0.045532	-	Tetratricopeptide, SHNi-TPR domain||Tetratricopeptide-like helical domain
AFLA_130420	45.14081246	116.9853099	-1.3738	2.50E-05	0.00058222	-	S-adenosyl-L-methionine-dependent methyltransferase||Ribosomal RNA methyltransferase FtsJ domain||Ribosomal RNA large subunit methyltransferase E
AFLA_131200	834.6204336	272.6958655	1.6138	2.35E-06	7.15E-05	-	Nucleotide-binding alpha-beta plait domain||YTH domain||RNA recognition motif domain
AFLA_131250	2681.747034	1265.193024	1.0838	1.10E-05	0.00028814	-	Leucine-rich repeat, cysteine-containing subtype||Leucine-rich repeat domain, L domain-like
AFLA_131310	679.7919977	4543.169651	-2.7405	1.65E-11	1.35E-09	-//-
AFLA_131580	414.5019407	216.5264419	0.93684	0.00033614	0.0053132	-	AAA+ ATPase domain||ATPase, AAA-type, conserved site||P-loop containing nucleoside triphosphate hydrolase||BCS1, N-terminal||ATPase, AAA-type, core
AFLA_131600	24.8629478	8.210744072	1.5984	0.0048163	0.045511	-//-
AFLA_131640	718.0584348	1225.312039	-0.77098	0.0021806	0.024562	-	Myc-type, basic helix-loop-helix (bHLH) domain
AFLA_131810	140.222342	242.0861796	-0.7878	0.0038894	0.038757	-	Major facilitator superfamily domain||Thioredoxin-like fold||FAD/NAD(P)-binding domain||FAD-binding domain||Major facilitator superfamily
AFLA_131930	141.4610251	7.638769158	4.2109	0.00021882	0.0037253	-//-
AFLA_132030	1013.394093	438.4057312	1.2089	0.00057601	0.0082374	-	Carbon-nitrogen hydrolase
AFLA_132470	104.9751503	6.022337946	4.1236	2.18E-21	5.46E-19	-//-
AFLA_132480	116.4172506	33.5328255	1.7957	1.84E-06	5.77E-05	-	DNA glycosylase
AFLA_132510	275.7739128	75.52022212	1.8686	5.51E-06	0.00015403	-	MHYT domain
AFLA_132630	1245.693387	2053.698155	-0.72128	0.003398	0.035262	-	Transcription regulator HTH, APSES-type DNA-binding domain||KilA, N-terminal/APSES-type HTH, DNA-binding
AFLA_132750	30.19838816	5.576477169	2.437	1.36E-05	0.00034257	-	Six-hairpin glycosidase-like
AFLA_132980	85.82350898	336.282257	-1.9702	4.08E-05	0.00087877	-	Fork head domain||Winged helix-turn-helix DNA-binding domain||Fork head domain conserved site 2
AFLA_133020	2425.591207	3917.113713	-0.69145	0.0043877	0.042369	-	SANT/Myb domain||Myb-like domain||Homeodomain-like||Myb domain
AFLA_133140	177.2337369	99.84198107	0.82793	0.0044576	0.042915	-	Alpha/Beta hydrolase fold||Alpha/beta hydrolase fold-1
AFLA_133430	32.14936736	6.037877748	2.4127	2.79E-05	0.00063683	-//-
AFLA_133460	3155.159765	1180.779772	1.418	1.31E-08	6.55E-07	-	Ku70/Ku80, N-terminal alpha/beta||von Willebrand factor, type A||Ku70/Ku80 beta-barrel domain||Ku80||SPOC-like, C-terminal domain||Ku, C-terminal||Ku70/Ku80 C-terminal arm
AFLA_133780	32.48854575	9.076918272	1.8397	0.00029991	0.0048782	-//-
AFLA_133800	428.4327507	1074.456021	-1.3265	1.74E-07	6.92E-06	-	Leucine-rich repeat||Leucine-rich repeat domain, L domain-like||Leucine-rich repeat, typical subtype
AFLA_133810	306.3716851	697.2547299	-1.1864	5.38E-06	0.00015112	-//-
AFLA_133830	370.3054831	615.6105578	-0.7333	0.0044481	0.042855	-	Alcohol dehydrogenase, C-terminal||Alcohol dehydrogenase superfamily, zinc-type||NAD(P)-binding domain||Alcohol dehydrogenase, zinc-type, conserved site||Polyketide synthase, enoylreductase domain||Alcohol dehydrogenase, N-terminal||GroES-like
AFLA_134250	153.3773309	271.4734988	-0.82373	0.0027112	0.029425	-	Methyltransferase type 11||S-adenosyl-L-methionine-dependent methyltransferase
AFLA_134520	165.087863	302.8295438	-0.87527	0.0013047	0.016211	-	NAD(P)-binding domain||CoA-binding
AFLA_135290	24.1333504	8.477071807	1.5094	0.0048052	0.045473	-//-
AFLA_135480	57.88462256	24.31300234	1.2515	0.0012416	0.015593	-	Post-SET domain
AFLA_135610	20.51944079	2.654265701	2.9506	3.03E-05	0.00068196	-//-
AFLA_135700	13600.65222	3674.695185	1.888	4.14E-07	1.51E-05	-	Cerato-platanin||RlpA-like protein, double-psi beta-barrel domain
AFLA_135820	1034.861144	1784.718684	-0.78626	0.0052228	0.048121	-	P-loop containing nucleoside triphosphate hydrolase||CobW/HypB/UreG, nucleotide-binding domain||Urease accessory protein UreG
AFLA_136060	196.6684186	77.06894557	1.3515	5.06E-06	0.00014377	-	Ankyrin repeat||Ankyrin repeat-containing domain
AFLA_136090	225.8029654	477.1735442	-1.0794	4.31E-05	0.00092063	-	Major facilitator superfamily domain||Nodulin-like
AFLA_136100	731.5573075	1393.194247	-0.92935	0.00019299	0.0033478	-	Zinc finger, NHR/GATA-type||Zinc finger, GATA-type
AFLA_136170	42.46029137	14.8791808	1.5128	0.00055777	0.0080486	-	FAD/NAD(P)-binding domain||L-lysine 6-monooxygenase/L-ornithine 5-monooxygenase
AFLA_136250	92.03978784	35.31160391	1.3821	0.00082751	0.01116	-//-
AFLA_136380	62.59294676	22.04546857	1.5055	0.00010143	0.0019311	-//-
AFLA_136670	26.07329924	8.399195107	1.6343	0.0027054	0.029387	-	FAD linked oxidase, N-terminal||Berberine/berberine-like||FAD-binding, type 2||CO dehydrogenase flavoprotein-like, FAD-binding, subdomain 2
AFLA_136890	89.69112241	45.70058517	0.97275	0.0038345	0.03841	-	FAD-binding domain||FAD/NAD(P)-binding domain
AFLA_137130	171.7725832	82.62648548	1.0558	0.00032669	0.0051949	-	Major facilitator superfamily||Major facilitator superfamily domain
AFLA_137140	80.2049543	38.89423103	1.0441	0.0026684	0.029108	-	Ribonuclease E inhibitor RraA/RraA-like protein
AFLA_137150	348.1716682	144.7746346	1.266	3.71E-06	0.00010865	-	Zn(2)-C6 fungal-type DNA-binding domain||Transcription factor domain, fungi
AFLA_137320	259.3895594	649.9017142	-1.3251	3.47E-07	1.28E-05	-	Zinc finger C2H2-type/integrase DNA-binding domain||Zinc finger, C2H2-like||Zinc finger, C2H2
AFLA_137420	601.5545582	289.8188167	1.0535	4.96E-05	0.0010359	-	Methyltransferase type 11||S-adenosyl-L-methionine-dependent methyltransferase
AFLA_137560	7154.640838	1711.734826	2.0634	1.65E-16	2.58E-14	-	Cyanovirin-N
AFLA_137600	255.6646374	112.1249518	1.1891	2.20E-05	0.00052168	-	Metallo-beta-lactamase
AFLA_137760	90.35252802	25.99247662	1.7975	3.68E-05	0.00080788	-	Peptidase M3A/M3B||Metallopeptidase, catalytic domain||Neurolysin/Thimet oligopeptidase, domain 2||Neurolysin/Thimet oligopeptidase, N-terminal
AFLA_137770	133.0127833	52.81452729	1.3326	2.74E-05	0.00062595	-	S-adenosyl-L-methionine-dependent methyltransferase
AFLA_137920	1008.344577	337.8071051	1.5777	1.28E-08	6.43E-07	-	Major facilitator superfamily||Major facilitator superfamily domain
AFLA_137930	29.39196684	5.744929406	2.3551	3.44E-05	0.00076118	-	Aldehyde dehydrogenase N-terminal domain||Aldehyde dehydrogenase domain||Aldehyde dehydrogenase, cysteine active site||Aldehyde/histidinol dehydrogenase||Aldehyde dehydrogenase NAD(P)-dependent||Aldehyde dehydrogenase, C-terminal
AFLA_137980	997.457575	1627.600879	-0.70642	0.0042444	0.041298	-	Oxidoreductase FAD/NAD(P)-binding||Oxidoreductase, FAD-binding domain||Flavoprotein pyridine nucleotide cytochrome reductase||Ferredoxin reductase-type FAD-binding domain||Riboflavin synthase-like beta-barrel||NADH:cytochrome b5 reductase (CBR)
AFLA_138000	1598.307013	2805.89281	-0.81192	0.00091581	0.012096	-	Structural maintenance of chromosomes protein||Structural maintenance of chromosomes protein 3||RecF/RecN/SMC, N-terminal||P-loop containing nucleoside triphosphate hydrolase||SMCs flexible hinge
AFLA_138040	135.583768	30.0858033	2.172	0.0010296	0.013351	-	Pre-ATP-grasp domain||ATP-grasp fold, subdomain 2||D-alanine--D-alanine ligase, C-terminal||ATP-grasp fold||ATP-grasp fold, subdomain 1
AFLA_138100	49.85644089	22.15604291	1.1701	0.003843	0.03844	-//-
AFLA_138170	207.7908635	14.35311913	3.8557	1.31E-15	1.85E-13	-	Pectin lyase fold/virulence factor||Glycoside hydrolase, family 28||Pectin lyase fold
AFLA_138240	174.3323255	12.47732106	3.8045	5.89E-25	1.88E-22	-	Mannan endo-1,6-alpha-mannosidase||Six-hairpin glycosidase-like||Six-hairpin glycosidase||Glycoside hydrolase, family 76
AFLA_138250	20.50356847	0.355652328	5.8493	0.00013097	0.0024233	-//-
AFLA_138290	92.10207731	21.65873664	2.0883	6.85E-08	2.98E-06	-//-
AFLA_138320	153.6908705	66.93113563	1.1993	6.91E-05	0.0013842	-	Alpha/beta hydrolase fold-1||Alpha/Beta hydrolase fold
AFLA_138400	836.2436163	34.4613366	4.6009	5.40E-50	4.93E-47	-	P-loop containing nucleoside triphosphate hydrolase
AFLA_138590	1051.025992	85.90041876	3.613	1.09E-36	5.59E-34	-	DJ-1/PfpI||Class I glutamine amidotransferase-like
AFLA_138600	21.63098162	3.245533249	2.7366	0.00045569	0.006822	-	Crotonase superfamily||ClpP/crotonase-like domain||Enoyl-CoA hydratase/isomerase, conserved site
AFLA_138640	995.4954943	2556.36076	-1.3606	1.02E-05	0.00026885	-	Amino acid/polyamine transporter I
AFLA_138720	3902.145445	1987.159884	0.97356	7.89E-05	0.0015548	-	AMP-dependent synthetase/ligase
AFLA_138800	118.399798	44.69166747	1.4056	1.18E-05	0.00030648	-	Peptidase M54, archaemetzincin
AFLA_138920	3.096578908	126.6415917	-5.3539	0.00034654	0.0054428	-	FAD/NAD(P)-binding domain||Flavin monooxygenase-like
AFLA_139140	6.054081424	227.5678372	-5.2322	1.14E-08	5.83E-07	-	NADH:flavin oxidoreductase/NADH oxidase, N-terminal||Aldolase-type TIM barrel
AFLA_139150	19.59952638	5878.281738	-8.2284	4.06E-11	3.17E-09	-	Domain of unknown function DUF4243
AFLA_139160	20.53654851	4896.551178	-7.8974	3.77E-12	3.52E-10	-	NAD(P)-binding domain
AFLA_139170	25.19732122	5877.395898	-7.8658	3.46E-07	1.28E-05	-	FAD/NAD(P)-binding domain
AFLA_139180	23.0743596	5741.953504	-7.9591	3.65E-08	1.67E-06	-	Cytochrome P450||Cytochrome P450, E-class, group I||Cytochrome P450, conserved site
AFLA_139190	73.99853444	15311.10373	-7.6929	5.56E-07	1.95E-05	-	Glucose-methanol-choline oxidoreductase||Glucose-methanol-choline oxidoreductase, N-terminal||FAD/NAD(P)-binding domain||Glucose-methanol-choline oxidoreductase, C-terminal
AFLA_139200	15.09495629	2942.71097	-7.6069	1.50E-08	7.39E-07	-	Cytochrome P450, E-class, group I||Cytochrome P450, conserved site||Cytochrome P450
AFLA_139210	32.65939383	8171.580129	-7.967	5.45E-07	1.92E-05	-	O-methyltransferase, family 2||S-adenosyl-L-methionine-dependent methyltransferase||Winged helix-turn-helix DNA-binding domain||O-methyltransferase COMT-type
AFLA_139220	57.62734063	13550.88628	-7.8774	7.54E-10	4.82E-08	-	O-methyltransferase, family 2||S-adenosyl-L-methionine-dependent methyltransferase||Winged helix-turn-helix DNA-binding domain||O-methyltransferase COMT-type
AFLA_139230	1.345757218	577.5675381	-8.7454	5.41E-08	2.42E-06	-	NAD(P)-binding domain
AFLA_139240	5.663662416	1477.584776	-8.0273	1.40E-07	5.67E-06	-	Protein of unknown function DUF1772
AFLA_139250	31.35388388	6439.201404	-7.6821	9.88E-10	6.19E-08	-	Cytochrome P450||Cytochrome P450, conserved site||Cytochrome P450, E-class, group I
AFLA_139260	24.21272909	3789.825701	-7.2902	1.07E-08	5.52E-07	-	Cytochrome P450, conserved site||Cytochrome P450, E-class, group I||Cytochrome P450
AFLA_139270	890.8288295	12761.54382	-3.8405	3.22E-11	2.54E-09	-	Protein of unknown function DUF4267
AFLA_139280	31.72967593	4747.658527	-7.2252	8.91E-10	5.67E-08	-	Cytochrome P450||Cytochrome P450, E-class, group I
AFLA_139290	8.7309689	2185.73818	-7.9678	1.04E-17	1.94E-15	-	Dimeric alpha-beta barrel||EthD domain
AFLA_139300	95.8150096	23985.9741	-7.9677	6.73E-10	4.34E-08	-	Short-chain dehydrogenase/reductase SDR||Short-chain dehydrogenase/reductase, conserved site||NAD(P)-binding domain
AFLA_139310	49.7967987	12727.0834	-7.9976	6.12E-11	4.69E-09	-	NADP-dependent oxidoreductase domain||Aldo/keto reductase/potassium channel subunit beta
AFLA_139320	66.56940487	13402.62523	-7.6534	5.51E-12	5.03E-10	-	Alpha/beta hydrolase fold-3||Alpha/Beta hydrolase fold
AFLA_139330	41.27811501	9303.039801	-7.8162	1.38E-08	6.91E-07	-	NAD(P)-binding domain||Short-chain dehydrogenase/reductase, conserved site||Short-chain dehydrogenase/reductase SDR
AFLA_139340	2081.699436	9913.435839	-2.2516	3.93E-16	5.84E-14	-	Winged helix-turn-helix DNA-binding domain||S-adenosyl-L-methionine-dependent methyltransferase
AFLA_139360	918.7096422	1765.495157	-0.94239	0.00014045	0.0025769	-	Aflatoxin regulatory protein||Zn(2)-C6 fungal-type DNA-binding domain
AFLA_139370	170.3403096	4615.012105	-4.7598	0.0001022	0.0019415	-	Acyl transferase||Acyl transferase/acyl hydrolase/lysophospholipase||MaoC-like domain||Acyl transferase domain||Fatty acid synthase||Polyketide synthase, acyl transferase domain||Fatty acid synthase, beta subunit, fungi||Domain of unknown function DUF1729||HotDog domain||Aldolase-type TIM barrel
AFLA_139380	350.1849184	3520.558375	-3.3296	0.00020019	0.003468	-	Phosphopantetheine-protein transferase domain||Beta-ketoacyl synthase, C-terminal||Polyketide synthase, beta-ketoacyl synthase domain||Polyketide synthase, ketoreductase domain||4'-phosphopantetheinyl transferase superfamily||NAD(P)-binding domain||Beta-ketoacyl synthase, N-terminal||Thiolase-like||Beta-ketoacyl synthase, active site
AFLA_139390	95.50740934	11215.9704	-6.8757	2.31E-05	0.00054282	-	NAD(P)-binding domain||Short-chain dehydrogenase/reductase SDR
AFLA_139400	28.21090633	4414.546099	-7.2899	2.54E-07	9.71E-06	-	Protein of unknown function DUF1772
AFLA_139410	164.8060482	14449.93135	-6.4541	0.00015765	0.0028348	-	Polyketide product template domain||Beta-ketoacyl synthase, C-terminal||Malonyl-CoA ACP transacylase, ACP-binding||Polyketide synthase, acyl transferase domain||Thiolase-like||Thioesterase||Polyketide synthase, phosphopantetheine-binding domain||Phosphopantetheine binding ACP domain||Acyl transferase||Starter unit:ACP transacylase||Polyketide synthase, dehydratase domain||Acyl transferase/acyl hy…
AFLA_139420	2001.501921	3403.759793	-0.76605	0.0018428	0.021496	-	Major facilitator superfamily domain||Major facilitator superfamily
AFLA_139560	62.67223294	30.86998088	1.0216	0.005418	0.049513	-	Zn(2)-C6 fungal-type DNA-binding domain||Transcription factor domain, fungi
AFLA_139630	54.93578919	15.96704845	1.7826	0.0043505	0.042073	-	ABC transporter, conserved site||AAA+ ATPase domain||ABC transporter type 1, transmembrane domain||ABC transporter-like||P-loop containing nucleoside triphosphate hydrolase
