# Supplementary material for: Exploration of the Regulatory Mechanism of Secondary Metabolism by Comparative Transcriptomics in Aspergillus flavus
Source: Front Microbiol. 2018 Aug 7;9:1568. doi: 10.3389/fmicb.2018.01568 (PMC6090018; doi:10.3389/fmicb.2018.01568)
Supplement: TABLE S3 — Differential expression genes in ΔAfStuA vs. WT. [file Table_3.XLS]

Gene_id	��AfStuA_YES	WT_YES	log2FoldChange	pval	padj	Gene name	InterPro description
AFLA_000610	0.62892932	15.41822122	-4.6156	5.08E-05	0.0017099	-//-
AFLA_000870	112.7285763	24.62170535	2.1949	7.85E-07	3.95E-05	-//-
AFLA_001000	13.91477236	87.80402249	-2.6577	0.0028752	0.045044	-	Kelch-type beta propeller
AFLA_001440	109.8960419	44.81251854	1.2942	0.0014882	0.027194	-	Feruloyl esterase B/C||Tannase/feruloyl esterase||Alpha/Beta hydrolase fold
AFLA_001500	0.745730775	10.21695838	-3.7762	0.0018348	0.031824	-	Marvel domain
AFLA_001510	50.53272122	513.882422	-3.3461	2.08E-06	9.75E-05	-	Amidase||Amidase signature domain
AFLA_001520	130.6177207	316.6971654	-1.2778	0.00041888	0.0096167	-//-
AFLA_001530	95.28476983	395.3558463	-2.0528	6.26E-08	3.99E-06	-	Major facilitator superfamily domain||Major facilitator superfamily
AFLA_001950	32.36584296	129.397478	-1.9993	3.71E-06	0.00016098	-	Short-chain dehydrogenase/reductase SDR||NAD(P)-binding domain||Short-chain dehydrogenase/reductase, conserved site
AFLA_002060	280.7577755	1065.676712	-1.9244	2.96E-06	0.00013207	-	Alcohol dehydrogenase, N-terminal||Polyketide synthase, enoylreductase domain||GroES-like||Alcohol dehydrogenase, zinc-type, conserved site||NAD(P)-binding domain||Alcohol dehydrogenase superfamily, zinc-type||Alcohol dehydrogenase, C-terminal
AFLA_002200	309.8047797	118.1838289	1.3903	0.00017123	0.0046864	-	SGNH hydrolase-type esterase domain
AFLA_002440	598.9841956	227.3645064	1.3975	0.0001108	0.0032312	-//-
AFLA_002660	2.116680355	182.4963154	-6.4299	0.0025025	0.040254	-	Isoprenoid synthase domain
AFLA_002830	1032.419609	267.2711477	1.9497	0.0032373	0.049729	-	Glycosyl transferase, family 20
AFLA_002920	17.91179276	1.844061184	3.28	0.00012332	0.0035391	-	Cytochrome P450, conserved site||Cytochrome P450, E-class, group I||Cytochrome P450
AFLA_003960	4.570676647	4727.568069	-10.014	0.00023484	0.0060518	-	EF-hand domain||EF-hand domain pair
AFLA_004240	11.2066637	145.486695	-3.6985	1.48E-11	1.67E-09	-//-
AFLA_004350	1.938157912	2659.907195	-10.422	8.66E-28	4.76E-25	-	Phosphatidylserine decarboxylase-related||Phophatidylserine decarboxylase||Phosphatidylserine decarboxylase
AFLA_004370	104.4983878	259.6674393	-1.3132	0.00050736	0.0112	-	Cytochrome P450||Cytochrome P450, E-class, group I
AFLA_004690	1759.755966	542.4701622	1.6978	0.0020391	0.03456	-//-
AFLA_004830	553.5647317	251.2554314	1.1396	0.0010641	0.02106	-	Lipopolysaccharide-modifying protein
AFLA_004980	408.3236875	1035.264573	-1.3422	9.06E-05	0.0027627	-//-
AFLA_005030	80.50921888	30.85560845	1.3836	0.0015359	0.027904	-	Transcription factor domain, fungi||Zn(2)-C6 fungal-type DNA-binding domain
AFLA_005120	235.7729476	529.8284117	-1.1681	0.0014296	0.02643	-	FAD/NAD(P)-binding domain||FAD dependent oxidoreductase
AFLA_005130	9.509529725	145.3884075	-3.9344	1.26E-05	0.00049879	-	Heterokaryon incompatibility||Aldolase-type TIM barrel||Lysine-2,3-aminomutase/glutamate 2,3-aminomutase
AFLA_005360	5.743374837	139.1333224	-4.5984	0.0023721	0.038749	-	Berberine/berberine-like||CO dehydrogenase flavoprotein-like, FAD-binding, subdomain 2||FAD-binding, type 2||FAD-binding, type 2, subdomain 1||FAD linked oxidase, N-terminal
AFLA_005480	453.2489232	212.4035372	1.0935	0.0019255	0.033034	-	NAD(P) transhydrogenase, alpha subunit, C-terminal||NADP transhydrogenase, beta subunit||NAD(P)-binding domain||NAD(P) transhydrogenase, alpha subunit||Alanine dehydrogenase/pyridine nucleotide transhydrogenase, conserved site-2||Alanine dehydrogenase/pyridine nucleotide transhydrogenase, NAD(H)-binding domain
AFLA_005520	988.9728003	408.2553204	1.2765	0.00029873	0.0072959	-	Fungal transcription factor||Zn(2)-C6 fungal-type DNA-binding domain
AFLA_005540	1233.757487	569.2837141	1.1158	0.0023517	0.038585	-	Sugar/inositol transporter||Major facilitator, sugar transporter-like||Sugar transporter, conserved site||Major facilitator superfamily domain
AFLA_005550	1572.890608	369.8244873	2.0885	0.00047275	0.010603	-	Kynurenine formamidase
AFLA_005560	1270.67862	459.8522559	1.4664	0.0027874	0.043941	-//-
AFLA_005740	1565.841782	716.9183499	1.1271	0.0016437	0.029264	-	Zn(2)-C6 fungal-type DNA-binding domain||Transcription factor domain, fungi
AFLA_005790	413.4193665	949.1952941	-1.1991	0.00058126	0.012589	-//-
AFLA_006340	14.18313889	126.1477774	-3.1529	1.29E-09	1.08E-07	-	Glycoside hydrolase superfamily||Glycoside hydrolase, catalytic domain||Glycoside hydrolase family 18, catalytic domain||Glycoside hydrolase, chitinase active site
AFLA_006350	1931.040675	14947.93562	-2.9525	1.35E-14	2.25E-12	-	FAD/NAD(P)-binding domain||Pyridine nucleotide-disulphide oxidoreductase, class-II
AFLA_006730	441.1525767	97.52498463	2.1774	1.73E-08	1.20E-06	-	Alcohol dehydrogenase superfamily, zinc-type||Alcohol dehydrogenase, zinc-type, conserved site||GroES-like||Alcohol dehydrogenase, N-terminal
AFLA_007810	2.419425283	36.5190898	-3.9159	8.22E-05	0.0025833	-	Isopenicillin N synthase-like||Oxoglutarate/iron-dependent dioxygenase||Non-haem dioxygenase N-terminal domain
AFLA_007860	151.7930897	849.0806831	-2.4838	8.72E-11	8.74E-09	-	Major facilitator superfamily domain||Proton-dependent oligopeptide transporter family
AFLA_008120	176.1914646	388.7790121	-1.1418	0.0018763	0.032397	-	Fungal transcription factor||Zn(2)-C6 fungal-type DNA-binding domain
AFLA_008190	402.0935167	166.3065042	1.2737	0.0010825	0.021391	-//-
AFLA_008450	1547.961297	3756.080291	-1.2789	0.00018699	0.0050131	-//-
AFLA_008520	2049.985092	925.141024	1.1479	0.0007371	0.015512	-	Glycoside hydrolase, family 13||Glycoside hydrolase, catalytic domain||Glycosyl hydrolase, family 13, catalytic domain||Glycosyl hydrolase, all-beta||Glycoside hydrolase superfamily
AFLA_008880	2.395205309	28.42894422	-3.5691	2.16E-06	9.96E-05	-	Alcohol dehydrogenase, N-terminal||Polyketide synthase, enoylreductase domain||GroES-like||Alcohol dehydrogenase, zinc-type, conserved site||NAD(P)-binding domain||Alcohol dehydrogenase superfamily, zinc-type||Alcohol dehydrogenase, C-terminal
AFLA_008910	2625.06037	633.2823758	2.0514	1.13E-08	8.27E-07	-//-
AFLA_009070	11.62992059	42.24996399	-1.8611	0.0012479	0.023848	-	Protein of unknown function DUF2841
AFLA_009220	21.6609561	152.3221274	-2.814	2.28E-10	2.15E-08	-//-
AFLA_009250	10.21326846	217.2001268	-4.4105	0.00018375	0.0049472	-//-
AFLA_009260	0	52.23444426	#NAME?	5.99E-10	5.40E-08	-//-
AFLA_009270	26.54023768	323.2422956	-3.6064	6.57E-13	8.22E-11	-//-
AFLA_009900	85.09942122	326.6558329	-1.9406	1.16E-06	5.70E-05	-	Mg2+ transporter protein, CorA-like/Zinc transport protein ZntB
AFLA_010180	612.2221641	247.0445273	1.3093	0.00054874	0.011988	-	Thioredoxin-like fold
AFLA_010360	16.08672579	2.512137157	2.6789	0.0012849	0.02442	-	Alcohol dehydrogenase, C-terminal||Alcohol dehydrogenase superfamily, zinc-type||NAD(P)-binding domain||Alcohol dehydrogenase, zinc-type, conserved site||GroES-like||Polyketide synthase, enoylreductase domain||Alcohol dehydrogenase, N-terminal
AFLA_010590	9.98708658	69.42583698	-2.7973	1.26E-07	7.48E-06	-	Protein of unknown function DUF1749||Alpha/Beta hydrolase fold
AFLA_010790	51.47220172	6148.803295	-6.9004	2.32E-16	5.05E-14	-	Thioredoxin-like fold||Glutathione S-transferase, C-terminal||Glutathione S-transferase, N-terminal||Glutathione S-transferase, C-terminal-like
AFLA_010800	5.268747985	1866.056427	-8.4683	2.65E-19	7.45E-17	-//-
AFLA_010940	1048.658486	310.7488573	1.7547	3.28E-06	0.00014545	-	Cyanamide hydratase||HD domain||HD/PDEase domain
AFLA_010990	4.694118621	25.12352394	-2.4201	0.0019513	0.033342	-	Glucose-methanol-choline oxidoreductase, C-terminal||Glucose-methanol-choline oxidoreductase||Glucose-methanol-choline oxidoreductase, N-terminal||FAD/NAD(P)-binding domain
AFLA_011240	222.8013444	932.0829973	-2.0647	1.19E-07	7.15E-06	-	Protein of unknown function DUF4237
AFLA_011300	12.67761579	265.4259698	-4.388	4.19E-13	5.29E-11	-	Molybdenum cofactor sulfurase, C-terminal-like||Pyruvate kinase-like, insert domain||Molybdenum cofactor sulfurase, C-terminal
AFLA_011310	1.735415495	27.25895372	-3.9734	2.12E-06	9.83E-05	-	Nucleoside phosphorylase||Nucleoside phosphorylase domain||Ankyrin repeat-containing domain||P-loop containing nucleoside triphosphate hydrolase||Ankyrin repeat
AFLA_011380	553.7606304	54.88388368	3.3348	1.05E-13	1.49E-11	-	Alpha/Beta hydrolase fold||Alpha/beta hydrolase fold-1
AFLA_011390	110.4023097	14.68393427	2.9105	2.84E-10	2.66E-08	-//-
AFLA_011400	189.1014963	26.18775135	2.8522	5.82E-11	6.03E-09	-//-
AFLA_011470	515.1373273	210.1795881	1.2933	0.0013792	0.025874	-//-
AFLA_011770	1636.255787	4827.366543	-1.5608	1.45E-05	0.00056998	-//-
AFLA_011780	110.7122831	319.2588551	-1.5279	8.44E-05	0.0026378	-//-
AFLA_012030	380.1497479	106.1591232	1.8403	5.53E-07	2.87E-05	-	Ion channel regulatory protein, UNC-93||Major facilitator superfamily domain
AFLA_012050	898.0539759	124.7095803	2.8482	7.08E-12	8.12E-10	-	Metal-dependent hydrolase, composite domain||Metal-dependent hydrolase||N-acetylglucosamine-6-phosphate deacetylase||Amidohydrolase-related
AFLA_012070	729.079051	321.4719772	1.1814	0.00099517	0.019883	-	Aldehyde dehydrogenase N-terminal domain||Aldehyde dehydrogenase, glutamic acid active site||Aldehyde dehydrogenase domain||Aldehyde dehydrogenase, C-terminal||Aldehyde/histidinol dehydrogenase||Aldehyde dehydrogenase, cysteine active site
AFLA_012080	1964.429418	62.98593252	4.9629	1.45E-05	0.00056998	-	Glucosamine-6-phosphate isomerase, conserved site||Glucosamine/galactosamine-6-phosphate isomerase||Glucosamine-6-phosphate isomerase
AFLA_012960	1913.554834	462.2435206	2.0495	1.33E-06	6.42E-05	-	Glycoside hydrolase superfamily||Glycoside hydrolase, catalytic domain||Glycoside hydrolase, family 5
AFLA_013150	129.4372056	52.054141	1.3142	0.0019499	0.033342	-	Fungal transcription factor
AFLA_013220	3.381960025	366.9487016	-6.7616	5.05E-06	0.00021344	-	Beta-lactamase/transpeptidase-like||Beta-lactamase-related
AFLA_013230	14.43080335	1560.666544	-6.7569	1.90E-09	1.53E-07	-	Flavin monooxygenase-like||FAD/NAD(P)-binding domain
AFLA_013530	0.329894907	8.956720328	-4.7629	0.0016455	0.029264	-//-
AFLA_013540	61.93002266	264.7756097	-2.0961	7.76E-08	4.88E-06	-	Carboxylesterase type B, active site||Carboxylesterase type B, conserved site||Carboxylesterase, type B||Alpha/Beta hydrolase fold
AFLA_013670	0.299034413	30.63170912	-6.6786	0.00052691	0.011551	-	NAD(P)-binding domain||NmrA-like domain
AFLA_013770	443.5436762	25.35843245	4.1285	6.38E-14	9.59E-12	-//-
AFLA_013780	334.5052903	12.89886926	4.6967	1.82E-21	6.23E-19	-	Ricin B, lectin domain
AFLA_013860	1323.867492	429.3309435	1.6246	0.00013027	0.0037049	-	Sialidases
AFLA_013880	136.6866708	24.78412038	2.4634	2.91E-05	0.0010509	-	Alpha/Beta hydrolase fold||Lipase, secreted
AFLA_014030	0	7.578489927	#NAME?	0.001089	0.021459	-//-
AFLA_014110	12.46452234	39.80623813	-1.6752	0.0020236	0.034391	-	Amidohydrolase-related||Metal-dependent hydrolase||Metal-dependent hydrolase, composite domain
AFLA_014150	65.95027928	11.99363648	2.4591	2.55E-05	0.00093041	-	NTF2-like domain
AFLA_014230	637.8642723	140.2934354	2.1848	0.0031654	0.048862	-	Phosphatidylserine decarboxylase||Phosphatidylserine decarboxylase-related
AFLA_014240	150.6534015	24.56997194	2.6163	7.32E-10	6.38E-08	-//-
AFLA_014390	9.948805056	35.82805343	-1.8485	0.0011599	0.022629	-	Major facilitator superfamily||Major facilitator superfamily domain
AFLA_014530	110.390387	15.37736284	2.8437	0.00065302	0.013858	-	Oxidoreductase FAD/NAD(P)-binding||Ferredoxin reductase-type FAD-binding domain||Globin/Protoglobin||Globin-like||Riboflavin synthase-like beta-barrel||Phenol hydroxylase reductase||Globin||Flavohemoprotein
AFLA_014860	75.13030996	28.46263576	1.4003	0.0018282	0.031798	-	Porphobilinogen deaminase, C-terminal||Porphobilinogen deaminase, N-terminal||Porphobilinogen deaminase, dipyrromethane cofactor binding site||Porphobilinogen deaminase
AFLA_014920	151.0467918	1219.920665	-3.0137	0.0023227	0.038337	-	Peptidase family A1 domain||Aspartic peptidase A1 family||Aspartic peptidase domain||Aspartic peptidase, active site
AFLA_014950	655.4164311	1462.204782	-1.1577	0.00051305	0.011286	-	Short-chain dehydrogenase/reductase SDR||NAD(P)-binding domain
AFLA_015060	1611.129805	511.9705543	1.6539	0.00045969	0.010384	-	Phytanoyl-CoA dioxygenase
AFLA_015110	33.32857031	246.6758711	-2.8878	7.83E-07	3.95E-05	-	Dynamin superfamily||P-loop containing nucleoside triphosphate hydrolase
AFLA_015180	1679.797016	731.9298091	1.1985	0.0031414	0.04867	-//-
AFLA_015530	75.65455313	425.5840229	-2.4919	0.00021175	0.0056053	-	Leucine-rich repeat domain, L domain-like
AFLA_015550	235.9723748	106.452836	1.1484	0.0020112	0.034225	-	Sugar/inositol transporter||Major facilitator, sugar transporter-like||Major facilitator superfamily domain||Sugar transporter, conserved site
AFLA_015630	177.3172732	576.2620222	-1.7004	8.07E-06	0.00033203	-	Patatin/Phospholipase A2-related||Acyl transferase/acyl hydrolase/lysophospholipase
AFLA_015700	1790.750149	784.8875065	1.19	0.0010893	0.021459	-	Aldolase-type TIM barrel||Ribulose-phosphate 3-epimerase||Ribulose-phosphate 3-epimerase-like||Ribulose-phosphate binding barrel
AFLA_015800	999.7877636	4477.666101	-2.1631	0.0010219	0.02032	-	Glutathione-dependent formaldehyde-activating enzyme/centromere protein V||Mss4-like
AFLA_016100	3.680994438	428.1697161	-6.8619	2.02E-15	3.65E-13	-	FAD/NAD(P)-binding domain||Glucose-methanol-choline oxidoreductase, N-terminal||Glucose Oxidase, domain 2
AFLA_016110	3.292308548	371.9461642	-6.8199	2.23E-12	2.65E-10	-	Glucose-methanol-choline oxidoreductase, C-terminal||FAD/NAD(P)-binding domain||Glucose-methanol-choline oxidoreductase, N-terminal
AFLA_016120	21.15644187	3487.417083	-7.3649	2.80E-54	3.92E-51	-	S-adenosyl-L-methionine-dependent methyltransferase||O-methyltransferase, family 2||O-methyltransferase COMT-type
AFLA_016130	19.1667214	2422.873838	-6.982	6.18E-50	7.80E-47	-	Winged helix-turn-helix DNA-binding domain
AFLA_016140	44.50886454	712.9611178	-4.0017	4.10E-09	3.16E-07	-	Scytalone dehydratase||NTF2-like domain
AFLA_016200	23.79540852	5.768120286	2.0445	0.0015918	0.028756	-	Major facilitator superfamily domain||Major facilitator superfamily
AFLA_016570	156.7706096	34.17175987	2.1978	0.0012463	0.023848	-	Alpha/beta hydrolase fold-1||Alpha/Beta hydrolase fold
AFLA_016610	176.6164539	29.40038798	2.5867	0.0015951	0.028774	-//-
AFLA_017220	841.9671369	9936.207075	-3.5609	5.45E-22	2.08E-19	-	Pyridoxal phosphate-dependent transferase||Pyridoxal phosphate-dependent transferase, major region, subdomain 1||Pyridoxal phosphate-dependent decarboxylase
AFLA_017300	1731.899975	7891.971028	-2.188	6.52E-09	4.90E-07	-	Cytochrome P450||Cytochrome P450, E-class, group I||Cytochrome P450, conserved site
AFLA_017410	3752.565421	337.8620468	3.4734	5.06E-07	2.65E-05	-	FMN-binding split barrel
AFLA_017480	1355.023083	312.5631209	2.1161	0.0017872	0.031167	-	SUN family
AFLA_017880	951.488812	332.834218	1.5154	2.49E-05	0.00091642	-//-
AFLA_018470	23.29656169	63.49530167	-1.4465	0.0026685	0.042438	-//-
AFLA_018510	126.1966416	51.88417542	1.2823	0.0012439	0.023848	-	RmlC-like cupin domain||Cupin 2, conserved barrel||RmlC-like jelly roll fold||Uncharacterised conserved protein UCP019307, cupin-type
AFLA_018800	1539.567429	444.8581033	1.7911	1.01E-06	4.99E-05	-	Nitrite/sulphite reductase 4Fe-4S domain||Nitrite/Sulfite reductase ferredoxin-like domain||Rieske [2Fe-2S] iron-sulphur domain||FAD/NAD(P)-binding domain||Nitrite/sulphite reductase iron-sulphur/sirohaem-binding site||Nitrite reductase [NAD(P)H] small subunit, NirD||BFD-like [2Fe-2S]-binding domain
AFLA_018810	269.5370821	93.92969388	1.5208	4.48E-05	0.0015428	-	NADH:cytochrome b5 reductase (CBR)||Riboflavin synthase-like beta-barrel||Cytochrome b5-like heme/steroid binding domain||Cytochrome b5, heme-binding site||Oxidoreductase, FAD-binding domain||Immunoglobulin E-set||Flavoprotein pyridine nucleotide cytochrome reductase||Oxidoreductase, molybdopterin binding site||Ferredoxin reductase-type FAD-binding domain||Oxidoreductase FAD/NAD(P)-binding||Nitra…
AFLA_018890	221.6116546	6.868287533	5.0119	0.00022563	0.0058809	-	Immunoglobulin-like fold||Fibronectin type III||SGNH hydrolase-type esterase domain
AFLA_018900	153.1497958	66.36970685	1.2063	0.0024739	0.039998	-//-
AFLA_019120	15.6642494	1.556391039	3.3312	0.00026035	0.0065486	-//-
AFLA_019140	93.74934872	18.06751674	2.3754	3.89E-05	0.0013635	-	Protein of unknown function DUF3712
AFLA_019150	41.62419032	10.87781956	1.936	0.00034515	0.0082231	-	Domain of unknown function DUF2236
AFLA_019230	2957.063345	1104.051114	1.4214	0.0012467	0.023848	-	CsbD-like
AFLA_019240	92.55790534	705.6929976	-2.9306	1.61E-07	9.42E-06	-//-
AFLA_019420	284.5899817	895.4786474	-1.6538	7.07E-06	0.00029448	-	Major facilitator superfamily domain||Major facilitator superfamily
AFLA_019430	799.9776587	2197.404842	-1.4578	0.00010821	0.003163	-	FAD-binding domain||FAD/NAD(P)-binding domain
AFLA_019510	27.89223882	87.19002416	-1.6443	0.0017349	0.030553	-	Domain of unknown function DUF1524
AFLA_019620	1052.522519	4916.657006	-2.2238	1.72E-09	1.40E-07	-//-
AFLA_019670	14.24192987	1776.859356	-6.963	4.73E-31	3.14E-28	-	Mycolic acid cyclopropane synthase||S-adenosyl-L-methionine-dependent methyltransferase
AFLA_020090	379.2784895	72.77002098	2.3818	0.001012	0.020156	-	Major facilitator superfamily domain
AFLA_020240	17.94558326	130.9743031	-2.8676	4.19E-10	3.83E-08	-	Mitochondrial matrix Mmp37
AFLA_020270	254.9154697	104.8401288	1.2818	0.00088574	0.018077	-//-
AFLA_020590	121.8744099	329.7330589	-1.4359	0.00024692	0.0063114	-	Galactose mutarotase-like domain||Glycoside hydrolase-type carbohydrate-binding||Aldose 1-/Glucose-6-phosphate 1-epimerase
AFLA_020700	2534.833958	785.5838451	1.6901	7.12E-05	0.0023047	-//-
AFLA_020780	137.0593595	327.8972407	-1.2584	0.00059002	0.012692	-	N-acyl-phosphatidylethanolamine-hydrolysing phospholipase D||Metallo-beta-lactamase
AFLA_020940	156.8616401	67.075923	1.2256	0.0015345	0.027904	-	Protein of unknown function DUF3292
AFLA_020960	42.52500408	108.0738919	-1.3456	0.0019067	0.0328	-	P-type ATPase, A domain||P-type ATPase, phosphorylation site||Heavy metal-associated domain, HMA||P-type ATPase||P-type ATPase, cytoplasmic domain N||HAD-like domain||Heavy metal-associated domain, copper ion-binding||Heavy-metal-associated, conserved site||P-type ATPase, subfamily IB
AFLA_021090	14.91851863	47.39208675	-1.6675	0.0016025	0.028825	-	Alpha/Beta hydrolase fold||Domain of unknown function DUF2235
AFLA_021100	4.941783082	26.211692	-2.4071	0.00057182	0.012406	-	Cytochrome P450, conserved site||Haem peroxidase, animal||Cytochrome P450||Haem peroxidase
AFLA_021160	1743.959847	238.3101407	2.8715	0.00010074	0.0030144	-	Aldo/keto reductase||Aldo/keto reductase, conserved site||NADP-dependent oxidoreductase domain||Aldo/keto reductase/potassium channel subunit beta
AFLA_021180	1.436381082	25.65082927	-4.1585	0.00099244	0.01986	-	Profilin conserved site||Profilin
AFLA_022340	5246.99829	2204.230219	1.2512	0.00088071	0.018053	-	Glutamate synthase, eukaryotic||Aldolase-type TIM barrel||Glutamine amidotransferase type 2 domain||Nucleophile aminohydrolases, N-terminal||Glutamate synthase domain||Glutamate synthase, central-N||Glutamate synthase, alpha subunit, C-terminal||FAD/NAD(P)-binding domain||Glutamate synthase, NADH/NADPH, small subunit 1||Dihydroprymidine dehydrogenase domain II||NAD(P)-binding domain||Alpha-helica…
AFLA_022820	4.794121133	62.88691433	-3.7134	0.00049754	0.011041	-//-
AFLA_022830	9.959936602	191.4104686	-4.2644	3.62E-14	5.81E-12	-//-
AFLA_023000	10.80195937	116.5111355	-3.4311	1.12E-11	1.28E-09	-	Ankyrin repeat||Ankyrin repeat-containing domain
AFLA_023010	35.50208477	101.5091161	-1.5156	0.001267	0.024131	-//-
AFLA_023050	16.33439025	87.69437884	-2.4246	6.65E-07	3.40E-05	-	Major facilitator superfamily||Major facilitator superfamily domain
AFLA_023070	212.2675802	1722.571228	-3.0206	4.23E-15	7.42E-13	-	RGS domain
AFLA_023080	401.9651565	2558.377822	-2.6701	3.48E-12	4.10E-10	-//-
AFLA_023160	41.39605156	188.1492485	-2.1843	5.81E-07	3.01E-05	-	Ankyrin repeat||Ankyrin repeat-containing domain
AFLA_023170	21.48165314	2.943056318	2.8677	0.00016947	0.0046519	-	Major facilitator superfamily||Major facilitator superfamily domain
AFLA_023240	17.26235398	3.459400433	2.319	0.0021597	0.03612	-//-
AFLA_023250	526.91336	2858.533191	-2.4396	1.46E-08	1.04E-06	-//-
AFLA_023330	1523.744526	225.7095386	2.7551	2.45E-13	3.22E-11	-	CYTH domain||CYTH-like domain
AFLA_023390	170.8830342	11.0715819	3.9481	0.0014042	0.02619	-	Cutinase, monofunctional||Cutinase/acetylxylan esterase||Alpha/Beta hydrolase fold
AFLA_023430	660.4911203	142.4955175	2.2126	2.30E-07	1.30E-05	-	Nucleotide-diphospho-sugar transferases||Glycosyltransferase, DXD sugar-binding motif
AFLA_023450	139.5912665	22.92089318	2.6065	0.00038368	0.0089645	-//-
AFLA_023480	4100.484443	1349.440229	1.6034	3.00E-06	0.00013354	-	Alpha-amylase, domain of unknown function DUF1966, C-terminal||Glycoside hydrolase superfamily||Glycosyl hydrolase, all-beta||Glycosyl hydrolase, family 13, catalytic domain||Glycoside hydrolase, family 13||Glycoside hydrolase, catalytic domain
AFLA_023510	432.4368224	85.67567336	2.3355	7.10E-08	4.48E-06	-	NAD(P)-binding domain||NAD-dependent epimerase/dehydratase, N-terminal domain
AFLA_023730	109.4940856	24.91781037	2.1356	2.09E-06	9.78E-05	-	D-isomer specific 2-hydroxyacid dehydrogenase, NAD-binding domain conserved site 1||NAD(P)-binding domain||D-isomer specific 2-hydroxyacid dehydrogenase, NAD-binding domain
AFLA_023890	0.62892932	9.98828441	-3.9893	0.0023218	0.038337	-//-
AFLA_024140	81.44205886	24.3075105	1.7444	0.0019328	0.033115	-	Luciferase-like domain||Nitrilotriacetate monooxygenase component A/pristinamycin IIA synthase subunit A
AFLA_024500	121.4929631	39.25151402	1.6301	8.85E-05	0.0027269	-	Protein of unknown function DUF4646
AFLA_024710	153.5183468	27.86915767	2.4617	1.76E-06	8.35E-05	-//-
AFLA_024920	746.8356975	1793.933745	-1.2643	0.00062616	0.013401	-	Calcium permeable stress-gated cation channel 1, N-terminal transmembrane domain||10TM putative phosphate transporter, extracellular tail||Calcium-dependent channel, 7TM region, putative phosphate||10TM putative phosphate transporter, cytosolic domain
AFLA_025100	65612.758	31821.46948	1.044	0.003113	0.048289	-	Glyceraldehyde 3-phosphate dehydrogenase, catalytic domain||NAD(P)-binding domain||Glyceraldehyde/Erythrose phosphate dehydrogenase family||Glyceraldehyde 3-phosphate dehydrogenase, NAD(P) binding domain||Glyceraldehyde 3-phosphate dehydrogenase, active site||Glyceraldehyde-3-phosphate dehydrogenase, type I
AFLA_025370	63.26092644	12.28983743	2.3638	2.37E-06	0.00010823	-	Pectin lyase fold/virulence factor
AFLA_025520	773.1452405	132.7991601	2.5415	0.00010599	0.0031274	-//-
AFLA_025650	44.95380727	352.7720418	-2.9722	8.52E-05	0.0026574	-//-
AFLA_025720	130.4061569	1416.363512	-3.4411	4.22E-05	0.0014727	-	Fungal transcription factor||Zn(2)-C6 fungal-type DNA-binding domain
AFLA_025840	87.13836216	19.93683459	2.1279	0.0017506	0.030749	-	Indoleamine 2,3-dioxygenase
AFLA_026140	879.7584586	14.96434165	5.8775	0.00050199	0.01112	-	Glycosyl hydrolase, family 13, catalytic domain||Alpha amylase||Glycoside hydrolase, family 13||Glycoside hydrolase, catalytic domain||Glycoside hydrolase superfamily||Alpha-amylase, domain of unknown function DUF1966, C-terminal||Glycosyl hydrolase, all-beta
AFLA_026150	435.8596093	121.6917342	1.8406	4.93E-07	2.59E-05	-	Glycosyl hydrolases family 31, conserved site||Galactose mutarotase, N-terminal barrel||Glycoside hydrolase superfamily||Glycoside hydrolase family 31||Galactose mutarotase-like domain||Glycosyl hydrolases family 31, active site
AFLA_026160	448.5845419	105.900274	2.0827	6.60E-08	4.18E-06	-	Transcription factor domain, fungi||Zn(2)-C6 fungal-type DNA-binding domain
AFLA_026230	6239.300737	2667.999258	1.2256	0.00033304	0.0080101	-	von Willebrand factor, type A
AFLA_026240	2540.760726	992.4215649	1.3562	0.00012219	0.0035147	-	P-type ATPase, C-terminal||P-type ATPase, cytoplasmic domain N||HAD-like domain||P-type ATPase, A domain||P-type ATPase, phosphorylation site||P-type ATPase, N-terminal||P-type ATPase||P-type ATPase, subfamily IV
AFLA_027120	414.1193841	1066.987201	-1.3654	0.00012849	0.0036625	-//-
AFLA_027330	1181.453551	2963.09384	-1.3265	0.00015868	0.0043939	-//-
AFLA_028770	159.1529297	64.42068072	1.3048	0.0024867	0.040101	-//-
AFLA_028830	147.9349525	1518.086099	-3.3592	4.95E-05	0.0016767	-//-
AFLA_029000	811.7431791	287.1291164	1.4993	0.00023331	0.0060342	-//-
AFLA_029120	104.0085123	673.7492345	-2.6955	0.00010796	0.003163	-//-
AFLA_029380	675.3028151	328.0659383	1.0415	0.0024285	0.039465	-	Urease, gamma/gamma-beta subunit||Urease, alpha subunit||Metal-dependent hydrolase||Metal-dependent hydrolase, composite domain||Urease active site||Urease||Urease alpha-subunit, N-terminal domain||Urease nickel binding site||Urease, beta subunit||Urease, alpha subunit, C-terminal||Amidohydrolase-related
AFLA_029720	226.2401704	836.0770939	-1.8858	5.20E-05	0.00174	-	Cytochrome P450, conserved site||Cytochrome P450, E-class, group I||Cytochrome P450
AFLA_030230	55.64579832	146.4406455	-1.396	0.0010407	0.020629	-	NAD(P)-binding domain||NAD-dependent epimerase/dehydratase, N-terminal domain
AFLA_030250	19.80873915	67.6575458	-1.7721	0.00021411	0.0056443	-	Ergosterol biosynthesis ERG4/ERG24||Sterol reductase, conserved site
AFLA_030420	148.9332021	491.2612754	-1.7218	3.26E-05	0.0011643	-	Domain of unknown function DUF2235
AFLA_030450	2761.920231	833.154785	1.729	8.12E-05	0.0025624	-	Glycosyl transferase, family 1
AFLA_030550	6.732279045	108.0534481	-4.0045	8.65E-05	0.0026836	-//-
AFLA_030610	1132.556382	520.640913	1.1212	0.0010944	0.021524	-	Haem oxygenase-like, multi-helical||Thiaminase-2/PQQC
AFLA_031050	87.09401794	4.068528197	4.42	0.0016229	0.028984	-	Killer toxin Kp4/SMK||Killer toxin, Kp4
AFLA_031090	2994.782316	562.6148703	2.4122	1.72E-06	8.18E-05	-//-
AFLA_031130	273.6878065	727.9581618	-1.4113	0.00019946	0.0053248	-	Nucleotide-diphospho-sugar transferases||Alpha-mannosyltransferase
AFLA_031900	1473.038404	551.7048843	1.4168	9.94E-05	0.0029958	-	Xylulose 5-phosphate/Fructose 6-phosphate phosphoketolase, conserved site||Xylulose 5-phosphate/Fructose 6-phosphate phosphoketolase||Xylulose 5-phosphate/Fructose 6-phosphate phosphoketolase, thiamine diphosphate binding site||Thiamin diphosphate-binding fold||Transketolase C-terminal/Pyruvate-ferredoxin oxidoreductase domain II||Xylulose 5-phosphate/Fructose 6-phosphate phosphoketolase, N-termi…
AFLA_032230	1717.62435	631.9882259	1.4424	0.0024422	0.039637	-	Putative stress-responsive protein
AFLA_032400	3.23722808	19.19059643	-2.5676	0.00165	0.029304	-//-
AFLA_032460	81.40183109	382.9658171	-2.2341	7.37E-09	5.51E-07	-	Transcriptional coactivator/pterin dehydratase||Phosphoribosyltransferase-like
AFLA_032470	964.1317823	2375.073618	-1.3007	0.0004286	0.0097865	-	HAD-like domain
AFLA_032870	5159.769139	2582.647104	0.99846	0.0025864	0.041235	-	Cyclic nucleotide-binding, conserved site||RmlC-like jelly roll fold||cAMP-dependent protein kinase regulatory subunit||Cyclic nucleotide-binding-like||Cyclic nucleotide-binding domain
AFLA_032950	36.3450913	7.248693362	2.326	8.65E-05	0.0026836	-//-
AFLA_034710	171.14244	1254.271084	-2.8736	8.22E-09	6.07E-07	-	Lactonase, 7-bladed beta propeller||WD40/YVTN repeat-like-containing domain
AFLA_034980	2.979212585	103.0283375	-5.112	4.07E-07	2.19E-05	-//-
AFLA_035070	201.0236288	547.1529556	-1.4446	6.89E-05	0.0022486	-	Alternative oxidase
AFLA_035420	30.45483503	7.909554537	1.945	0.0016936	0.030034	-//-
AFLA_035430	76.62997305	24.9093755	1.6212	0.00026932	0.0067009	-	Short-chain dehydrogenase/reductase SDR||NAD(P)-binding domain||Short-chain dehydrogenase/reductase, conserved site
AFLA_035630	215.9278832	55.43650339	1.9616	6.47E-07	3.32E-05	-//-
AFLA_035670	0.299034413	488.7063777	-10.674	3.78E-07	2.06E-05	-//-
AFLA_035680	493.4716668	25897.64875	-5.7137	1.76E-24	8.54E-22	-	Alpha/beta hydrolase fold-1||Epoxide hydrolase-like||Alpha/Beta hydrolase fold
AFLA_035690	141.2093033	1948.906531	-3.7868	9.13E-22	3.39E-19	-//-
AFLA_035700	138.6871376	1372.235201	-3.3066	6.52E-14	9.62E-12	-	NAD(P)-binding domain||NmrA-like domain
AFLA_035710	2322.841569	27344.14058	-3.5573	2.81E-20	8.64E-18	-	NAD(P)-binding domain||NmrA-like domain
AFLA_035720	45.19951485	3619.248245	-6.3232	1.12E-14	1.88E-12	-	Aldolase-type TIM barrel||NADH:flavin oxidoreductase/NADH oxidase, N-terminal
AFLA_035950	40.26906656	162.4828273	-2.0125	9.04E-05	0.0027627	-	S-adenosyl-L-methionine-dependent methyltransferase
AFLA_036360	168.6292675	8.618488886	4.2903	6.69E-19	1.80E-16	-	Mitochondrial carrier domain||Mitochondrial substrate/solute carrier||Mitochondrial carrier protein
AFLA_036450	2081.551752	310.7803042	2.7437	0.00022302	0.0058424	-	Globin/Protoglobin
AFLA_036780	115.4108821	286.1248669	-1.3099	0.0015914	0.028756	-	Amidase, conserved site||Amidase signature domain||Amidase
AFLA_036800	162.0680792	63.50710899	1.3516	0.00048041	0.010702	-	ABC-2 type transporter||ABC-transporter extracellular N-terminal domain||ABC transporter-like||CDR ABC transporter||P-loop containing nucleoside triphosphate hydrolase||AAA+ ATPase domain||ABC transporter, conserved site
AFLA_036840	35910.91397	17169.20185	1.0646	0.0024533	0.039715	-	6-phosphogluconate dehydrogenase, decarboxylating||NAD(P)-binding domain||6-phosphogluconate dehydrogenase, NADP-binding||6-phosphogluconate dehydrogenase, domain 2||6-phosphogluconate dehydrogenase, domain 3||6-phosphogluconate dehydrogenase||6-phosphogluconate dehydrogenase C-terminal domain-like||6-phosphogluconate dehydrogenase, C-terminal||6-phosphogluconate-binding site
AFLA_037600	235.8952126	74.53309609	1.6622	9.07E-06	0.00037068	-	Glycoside hydrolase, family 35||Galactose-binding domain-like||Beta-galactosidase jelly roll domain||Glycoside hydrolase superfamily||Glycoside hydrolase 35, catalytic domain||Beta-galactosidase, domain 3||Glycoside hydrolase, catalytic domain||Beta-galactosidase, domain 2
AFLA_037660	198.7008595	685.7403508	-1.7871	4.57E-06	0.00019502	-//-
AFLA_037730	5.98654827	31.61627621	-2.4009	0.00022105	0.005803	-	Peptide-N4-(N-acetyl-beta-glucosaminyl)asparagine amidase A
AFLA_038230	134.4697953	452.7114996	-1.7513	0.002517	0.040384	-	Protein of unknown function DUF4267
AFLA_038260	1.649474534	23.72368736	-3.8462	1.12E-05	0.00044919	-//-
AFLA_038280	161.0674555	866.4291212	-2.4274	1.89E-10	1.82E-08	-	Dynamin-type guanine nucleotide-binding (G) domain||P-loop containing nucleoside triphosphate hydrolase||GTPase effector domain||Dynamin superfamily||Dynamin, GTPase domain||Dynamin central domain
AFLA_038290	10.49843393	157.4784399	-3.9069	2.37E-11	2.58E-09	-	Fungal STAND N-terminal Goodbye domain||P-loop containing nucleoside triphosphate hydrolase||Tetratricopeptide-like helical domain||Tetratricopeptide repeat-containing domain||Tetratricopeptide repeat
AFLA_038400	249.6563135	33.4027052	2.9019	0.00079269	0.016517	-	Aquaporin-like||Major intrinsic protein
AFLA_038430	0.958824227	18.54772916	-4.2738	0.00082307	0.017037	-	Pyridoxal phosphate-dependent decarboxylase||Pyridoxal phosphate-dependent transferase||Pyridoxal phosphate-dependent transferase, major region, subdomain 1
AFLA_038540	0.299034413	141.4560379	-8.8858	0.0013738	0.025814	-	ABC transporter-like||P-loop containing nucleoside triphosphate hydrolase||ABC transporter, conserved site||AAA+ ATPase domain
AFLA_038550	0	257.074747	#NAME?	0.00037819	0.0088763	-	ABC transporter type 1, transmembrane domain||ABC transporter-like||P-loop containing nucleoside triphosphate hydrolase
AFLA_038580	175.5623214	4187.551537	-4.5761	6.19E-06	0.00025949	-	RTA-like protein
AFLA_038590	3.948387846	228.6483966	-5.8557	0.0025065	0.040267	-	Ankyrin repeat-containing domain||Ankyrin repeat
AFLA_038700	1191.006015	50.01850806	4.5736	0.0022619	0.03758	-	Peptidase M28
AFLA_038790	2815.368537	8921.085953	-1.6639	4.97E-06	0.00021038	-	Adenosine/AMP deaminase domain||Metal-dependent hydrolase
AFLA_039010	2.87647268	39.25019801	-3.7703	0.0020852	0.03506	-	Fungal transcription factor||Zn(2)-C6 fungal-type DNA-binding domain
AFLA_039110	0.329894907	13.20218908	-5.3226	6.58E-05	0.0021615	-	Cytochrome P450
AFLA_039180	9.241355805	44.86785448	-2.2795	0.00041016	0.009451	-	Major facilitator superfamily||Major facilitator superfamily domain
AFLA_039190	20.70974551	166.7172576	-3.009	2.34E-06	0.00010713	-//-
AFLA_039200	27.09884861	1424.071246	-5.7156	3.59E-05	0.0012749	-	Cytochrome P450, E-class, group I||Cytochrome P450, conserved site||Cytochrome P450
AFLA_039210	2.831550636	890.0655399	-8.2962	2.04E-06	9.60E-05	-	Cytochrome P450||Cytochrome P450, conserved site||Cytochrome P450, E-class, group IV
AFLA_039220	21.29004227	2130.168955	-6.6446	6.62E-05	0.0021656	-	Cytochrome P450
AFLA_039230	5.835175806	1194.428063	-7.6773	8.99E-06	0.00036838	-	Short-chain dehydrogenase/reductase SDR||NAD(P)-binding domain
AFLA_039240	0	129.4649855	#NAME?	0.00020811	0.0055207	-	Isoprenoid synthase domain
AFLA_039360	1023.446054	244.1679907	2.0675	0.00044419	0.01007	-	ABC transporter, conserved site||ABC transporter type 1, transmembrane domain||AAA+ ATPase domain||P-loop containing nucleoside triphosphate hydrolase||ABC transporter-like
AFLA_039410	6491.425454	953.1242778	2.7678	0.0031883	0.049096	-	Cell wall mannoprotein 1
AFLA_039450	2.216682866	100.2034174	-5.4984	2.16E-06	9.96E-05	-	Beta-lactamase-related||Beta-lactamase/transpeptidase-like
AFLA_039480	11.39260717	0.609079798	4.2253	0.00035688	0.0084545	-//-
AFLA_039520	9.993727099	118.7234115	-3.5704	1.18E-12	1.42E-10	-	Alpha/Beta hydrolase fold
AFLA_039530	8.433123531	136.1144174	-4.0126	1.04E-15	1.97E-13	-	Glutamine synthetase/guanido kinase, catalytic domain||Glutamine synthetase, catalytic domain
AFLA_039650	40.51946842	704.5122093	-4.1199	8.78E-24	3.82E-21	-	Ferredoxin reductase-type FAD-binding domain||Riboflavin synthase-like beta-barrel||NADH:cytochrome b5 reductase (CBR)||Oxidoreductase, FAD-binding domain||Oxidoreductase FAD/NAD(P)-binding||Flavoprotein pyridine nucleotide cytochrome reductase
AFLA_039710	258.032795	555.3547893	-1.1059	0.0016154	0.028891	-	NAD(P)-binding domain||Alcohol dehydrogenase superfamily, zinc-type||Polyketide synthase, enoylreductase domain||Alcohol dehydrogenase, N-terminal||GroES-like
AFLA_039800	98.10049465	28.62275453	1.7771	5.02E-05	0.0016947	-//-
AFLA_039820	51.52630906	326.3469591	-2.663	0.0013832	0.025874	-	RTA-like protein
AFLA_039940	59.3974958	149.8195492	-1.3348	0.0023689	0.038746	-	Zinc finger, MYND-type
AFLA_040080	438.8757457	198.4830946	1.1448	0.0015082	0.027481	-	Hydantoinase B/oxoprolinase||Hydantoinase/oxoprolinase||Hydantoinaseoxoprolinase, N-terminal
AFLA_040150	5990.076978	2161.728199	1.4704	1.84E-05	0.00070117	-	Amino acid/polyamine transporter I
AFLA_040230	212.2136862	62.8031891	1.7566	6.69E-06	0.00027968	-	Low affinity iron permease, Fet4
AFLA_040250	46.45268985	14.62498606	1.6673	0.0011915	0.023005	-//-
AFLA_040270	737.2636019	9.287736973	6.3107	1.61E-05	0.00061936	-//-
AFLA_040280	389.7897134	34.1379724	3.5132	0.00077392	0.016153	-	YjgF/YER057c/UK114 family||Endoribonuclease L-PSP/chorismate mutase-like
AFLA_040360	209.2122105	78.35725268	1.4168	0.00023568	0.006061	-//-
AFLA_040410	23.76376751	4.559615645	2.3818	0.00073463	0.015486	-//-
AFLA_040690	29.03348862	93.46839791	-1.6868	0.00040425	0.0093659	-	SKP1/BTB/POZ domain
AFLA_040800	25.99724932	638.4277213	-4.6181	1.56E-21	5.61E-19	-//-
AFLA_040850	12.39342344	145.8087394	-3.5564	3.20E-05	0.0011494	-	OTT_1508-like deaminase
AFLA_041100	384.0778715	173.6625929	1.1451	0.0027072	0.042837	-	Domain of unknown function DUF3533
AFLA_041160	12.76062674	60.14658285	-2.2368	1.90E-05	0.00071697	-	Isopenicillin N synthase-like||Oxoglutarate/iron-dependent dioxygenase
AFLA_041210	15.28298454	76.22425331	-2.3183	3.70E-06	0.00016098	-//-
AFLA_041280	35.60404416	382.8147987	-3.4265	3.13E-10	2.91E-08	-	FAD/NAD(P)-binding domain||Flavin monooxygenase-like
AFLA_041630	132.6005868	51.79041152	1.3563	0.00051748	0.011364	-	Ankyrin repeat||Ankyrin repeat-containing domain
AFLA_041890	599.0496786	161.1529001	1.8942	4.61E-07	2.46E-05	-//-
AFLA_042150	492.8501798	238.4683582	1.0474	0.0020515	0.034724	-	Intradiol ring-cleavage dioxygenase, C-terminal||Catechol dioxygenase, N-terminal||Intradiol ring-cleavage dioxygenase, core
AFLA_042210	1.972728921	115.5961803	-5.8728	0.0022596	0.03758	-	Double-stranded RNA-binding domain
AFLA_042360	8.625514914	8657.83176	-9.9712	2.39E-16	5.11E-14	-	Isoprenoid synthase domain
AFLA_042370	17.12485046	15974.41047	-9.8655	1.02E-17	2.43E-15	-	Isoprenoid synthase domain
AFLA_042390	3378.099747	28220.44182	-3.0625	1.59E-11	1.77E-09	-	Glyceraldehyde 3-phosphate dehydrogenase, NAD(P) binding domain||Glyceraldehyde/Erythrose phosphate dehydrogenase family||Glyceraldehyde-3-phosphate dehydrogenase, type I||Glyceraldehyde 3-phosphate dehydrogenase, active site||Glyceraldehyde 3-phosphate dehydrogenase, catalytic domain||NAD(P)-binding domain
AFLA_042460	16.62229312	109.4316883	-2.7188	4.63E-09	3.52E-07	-	Dienelactone hydrolase||Alpha/Beta hydrolase fold
AFLA_042480	4.419304183	48.05036387	-3.4427	1.53E-08	1.08E-06	-	NAD(P)-binding domain||Alcohol dehydrogenase superfamily, zinc-type||Alcohol dehydrogenase, C-terminal||Alcohol dehydrogenase, N-terminal||Polyketide synthase, enoylreductase domain||GroES-like
AFLA_042520	77.89544533	21.12008257	1.8829	0.00010228	0.003046	-	Endoribonuclease L-PSP/chorismate mutase-like||YjgF/YER057c/UK114 family
AFLA_042530	424.9125221	187.4530538	1.1806	0.00072246	0.015255	-	Molybdate transporter 1/2
AFLA_042540	279.0095386	83.71381168	1.7368	0.0011788	0.02283	-//-
AFLA_042750	79.00915993	433.750786	-2.4568	6.40E-10	5.69E-08	-//-
AFLA_042770	5.979907751	24.3688509	-2.0268	0.0030648	0.047601	-	Major facilitator superfamily||Major facilitator superfamily domain
AFLA_042830	16.34103077	0.896749943	4.1876	0.0002502	0.0063568	-	Mannose-6-phosphate isomerase, type I||Phosphomannose isomerase, type I, conserved site||RmlC-like jelly roll fold||RmlC-like cupin domain||Mannose-6-phosphate isomerase
AFLA_042890	415.3922562	1348.719176	-1.699	3.75E-06	0.00016205	-//-
AFLA_042900	424.5466553	7081.425892	-4.06	3.51E-19	9.64E-17	-//-
AFLA_042940	63.30779473	222.8930549	-1.8159	0.00046558	0.010479	-	UbiA prenyltransferase family
AFLA_043010	43.38186891	152.0692152	-1.8096	0.002283	0.037832	-	Acetamidase/Formamidase
AFLA_044130	104.1552118	236.9271739	-1.1857	0.0028161	0.044227	-//-
AFLA_044580	3716.88116	1066.604069	1.8011	0.000106	0.0031274	-//-
AFLA_044940	306.1595433	658.9910292	-1.106	0.0017777	0.031047	-	PB1 domain
AFLA_045320	32.93695442	152.5448448	-2.2115	7.37E-07	3.74E-05	-	Interferon alpha-inducible protein 6/27
AFLA_045450	82.46241146	34.5523096	1.255	0.0026971	0.042731	-	Ankyrin repeat-containing domain||Potassium/sodium transporter Trk/HKT||Cation transporter||Ankyrin repeat
AFLA_045550	44.1117845	14.79349175	1.5762	0.0025204	0.040387	-//-
AFLA_045610	9.168503272	58.49609216	-2.6736	4.04E-07	2.18E-05	-	Cholinesterase||Carboxylesterase, type B||Alpha/Beta hydrolase fold||Carboxylesterase type B, active site
AFLA_045620	307.5744312	1170.25348	-1.9278	1.21E-07	7.18E-06	-//-
AFLA_045690	60.70028712	141.6936077	-1.223	0.0023438	0.038585	-	Glycoside hydrolase superfamily||Glycoside hydrolase, catalytic domain||Glycoside hydrolase, family 5
AFLA_046290	4.783770098	28.32060682	-2.5656	0.00012383	0.0035455	-//-
AFLA_046690	939.5609583	289.7230295	1.6973	5.29E-05	0.0017663	-//-
AFLA_046740	528.4400023	1177.603895	-1.156	0.00099124	0.01986	-	Malic enzyme, NAD-binding||Malic enzyme, N-terminal domain||Malic oxidoreductase||Malic enzyme, conserved site||NAD(P)-binding domain
AFLA_046760	1151.760251	118.4414101	3.2816	9.50E-18	2.31E-15	-	6-phosphogluconate dehydrogenase C-terminal domain-like||Glycerol-3-phosphate dehydrogenase, NAD-dependent, C-terminal||NAD(P)-binding domain||Glycerol-3-phosphate dehydrogenase, NAD-dependent, N-terminal||Glycerol-3-phosphate dehydrogenase, NAD-dependent||6-phosphogluconate dehydrogenase, domain 2
AFLA_046860	58.15292884	160.8396855	-1.4677	0.00021966	0.0057785	-	Major facilitator superfamily domain||Major facilitator, sugar transporter-like||Sugar/inositol transporter
AFLA_046980	153.7322208	10.86099777	3.8232	7.62E-09	5.66E-07	-	Inositol monophosphatase
AFLA_046990	26.09139183	8910.572083	-8.4158	7.48E-67	1.57E-63	-	KilA, N-terminal/APSES-type HTH, DNA-binding||Transcription regulator HTH, APSES-type DNA-binding domain
AFLA_047020	174.9463092	61.34904481	1.5118	0.00022588	0.0058809	-	Cytochrome P450||Cytochrome P450, conserved site||Cytochrome P450, E-class, group I
AFLA_047040	84.78515953	28.97785573	1.5489	0.00041467	0.0095374	-	BRCT domain
AFLA_047090	14701.72793	5473.326428	1.4255	0.0029673	0.046315	-//-
AFLA_047250	167.8368504	57.39836507	1.548	8.15E-05	0.0025667	-	NAD(P)-binding domain||Short-chain dehydrogenase/reductase SDR
AFLA_048470	85.46135299	323.9846629	-1.9226	7.21E-07	3.67E-05	-//-
AFLA_048770	61.60032036	179.0105252	-1.539	0.00010594	0.0031274	-//-
AFLA_048960	455.3604921	58.45284159	2.9617	0.00037432	0.008815	-	Major facilitator superfamily domain||Major facilitator superfamily
AFLA_049190	761.7176015	179.9123473	2.082	3.25E-08	2.20E-06	-	Berberine/berberine-like||FAD-binding, type 2||FAD linked oxidase, N-terminal
AFLA_049210	52.17595109	8.416291661	2.6321	2.48E-06	0.00011203	-//-
AFLA_049250	36.62732677	11.56388943	1.6633	0.0028807	0.045074	-	Short-chain dehydrogenase/reductase SDR||Short-chain dehydrogenase/reductase, conserved site||NAD(P)-binding domain
AFLA_049340	627.1563798	115.0264323	2.4469	1.98E-10	1.89E-08	-	NADP-dependent oxidoreductase domain||Aldo/keto reductase/potassium channel subunit beta||Aldo/keto reductase
AFLA_049420	700.8133855	253.8471907	1.4651	7.54E-05	0.0024216	-	Glycoside hydrolase family 3||Glycoside hydrolase superfamily||Glycoside hydrolase, family 3, N-terminal||Glycoside hydrolase family 3 C-terminal domain||Fibronectin type III-like domain
AFLA_049460	1.106486175	12.18018403	-3.4605	0.0010342	0.020533	-	Heterokaryon incompatibility
AFLA_049530	130.6392139	17.12873631	2.9311	0.0031711	0.048891	-	Carboxylesterase type B, active site||Alpha/Beta hydrolase fold||Carboxylesterase, type B
AFLA_049660	0.745730775	95.57500672	-7.0018	3.79E-06	0.00016298	-	Protein of unknown function DUF3425
AFLA_049670	2.333484321	25.40645766	-3.4446	0.00012535	0.0035809	-	NAD(P)-binding domain||Short-chain dehydrogenase/reductase SDR
AFLA_049850	104.1440803	240.5483179	-1.2077	0.0011578	0.022629	-	UDP-N-acetylmuramate--L-alanine ligase||Mur ligase, central||Mur ligase, N-terminal catalytic domain||NAD(P)-binding domain||Mur ligase, C-terminal
AFLA_050270	9822.088623	4277.013382	1.1994	0.00038303	0.0089645	-	PH domain-like||Pleckstrin homology domain
AFLA_050590	361.0283338	70.6376661	2.3536	9.46E-08	5.74E-06	-//-
AFLA_051110	19.77065023	58.44440671	-1.5637	0.0017558	0.030749	-//-
AFLA_051250	8755.430737	2041.166727	2.1008	1.48E-09	1.22E-07	-//-
AFLA_051390	1026.171431	2577.74127	-1.3288	0.00020189	0.0053782	-	P-type ATPase, subfamily IB||Heavy metal-associated domain, copper ion-binding||Heavy-metal-associated, conserved site||P-type ATPase, cytoplasmic domain N||HAD-like domain||P-type ATPase, A domain||P-type ATPase, phosphorylation site||Heavy metal-associated domain, HMA||P-type ATPase
AFLA_051730	659.0051442	1808.603347	-1.4565	6.95E-05	0.0022623	-//-
AFLA_051830	1376.803174	3423.759282	-1.3143	0.00047637	0.010665	-//-
AFLA_051920	892.3649531	371.5686954	1.264	0.00036737	0.0086706	-	Major facilitator superfamily domain||Major facilitator superfamily
AFLA_052440	5.615441835	135.7013482	-4.5949	3.29E-18	8.31E-16	-	GTP cyclohydrolase 1 type 2/Nif3
AFLA_052460	1637.126489	4113.368686	-1.3292	0.0002483	0.0063339	-//-
AFLA_052860	21877.34703	4088.454758	2.4198	0.0001557	0.0043305	-	Heat shock protein, 9/12, fungi||Heat shock protein 9/12
AFLA_053210	74.73752833	7.021191505	3.412	4.12E-10	3.79E-08	-	Aldehyde dehydrogenase domain||Aldehyde dehydrogenase N-terminal domain||Aldehyde dehydrogenase, C-terminal||Aldehyde/histidinol dehydrogenase
AFLA_053310	1336.730367	528.3198601	1.3392	0.00014524	0.0040665	-	Major facilitator superfamily||Major facilitator superfamily domain
AFLA_053330	10386.58596	4350.443206	1.2555	0.00025786	0.0065119	-//-
AFLA_053540	57.86600973	279.3842941	-2.2715	2.91E-08	1.99E-06	-	FAD-binding domain||FAD/NAD(P)-binding domain
AFLA_053650	1007.364074	285.1510677	1.8208	2.76E-07	1.53E-05	-	Short-chain dehydrogenase/reductase, conserved site||NAD(P)-binding domain||Short-chain dehydrogenase/reductase SDR
AFLA_053660	109.2729619	444.519213	-2.0243	9.29E-06	0.00037857	-	Nuclear transport factor 2, eukaryote||Nuclear transport factor 2||NTF2-like domain
AFLA_054010	2550.091077	995.0964716	1.3576	7.69E-05	0.0024597	-	Major facilitator superfamily domain
AFLA_054120	6775.249387	2804.198038	1.2727	0.00034977	0.0083017	-	Putative threonine/serine exporter||Threonine/Serine exporter, ThrE
AFLA_054140	62.80152687	280.5947668	-2.1596	1.38E-07	8.13E-06	-//-
AFLA_054150	0.299034413	25.36775165	-6.4065	0.0018415	0.031897	-	Major facilitator superfamily domain||Major facilitator superfamily
AFLA_054320	3.347389016	21.03578176	-2.6517	0.00059573	0.012793	-	Necrosis inducing protein
AFLA_054460	14.59897476	1.886187605	2.9523	0.00081992	0.017	-//-
AFLA_054470	2419.622094	91.49324054	4.725	1.51E-13	2.05E-11	-	Chitinase II||LysM domain||Glycoside hydrolase superfamily||Chitinase insertion domain||Glycoside hydrolase, catalytic domain||Glycoside hydrolase family 18, catalytic domain||Chitin-binding, type 1
AFLA_055290	51.56283695	151.6578937	-1.5564	0.00022419	0.0058611	-//-
AFLA_055580	41.98220833	116.0518578	-1.4669	0.0020713	0.034921	-	Store-operated calcium entry-associated regulatory factor
AFLA_056100	484.7659522	1555.504057	-1.682	0.00017147	0.0046864	-	Checkpoint protein Hus1/Mec3
AFLA_056160	539.2880494	1980.416707	-1.8767	2.23E-07	1.27E-05	-//-
AFLA_056170	3963.646119	581.4677247	2.7691	0.00076505	0.01602	-	Class I glutamine amidotransferase-like||Catalase, mono-functional, haem-containing, clade 2||Catalase haem-binding site||Catalase-like domain||Catalase immune-responsive domain||Catalase core domain||Catalase active site||Catalase, mono-functional, haem-containing
AFLA_056460	181.508428	653.3988017	-1.8479	7.02E-05	0.0022789	-	CheY-like superfamily||Histidine kinase domain||Signal transduction histidine kinase, dimerisation/phosphoacceptor domain||Histidine kinase-like ATPase, C-terminal domain||Signal transduction response regulator, receiver domain
AFLA_056540	493.894207	1039.19196	-1.0732	0.0023474	0.038585	-	Major facilitator superfamily||Major facilitator superfamily domain
AFLA_056580	179.2501596	620.7094781	-1.7919	1.67E-06	8.00E-05	-//-
AFLA_056630	978.6972006	2724.814469	-1.4772	0.00049002	0.010893	-	Bestrophin/UPF0187
AFLA_056660	1.226998146	27.15900324	-4.4682	3.03E-07	1.65E-05	-//-
AFLA_056820	248.7083644	623.7608223	-1.3265	0.00058449	0.012616	-	Polyprenyl synthetase||Isoprenoid synthase domain
AFLA_057370	208.6694041	471.7755444	-1.1769	0.0020791	0.035003	-	UBA-like||Ubiquitin-conjugating enzyme/RWD-like||Ubiquitin-conjugating enzyme E2||Ubiquitin-conjugating enzyme, active site||Ubiquitin-conjugating enzyme, C-terminal fungi
AFLA_057480	288.2524448	115.5084404	1.3193	0.00063656	0.013578	-	Zn(2)-C6 fungal-type DNA-binding domain||Transcription factor domain, fungi
AFLA_057990	1026.527664	443.4615162	1.2109	0.00044557	0.010083	-	Purine nucleoside permease
AFLA_058110	82.36650468	980.833381	-3.5739	7.51E-19	1.98E-16	-	RmlC-like cupin domain||RmlC-like jelly roll fold
AFLA_058160	146.4138062	720.9166585	-2.2998	0.0014468	0.026709	-	1-aminocyclopropane-1-carboxylate deaminase/D-cysteine desulfhydrase||Tryptophan synthase beta subunit-like PLP-dependent enzyme||1-aminocyclopropane-1-carboxylate deaminase
AFLA_058650	196.7955296	830.8564717	-2.0779	3.28E-08	2.21E-06	-	Serine hydrolase FSH||Alpha/Beta hydrolase fold
AFLA_059460	84.33454997	13.16966965	2.6789	2.11E-06	9.83E-05	-//-
AFLA_059480	62.17162443	21.09487387	1.5594	0.0024491	0.039698	-	Voltage-dependent anion channel
AFLA_059580	31.59041743	298.058383	-3.238	7.62E-14	1.11E-11	-	Heterokaryon incompatibility
AFLA_059840	1.288719133	847.356535	-9.3609	0.0014752	0.026996	-//-
AFLA_059960	5.959398292	44.31664671	-2.8946	0.0023097	0.038223	-	Zn(2)-C6 fungal-type DNA-binding domain
AFLA_060020	12.87098029	266.4028327	-4.3714	1.38E-13	1.90E-11	-	Polyketide product template domain||Acyl transferase||Phosphopantetheine attachment site||Phosphopantetheine binding ACP domain||Polyketide synthase, beta-ketoacyl synthase domain||Polyketide synthase, dehydratase domain||Acyl transferase/acyl hydrolase/lysophospholipase||Acyl transferase domain||Ketoacyl-synthetase, C-terminal extension||Beta-ketoacyl synthase, C-terminal||Malonyl-CoA ACP transa…
AFLA_060030	550.5849312	17562.96119	-4.9954	3.63E-34	2.70E-31	-//-
AFLA_060180	6.550046087	64.9853858	-3.3105	2.88E-09	2.27E-07	-//-
AFLA_060200	361.7033716	70.30108643	2.3632	9.27E-10	7.96E-08	-	Amino acid transporter, transmembrane domain
AFLA_060810	49.84890404	12.22240638	2.028	0.0016071	0.028866	-//-
AFLA_060830	117.8570833	32.48065062	1.8594	1.53E-05	0.00059544	-	ABC transporter type 1, transmembrane domain
AFLA_060840	114.5481684	35.48499938	1.6907	7.29E-05	0.0023531	-	ABC transporter-like||P-loop containing nucleoside triphosphate hydrolase||AAA+ ATPase domain
AFLA_060850	199.5194641	49.43966117	2.0128	4.03E-07	2.18E-05	-	ABC transporter type 1, transmembrane domain||AAA+ ATPase domain||ABC transporter-like||P-loop containing nucleoside triphosphate hydrolase
AFLA_060870	343.356388	73.01981173	2.2333	4.91E-05	0.0016658	-//-
AFLA_060880	2563.12113	433.3091762	2.5644	1.04E-07	6.22E-06	-	Amino acid/polyamine transporter I
AFLA_060930	731.5510013	1601.19586	-1.1301	0.0017539	0.030749	-//-
AFLA_061050	3.824945872	1348.839119	-8.4621	2.17E-19	6.23E-17	-//-
AFLA_061060	0.329894907	112.6710797	-8.4159	5.81E-11	6.03E-09	-//-
AFLA_061070	4.096049795	600.7545453	-7.1964	5.59E-14	8.51E-12	-	Hydroxymethylglutaryl-CoA reductase, class I/II, substrate-binding domain||Hydroxymethylglutaryl-CoA reductase, class I/II, catalytic domain||Hydroxymethylglutaryl-CoA reductase, class I/II, NAD/NADP-binding domain||Hydroxymethylglutaryl-CoA reductase, class I/II||Hydroxymethylglutaryl-CoA reductase, class I/II, conserved site
AFLA_062290	78.98786996	315.6748343	-1.9987	4.89E-07	2.59E-05	-	Ankyrin repeat||Ankyrin repeat-containing domain
AFLA_062470	7.048112402	55.65757884	-2.9813	6.06E-05	0.0019987	-	Isoprenoid synthase domain||Terpene synthase, metal-binding domain
AFLA_062710	2288.586801	900.431653	1.3458	0.00098728	0.019851	-//-
AFLA_062860	37.25098455	1239.727809	-5.0566	0.0032412	0.049729	-	Polyketide synthase, phosphopantetheine-binding domain||Polyketide synthase, acyl transferase domain||Thiolase-like||Male sterility, NAD-binding||Malonyl-CoA ACP transacylase, ACP-binding||Beta-ketoacyl synthase, C-terminal||Phosphopantetheine attachment site||NAD(P)-binding domain||Beta-ketoacyl synthase, N-terminal||Beta-ketoacyl synthase, active site||Acyl transferase domain||Acyl transferase/…
AFLA_063060	0.598068826	58.15265439	-6.6034	0.00043652	0.0099135	-//-
AFLA_063120	743.7406773	104.8853878	2.826	1.18E-12	1.42E-10	-	CO dehydrogenase flavoprotein-like, FAD-binding, subdomain 2||FAD-binding, type 2||Berberine/berberine-like||FAD linked oxidase, N-terminal
AFLA_063220	33.83776818	586.3928841	-4.1152	3.84E-14	5.99E-12	-	Uncharacterised domain, di-copper centre||Tyrosinase copper-binding domain
AFLA_063260	1.553182537	38.83605267	-4.6441	0.00094306	0.019083	-//-
AFLA_063490	48.66468908	11.11497637	2.1304	0.00010061	0.0030144	-	Glycosyl hydrolase, five-bladed beta-propellor domain||Glycoside hydrolase, family 62, arabinosidase
AFLA_063700	13.87082344	71.42386858	-2.3644	0.0016118	0.028882	-//-
AFLA_064310	26.6093797	131.9893234	-2.3104	0.00011475	0.0033204	-//-
AFLA_064330	2.12039087	736.8996806	-8.441	2.50E-16	5.25E-14	-	Zn(2)-C6 fungal-type DNA-binding domain
AFLA_064340	0	219.3435583	#NAME?	1.40E-16	3.11E-14	-	HAD-like domain||HAD hydrolase, subfamily IA
AFLA_064410	43.26780485	282.5983134	-2.7074	7.46E-11	7.60E-09	-//-
AFLA_064430	354.5298603	1006.499024	-1.5054	4.48E-05	0.0015428	-	Major facilitator superfamily domain||Major facilitator superfamily
AFLA_064630	34.30126348	10.32768797	1.7317	0.0017316	0.030553	-	Membrane attack complex component/perforin (MACPF) domain
AFLA_064720	1.821356457	13.00837877	-2.8364	0.0028134	0.044227	-	Major facilitator superfamily domain||Major facilitator, sugar transporter-like||Sugar/inositol transporter
AFLA_064900	25050.29727	65615.33157	-1.3892	8.83E-05	0.0027257	-//-
AFLA_064950	294.7647978	1362.130495	-2.2082	3.44E-06	0.000151	-//-
AFLA_065130	6.900450453	0	Inf	0.0016381	0.029215	-	Glycosyltransferase family 28, N-terminal domain||UDP-glucuronosyl/UDP-glucosyltransferase
AFLA_065160	0.927963733	232.0358888	-7.9661	1.66E-08	1.16E-06	-//-
AFLA_065170	1.852216951	172.7055593	-6.5429	2.75E-06	0.00012348	-//-
AFLA_065220	1580.6409	159.6557548	3.3075	3.12E-18	8.04E-16	-//-
AFLA_065410	88.0126144	24.67231461	1.8348	0.00032026	0.0077469	-	Protein of unknown function DUF3632
AFLA_065550	107.0383037	3.36676068	4.9906	0.0014668	0.02696	-	Major facilitator superfamily||Major facilitator superfamily domain
AFLA_065560	51.22082674	1.20972472	5.404	0.00017643	0.0047806	-//-
AFLA_065570	378.6051096	7.662790733	5.6267	0.00028807	0.0071044	-	O-methyltransferase, family 2||S-adenosyl-L-methionine-dependent methyltransferase||Winged helix-turn-helix DNA-binding domain||O-methyltransferase COMT-type
AFLA_065960	14.89703605	18534.55909	-10.281	7.15E-86	9.03E-82	-	Fucose-specific lectin
AFLA_066010	20.26207603	1.844061184	3.4578	4.00E-05	0.0013986	-	HAD-like domain
AFLA_066020	738.0098982	142.0545695	2.3772	2.01E-08	1.39E-06	-	Aldolase-type TIM barrel||NADH:flavin oxidoreductase/NADH oxidase, N-terminal
AFLA_066420	169.9849898	74.13948075	1.1971	0.0031463	0.048686	-	Major facilitator superfamily domain||Proton-dependent oligopeptide transporter family
AFLA_066510	230.3444111	34.79878561	2.7267	0.00010191	0.0030421	-	FAD linked oxidase, N-terminal||FAD-binding, type 2||CO dehydrogenase flavoprotein-like, FAD-binding, subdomain 2||Berberine/berberine-like||FAD-binding, type 2, subdomain 1
AFLA_066750	437.7602657	88.95822916	2.2989	1.47E-09	1.22E-07	-	Glycoside hydrolase superfamily||Glycoside hydrolase family 3||Fibronectin type III-like domain||Glycoside hydrolase family 3 C-terminal domain||Glycoside hydrolase, family 3, N-terminal
AFLA_066770	87.45360761	361.7048005	-2.0482	2.14E-05	0.0007941	-	CO dehydrogenase flavoprotein-like, FAD-binding, subdomain 2||FAD-binding, type 2||FAD-binding, type 2, subdomain 1||FAD linked oxidase, N-terminal
AFLA_066780	64.86899684	24.37611366	1.4121	0.0024089	0.039198	-	Polyprenyl synthetase, conserved site||Isoprenoid synthase domain||Polyprenyl synthetase
AFLA_066810	276.092421	99.97831748	1.4655	0.0001389	0.0039062	-//-
AFLA_066970	4060.763201	10358.15529	-1.3509	0.00029707	0.0072837	-	Endonuclease/exonuclease/phosphatase
AFLA_066980	223.8131108	3402.271071	-3.9261	7.36E-23	3.00E-20	-	Polyketide synthase, phosphopantetheine-binding domain||Thiolase-like||Polyketide synthase, acyl transferase domain||Beta-ketoacyl synthase, C-terminal||Malonyl-CoA ACP transacylase, ACP-binding||NAD(P)-binding domain||Polyketide synthase, ketoreductase domain||S-adenosyl-L-methionine-dependent methyltransferase||Beta-ketoacyl synthase, N-terminal||Beta-ketoacyl synthase, active site||Methyltrans…
AFLA_067000	1799.656416	382.0409769	2.2359	0.0013285	0.02515	-	Cysteine-rich secretory protein, allergen V5/Tpx-1-related||CAP domain||Allergen V5/Tpx-1-related, conserved site
AFLA_067240	34.09481055	104.1849745	-1.6115	0.00032282	0.0077829	-//-
AFLA_068660	253.448816	536.2337785	-1.0812	0.0020673	0.034921	-//-
AFLA_069260	406.6806396	181.3277376	1.1653	0.0019095	0.032804	-//-
AFLA_069450	179.1640367	719.6742584	-2.0061	0.0032122	0.049404	-//-
AFLA_069480	2113.513456	953.0131524	1.1491	0.00079923	0.016626	-	Kelch-type beta propeller
AFLA_069490	221.6267212	95.47965851	1.2149	0.0011663	0.022657	-//-
AFLA_069600	68.85702455	8.483626782	3.0209	0.00017828	0.00481	-//-
AFLA_069740	760.6050112	1585.816089	-1.06	0.0024059	0.039198	-//-
AFLA_069890	6.914512003	182.0301301	-4.7184	6.46E-09	4.88E-07	-	P-loop containing nucleoside triphosphate hydrolase||Quinoprotein alcohol dehydrogenase-like superfamily||WD40 repeat||WD40 repeat, conserved site||WD40/YVTN repeat-like-containing domain||WD40-repeat-containing domain
AFLA_070060	1716.331688	425.4253025	2.0124	0.0017537	0.030749	-//-
AFLA_070070	41.09897403	319.2753906	-2.9576	9.17E-05	0.002791	-	Ribosomal protein L2 domain 2||Translation protein SH3-like domain
AFLA_070100	13298.98894	5194.576676	1.3562	0.00090045	0.018339	-	HEAT repeat||Importin-beta, N-terminal domain||Armadillo-type fold||HEAT, type 2||Armadillo-like helical
AFLA_070200	0.299034413	13.99776847	-5.5487	3.41E-05	0.0012129	-	Polyketide cyclase SnoaL-like domain||Heterokaryon incompatibility||NTF2-like domain
AFLA_070320	658.4814469	65.1672449	3.3369	1.56E-05	0.00060675	-	Amino acid/polyamine transporter I
AFLA_070360	107.9873861	38.82293909	1.4759	0.00052959	0.011589	-//-
AFLA_070440	103.7966059	286.6857678	-1.4657	9.61E-05	0.0029031	-//-
AFLA_070850	147.7253551	24.35198114	2.6008	0.0014274	0.026428	-	Phosphatidylserine decarboxylase||Phophatidylserine decarboxylase||Phosphatidylserine decarboxylase-related
AFLA_070970	145.4215661	52.26462921	1.4763	0.0001654	0.00456	-	Transcription factor domain, fungi
AFLA_071150	65.35064943	182.7656949	-1.4837	0.00026959	0.0067009	-	Alcohol dehydrogenase, zinc-type, conserved site||Polyketide synthase, enoylreductase domain||GroES-like||Alcohol dehydrogenase, N-terminal||Alcohol dehydrogenase, C-terminal||Alcohol dehydrogenase superfamily, zinc-type||NAD(P)-binding domain
AFLA_071590	2845.895298	986.7776827	1.5281	9.84E-06	0.0003997	-//-
AFLA_071630	635.7754575	7906.728652	-3.6365	1.90E-21	6.33E-19	-	Nucleotide-diphospho-sugar transferases
AFLA_072340	617.7194036	101.9953712	2.5984	0.00013077	0.0037107	-	GroES-like||Alcohol dehydrogenase, N-terminal||Alcohol dehydrogenase, zinc-type, conserved site||Alcohol dehydrogenase class III/S-(hydroxymethyl)glutathione dehydrogenase||NAD(P)-binding domain||Alcohol dehydrogenase, C-terminal||Alcohol dehydrogenase superfamily, zinc-type
AFLA_072380	430.2812721	111.7121725	1.9455	5.54E-05	0.0018419	-	NAD(P)-binding domain
AFLA_072640	4.488446201	110.8822585	-4.6267	0.00088617	0.018077	-	NAD(P)-binding domain||Short-chain dehydrogenase/reductase SDR
AFLA_072710	15.30545088	68.84440604	-2.1693	2.26E-06	0.00010373	-//-
AFLA_072720	130.8232112	453.9253823	-1.7948	5.61E-05	0.0018534	-//-
AFLA_072970	85.34084102	32.9970427	1.3709	0.0015975	0.028775	-	Transcription factor domain, fungi
AFLA_072980	63.56933877	16.16206719	1.9757	4.36E-05	0.0015066	-	Sugar transporter, conserved site||Major facilitator superfamily domain||Major facilitator superfamily
AFLA_073060	233.4732638	73.89623329	1.6597	2.49E-05	0.00091642	-	Glycosyltransferase family 28, N-terminal domain||UDP-glucuronosyl/UDP-glucosyltransferase
AFLA_073210	239.9076529	3232.964617	-3.7523	1.40E-08	1.00E-06	-	RmlC-like cupin domain||Cupin 1||Bicupin, oxalate decarboxylase/oxidase||RmlC-like jelly roll fold
AFLA_073380	8.378823575	52.60651114	-2.6504	4.51E-05	0.0015485	-	Alpha/beta hydrolase fold-1||Alpha/Beta hydrolase fold
AFLA_073450	143.2375186	1051.029478	-2.8753	0.00031238	0.0075855	-	Copper amine oxidase, N2-terminal||Copper amine oxidase||Copper amine oxidase, C-terminal||Copper amine oxidase, N-terminal
AFLA_073600	37.06386471	774.0416105	-4.3843	3.49E-13	4.45E-11	-	Cytochrome P450, conserved site||Cytochrome P450, E-class, group I||Cytochrome P450
AFLA_073800	1764.004936	386.6383108	2.1898	0.00038408	0.0089645	-	Short-chain dehydrogenase/reductase SDR||NAD(P)-binding domain||Short-chain dehydrogenase/reductase, conserved site
AFLA_073830	50.95344397	13.31413875	1.9362	0.00024064	0.0061634	-//-
AFLA_074030	17.69869931	62.33951069	-1.8165	0.00023368	0.0060342	-//-
AFLA_074940	2.993274135	46.3843674	-3.9538	1.38E-06	6.63E-05	-	Putative mucin or carbohydrate-binding domain||Peptidase family M60 domain
AFLA_075000	299.3202259	786.2643721	-1.3933	0.00011217	0.0032636	-	GPCR, family 2-like
AFLA_075180	220.454247	1171.206034	-2.4094	6.01E-08	3.85E-06	-	Major facilitator superfamily domain||Major facilitator superfamily
AFLA_075190	350.3900436	16049.3665	-5.5174	5.08E-39	4.93E-36	-//-
AFLA_075200	124.2231322	4035.532979	-5.0218	2.06E-19	6.05E-17	-	Protein of unknown function DUF3328
AFLA_075220	0	8.01789193	#NAME?	0.002033	0.034503	-//-
AFLA_075230	9.333937286	311.5771764	-5.061	5.67E-16	1.14E-13	-	DHS-like NAD/FAD-binding domain||Sirtuin family||Sirtuin family, catalytic core domain||Sirtuin family, catalytic core small domain
AFLA_075340	683.6389943	2095.926315	-1.6163	2.08E-05	0.00077796	-	Major facilitator superfamily||Major facilitator superfamily domain
AFLA_075440	1.343799601	24.98514549	-4.2167	1.04E-06	5.12E-05	-//-
AFLA_075450	173.8743727	1213.702758	-2.8033	2.58E-13	3.36E-11	-	S-adenosyl-L-methionine-dependent methyltransferase
AFLA_075590	444.5134399	212.9533233	1.0617	0.0021426	0.035928	-	Polyketide cyclase SnoaL-like domain||NTF2-like domain
AFLA_075780	4.402505239	22.10113332	-2.3277	0.0021628	0.036124	-//-
AFLA_075880	208.9729402	458.3981033	-1.1333	0.0021909	0.036498	-	Zn(2)-C6 fungal-type DNA-binding domain
AFLA_076020	50.29384677	130.8465599	-1.3794	0.00088576	0.018077	-	Tropomyosin
AFLA_076170	0.958824227	169.1891426	-7.4632	4.11E-28	2.36E-25	-//-
AFLA_076180	0	45.03636016	#NAME?	1.61E-08	1.13E-06	-//-
AFLA_076190	0.897103239	13.07698194	-3.8656	0.00058585	0.012624	-//-
AFLA_076240	175.8631201	77.23909153	1.187	0.0014627	0.02696	-	Pyridoxal phosphate-dependent transferase, major region, subdomain 1||Pyridoxal phosphate-dependent transferase||Pyridoxal phosphate-dependent transferase, major region, subdomain 2||Aminotransferase class-III
AFLA_076290	170.5547328	46.89982719	1.8626	4.78E-06	0.00020323	-	Lipopolysaccharide-modifying protein
AFLA_076690	2485.744679	1236.187781	1.0078	0.0026881	0.042642	-//-
AFLA_077020	1680.164601	4563.357183	-1.4415	2.53E-05	0.00092638	-	Ubiquitin domain||Ubiquitin-associated domain||Aspartic peptidase, DDI1-type||UBA-like||Aspartic peptidase domain||Ubiquitin-related domain||DNA damage-inducible protein 1
AFLA_077050	62.54820565	21.59439619	1.5343	0.0012861	0.02442	-	Protein of unknown function DUF3425
AFLA_077060	135.7255151	40.03153966	1.7615	1.71E-05	0.00065339	-	Aldo/keto reductase/potassium channel subunit beta||NADP-dependent oxidoreductase domain
AFLA_077110	81.6950055	33.25097334	1.2969	0.0031568	0.04879	-//-
AFLA_077200	34.10145107	9.955812946	1.7762	0.0015383	0.027908	-	Alpha/Beta hydrolase fold
AFLA_077520	83.62319759	20.90949843	1.9997	9.92E-06	0.00040133	-//-
AFLA_077830	23.90205155	86.77115215	-1.8601	8.81E-05	0.0027252	-	FAD/NAD(P)-binding domain||Glucose-methanol-choline oxidoreductase, N-terminal||Glucose-methanol-choline oxidoreductase||Glucose-methanol-choline oxidoreductase, C-terminal
AFLA_077920	11.2412347	0.888315066	3.6616	0.0011272	0.022066	-	Glutamate decarboxylase||Pyridoxal phosphate-dependent decarboxylase||Pyridoxal phosphate-dependent transferase||Pyridoxal phosphate-dependent transferase, major region, subdomain 1
AFLA_077950	13.922386	153.011416	-3.4582	3.35E-06	0.00014728	-	Wax synthase domain
AFLA_078040	45.59230711	450.5544622	-3.3048	3.77E-16	7.69E-14	-	HAD hydrolase, subfamily IA||Haloacid dehalogenase, type II||HAD-like domain
AFLA_078310	3140.758784	1221.678903	1.3622	0.0013916	0.025994	-//-
AFLA_078320	24208.46398	8108.47937	1.578	1.23E-05	0.00048932	-	Glycoside hydrolase, catalytic domain||Glycoside hydrolase superfamily
AFLA_078790	588.0191107	3820.604044	-2.6999	6.72E-13	8.32E-11	-	Clr5 domain
AFLA_078810	653.7415183	1400.195675	-1.0988	0.0013827	0.025874	-	Endoplasmic reticulum oxidoreductin 1
AFLA_078840	156.3702143	404.9282362	-1.3727	0.00032298	0.0077829	-	Major facilitator superfamily||Major facilitator superfamily domain
AFLA_078920	644.2786116	1875.774466	-1.5417	2.71E-05	0.00098468	-	Zinc finger C2H2-type/integrase DNA-binding domain||Zinc finger, C2H2-like||C2H2- zinc finger protein family
AFLA_079730	375.2710548	147.7213176	1.3451	0.00017394	0.0047273	-//-
AFLA_080860	2078.269537	754.4463005	1.4619	2.12E-05	0.00079068	-//-
AFLA_081480	234.9775893	3815.630756	-4.0213	7.53E-24	3.52E-21	-//-
AFLA_081510	1278.012636	541.7172332	1.2383	0.0006774	0.014352	-	Protein of unknown function DUF3602
AFLA_081540	379.4292209	158.9679755	1.2551	0.00042378	0.009694	-	Glycosyl transferase family 54||Transmembrane protein 246
AFLA_081770	53.01503322	1235.072716	-4.5421	3.94E-08	2.60E-06	-//-
AFLA_081900	24.60637819	33917.23184	-10.429	3.80E-23	1.60E-20	-//-
AFLA_081910	33.97058806	390.605158	-3.5234	4.11E-17	9.26E-15	-	Metallopeptidase, catalytic domain||Putative peptidase domain, HRXXH
AFLA_081920	328.5138871	966.0249479	-1.5561	1.23E-05	0.00048932	-	Zinc/iron permease
AFLA_082240	357.8966569	1582.080179	-2.1442	7.51E-10	6.49E-08	-//-
AFLA_082700	69.55393016	624.6485798	-3.1668	1.21E-06	5.89E-05	-//-
AFLA_082960	3.37824951	84.67258474	-4.6475	0.0001003	0.0030144	-//-
AFLA_083320	165.2232694	45.95359213	1.8462	8.98E-05	0.0027508	-	Major facilitator superfamily domain||Sugar/inositol transporter||Major facilitator, sugar transporter-like
AFLA_083420	136.6491804	49.52381808	1.4643	0.00030259	0.0073762	-	Phosphoesterase
AFLA_083890	3179.187337	777.8889089	2.031	0.00043532	0.0099127	-	NAD(P)-binding domain||Alcohol dehydrogenase, C-terminal||Alcohol dehydrogenase superfamily, zinc-type||Polyketide synthase, enoylreductase domain||GroES-like
AFLA_083950	122.1044949	288.5196352	-1.2406	0.0017128	0.030334	-	Major facilitator superfamily||Major facilitator superfamily domain
AFLA_084310	0.659789813	13.66080507	-4.3719	0.00013836	0.0038997	-//-
AFLA_084370	358.8520494	856.5591094	-1.2552	0.0014254	0.026428	-	Protein of unknown function DUF3445
AFLA_084490	726.3857844	328.4566323	1.145	0.0013231	0.025084	-//-
AFLA_084500	5331.194928	2528.681477	1.0761	0.0024055	0.039198	-	Amino acid permease, conserved site||Amino acid/polyamine transporter I
AFLA_084720	113.2772107	748.530756	-2.7242	1.52E-09	1.24E-07	-	Zn(2)-C6 fungal-type DNA-binding domain
AFLA_084810	48.36017988	149.0405998	-1.6238	0.00011759	0.0033901	-//-
AFLA_084950	4989.648188	1000.296642	2.3185	0.0003937	0.0091551	-//-
AFLA_085010	60.05904988	146.0761771	-1.2823	0.0022747	0.037743	-//-
AFLA_085160	1057.768317	441.991367	1.2589	0.00033617	0.0080547	-	ABC transporter, conserved site||AAA+ ATPase domain||P-loop containing nucleoside triphosphate hydrolase||ABC transporter-like||ABC-2 type transporter
AFLA_085610	6.37523416	51.87826688	-3.0246	0.00025458	0.0064549	-	WD40 repeat, conserved site||WD40 repeat||G-protein beta WD-40 repeat||WD40-repeat-containing domain||WD40/YVTN repeat-like-containing domain
AFLA_085920	176.1811242	376.7091185	-1.0964	0.0015499	0.028078	-	ERV/ALR sulfhydryl oxidase domain
AFLA_086800	1172.405635	3004.585617	-1.3577	0.00028918	0.007118	-	Alpha/beta hydrolase fold-1||Epoxide hydrolase-like||Alpha/Beta hydrolase fold
AFLA_086810	203.5164845	452.1102567	-1.1515	0.0023292	0.038395	-	Aldo/keto reductase/potassium channel subunit beta||NADP-dependent oxidoreductase domain
AFLA_086850	16.9707406	405.8018819	-4.5797	7.82E-24	3.53E-21	-	Protein of unknown function DUF2841
AFLA_087060	30.3081462	205.0231331	-2.758	0.00064739	0.013762	-	Glucose-methanol-choline oxidoreductase, C-terminal||FAD/NAD(P)-binding domain||Glucose-methanol-choline oxidoreductase||Glucose-methanol-choline oxidoreductase, N-terminal
AFLA_087170	2528.654175	12157.06431	-2.2654	1.45E-10	1.42E-08	-//-
AFLA_087210	241.5466151	1654.528128	-2.776	9.48E-14	1.36E-11	-	Spherulation-specific family 4
AFLA_087220	573.646927	6383.265332	-3.4761	8.83E-20	2.66E-17	-	NAD(P)-binding domain
AFLA_087260	480.2626214	230.6766139	1.058	0.0024907	0.040115	-	RmlC-like cupin domain
AFLA_087620	93.25537814	265.0097988	-1.5068	0.00028463	0.0070332	-	NmrA-like domain||NAD(P)-binding domain
AFLA_087980	397.1679665	962.2634124	-1.2767	0.0004077	0.0094244	-//-
AFLA_088030	309.3803784	639.5456635	-1.0477	0.0026722	0.042442	-	Major facilitator superfamily domain||Major facilitator superfamily
AFLA_088570	25137.14801	6743.254771	1.8983	0.00023883	0.0061295	-//-
AFLA_089860	177.1967825	425.7082055	-1.2645	0.00036257	0.0085735	-	Alpha/Beta hydrolase fold||Lipase, secreted
AFLA_090070	388.1975534	152.1778501	1.351	0.00038826	0.0090452	-//-
AFLA_090180	6.550046087	56.05635255	-3.0973	7.72E-05	0.002462	-	Alpha/Beta hydrolase fold||Serine aminopeptidase, S33
AFLA_090210	3203.684077	1145.483647	1.4838	2.49E-05	0.00091642	-	Amino acid/polyamine transporter I
AFLA_090220	283.6846875	55.70603574	2.3484	2.90E-09	2.27E-07	-//-
AFLA_090500	275.3345436	1659.688203	-2.5917	5.24E-08	3.37E-06	-	Mitochondrial carrier domain||Mitochondrial substrate/solute carrier
AFLA_090690	7992.12551	29069.83255	-1.8629	5.18E-08	3.35E-06	-	Catalase, mono-functional, haem-containing||Catalase-like domain||Catalase haem-binding site||Catalase core domain||Catalase, mono-functional, haem-containing, clade 2||Class I glutamine amidotransferase-like||Catalase immune-responsive domain
AFLA_090730	114.399726	40.176989	1.5096	0.00029838	0.0072959	-	Glycoside hydrolase family 1||Glycoside hydrolase superfamily||Glycoside hydrolase, catalytic domain
AFLA_090770	737.5380082	341.2564257	1.1119	0.002809	0.044226	-	Zinc finger, TFIIS-type||DNA-directed RNA polymerase subunit/transcription factor S||DNA-directed RNA polymerase, M/15kDa subunit
AFLA_090960	54.57388315	914.9001698	-4.0673	3.37E-08	2.26E-06	-	FAD-binding 8||Ferric reductase, NAD binding domain||Ferric reductase transmembrane component-like domain||Ferredoxin reductase-type FAD-binding domain||Ferric/cupric reductase transmembrane component 7||Riboflavin synthase-like beta-barrel
AFLA_091070	60.86962426	309.758276	-2.3473	4.80E-08	3.14E-06	-	Protein of unknown function DUF1348||NTF2-like domain
AFLA_091130	106.5963123	354.9741532	-1.7356	5.57E-06	0.00023454	-	Conserved hypothetical protein CHP02453
AFLA_091330	755.4178845	321.4448942	1.2327	0.00042221	0.0096756	-//-
AFLA_091620	138.4789416	756.6060568	-2.4499	0.0017175	0.030374	-	Alpha/Beta hydrolase fold||Serine hydrolase FSH
AFLA_091810	70.34478622	15.87678924	2.1475	1.57E-05	0.00060791	-	Protein of unknown function DUF4246
AFLA_091920	579.8850428	211.3688405	1.456	4.33E-05	0.0015039	-	Nucleotide-diphospho-sugar transferases||Glycosyltransferase, DXD sugar-binding motif
AFLA_092090	253.8286806	86.66745524	1.5503	0.00034307	0.008189	-	Short-chain dehydrogenase/reductase, conserved site||NAD(P)-binding domain||Short-chain dehydrogenase/reductase SDR
AFLA_093660	1049.894757	412.3794648	1.3482	0.00013592	0.0038396	-//-
AFLA_093920	250.40706	52.83143869	2.2448	0.0016126	0.028882	-	Oil body-associated protein-like
AFLA_093990	1469.702734	175.0311781	3.0698	9.52E-16	1.82E-13	-	Sulfatase, N-terminal||Alkaline-phosphatase-like, core domain||Sulfatase, conserved site||Alkaline phosphatase-like, alpha/beta/alpha
AFLA_094010	3616.553065	1074.848984	1.7505	6.24E-07	3.21E-05	-	Basic-leucine zipper domain
AFLA_094090	354.8947534	113.9771621	1.6386	1.97E-05	0.00074261	-//-
AFLA_094110	652.4471216	26.40677036	4.6269	1.86E-27	9.81E-25	-//-
AFLA_094120	14835.94896	654.5952076	4.5024	2.81E-30	1.77E-27	-	Low affinity iron permease, Fet4
AFLA_094180	1367.324697	202.4629422	2.7556	0.00030406	0.0073976	-//-
AFLA_094570	114.8549985	452.0839448	-1.9768	8.42E-07	4.22E-05	-//-
AFLA_094620	459.5357242	1175.780994	-1.3554	0.00010628	0.0031282	-//-
AFLA_095030	136.86792	512.0293107	-1.9034	1.55E-06	7.44E-05	-	Gamma-glutamyltranspeptidase||Nucleophile aminohydrolases, N-terminal
AFLA_095290	39.69990135	11.68070967	1.765	0.0009736	0.019639	-//-
AFLA_095300	222.3134678	67.7008923	1.7153	7.50E-06	0.00031134	-	Ankyrin repeat||Ankyrin repeat-containing domain
AFLA_095410	8.921811933	556.3448107	-5.9625	2.00E-05	0.00075117	-//-
AFLA_095520	250.8082671	59.69026313	2.071	8.91E-08	5.46E-06	-	NAD(P)-binding domain||Alcohol dehydrogenase superfamily, zinc-type||Alcohol dehydrogenase, C-terminal||Polyketide synthase, enoylreductase domain||Alcohol dehydrogenase, N-terminal||GroES-like
AFLA_095630	2164.085367	256.7304624	3.0754	3.46E-16	7.15E-14	-	NAD(P)-binding domain||D-amino-acid oxidase||FAD dependent oxidoreductase||D-amino acid oxidase, conserved site
AFLA_096030	3.467900987	80.8669879	-4.5434	0.0010964	0.021532	-	DSBA-like thioredoxin domain||Thioredoxin-like fold
AFLA_096050	103.6280386	386.844465	-1.9003	0.0012042	0.023179	-	Zn(2)-C6 fungal-type DNA-binding domain||Transcription factor domain, fungi
AFLA_096090	131.3540736	13.65119808	3.2664	3.93E-12	4.59E-10	-	Mitochondrial carrier domain||Mitochondrial substrate/solute carrier
AFLA_096340	157.670065	1096.946224	-2.7985	3.41E-13	4.39E-11	-//-
AFLA_096670	146.6870384	42.59634251	1.7839	0.0010078	0.020104	-//-
AFLA_097260	0.446696362	1235.422547	-11.433	6.11E-63	1.10E-59	-	Dynamin central domain||Dynamin superfamily||Dynamin, GTPase domain||GTPase effector domain||P-loop containing nucleoside triphosphate hydrolase
AFLA_097460	166.2026031	643.5706234	-1.9532	2.57E-07	1.43E-05	-//-
AFLA_097470	920.0966885	3456.23661	-1.9093	4.70E-07	2.49E-05	-	Cytochrome P450, E-class, group I||Cytochrome P450, conserved site||Cytochrome P450
AFLA_097700	335.2992472	53.04221469	2.6602	0.00022919	0.0059424	-	Metallo-beta-lactamase
AFLA_097750	0.598068826	840.4973854	-10.457	2.84E-55	4.48E-52	-//-
AFLA_097820	700.451176	1862.22488	-1.4107	0.00013337	0.0037758	-	Alcohol dehydrogenase, zinc-type, conserved site||GroES-like||Polyketide synthase, enoylreductase domain||Alcohol dehydrogenase, N-terminal||Alcohol dehydrogenase superfamily, zinc-type||Alcohol dehydrogenase, C-terminal||NAD(P)-binding domain
AFLA_097890	2936.121997	10668.67093	-1.8614	5.23E-07	2.73E-05	-	Glycosyl hydrolase family 32, N-terminal||Glycosyl hydrolase family 32, C-terminal||Concanavalin A-like lectin/glucanase domain||Glycoside hydrolase, family 32||Glycosyl hydrolase, five-bladed beta-propellor domain
AFLA_098550	1104.998967	440.0655313	1.3283	0.00015332	0.0042737	-	Nitrilase/cyanide hydratase, conserved site||Carbon-nitrogen hydrolase
AFLA_098910	52.37205299	273.1016343	-2.3826	1.40E-07	8.23E-06	-	Major facilitator superfamily domain
AFLA_099070	340.5707225	66919.29478	-7.6183	5.10E-18	1.26E-15	-//-
AFLA_099080	44.87411097	6915.852069	-7.2679	4.61E-09	3.52E-07	-	Protein of unknown function DUF3328
AFLA_099090	0.958824227	117.7059413	-6.9397	2.04E-11	2.24E-09	-//-
AFLA_099220	10283.4155	25469.89523	-1.3085	0.00034744	0.0082619	-//-
AFLA_099290	1420.990568	636.7347324	1.1581	0.0014141	0.026336	-	Small GTP-binding protein domain||Small GTPase superfamily, Ras type||Small GTPase superfamily||P-loop containing nucleoside triphosphate hydrolase
AFLA_099710	292.3131005	643.3304523	-1.138	0.003056	0.047522	-	Short-chain dehydrogenase/reductase SDR||NAD(P)-binding domain
AFLA_099760	134.060418	2569.036226	-4.2603	8.21E-08	5.11E-06	-//-
AFLA_099940	109.0335203	248.5071177	-1.1885	0.0011855	0.022924	-//-
AFLA_100110	42093.05532	17972.7231	1.2278	0.00037488	0.008815	-	HAD-like domain||P-type ATPase, cytoplasmic domain N||P-type ATPase, transmembrane domain||P-type ATPase||P-type ATPase, subfamily IIIA||P-type ATPase, A domain||P-type ATPase, phosphorylation site
AFLA_100120	3767.063082	1620.698767	1.2168	0.0004357	0.0099127	-	P-type ATPase, A domain||Cation-transporting P-type ATPase, N-terminal
AFLA_100200	120.5222162	1065.501522	-3.1442	3.63E-05	0.001284	-	Syntaxin, N-terminal domain||t-SNARE||Target SNARE coiled-coil homology domain
AFLA_100210	9.213425315	121.5102394	-3.7212	2.10E-05	0.00078375	-	Ankyrin repeat-containing domain||Ankyrin repeat
AFLA_100220	7.385428339	102.4471464	-3.7941	4.53E-06	0.00019402	-//-
AFLA_100260	46.32748361	422.9364802	-3.1905	2.99E-07	1.64E-05	-	Bacteriophage T5, Orf172 DNA-binding
AFLA_100600	2567.792152	880.2927964	1.5445	8.07E-06	0.00033203	-	FAD-binding domain||FAD/NAD(P)-binding domain
AFLA_100610	652.0916159	267.1249481	1.2876	0.00022869	0.0059418	-//-
AFLA_100620	3315.104926	1191.50199	1.4763	1.33E-05	0.00052793	-	Major facilitator superfamily domain||Major facilitator superfamily
AFLA_101040	88.51733188	525.2200357	-2.5689	9.96E-06	0.000402	-	Ras guanine nucleotide exchange factor domain
AFLA_101300	157.1546118	400.7006654	-1.3503	0.00050606	0.011191	-//-
AFLA_101370	0	31.90404229	#NAME?	1.79E-11	1.98E-09	-	Caspase-like domain
AFLA_101630	19.65013826	311.4883595	-3.9866	5.59E-05	0.0018513	-//-
AFLA_101770	6460.421778	753.303004	3.1003	5.94E-15	1.01E-12	-	Histidine phosphatase superfamily
AFLA_101780	20719.95992	7127.302487	1.5396	0.00017409	0.0047273	-	Immunoglobulin E-set||Oxidoreductase, molybdopterin-binding domain||Eukaryotic molybdopterin oxidoreductase||Moybdenum cofactor oxidoreductase, dimerisation
AFLA_101800	272.640282	10.25187	4.733	0.0013664	0.025714	-	Glycoside hydrolase, catalytic domain||Glycoside hydrolase family 18, catalytic domain||Glycoside hydrolase, chitinase active site||Glycoside hydrolase superfamily||Carbohydrate-binding module family 19
AFLA_101900	1382.807972	519.1009181	1.4135	0.0018343	0.031824	-	Major facilitator superfamily||Major facilitator superfamily domain
AFLA_102410	337.5952422	98.67444514	1.7745	9.45E-05	0.0028616	-	Protein of unknown function DUF2945
AFLA_102530	16.61194208	48.4561223	-1.5445	0.0018908	0.032572	-	S-adenosyl-L-methionine-dependent methyltransferase
AFLA_104380	43.8473211	120.9504626	-1.4639	0.00050838	0.011203	-//-
AFLA_104630	180.0328136	38.90105331	2.2104	8.20E-08	5.11E-06	-	Brefeldin A sensitivity protein-related, domain of unknown function DUF2421||Putative ER transporter, 6TM, N-terminal
AFLA_104680	22.61059502	0	Inf	0.0013581	0.025595	-	Glycoside hydrolase superfamily||Chitinase II||Chitinase insertion domain||Glycoside hydrolase, chitinase active site||Glycoside hydrolase family 18, catalytic domain||Glycoside hydrolase, catalytic domain
AFLA_104830	3.257737539	145.2797711	-5.4788	7.78E-11	7.86E-09	-//-
AFLA_104870	8.141510149	38.22941303	-2.2313	0.00026087	0.0065487	-//-
AFLA_104880	27.21584268	0	Inf	0.00029572	0.0072646	-	Glycoside hydrolase, catalytic domain||Glycoside hydrolase, family 25||Glycoside hydrolase, family 25 subgroup||Glycoside hydrolase superfamily
AFLA_104890	6.285582683	44.3985171	-2.8204	2.80E-06	0.00012541	-	Glycoside hydrolase, catalytic domain||Glycoside hydrolase, family 2, immunoglobulin-like beta-sandwich||Glycosyl hydrolases family 2, sugar binding domain||Glycoside hydrolase family 2, catalytic domain||Glycoside hydrolase, family 2/20, immunoglobulin-like beta-sandwich domain||Galactose-binding domain-like||Glycoside hydrolase superfamily
AFLA_105060	26.5382808	1.785065009	3.894	3.72E-05	0.0013117	-	P-loop containing nucleoside triphosphate hydrolase
AFLA_105280	70.23988619	291.5503857	-2.0534	0.00093823	0.019016	-	Cellobiose dehydrogenase, cytochrome domain
AFLA_105480	201.4763672	46.48671007	2.1157	8.58E-08	5.29E-06	-	Mss4-like||Glutathione-dependent formaldehyde-activating enzyme/centromere protein V
AFLA_105490	440.67718	56.5187247	2.9629	3.65E-14	5.81E-12	-	P-loop containing nucleoside triphosphate hydrolase||Phosphoribulokinase/uridine kinase
AFLA_105630	2.831550636	1906.838015	-9.3954	7.23E-10	6.34E-08	-	Cytochrome P450||Cytochrome P450, conserved site||Cytochrome P450, E-class, group I
AFLA_106880	9420.814471	3248.769274	1.536	0.0001045	0.0031048	-	Aldo/keto reductase||Aldo/keto reductase/potassium channel subunit beta||NADP-dependent oxidoreductase domain
AFLA_107320	587.3974204	1895.151688	-1.6899	3.62E-06	0.00015811	-//-
AFLA_107540	34.26591196	9.422599076	1.8626	0.0011622	0.022629	-	Transketolase-like, pyrimidine-binding domain||Thiamin diphosphate-binding fold||Transketolase C-terminal/Pyruvate-ferredoxin oxidoreductase domain II||Transketolase, C-terminal domain||Transketolase binding site||Transketolase family||Transketolase, N-terminal
AFLA_107550	128.0965286	46.20766667	1.471	0.00047997	0.010702	-	Alcohol dehydrogenase, C-terminal||Alcohol dehydrogenase superfamily, zinc-type||NAD(P)-binding domain||Alcohol dehydrogenase, zinc-type, conserved site||Polyketide synthase, enoylreductase domain||Alcohol dehydrogenase, N-terminal||GroES-like
AFLA_107670	57.96698536	8.019112009	2.8537	2.54E-07	1.42E-05	-	Quinoprotein alcohol dehydrogenase-like superfamily||Six-bladed beta-propeller, TolB-like
AFLA_107680	26.25878272	5.641741025	2.2186	0.00085438	0.017542	-//-
AFLA_107800	230.3745017	1022.626904	-2.1502	7.97E-05	0.0025298	-	Pectin lyase fold||Pectate lyase superfamily protein||Pectin lyase fold/virulence factor
AFLA_107840	57.69763507	477.0957049	-3.0477	0.0011631	0.022629	-	AMP-binding enzyme C-terminal domain||AMP-dependent synthetase/ligase||AMP-binding, conserved site
AFLA_107860	189.1884423	5082.592987	-4.7477	1.33E-17	3.11E-15	-//-
AFLA_107980	0.927963733	18.7849819	-4.3394	1.63E-05	0.00062525	-//-
AFLA_108050	109.9019019	293.4263391	-1.4168	0.00025676	0.0064972	-	Heterokaryon incompatibility
AFLA_108250	7.241476906	216.0224404	-4.8988	9.47E-13	1.16E-10	-	Major facilitator superfamily||Major facilitator superfamily domain
AFLA_108260	138.3771642	3028.236462	-4.4518	9.25E-16	1.80E-13	-	Ammonium transporter||Ammonium transporter AmtB-like domain||Ammonium/urea transporter
AFLA_108370	6.457464606	42.09452393	-2.7046	7.82E-06	0.00032374	-	Uncharacterised domain, di-copper centre||Tyrosinase copper-binding domain
AFLA_108410	915.9656181	5311.914192	-2.5359	4.15E-12	4.81E-10	-	Renal dipeptidase family||Metal-dependent hydrolase
AFLA_108690	44.89110252	303.6417319	-2.7579	2.48E-07	1.39E-05	-	Alpha/Beta hydrolase fold||Alpha/beta hydrolase fold-1
AFLA_108810	717.9209118	1638.683356	-1.1906	0.00026852	0.0067009	-	Pyridoxamine 5'-phosphate oxidase-like, FMN-binding domain||FMN-binding split barrel
AFLA_108940	53.21562614	191.5551776	-1.8478	1.89E-05	0.00071697	-	Alpha/Beta hydrolase fold||Alpha/beta hydrolase fold-3
AFLA_109070	8.083499677	76.23010413	-3.2373	1.51E-05	0.00059079	-	Nucleoside phosphorylase||Nucleoside phosphorylase domain||Ankyrin repeat-containing domain||P-loop containing nucleoside triphosphate hydrolase||Ankyrin repeat
AFLA_109280	23.41433627	1375.660524	-5.8766	2.06E-38	1.73E-35	-//-
AFLA_109290	0.659789813	68.95039921	-6.7074	3.01E-17	6.91E-15	-	Cytochrome P450||Cytochrome P450, E-class, group IV||Cytochrome P450, conserved site
AFLA_109480	67.21929074	277.109331	-2.0435	0.0014733	0.026996	-	Glycoside hydrolase family 71
AFLA_110190	98.68742129	31.2492238	1.659	0.0018781	0.032397	-	Peptidase S1, PA clan||Serine proteases, trypsin domain||Peptidase S1A, chymotrypsin family
AFLA_110210	82.1631738	4.009532022	4.357	0.0012668	0.024131	-	Serine proteases, trypsin domain||Peptidase S1, PA clan||Peptidase S1A, chymotrypsin family
AFLA_110230	803.60909	152.9371157	2.3936	1.08E-09	9.17E-08	-	Protein of unknown function DUF1772
AFLA_110410	472.1447439	182.608774	1.3705	0.00010821	0.003163	-	Sugar transporter, conserved site||Major facilitator superfamily domain||Major facilitator, sugar transporter-like
AFLA_110650	4672.282123	2062.929543	1.1794	0.00046305	0.010441	-	Zinc finger, C2H2-like||Zinc finger C2H2-type/integrase DNA-binding domain||Zinc finger, C2H2
AFLA_110870	76.05144056	22.71138523	1.7436	0.00018606	0.0049986	-//-
AFLA_110880	144.3635305	31.20354282	2.2099	2.16E-07	1.24E-05	-//-
AFLA_110890	605.539138	146.4081837	2.0482	3.77E-08	2.51E-06	-	FAD linked oxidase, N-terminal||FAD-binding, type 2, subdomain 1||Berberine/berberine-like||CO dehydrogenase flavoprotein-like, FAD-binding, subdomain 2||FAD-binding, type 2
AFLA_111090	28.38113047	89.95703399	-1.6643	5.17E-05	0.0017375	-//-
AFLA_111250	129.0293793	495.4027864	-1.9409	1.00E-07	6.05E-06	-//-
AFLA_111830	81.42234055	28.99467752	1.4896	0.00084168	0.017366	-//-
AFLA_111960	511.2530031	1185.669449	-1.2136	0.0011191	0.021943	-//-
AFLA_112100	1622.943562	721.237434	1.1701	0.0004666	0.010484	-//-
AFLA_112800	124.4034083	42.99980468	1.5326	0.00021264	0.0056171	-	Alpha-hydroxy acid dehydrogenase, FMN-dependent||FMN-dependent dehydrogenase||Aldolase-type TIM barrel
AFLA_112820	421.1130146	976.70253	-1.2137	0.00055548	0.012093	-	NAD(P)-binding domain||Short-chain dehydrogenase/reductase SDR
AFLA_112830	238.0902203	111.4386921	1.0953	0.0027219	0.042961	-	Transcription factor domain, fungi||Zn(2)-C6 fungal-type DNA-binding domain
AFLA_113300	728.9850586	94.12316844	2.9533	5.86E-15	1.01E-12	-	FAD/NAD(P)-binding domain||FAD-binding domain
AFLA_113310	51.42436031	6.656483317	2.9496	2.20E-07	1.25E-05	-	Domain of unknown function DUF3533
AFLA_113350	89.62810583	213.7588454	-1.254	0.0017895	0.031167	-//-
AFLA_113430	305.9845494	106.1109061	1.5279	8.42E-05	0.0026378	-	Amine oxidase||FAD/NAD(P)-binding domain
AFLA_113570	649.2684919	262.6290269	1.3058	0.00033582	0.0080547	-	Mitochondrial carrier domain||Mitochondrial substrate/solute carrier
AFLA_113790	382.6287346	1991.799252	-2.3801	5.13E-08	3.34E-06	-	Basic-leucine zipper domain
AFLA_114100	16148.28411	6961.746299	1.2139	0.00031974	0.0077469	-	Protein of unknown function DUF1761
AFLA_114700	1445.474231	57.7139239	4.6465	1.27E-29	7.62E-27	-	Amino acid/polyamine transporter I
AFLA_114710	267.6915477	9.059110968	4.8851	8.53E-08	5.28E-06	-//-
AFLA_114750	63.43027422	145.139597	-1.1942	0.0020024	0.034121	-	Amidase||Amidase signature domain||Amidase, conserved site
AFLA_115050	30.61362852	99.37396435	-1.6987	0.00015759	0.0043733	-	Zinc finger, RING-type, conserved site||E3 ubiquitin ligase RBR family||IBR domain||Zinc finger, RING/FYVE/PHD-type||Zinc finger, RING-type
AFLA_115900	17.14086889	1008.701277	-5.8789	7.31E-39	6.60E-36	-	Cytochrome P450, conserved site||Cytochrome P450, E-class, group I||Cytochrome P450
AFLA_115910	17.6949888	333.8109542	-4.2376	1.80E-21	6.23E-19	-//-
AFLA_115990	16.86976497	75.41429229	-2.1604	3.79E-06	0.00016298	-//-
AFLA_116000	2.986633616	624.8807979	-7.7089	1.02E-44	1.07E-41	-	Phytanoyl-CoA dioxygenase
AFLA_116040	79.75509395	31.27097387	1.3508	0.0029643	0.046315	-	Pectin lyase fold||Pectate lyase/Amb allergen||Pectin lyase fold/virulence factor
AFLA_116420	519.1507838	151.927522	1.7728	9.54E-07	4.76E-05	-	Alpha/beta hydrolase fold-1||Alpha/Beta hydrolase fold
AFLA_116430	10.53378545	89.74444138	-3.0908	2.02E-06	9.53E-05	-	NAD(P)-binding domain||UDP-glucose/GDP-mannose dehydrogenase, N-terminal||6-phosphogluconate dehydrogenase C-terminal domain-like||UDP-glucose/GDP-mannose dehydrogenase, C-terminal||UDP-glucose/GDP-mannose dehydrogenase||UDP-glucose 6-dehydrogenase, bacterial type||UDP-glucose/GDP-mannose dehydrogenase, dimerisation
AFLA_116460	89.46735545	282.5420834	-1.659	4.57E-05	0.0015649	-	Alpha/Beta hydrolase fold||Serine hydrolase FSH
AFLA_116600	118.1307108	11.89256185	3.3123	0.00020761	0.005519	-	Aromatic prenyltransferase, DMATS type
AFLA_116640	583.8711562	233.4277035	1.3227	0.0002823	0.0069893	-	Acyl-CoA N-acyltransferase||GNAT domain
AFLA_116650	115.2608892	44.93777366	1.3589	0.00076002	0.015942	-	Pectin lyase fold/virulence factor||Pectate lyase/Amb allergen||Pectin lyase fold
AFLA_116680	28.9672766	299.4359307	-3.3698	3.76E-15	6.69E-13	-	PAS-associated, C-terminal||PAS domain
AFLA_116940	69.61292439	25.90485584	1.4261	0.0020714	0.034921	-//-
AFLA_117370	280.5788896	107.7933886	1.3801	0.00016698	0.0045935	-	RmlC-like cupin domain||RmlC-like jelly roll fold||Cupin 2, conserved barrel
AFLA_117550	0	430.707768	#NAME?	0.0021661	0.036131	-	Protein-tyrosine phosphatase, catalytic||Tyrosine specific protein phosphatases domain||PTP type protein phosphatase||Protein-tyrosine phosphatase-like
AFLA_117580	51.7878531	8.577534579	2.594	3.39E-05	0.0012083	-	Cytochrome P450||Cytochrome P450, E-class, group I
AFLA_117670	389.136404	1162.326298	-1.5787	1.60E-05	0.00061712	-	Glycosyl transferase, family 1
AFLA_117820	780.2680441	339.729644	1.1996	0.00074326	0.015616	-	Zn(2)-C6 fungal-type DNA-binding domain||Transcription factor domain, fungi
AFLA_118040	10.37128144	37.92609321	-1.8706	0.00077368	0.016153	-	Inosine triphosphate pyrophosphatase||Inosine triphosphate pyrophosphatase-like||Ham1-like protein
AFLA_118270	149.9356007	1250.817378	-3.0605	2.13E-07	1.22E-05	-	Beta-lactamase/transpeptidase-like||Beta-lactamase-related
AFLA_118320	23.70008964	100.5844295	-2.0854	4.78E-05	0.0016324	-//-
AFLA_118420	21.39004478	369.6013569	-4.111	1.45E-20	4.58E-18	-	Cyanovirin-N
AFLA_118490	22.13870556	8760.66234	-8.6283	1.72E-68	4.34E-65	-//-
AFLA_118630	152.2184961	615.1372357	-2.0148	0.0002488	0.0063339	-	Vanillyl-alcohol oxidase, C-terminal subdomain 2||FAD-linked oxidase, C-terminal||FAD linked oxidase, N-terminal||FAD-binding, type 2||CO dehydrogenase flavoprotein-like, FAD-binding, subdomain 2||FAD-linked oxidase-like, C-terminal||FAD-binding, type 2, subdomain 1
AFLA_118890	9.932006112	79.52850147	-3.0013	1.17E-08	8.57E-07	-	Translation protein SH3-like domain||Ribosomal protein L2 domain 2||Nucleic acid-binding, OB-fold||Translation elongation factor IF5A||Translation elongation factor, IF5A C-terminal
AFLA_119040	4.666968643	1033.90346	-7.7914	6.36E-10	5.69E-08	-	LysM domain
AFLA_119210	2189.737516	5165.096113	-1.238	0.00058322	0.01261	-//-
AFLA_119330	2197.463308	1045.786497	1.0713	0.0021597	0.03612	-	Glutathione S-transferase, C-terminal-like||Glutathione S-transferase, C-terminal
AFLA_119460	8528.966883	4255.652424	1.003	0.0030194	0.04701	-	NAD(P)-binding domain||NAD-dependent epimerase/dehydratase, N-terminal domain
AFLA_119710	82.06084039	413.3960229	-2.3328	0.00019594	0.0052417	-	Hydroxymethylglutaryl-coenzyme A synthase, active site||Hydroxymethylglutaryl-CoA synthase, eukaryotic||Hydroxymethylglutaryl-coenzyme A synthase, N-terminal||Hydroxymethylglutaryl-coenzyme A synthase C-terminal domain||Thiolase-like
AFLA_119770	1653.016856	258.8852501	2.6747	0.00017404	0.0047273	-//-
AFLA_119780	1605.512823	27.7525293	5.8543	0.00055337	0.012068	-	Metallopeptidase, catalytic domain||Peptidase M35, deuterolysin
AFLA_119810	781.4082783	290.0076629	1.43	3.79E-05	0.0013337	-	Histidine kinase-like ATPase, C-terminal domain||Signal transduction histidine kinase, dimerisation/phosphoacceptor domain||Signal transduction histidine kinase-related protein, C-terminal||CheY-like superfamily||Histidine kinase domain||HAMP domain||Signal transduction response regulator, receiver domain
AFLA_119820	34.03582696	5.167475365	2.7195	1.40E-05	0.00055426	-	Male sterility, NAD-binding||NAD(P)-binding domain||Phosphopantetheine binding ACP domain||Thioester reductase-like domain||AMP-dependent synthetase/ligase
AFLA_120280	23.2004623	360.3405702	-3.9571	3.16E-11	3.35E-09	-	ABC transporter-like||P-loop containing nucleoside triphosphate hydrolase||ABC transporter, conserved site||ABC transporter type 1, transmembrane domain||AAA+ ATPase domain
AFLA_120570	1707.451608	626.5136626	1.4464	2.70E-05	0.00098257	-	Short-chain dehydrogenase/reductase SDR||NAD(P)-binding domain||Short-chain dehydrogenase/reductase, conserved site
AFLA_120660	51.04035805	6.267642612	3.0256	9.36E-08	5.71E-06	-//-
AFLA_120700	22.83951429	177.3550582	-2.957	1.34E-08	9.69E-07	-	FAD-binding, type 2, subdomain 1||Berberine/berberine-like||FAD-binding, type 2||FAD linked oxidase, N-terminal
AFLA_121060	118.248496	45.71063246	1.3712	0.00083298	0.017214	-	TauD/TfdA-like domain
AFLA_121080	111.7396721	268.7568596	-1.2662	0.0008511	0.017503	-	FMN-dependent dehydrogenase||FMN-dependent alpha-hydroxy acid dehydrogenase, active site||Aldolase-type TIM barrel||Alpha-hydroxy acid dehydrogenase, FMN-dependent
AFLA_121100	65.63367605	23.79355857	1.4639	0.002547	0.04071	-//-
AFLA_121330	759.0508225	1616.587004	-1.0907	0.0025948	0.041318	-	S-adenosyl-L-methionine-dependent methyltransferase
AFLA_121360	1233.173974	603.1800151	1.0317	0.0025359	0.040585	-	Protein of unknown function DUF2406
AFLA_121640	3.976318336	24.24851432	-2.6084	0.00039893	0.0092598	-	DHBP synthase RibB-like alpha/beta domain||YrdC-like domain
AFLA_121680	48.49476404	6.326686752	2.9383	0.00092453	0.018769	-	Cytochrome P450, E-class, group I||Cytochrome P450, conserved site||Cytochrome P450
AFLA_121860	406.9435739	76.59890424	2.4094	0.00048057	0.010702	-//-
AFLA_121870	559.6976687	116.9132914	2.2592	0.0017606	0.03079	-//-
AFLA_121880	1093.141602	359.7183447	1.6035	0.0023529	0.038585	-	Amino acid/polyamine transporter I
AFLA_121890	1238.623862	386.1374515	1.6816	3.32E-06	0.00014639	-	Cytochrome P450, conserved site||Cytochrome P450, E-class, group IV||Cytochrome P450
AFLA_122000	96.74087986	247.8067044	-1.357	0.00025924	0.0065338	-	Aminoglycoside phosphotransferase||Protein kinase-like domain
AFLA_122010	16.24180877	92.66653602	-2.5123	1.01E-06	4.99E-05	-	Methylaspartate ammonia-lyase, N-terminal||Enolase N-terminal domain-like||Methylaspartate ammonia-lyase||Mandelate racemase/muconate lactonizing enzyme/methylaspartate ammonia-lyase||Enolase C-terminal domain-like||Methylaspartate ammonia-lyase, C-terminal
AFLA_122020	130.392512	429.2816308	-1.7191	5.44E-05	0.0018111	-	Isopenicillin N synthase-like||Oxoglutarate/iron-dependent dioxygenase||Non-haem dioxygenase N-terminal domain
AFLA_122200	0.299034413	44.96531684	-7.2324	0.0023646	0.038726	-	Protein of unknown function DUF3632
AFLA_122400	279.5036699	1856.50451	-2.7316	0.00027902	0.0069218	-	Immunoglobulin-like fold||Glycoside hydrolase family 15/Phosphorylase b kinase regulatory chain family||Glucoamylase||Carbohydrate binding module family 20||Six-hairpin glycosidase||Carbohydrate-binding-like fold||Six-hairpin glycosidase-like||Glucoamylase, starch-binding
AFLA_122840	104.4398	15.86006338	2.7192	0.00016472	0.0045513	-	Protein of unknown function DUF2278
AFLA_123160	325.4565611	666.925462	-1.0351	0.00284	0.044548	-	Multicopper oxidase, type 2||Multicopper oxidase, copper-binding site||Multicopper oxidases, conserved site||Multicopper oxidase, type 3||Multicopper oxidase, type 1||L-ascorbate oxidase, fungi||Cupredoxin
AFLA_123310	112.873105	17.26345452	2.7089	2.03E-09	1.62E-07	-	YrdC-like domain||DHBP synthase RibB-like alpha/beta domain
AFLA_123420	67.44818874	17.02751778	1.9859	2.89E-05	0.0010443	-	Leucine-rich repeat domain, L domain-like
AFLA_123570	22.14612659	131.8383418	-2.5736	1.30E-06	6.31E-05	-	Amino acid/polyamine transporter I
AFLA_124060	23.53094511	96.04562189	-2.0292	7.63E-05	0.0024451	-	Beta-lactamase/transpeptidase-like||Beta-lactamase-related
AFLA_124310	38.57973884	4.228599001	3.1896	0.00063784	0.013582	-	Rhamnogalacturonan lyase, domain III||Carbohydrate-binding-like fold||Rhamnogalacturonan lyase, domain II||Glycoside hydrolase-type carbohydrate-binding||Galactose-binding domain-like||Galactose mutarotase-like domain||Carboxypeptidase, regulatory domain
AFLA_124500	343.0503603	6.08952994	5.8159	8.47E-32	5.94E-29	-	Flavodoxin/nitric oxide synthase||Nitric oxide synthase, N-terminal||Flavoprotein-like domain||Flavoprotein pyridine nucleotide cytochrome reductase||Oxidoreductase FAD/NAD(P)-binding||Riboflavin synthase-like beta-barrel||Ferredoxin reductase-type FAD-binding domain
AFLA_125400	1476.224603	600.9369501	1.2966	0.00026603	0.0066651	-	Metal-dependent hydrolase, composite domain||Metal-dependent hydrolase||Rieske [2Fe-2S] iron-sulphur domain||Amidohydrolase-related
AFLA_125420	35.59584262	90.61076655	-1.348	0.0025565	0.04081	-//-
AFLA_125510	34.10594209	3.070655658	3.4734	4.84E-05	0.0016482	-	Major facilitator superfamily domain
AFLA_126340	465.1470597	1003.0902	-1.1087	0.0014662	0.02696	-	Major facilitator, sugar transporter-like||Sugar/inositol transporter||Major facilitator superfamily domain||Sugar transporter, conserved site
AFLA_126350	55.30379874	129.9719917	-1.2328	0.0021135	0.035489	-//-
AFLA_126530	69.56935005	587.4535937	-3.078	4.81E-14	7.41E-12	-	Uncharacterised protein family CsiD
AFLA_126540	322.0971855	1381.753303	-2.1009	4.72E-08	3.11E-06	-//-
AFLA_126550	4.794121133	72.03871301	-3.9094	1.79E-07	1.04E-05	-	Ornithine decarboxylase||Orn/DAP/Arg decarboxylase 2, C-terminal||Alanine racemase/group IV decarboxylase, C-terminal
AFLA_126560	139.6547412	1869.69659	-3.7429	1.02E-20	3.32E-18	-//-
AFLA_126620	329.6846077	763.317329	-1.2112	0.00099238	0.01986	-	Cytochrome P450||Cytochrome P450, E-class, group I||Cytochrome P450, conserved site
AFLA_126650	77.14053989	16.26558198	2.2457	2.46E-06	0.00011177	-	Cytochrome P450||Cytochrome P450, E-class, group I||Cytochrome P450, conserved site
AFLA_126780	14.59604475	1.547956162	3.2371	0.0029769	0.046406	-	Fibronectin type III-like domain||Glycoside hydrolase family 3 C-terminal domain||Glycoside hydrolase, family 3, N-terminal||Glycoside hydrolase superfamily||Glycoside hydrolase family 3
AFLA_126970	41.02241098	233.7973489	-2.5108	0.0011952	0.023041	-	Amino acid/polyamine transporter I||Amino acid permease/ SLC12A domain
AFLA_126980	35.65073048	102.6613907	-1.5259	0.00092269	0.018761	-//-
AFLA_128050	0	8.981976994	#NAME?	0.00033975	0.0081251	-	Serine hydrolase FSH||Alpha/Beta hydrolase fold
AFLA_128070	24.4421099	232.0310857	-3.2469	2.23E-13	2.96E-11	-	GTP binding domain||P-loop containing nucleoside triphosphate hydrolase
AFLA_128080	23.37312474	229.1857316	-3.2936	1.52E-13	2.05E-11	-	Guanylate-binding protein, N-terminal||P-loop containing nucleoside triphosphate hydrolase
AFLA_128120	684.7587828	1588.16614	-1.2137	0.001338	0.025291	-	Concanavalin A-like lectin/glucanase domain||Glycoside hydrolase, family 16, CRH1, predicted||Glycoside hydrolase family 16
AFLA_128330	71.89581927	618.7379405	-3.1053	1.74E-15	3.23E-13	-	S-adenosyl-L-methionine-dependent methyltransferase
AFLA_128420	190.3386529	88.21194303	1.1095	0.0027215	0.042961	-	Transcription factor domain, fungi||Zn(2)-C6 fungal-type DNA-binding domain
AFLA_128480	215.6319608	49.7211927	2.1166	4.34E-05	0.0015039	-	Fibronectin type III-like domain||Glycoside hydrolase, family 3, active site||Glycoside hydrolase, family 3, N-terminal||Glycoside hydrolase family 3 C-terminal domain||Glycoside hydrolase superfamily||Glycoside hydrolase family 3
AFLA_128510	618.2437532	143.9047693	2.1031	4.45E-07	2.38E-05	-	6-phosphogluconate dehydrogenase, C-terminal||6-phosphogluconate dehydrogenase, domain 2||6-phosphogluconate dehydrogenase C-terminal domain-like||6-phosphogluconate dehydrogenase||6-phosphogluconate dehydrogenase, decarboxylating||NAD(P)-binding domain||6-phosphogluconate dehydrogenase, NADP-binding
AFLA_128520	500.1139517	98.97430633	2.3371	6.78E-10	5.99E-08	-	Xylose isomerase-like, TIM barrel domain
AFLA_128690	923.7676096	233.3693518	1.9849	2.53E-06	0.00011405	-//-
AFLA_129530	62.25190863	148.6412775	-1.2556	0.0011703	0.0227	-	Zn(2)-C6 fungal-type DNA-binding domain
AFLA_129840	50.93762879	249.6430502	-2.2931	2.88E-07	1.59E-05	-//-
AFLA_129980	463.8743483	194.0469766	1.2573	0.00056303	0.012236	-	NTF2-like domain
AFLA_131200	94.72692877	262.4936642	-1.4704	0.00081991	0.017	-	Nucleotide-binding alpha-beta plait domain||YTH domain||RNA recognition motif domain
AFLA_131310	1238.177778	4399.885695	-1.8292	1.72E-05	0.0006548	-//-
AFLA_131320	0.893392724	13.70171141	-3.9389	0.00014804	0.0041355	-//-
AFLA_131360	428.2974228	182.6223597	1.2297	0.00062974	0.013455	-//-
AFLA_131370	3551.882871	1619.303132	1.1332	0.00098661	0.019851	-	HAD-superfamily hydrolase, subfamily IIB||Glycosyl transferase, family 20||HAD-like domain||Trehalose-phosphatase
AFLA_131740	270.0898756	619.753998	-1.1983	0.0015011	0.027391	-	Extradiol aromatic ring-opening dioxygenase, DODA type||Extradiol ring-cleavage dioxygenase, class III enzyme, subunit B
AFLA_131810	81.00807634	233.4249373	-1.5268	2.95E-05	0.0010629	-	Major facilitator superfamily domain||Thioredoxin-like fold||FAD/NAD(P)-binding domain||FAD-binding domain||Major facilitator superfamily
AFLA_131930	52.21695937	7.401501403	2.8186	0.00040826	0.0094244	-//-
AFLA_132250	393.4764492	138.7653167	1.5036	6.59E-05	0.0021615	-	Major facilitator superfamily domain||Major facilitator superfamily
AFLA_132480	196.8967297	32.30253795	2.6077	9.33E-10	7.96E-08	-	DNA glycosylase
AFLA_132540	6333.049254	2904.633912	1.1245	0.0014179	0.02634	-	Thioredoxin, conserved site||Thioredoxin domain||Thioredoxin||Thioredoxin-like fold
AFLA_132750	39.90283638	5.337249091	2.9023	1.16E-06	5.68E-05	-	Six-hairpin glycosidase-like
AFLA_132980	27.37952306	325.5030884	-3.5715	1.65E-08	1.16E-06	-	Fork head domain||Winged helix-turn-helix DNA-binding domain||Fork head domain conserved site 2
AFLA_133100	347.2795934	72.86822377	2.2527	2.98E-09	2.32E-07	-	Aldo/keto reductase||Aldo/keto reductase, conserved site||Aldo/keto reductase/potassium channel subunit beta||NADP-dependent oxidoreductase domain
AFLA_133810	316.0126342	673.9424948	-1.0926	0.0024833	0.040099	-//-
AFLA_133830	238.9988296	595.5197716	-1.3171	0.00071922	0.015212	-	Alcohol dehydrogenase, C-terminal||Alcohol dehydrogenase superfamily, zinc-type||NAD(P)-binding domain||Alcohol dehydrogenase, zinc-type, conserved site||Polyketide synthase, enoylreductase domain||Alcohol dehydrogenase, N-terminal||GroES-like
AFLA_134380	13.97004544	84.78360212	-2.6014	1.86E-07	1.08E-05	-	FAD/NAD(P)-binding domain
AFLA_134390	15.4681475	98.88718164	-2.6765	2.70E-08	1.85E-06	-	FAD/NAD(P)-binding domain||FAD dependent oxidoreductase
AFLA_135200	20.99491098	1376.218492	-6.0345	2.23E-10	2.12E-08	-	EF-Hand 1, calcium-binding site||EF-hand domain||EF-hand domain pair
AFLA_135390	409.2461238	133.2382263	1.619	0.00014145	0.0039692	-//-
AFLA_136390	43.67836918	125.6447964	-1.5244	0.00026949	0.0067009	-//-
AFLA_136710	1113.666816	498.8588527	1.1586	0.00062534	0.013401	-	Domain of unknown function DUF1989
AFLA_136790	1704.699539	806.4649384	1.0798	0.0014185	0.02634	-	DHS-like NAD/FAD-binding domain||Thiamin diphosphate-binding fold||Thiamine pyrophosphate enzyme, C-terminal TPP-binding||Thiamine pyrophosphate enzyme, central domain||Thiamine pyrophosphate enzyme, N-terminal TPP-binding domain
AFLA_137560	540.8696759	1654.850536	-1.6133	0.0013551	0.025576	-	Cyanovirin-N
AFLA_137610	1.374660095	24.72043575	-4.1686	0.0012484	0.023848	-//-
AFLA_137860	702.6660845	1983.44437	-1.4971	0.00096992	0.019595	-//-
AFLA_138050	20.59861145	535.4264008	-4.7001	2.72E-11	2.91E-09	-	Cytochrome P450, E-class, group I||Cytochrome P450, conserved site||Cytochrome P450
AFLA_138420	93.87180693	388.5118179	-2.0492	0.0018492	0.031985	-//-
AFLA_138440	57.11342455	336.9133042	-2.5605	7.79E-05	0.0024788	-	TauD/TfdA-like domain
AFLA_138450	86.8133435	600.3753596	-2.7899	9.24E-05	0.0028041	-//-
AFLA_138580	62.40659576	15.53738568	2.006	2.50E-05	0.00091642	-//-
AFLA_138590	827.3763536	82.780978	3.3212	3.46E-08	2.31E-06	-	DJ-1/PfpI||Class I glutamine amidotransferase-like
AFLA_138600	16.62678414	3.138038745	2.4056	0.0019991	0.034111	-	Crotonase superfamily||ClpP/crotonase-like domain||Enoyl-CoA hydratase/isomerase, conserved site
AFLA_138640	8314.877079	2463.274778	1.7551	1.14E-05	0.00045613	-	Amino acid/polyamine transporter I
AFLA_138670	28.40358618	5.202386987	2.4488	0.00017749	0.004799	-	Aquaporin-like||Major intrinsic protein||Major intrinsic protein, conserved site
AFLA_138720	42.94259358	1919.537135	-5.4822	3.57E-36	2.82E-33	-	AMP-dependent synthetase/ligase
AFLA_138870	11055.43081	4200.356825	1.3962	7.40E-05	0.0023843	-	Cyanovirin-N
AFLA_138920	1.49146155	122.92323	-6.3649	0.00011492	0.0033204	-	FAD/NAD(P)-binding domain||Flavin monooxygenase-like
AFLA_139090	410.2209978	180.1541926	1.1872	0.001475	0.026996	-	Sugar/inositol transporter||Major facilitator, sugar transporter-like||Sugar transporter, conserved site||Major facilitator superfamily domain
AFLA_139140	1.226998146	220.7272962	-7.491	6.60E-11	6.78E-09	-	NADH:flavin oxidoreductase/NADH oxidase, N-terminal||Aldolase-type TIM barrel
AFLA_139150	2.900692654	5700.900425	-10.941	6.55E-14	9.62E-12	-	Domain of unknown function DUF4243
AFLA_139160	2.931553148	4748.961289	-10.662	1.96E-15	3.60E-13	-	NAD(P)-binding domain
AFLA_139170	3.199727067	5707.310963	-10.801	2.27E-09	1.80E-07	-	FAD/NAD(P)-binding domain
AFLA_139180	2.931553148	5573.028411	-10.893	1.29E-10	1.27E-08	-	Cytochrome P450||Cytochrome P450, E-class, group I||Cytochrome P450, conserved site
AFLA_139190	7.389138855	14866.58552	-10.974	1.38E-09	1.16E-07	-	Glucose-methanol-choline oxidoreductase||Glucose-methanol-choline oxidoreductase, N-terminal||FAD/NAD(P)-binding domain||Glucose-methanol-choline oxidoreductase, C-terminal
AFLA_139200	1.556893053	2856.025428	-10.841	2.63E-11	2.84E-09	-	Cytochrome P450, E-class, group I||Cytochrome P450, conserved site||Cytochrome P450
AFLA_139210	4.041749839	7938.514267	-10.94	3.99E-09	3.09E-07	-	O-methyltransferase, family 2||S-adenosyl-L-methionine-dependent methyltransferase||Winged helix-turn-helix DNA-binding domain||O-methyltransferase COMT-type
AFLA_139220	5.467779886	13153.45809	-11.232	1.27E-13	1.79E-11	-	O-methyltransferase, family 2||S-adenosyl-L-methionine-dependent methyltransferase||Winged helix-turn-helix DNA-binding domain||O-methyltransferase COMT-type
AFLA_139230	0.299034413	560.9392607	-10.873	1.23E-08	8.91E-07	-	NAD(P)-binding domain
AFLA_139240	0.598068826	1435.071599	-11.229	1.88E-09	1.52E-07	-	Protein of unknown function DUF1772
AFLA_139250	1.704555002	6248.354428	-11.84	3.68E-14	5.81E-12	-	Cytochrome P450||Cytochrome P450, conserved site||Cytochrome P450, E-class, group I
AFLA_139260	4.220272281	3678.894137	-9.7677	4.21E-11	4.43E-09	-	Cytochrome P450, conserved site||Cytochrome P450, E-class, group I||Cytochrome P450
AFLA_139270	804.9625021	12364.65993	-3.9412	1.12E-10	1.11E-08	-	Protein of unknown function DUF4267
AFLA_139280	22.71529181	4607.641966	-7.6642	5.62E-10	5.10E-08	-	Cytochrome P450||Cytochrome P450, E-class, group I
AFLA_139290	0.62892932	2119.61083	-11.719	3.35E-22	1.32E-19	-	Dimeric alpha-beta barrel||EthD domain
AFLA_139300	9.159125359	23281.90935	-11.312	1.38E-13	1.90E-11	-	Short-chain dehydrogenase/reductase SDR||Short-chain dehydrogenase/reductase, conserved site||NAD(P)-binding domain
AFLA_139310	5.893966789	12349.43907	-11.033	1.62E-14	2.66E-12	-	NADP-dependent oxidoreductase domain||Aldo/keto reductase/potassium channel subunit beta
AFLA_139320	8.616137001	13000.44553	-10.559	6.54E-16	1.29E-13	-	Alpha/beta hydrolase fold-3||Alpha/Beta hydrolase fold
AFLA_139330	8.970251882	9030.510757	-9.9754	1.75E-10	1.70E-08	-	NAD(P)-binding domain||Short-chain dehydrogenase/reductase, conserved site||Short-chain dehydrogenase/reductase SDR
AFLA_139340	547.7863693	9594.009611	-4.1304	2.07E-25	1.04E-22	-	Winged helix-turn-helix DNA-binding domain||S-adenosyl-L-methionine-dependent methyltransferase
AFLA_139370	355.4468638	4481.364647	-3.6562	0.0017344	0.030553	-	Acyl transferase||Acyl transferase/acyl hydrolase/lysophospholipase||MaoC-like domain||Acyl transferase domain||Fatty acid synthase||Polyketide synthase, acyl transferase domain||Fatty acid synthase, beta subunit, fungi||Domain of unknown function DUF1729||HotDog domain||Aldolase-type TIM barrel
AFLA_139380	427.6854845	3415.960836	-2.9977	0.00084996	0.017503	-	Phosphopantetheine-protein transferase domain||Beta-ketoacyl synthase, C-terminal||Polyketide synthase, beta-ketoacyl synthase domain||Polyketide synthase, ketoreductase domain||4'-phosphopantetheinyl transferase superfamily||NAD(P)-binding domain||Beta-ketoacyl synthase, N-terminal||Thiolase-like||Beta-ketoacyl synthase, active site
AFLA_139390	151.1169069	10898.03163	-6.1723	0.00011252	0.0032663	-	NAD(P)-binding domain||Short-chain dehydrogenase/reductase SDR
AFLA_139400	20.82205594	4288.216347	-7.6861	2.10E-07	1.21E-05	-	Protein of unknown function DUF1772
AFLA_139410	107.2178206	14045.9273	-7.0335	8.96E-05	0.0027508	-	Polyketide product template domain||Beta-ketoacyl synthase, C-terminal||Malonyl-CoA ACP transacylase, ACP-binding||Polyketide synthase, acyl transferase domain||Thiolase-like||Thioesterase||Polyketide synthase, phosphopantetheine-binding domain||Phosphopantetheine binding ACP domain||Acyl transferase||Starter unit:ACP transacylase||Polyketide synthase, dehydratase domain||Acyl transferase/acyl hy…
AFLA_139460	154.4088308	11179.01161	-6.1779	1.23E-46	1.41E-43	-	Major facilitator superfamily domain||Major facilitator superfamily
AFLA_139470	28.67742749	18124.25492	-9.3038	1.56E-77	6.55E-74	-	FAD/NAD(P)-binding domain||Amine oxidase
AFLA_139480	28.33718155	22597.68035	-9.6393	2.71E-81	1.71E-77	-	Tryptophan dimethylallyltransferase||Aromatic prenyltransferase, DMATS type
AFLA_139490	14.72593464	7377.693326	-8.9687	4.91E-71	1.55E-67	-	Polyketide synthase, ketoreductase domain||AMP-dependent synthetase/ligase||Condensation domain||NAD(P)-binding domain||Malonyl-CoA ACP transacylase, ACP-binding||Male sterility, NAD-binding||Beta-ketoacyl synthase, C-terminal||AMP-binding enzyme C-terminal domain||Thiolase-like||Polyketide synthase, acyl transferase domain||Polyketide synthase, phosphopantetheine-binding domain||Acyl transferase…
AFLA_139550	98.14834669	29.68932616	1.725	8.07E-05	0.0025536	-	Carotenoid oxygenase
