# Supplementary material for: Exploration of the Regulatory Mechanism of Secondary Metabolism by Comparative Transcriptomics in Aspergillus flavus
Source: Front Microbiol. 2018 Aug 7;9:1568. doi: 10.3389/fmicb.2018.01568 (PMC6090018; doi:10.3389/fmicb.2018.01568)
Supplement: TABLE S4 — Expression level of monooxygenase genes. [file Table_4.XLSX]

## Sheet: Sheet1
Gene ID	Discription	WT_YEP	WT_YES	ΔAfRafA_YES	ΔAfStuA_YEP	WT_YES vs WT_YEP	ΔAfRafA vs WT	ΔAfStuA vs WT
AFLA_002920	flavonoid 3-hydroxylase, putative	0.199923	0.103091	2.16316	0.979642	0.515656	20.983	9.50266
AFLA_004370	cytochrome P450 oxidoreductase, putative	16.2477	14.7997	12.8646	5.7141	0.910877	0.869245	0.386096
AFLA_013230	steroid monooxygenase, putative	23.6429	86.0035	0.03721	0.78444	3.6376	0.000432657	0.00912102
AFLA_017300	cytochrome P450 oxidoreductase OrdA-like, putative	284.733	448.113	297.52	96.5486	1.5738	0.66394	0.215456
AFLA_024140	xenobiotic compound monooxygenase, DszA family, putative	0.0496767	1.53678	2.12477	4.98679	30.9357	1.38261	3.24495
AFLA_029720	cytochrome P450, putative	15.9979	49.7558	62.3027	13.103	3.11014	1.25217	0.263347
AFLA_039200	cytochrome P450, putative	3.8073	90.8236	171.942	1.67685	23.8551	1.89314	0.0184627
AFLA_039210	cytochrome P450, putative	1.70618	66.4375	165.124	0.191526	38.9394	2.4854	0.0028828
AFLA_041280	dimethylaniline monooxygenase, putative	0.39981	20.7007	62.1459	1.89162	51.7763	3.00212	0.0913795
AFLA_047020	cytochrome P450 monooxygenase, putative	2.71125	3.5724	5.50992	9.61515	1.31762	1.54236	2.69151
AFLA_053540	FAD binding monooxygenase, putative	24.4485	16.5869	3.09066	3.2324	0.678444	0.186331	0.194876
AFLA_073600	cytochrome P450, putative	11.967	47.2912	37.0726	2.18978	3.95181	0.783921	0.0463041
AFLA_097470	benzoate 4-monooxygenase cytochrome P450, putative	520.175	180.068	341.958	47.1269	0.346169	1.89904	0.261717
AFLA_105630	cytochrome P450 monooxygenase, putative	4.97054	109.501	20.6334	0.146211	22.03	0.188431	0.00133525
AFLA_109290	cytochrome P450, putative	25.8371	7.38752	10.1018	0.0692343	0.285927	1.36742	0.0093718
AFLA_115900	benzoate 4-monooxygenase cytochrome P450, putative	115.685	59.2168	86.5915	0.938372	0.511878	1.46228	0.0158464
AFLA_117580	cytochrome P450, putative	0.742906	0.880823	6.70532	5.07547	1.18565	7.61257	5.7622
AFLA_121680	cytochrome P450, putative	0.229343	0.380371	0.467082	2.67929	1.65852	1.22796	7.0439
AFLA_121890	cytochrome P450 monooxygenase, putative	78.7356	23.8173	24.7356	72.5387	0.302498	1.03855	3.04563
AFLA_124500	nitric oxide synthase, putative	636.49	0.18436	0.228604	9.79225	0.000289652	1.23999	53.1147
AFLA_126620	cytochrome P450, putative	40.3444	52.736	53.7143	21.9952	1.30715	1.01855	0.417082
AFLA_126650	cytochrome P450, putative	1.16941	0.949427	1.35069	4.32719	0.811884	1.42263	4.55769
AFLA_138050	flavonoid 3-hydroxylase, putative	66.0283	31.2749	27.0982	1.15002	0.473659	0.866452	0.0367715
AFLA_138920	monooxygenase, putative	0.0820847	6.24503	0.164811	0.0721907	76.0803	0.0263907	0.0115597
AFLA_139160	aflX/ ordB/ monooxygenase/ oxidase	1.89513	538.079	2.40491	0.329204	283.927	0.00446944	0.000611814
AFLA_139170	aflW/ moxY/ monooxygenase	2.02286	297.508	1.36087	0.166735	147.073	0.00457421	0.000560439
AFLA_139180	aflV/ cypX/ cytochrome P450 monooxygenase	1.95528	329.814	1.4143	0.172687	168.679	0.00428817	0.000523588
AFLA_139200	aflQ/ ordA/ ord-1/ oxidoreductase/ cytochrome P450 monooxigenase	0.519389	129.438	0.708315	0.071268	249.213	0.00547223	0.000550595
AFLA_139230	aflI/ avfA/ cytochrome P450 monooxygenase	0.527045	55.4432	0.138361	0.0300557	105.196	0.00249554	0.000542099
AFLA_139250	aflL/ verB/ desaturase/ P450 monooxygenase	1.93975	352.148	1.82598	0.09408	181.543	0.00518525	0.00026716
AFLA_139260	aflG/ avnA/ ord-1/ cytochrome P450 monooxygenase	1.54468	224.125	1.51885	0.255996	145.095	0.00677682	0.0011422
AFLA_139280	aflN/ verA/ monooxygenase	4.28041	262.585	1.86456	1.24952	61.3458	0.00710079	0.00475853
AFLA_139400	aflCa / hypC / hypothetical protein	5.59903	613.468	4.18046	2.9238	109.567	0.00681447	0.00476601
